# Supplementary material for: Thio-modified trianglimines, a novel group of chiral macrocyclic compounds of high structural dynamics
Source: Research Square preprint supplement (doi:10.21203/rs.3.rs-5365945/v1), 2024-12-13
Supplement: Supplementary file 1 [file 35260c3c76e18e502fbb65f8.pdf]

Supporting Information for:

Thio-modified trianglimines, a novel group of chiral macrocyclic compounds of high structural dynamics

Natalia Prusinowska<sup>1</sup>, Agnieszka Czapik<sup>1</sup>, Joanna Szymkowiak<sup>2</sup>, and Marcin Kwit<sup>1\*</sup>

1) Faculty of Chemistry, Adam Mickiewicz University, Uniwersytetu Poznańskiego 8, 61 614 Poznan, Poland. E-mail: marcin.kwit@amu.edu.pl

2) Faculty of Science, Department of Chemistry University of British Columbia, 2036 Main Mall, Vancouver, British Columbia, BC Canada V6T 1Z1.

## TABLE OF CONTENTS

|                                                                                            |            |
|--------------------------------------------------------------------------------------------|------------|
| <b>1 Experimental details.....</b>                                                         | <b>3</b>   |
| <b>2 UV and ECD spectra .....</b>                                                          | <b>6</b>   |
| <b>3 Calculation details .....</b>                                                         | <b>20</b>  |
| <b>4 Single crystals X-ray analysis.....</b>                                               | <b>152</b> |
| <b>5 Copies of <math>^1\text{H}</math> and <math>^{13}\text{C}</math> NMR spectra.....</b> | <b>159</b> |
| <b>6 References.....</b>                                                                   | <b>196</b> |

## 1 Experimental details

All commercially available reagents were obtained from commercial suppliers and, unless specified otherwise, used in reactions without further purification. The anhydrous dichloromethane and chloroform were distilled over calcium hydride under an inert atmosphere. Flash column chromatography was performed on Merck Kieselgel type 60 (250- 400 mesh). Merck Kieselgel type 60F<sub>254</sub> analytical plates were used for TLC analysis.

<sup>1</sup>H and <sup>13</sup>C NMR spectra were recorded on a Bruker 400 MHz or Bruker 600 MHz at ambient or at low temperature. All NMR spectra are reported in parts per million (ppm) downfield of TMS and were measured relative to the signals for residual CDCl<sub>3</sub> (7.27 ppm and 77.0 ppm, respectively for <sup>1</sup>H and <sup>13</sup>C NMR spectra). All <sup>13</sup>C NMR spectra were obtained with 1H decoupling. Mass spectra were recorded on AB Sciex TripleTOF® 5600+ System. Melting points were measured by using open glass capillaries in a Büchi Melting Point B-545 apparatus.

A Jasco P-2000 polarimeter was used for optical rotation measurements (at 20 °C). UV and CD spectra were recorded on a Jasco J-810 spectropolarimeter at room temperature in cyclohexane and acetonitrile. In selected cases, dichloromethane has been used as the solvent. The UV and CD measurements have been done with the use of a quartz cell of optical lengths 0.1 cm. The concentration of analytes ranged from 1.0 to 2.0 × 10<sup>-4</sup> mol L<sup>-1</sup>. Background spectra of the pure solvents were recorded from 400 to 185 (225 nm in the case of dichloromethane) nm with the scan speed of 100 nm min<sup>-1</sup>. The ECD spectra of analytes were measured with 8 accumulations.

**Dialdehyde 3** was obtained according to the previously published procedure.[1]

**Dialdehyde 4:** terephthalaldehyde (2.6 g, 19.4 mmol) was dissolved in concentrated sulfuric acid (25 mL) and heated to 60 °C. *N*-Bromosuccinimide (3.98 g, 22.4 mmol) was added portionwise over 15 min, and the solution was heated at 60 °C for 3 h. The solution was poured onto ice, and the white precipitate was filtered off. The solid was dissolved in dichloromethane and extracted with sat. NaHCO<sub>3</sub>, then brine and dried over anhydrous Na<sub>2</sub>SO<sub>4</sub>. The solvent was removed in vacuo. Purification of the residue by column chromatography (DCM/hexane 2:1 to DCM) furnished the product [yield 729 mg, (18%)] and dialdehyde **3** [yield 1.796g (32%)]. All spectra are in accordance with literature data.

### General procedure for synthesis of symmetrical dialdehydes with sulfur substituents

A suspension of 2,5-dibromoterephthalaldehyde (x mmol, 1 equiv.), corresponding thiol (2 equiv.) and K<sub>2</sub>CO<sub>3</sub> (4 equiv.) in anhydrous DMF (25 mL) was mixed at 85 °C for overnight. The mixture was cooled, the water (25 mL) was added and extracted with ethyl acetate (3 x 25 mL). The organic layer was washed with water, brine and dried over Na<sub>2</sub>SO<sub>4</sub>. The solvent was evaporated and the residue was chromatographed through a silica gel column using hexane:DCM 1:1 as eluent to afford product.

**Dialdehyde 5a:** orange amorphous solid, yield 547 mg (81%, x = 2 mmol); mp 147-149 °C; IR (ATR): 3062, 3029, 2919, 2835, 1675, 1603, 1582, 1495, 1451, 1351, 1294, 1177, 1158, 1100, 1065, 1033, 922, 869, 830, 809, 793, 700 cm<sup>-1</sup>; <sup>1</sup>H NMR (400 MHz, CDCl<sub>3</sub>) δ: 10.19 (s, 2H), 7.86 (s, 2H), 7.28-7.21 (m, 10H), 4.14 (s, 4H) ppm; <sup>13</sup>C{H} NMR (101 MHz, CDCl<sub>3</sub>) δ: 190.3, 138.4, 137.8, 135.6, 133.0, 129.0, 128.7, 127.7, 39.3 ppm; HRMS (ESI) *m/z*: [M + Na]<sup>+</sup> calcd for C<sub>22</sub>H<sub>18</sub>O<sub>2</sub>S<sub>2</sub>Na 401.0635, found 401.0627.

**Dialdehyde 5b:** orange amorphous solid, yield 314 mg (42%, x = 1.85 mmol); mp 163-165 °C; IR (ATR): 3062, 3026, 2955, 2918, 2871, 2790, 1675, 1601, 1582, 1480, 1447, 1428, 1418, 1209, 1176, 1108, 876, 783, 756, 729, 696, 660 cm<sup>-1</sup>; <sup>1</sup>H NMR (400 MHz, CDCl<sub>3</sub>) δ: 10.41 (s, 2H), 7.86 (s, 2H), 7.33-7.20 (m, 10H), 3.29-3.25 (m, 4H), 3.01-2.97 (m, 4H) ppm; <sup>13</sup>C{H} NMR (101 MHz, CDCl<sub>3</sub>) δ: 190.4, 139.2, 138.7, 137.1, 131.4, 128.7, 128.5, 126.8, 35.4, 35.1 ppm; HRMS (ESI) *m/z*: [M + Na]<sup>+</sup> calcd for C<sub>24</sub>H<sub>22</sub>O<sub>2</sub>S<sub>2</sub>Na 429.0953, found 429.0950.

**Dialdehyde 5c:** yellow amorphous solid, yield 666 mg (72%, x = 2 mmol); mp 159-162 °C; IR (ATR): 3077, 2956, 2900, 2867, 2774, 1684, 1594, 1488, 1448, 1399, 1361, 1286, 1173, 1101, 1013, 891, 830, 779, 734, 652, 559 cm<sup>-1</sup>; <sup>1</sup>H NMR (300 MHz, CDCl<sub>3</sub>) δ: 10.26 (s, 2H), 7.56 (s, 2H), 7.43 (d, *J* = 8.5 Hz, 4H), 7.36 (d, *J* = 8.5 Hz, 1.34 (s, 18H) ppm; <sup>13</sup>C{H} NMR (75 MHz, CDCl<sub>3</sub>) δ: 190.7, 152.5, 139.7, 136.4, 133.4, 133.0, 128.5, 127.1, 34.8, 31.2 ppm; HRMS (ESI) *m/z*: [M + Na]<sup>+</sup> calcd for C<sub>28</sub>H<sub>30</sub>O<sub>2</sub>S<sub>2</sub>Na 485.1579, found 485.1580.

**Dialdehyde 5d:** yellow amorphous solid, yield 836 mg (77%, x = 2 mmol); mp 245-248 °C; IR (ATR): 3099, 2957, 2869, 2775, 1711, 1675, 1592, 1564, 1463, 1396, 1355, 1267, 1170, 1153, 1109, 1092, 1014, 948, 890, 825, 761, 692 cm<sup>-1</sup>; <sup>1</sup>H NMR (400 MHz, CDCl<sub>3</sub>) δ: 10.31 (s, 2H), 8.04 (d, *J* = 8.6 Hz, 4H), 7.76 (s, 2H), 7.41 (d, *J* = 8.6 Hz, 4H), 4.34 (t, *J* = 6.6 Hz, 4H), 1.79-1.72 (m, 4H), 1.53-1.42 (m, 4H), 0.98 (t, *J* = 7.4 Hz, 6H) ppm; <sup>13</sup>C{H} NMR (101 MHz, CDCl<sub>3</sub>) δ: 189.9, 165.7, 138.9, 138.2, 137.6, 134.7, 131.1, 130.9, 130.4, 65.1, 30.7, 19.2, 13.7 ppm; HRMS (ESI) *m/z*: [M + Na]<sup>+</sup> calcd for C<sub>30</sub>H<sub>30</sub>O<sub>6</sub>S<sub>2</sub>Na 573.1376, found 573.1369.

**Dialdehyde 5e:** yellow amorphous solid, yield 598 mg (72%, x = 1.85 mmol); mp 185-188 °C; IR (ATR): 3049, 2987, 2869, 2782, 1680, 1582, 1496, 1445, 1414, 1338, 1286, 1175, 1128, 1097, 895, 876, 860, 790, 745, 473 cm<sup>-1</sup>; <sup>1</sup>H NMR (400 MHz, CDCl<sub>3</sub>) δ: 10.24 (s, 2H), 7.98 (d, *J* = 1.7 Hz, 2H), 7.89-7.6 (m, 4H), 7.82-7.80 (m, 2H), 7.63 (s, 2H), 7.58-7.52 (m, 4H), 7.44 (dd, *J* = 8.6, 1.9 Hz, 2H) ppm; <sup>13</sup>C{H} NMR (101 MHz, CDCl<sub>3</sub>) δ: 190.4, 139.3, 136.5, 133.9, 133.7, 133.0, 132.8, 129.9, 129.5, 129.3, 127.9, 127.7, 127.2, 127.0 ppm; HRMS (ESI) *m/z*: [M + Na]<sup>+</sup> calcd for C<sub>28</sub>H<sub>18</sub>O<sub>2</sub>S<sub>2</sub>Na 473.0640, found 473.0639.

**Dialdehyde 5f:** the crude residue was then purified by column chromatography (Aluminum oxide, hexane-DCM 1:1) to afford product as a yellow crystalline solid, yield 828 mg (66%, x = 2 mmol); mp 178-180 °C; IR (ATR): 3059, 3029, 2923, 2875, 1682, 1658, 1597, 1489, 1444, 1383, 1339, 1319, 1277, 1146, 1010, 753, 740, 693, 637 cm<sup>-1</sup>; <sup>1</sup>H NMR (600 MHz, CDCl<sub>3</sub>) δ: 9.57 (s, 2H), 7.60 (s, 2H), 7.32-7.13 (m, 30H) ppm; <sup>13</sup>C{H} NMR (151 MHz, CDCl<sub>3</sub>) δ: 189.6, 142.9, 138.1, 136.5, 129.8, 128.0, 127.3, 127.1, 72.6 ppm; HRMS (ESI) *m/z*: [M + Na]<sup>+</sup> calcd for C<sub>46</sub>H<sub>34</sub>O<sub>2</sub>S<sub>2</sub>Na 705.1892, found 705.1870.

**Dialdehyde 5g:** A suspension of 2,5-dibromoterephthaldehyde (592 mg, 2 mmol, 1 equiv.), benzyl mercaptan (0.25 mL, 1 equiv.) and K<sub>2</sub>CO<sub>3</sub> (590 mg, 2 equiv.) in anhydrous DMF (20 mL) was mixed at room temperature for overnight. The water (25 mL) was added and extracted with ethyl acetate (3 x 25 mL). The organic layer was washed with water, brine and dried over Na<sub>2</sub>SO<sub>4</sub>. The solvent was evaporated and the residue was chromatographed through a silica gel column using hexane:DCM 1:1 as eluent to afford product as yellow solid. Yield 353 mg (52%); mp 104-106 °C; IR (ATR): 3067, 3026, 2926, 2876, 2848, 1681, 1603, 1579, 1525, 1495, 1445, 1406, 1335, 1291, 1167, 1085, 826, 774, 696, 497, 478 cm<sup>-1</sup>; <sup>1</sup>H NMR (400 MHz, CDCl<sub>3</sub>) δ: 10.35 (s, 1H), 10.20 (s, 1H), 8.03 (s, 1H), 7.98 (s, 1H), 7.32-7.23 (m, 5H), 4.19 (s, 2H) ppm; <sup>13</sup>C{H} NMR (101 MHz, CDCl<sub>3</sub>) δ: 190.7, 189.2, 140.8, 138.5, 136.0, 135.96, 135.3, 131.0, 129.0, 128.8, 127.9, 123.5, 38.7 ppm; HRMS (ESI) *m/z*: [M + Na]<sup>+</sup> calcd for C<sub>15</sub>H<sub>11</sub>O<sub>2</sub>SBrNa 356.9555/358.9535, found 356.9543/358.9526.

**Dialdehyde 5h:** A suspension of 2-bromoterephthaldehyde (405 mg, 1.9 mmol, 1 equiv.), benzyl mercaptan (0.25 mL, 1 equiv.) and K<sub>2</sub>CO<sub>3</sub> (530 mg, 2 equiv.) in anhydrous DMF (20 mL) was mixed at room temperature for overnight. The water (25 mL) was added and extracted with ethyl acetate (3 x 25 mL). The organic layer was washed with water, brine and dried over Na<sub>2</sub>SO<sub>4</sub>. The solvent was evaporated and the residue was chromatographed through a silica gel column using hexane:DCM 1:1 as eluent to afford product as colourless crystalline solid. Yield 258 mg (53%); mp 98-105 °C; IR (ATR): 3058, 3029, 2987, 2972, 2926 cm<sup>-1</sup>; <sup>1</sup>H NMR (600 MHz, CDCl<sub>3</sub>) δ: 10.31 (s, 1H), 10.04 (s, 1H), 7.96 (d, *J* = 7.8 Hz, 1H), 7.95 (d, *J* = 1.4 Hz, 1H), 7.78 (dd, *J* = 7.8, 1.4 Hz, 1H), 7.31-7.24 (m, 5H), 4.21 (s, 2H) ppm; <sup>13</sup>C{H} NMR (151 MHz, CDCl<sub>3</sub>) δ: 191.1, 190.7, 142.3, 139.2, 138.0, 135.5, 132.0, 130.3, 129.0, 128.7, 127.8, 126.8, 38.7 ppm; HRMS (ESI) *m/z*: [M + Na]<sup>+</sup> calcd for C<sub>15</sub>H<sub>12</sub>O<sub>2</sub>SNa 279.0450, found 279.0454.

#### General procedure for synthesis of macrocycles 6a-6h.

To a solution of (*R,R*)-DACH (0.5 mmol, 1 equiv.) in DCM (1 mL) was added solution of dialdehyde (0.5 mmol, 1 eq) in DCM (4 mL). The solution was stirred at room temperature for 24 h. The solvent was evaporated to obtain crude product.

**Macrocycle 6a:** yellow amorphous solid, yield 229 mg (100%); mp 109-113 °C; IR ATR: 2970, 2924, 2855, 1631, 1494, 1450, 1364, 1230, 1068, 1029, 695 cm<sup>-1</sup>; <sup>1</sup>H NMR (400 MHz, CDCl<sub>3</sub>) δ: 8.50 (s, 6H), 7.71 (s, 6H), 7.23-7.16 (m, 18H), 7.05-7.02 (m, 12H), 3.79 (d, *J* = 12 Hz, 6H), 3.58 (d, *J* = 11.9 Hz, 6H), 3.34-3.31 (m, 6H), 1.87-1.85 (m, 6H), 1.76 (bs, 12H), 1.47 (m, 1H) ppm; <sup>13</sup>C{H} NMR (101 MHz, CDCl<sub>3</sub>) δ: 158.0, 137.2, 136.5, 135.7, 129.1, 129.0, 128.4, 127.2, 74.1, 39.3, 32.7, 24.4 ppm; HRMS (ESI) *m/z*: [M + H]<sup>+</sup> calcd for C<sub>84</sub>H<sub>85</sub>N<sub>6</sub>S<sub>6</sub> 1369.5154, found 1369.5117/499.

**Macrocycle 6b:** pale yellow crystalline solid, yield 215 mg (100%); mp 160-162 °C; IR ATR: 3061, 2926, 2856, 1631, 1592, 1490, 1450, 1398, 1364, 1177, 1102, 1014, 936, 840, 758, 692, 426 cm<sup>-1</sup>; <sup>1</sup>H NMR (400 MHz, CDCl<sub>3</sub>) δ: 8.60 (s, 6H), 7.85 (s, 6H), 7.29-7.14 (m, 30H), 3.48-3.41 (m, 6H), 3.01-2.94 (m, 6H), 2.88-2.81 (m, 6H), 2.70 (t, *J* = 7.7 Hz, 12H), 1.90-1.84 (m, 18H), 1.54-1.52 (m, 6H) ppm; <sup>13</sup>C{H} NMR (101 MHz, CDCl<sub>3</sub>) δ: 157.8, 140.0, 137.1, 135.1, 128.6, 128.4, 126.4, 74.2, 35.6, 35.2, 32.8, 24.5 ppm; HRMS (ESI) *m/z*: [M + H]<sup>+</sup> calcd for C<sub>90</sub>H<sub>97</sub>N<sub>6</sub>S<sub>6</sub> 1454.6127, found 1454.6109.

**Macrocycle 6c:** pale yellow amorphous solid; yield 255 mg (100%); mp 172-174 °C; IR ATR: 2929, 2857, 1633, 1578, 1487, 1460, 1361, 1340, 1267, 1118, 1081, 1011, 821, 730, 545 cm<sup>-1</sup>; <sup>1</sup>H NMR (400 MHz, CDCl<sub>3</sub>) δ: 8.42 (s, 6H), 7.88 (s, 6H), 7.20 (d, *J* = 8.6 Hz, 12H), 7.00 (d, *J* = 8.6 Hz, 12H), 3.08-3.06 (m, 6H), 1.70-1.37 (m, 8H), 1.27 (s, 54H) ppm; <sup>13</sup>C{H} NMR (100 MHz, CDCl<sub>3</sub>) δ: 158.7, 149.5, 138.8, 135.2, 133.2, 132.7, 129.3, 126.2, 73.4, 34.5, 32.2, 31.3, 24.2 ppm; HRMS (ESI) *m/z*: [M + H]<sup>+</sup> calcd for C<sub>102</sub>H<sub>121</sub>N<sub>6</sub>S<sub>6</sub>, 1622.8055; found, 1622.7999.

**Macrocycle 6d:** pale yellow amorphous solid; yield 316 mg (100%); mp 94-96 °C; IR ATR: 2926, 2857, 1713, 1631, 1592, 1489, 1450, 1398, 1363, 1267, 1177, 1102, 1031, 840, 758, 690 cm<sup>-1</sup>; <sup>1</sup>H NMR (600 MHz, CDCl<sub>3</sub>) δ: 8.44 (s, 6H), 8.09 (s, 6H), 7.84 (d, *J* = 8.8 Hz, 12H), 7.04 (d, *J* = 8.7 Hz, 12H), 4.33-4.31 (m, 12H), 3.19-3.14 (m, 6H), 1.77-1.69 (m, 18H), 1.57-1.42 (m, 24H), 1.28 (t, *J* = 9.8 Hz, 6H), 0.97 (t, *J* = 7.4 Hz, 18H) ppm; <sup>13</sup>C{H} NMR (151 MHz, CDCl<sub>3</sub>) δ: 166.0, 157.9, 142.9, 140.4, 135.0, 133.6, 130.2, 128.0, 126.9, 73.7, 64.9, 32.2, 30.8, 24.1, 19.2, 13.7 ppm; HRMS (ESI) *m/z*: [M + H]<sup>+</sup> calcd for C<sub>108</sub>H<sub>121</sub>N<sub>6</sub>O<sub>12</sub>S<sub>6</sub>, 1886.7395, found 1886.7420.



**Macrocycle 6e:** total volume of DCM used for reaction was 18 mL; yellow amorphous solid; yield 267 mg (100%); mp 148-149 °C; IR ATR: 3051, 2924, 2854, 1626, 1587, 1499, 1477, 1361, 1339, 1132, 1069, 940, 848, 809, 740, 472 cm<sup>-1</sup>; <sup>1</sup>H NMR (600 MHz, CDCl<sub>3</sub>) δ: 8.45 (s, 6H), 8.02 (s, 6H), 7.74 – 7.73 (m, 6H), 7.60 – 7.58 (m, 6H), 7.50 (d, *J* = 1.6 Hz, 6H), 7.45 – 7.42 (m, 18H), 6.95 (dd, *J* = 8.6, 1.9 Hz, 1H), 3.07-3.02 (m, 6H), 1.52 (d, *J* = 8.3 Hz, 6H), 1.40 (d, *J* = 8.6 Hz, 6H), 1.18 (d, *J* = 13.6 Hz, 6H), 1.12 (t, *J* = 9.9 Hz, 6H) ppm; <sup>13</sup>C{H} NMR (151 MHz, CDCl<sub>3</sub>) δ: 158.3, 139.3, 134.9, 133.6, 133.5, 133.5, 131.8, 128.7, 127.8, 127.5, 127.2, 126.7, 126.5, 125.9, 73.6, 32.1, 24.0 ppm; HRMS (ESI) *m/z*: [M + H]<sup>+</sup> calcd for C<sub>102</sub>H<sub>85</sub>N<sub>2</sub>S<sub>6</sub> 1586.5188, found 1586.5203.

**Macrocycle 6f:** scale n = 0.64 mmol; the product was crystallized from DCM/hexane as pale yellow crystalline solid; yield 259 mg (53%); mp 124-134 °C; IR ATR: 3055, 3031, 2920, 2857, 1633, 1594, 1488, 1444, 1357, 1336, 1035, 735, 698, 614 cm<sup>-1</sup>; <sup>1</sup>H NMR (300 MHz, CDCl<sub>3</sub>) δ: 7.69 (s, 6H), 7.57 (s, 6H), 7.33-7.30 (m, 36H), 6.93-6.91 (m, 54H), 2.55 (bs, 6H), 1.74-1.62 (m, 10H), 1.27 (bs, 14H) ppm; <sup>13</sup>C{H} NMR (75 MHz, CDCl<sub>3</sub>) δ: 156.0, 143.9, 140.9, 135.7, 134.2, 129.8, 127.6, 126.4, 73.4, 71.6, 32.5, 24.5 ppm; HRMS (ESI) *m/z*: [M + H]<sup>+</sup> calcd for C<sub>156</sub>H<sub>133</sub>N<sub>6</sub>S<sub>6</sub> 2282.8944, found 2282.8954.

**Macrocycle 6g:** the product crystallized from Et<sub>2</sub>O as mixture of isomers (symmetry C<sub>1</sub> and C<sub>3</sub> 3:1); pale yellow crystalline solid, yield 206 mg (100%); mp 155-159 °C; IR ATR: 3060, 3027, 2925, 2854, 1631, 1494, 1448, 1361, 1070, 936, 836, 697, 418 cm<sup>-1</sup>; <sup>1</sup>H NMR (400 MHz, CDCl<sub>3</sub>) δ: 8.55 (s, 1H), 8.50 (s, 2H), 8.49 (s, 1H), 8.46 (s, 1H), 8.46 (s, 1H), 8.44 (s, 1H), 8.41 (s, 1H), 8.00 (s, 1H), 7.97 (s, 1H), 7.94 (s, 2H), 7.93 (s, 1H), 7.93 (s, 1H), 7.87 (s, 1H), 7.85 (s, 1H), 7.80 (s, 1H), 7.27-7.12 (m, 20H), 4.00 (s, 2H), 3.97-3.86 (m, 6H), 3.53-3.42 (m, 4H), 3.36-3.26 (m, 4H), 1.89-1.74 (m, 24H), 1.52-1.43 (m, 8H) ppm; <sup>13</sup>C{H} NMR (151 MHz, CDCl<sub>3</sub>) δ: 159.0, 158.97, 158.9, 158.7, 157.38, 157.35, 157.2, 138.6, 138.50, 138.48, 138.42, 136.41, 136.36, 136.31, 136.31, 136.3, 136.2, 136.1, 135.81, 135.78, 135.7, 135.59, 135.57, 131.5, 131.3, 131.2, 131.1, 130.9, 130.40, 130.39, 129.1, 129.0, 128.92, 128.89, 128.41, 128.38, 128.36, 127.29, 127.26, 127.2, 123.8, 123.7, 123.6, 123.5, 74.6, 74.4, 74.3, 74.2, 74.0, 73.9, 73.8, 73.5, 39.9, 39.6, 39.4, 39.36, 32.8, 32.63, 32.61, 32.4, 32.3, 24.31, 24.25, 24.19, 24.19 ppm; HRMS (ESI) *m/z*: [M + H]<sup>+</sup> calcd for C<sub>63</sub>H<sub>64</sub>Br<sub>3</sub>N<sub>6</sub>S<sub>3</sub> 1239.1879/1241.1858, found 1239.1893/1241.1881.

**Macrocycle 6h:** mixture of isomers; pale yellow amorphous solid, yield 170 mg (100%); mp 117-123 °C; IR ATR: 3054, 2924, 2853, 1632, 1590, 1495, 1448, 1370, 1339, 1068, 109, 936, 812, 696, 472 cm<sup>-1</sup>; <sup>1</sup>H NMR (600 MHz, CDCl<sub>3</sub>) δ: 8.62 (d, *J* = 2.0 Hz, 6H), 8.53 (d, *J* = 2.5 Hz, 6H), 8.12 (s, 3H), 8.11 (s, 3H), 8.05 (s, 3H), 8.03 (s, 3H), 7.84 (d, *J* = 1.4 Hz, 3H), 7.79 (s, 6H), 7.73 (dd, *J* = 7.4, 3.4 Hz, 6H), 7.72 (s, 3H), 7.65 (dd, *J* = 7.9, 4.3 Hz, 6H), 7.24 – 7.20 (m, 8H), 7.18 – 7.10 (m, 36H), 7.08 – 7.06 (m, 16H), 6.94 (dd, *J* = 7.9, 1.3 Hz, 3H), 6.91 (dd, *J* = 7.9, 1.3 Hz, 3H), 3.89 – 3.70 (m, 24H), 3.41 – 3.31 (m, 24H), 1.85 – 1.75 (m, 72H), 1.54 – 1.40 (m, 24H) ppm; <sup>13</sup>C{H} NMR (151 MHz, CDCl<sub>3</sub>) δ: 159.5, 158.6, 158.5, 158.4, 158.4, 137.6, 137.7, 137.7, 137.7, 137.6, 137.1, 137.1, 137.0, 136.8, 136.6, 136.5, 136.4, 136.4, 129.0, 128.9, 128.9, 128.8, 128.4, 128.3, 128.3, 128.3, 128.1, 128.1, 127.9, 127.9, 127.8, 127.8, 127.7, 127.5, 127.4, 127.4, 127.2, 127.2, 127.1, 127.1, 74.4, 74.4, 74.2, 74.1, 73.9, 73.7, 39.7, 39.4, 39.2, 39.2, 32.8, 32.7, 32.6, 32.6, 32.5, 32.5, 29.6, 29.6, 24.4, 24.4, 24.3, 24.3 ppm; HRMS (ESI) *m/z*: [M + H]<sup>+</sup> calcd for C<sub>63</sub>H<sub>67</sub>N<sub>6</sub>S<sub>3</sub> 1003.4584, found 1003.4581.

**Macrocycle 7:** To a solution of macrocycle **6a** (0.077 mmol, 1 equiv.) in DCM/MeOH (4 mL, 1:1, v/v) at 0 °C was added in one portion NaBH<sub>4</sub> (15mg, 4 mmol, 5.2 equiv.). The mixture was mixed overnight at room temperature. The solvents were evaporated and the residue was dissolved in DCM and washed twice with saturated solution of Na<sub>2</sub>CO<sub>3</sub> and brine, dried over Na<sub>2</sub>SO<sub>4</sub>. The solvent was removed in vacuo to obtain the product as colourless foam, yield 75 mg (71%); mp 89-90 °C; IR ATR: 3287, 3059, 3026, 2922, 2851, 1583, 1493, 1450, 1356, 1335, 1175, 1092, 1069, 1028, 859, 764, 695, 561, 458 cm<sup>-1</sup>; <sup>1</sup>H NMR (600 MHz, CDCl<sub>3</sub>) δ: 7.28 (s, 6H), 7.16-7.15 (m, 18H), 7.06-7.05 (m, 12H), 3.94-3.89 (m, 12H), 3.74 (d, *J* = 13.3 Hz, 6H), 3.52 (d, *J* = 13.2 Hz, 6H), 2.13-2.11 (m, 12H), 1.71 (d, *J* = 8.4 Hz, 12H), 1.19 (t, *J* = 10.0 Hz, 6H), 0.94 (bs, 6H) ppm; <sup>13</sup>C{H} NMR (101 MHz, CDCl<sub>3</sub>) δ: 139.8, 137.6, 133.5, 130.7, 128.9, 128.3, 127.0, 60.7, 48.5, 39.0, 31.3, 25.0 ppm; HRMS (ESI) *m/z*: [M + H]<sup>+</sup> calcd for C<sub>84</sub>H<sub>97</sub>N<sub>6</sub>S<sub>6</sub> 1381.6093, found 1381.6081.

**Table S1.** Concentrations (c, in mol L<sup>-1</sup>) of the samples used for UV and ECD measurements.

|           | Cyclohexane           | Dichloromethane         | Acetonitrile          |
|-----------|-----------------------|-------------------------|-----------------------|
| <b>6a</b> | $7.31 \times 10^{-4}$ | $7.4 \times 10^{-4}$    | $4.5 \times 10^{-5}$  |
| <b>6b</b> | $6.44 \times 10^{-5}$ | $6.92 \times 10^{-5}$   | $3.75 \times 10^{-5}$ |
| <b>6c</b> | $6.21 \times 10^{-5}$ | $6.21 \times 10^{-5}$   | $6.23 \times 10^{-5}$ |
| <b>6d</b> | $5.38 \times 10^{-5}$ | $5.33 \times 10^{-5}$   | $5.4 \times 10^{-5}$  |
| <b>6e</b> | $5.33 \times 10^{-5}$ | $6.37 \times 10^{-5}$   | $3.77 \times 10^{-5}$ |
| <b>6f</b> | $8.79 \times 10^{-5}$ | $8.77 \times 10^{-5}$   | $8.8 \times 10^{-5}$  |
| <b>6g</b> | $6.51 \times 10^{-5}$ | $8.18 \times 10^{-5}$   | $1.47 \times 10^{-5}$ |
| <b>6h</b> | $9.98 \times 10^{-5}$ | $1.0005 \times 10^{-4}$ | insoluble             |
| <b>7</b>  | $6.85 \times 10^{-5}$ | $6.83 \times 10^{-5}$   | $5.86 \times 10^{-5}$ |

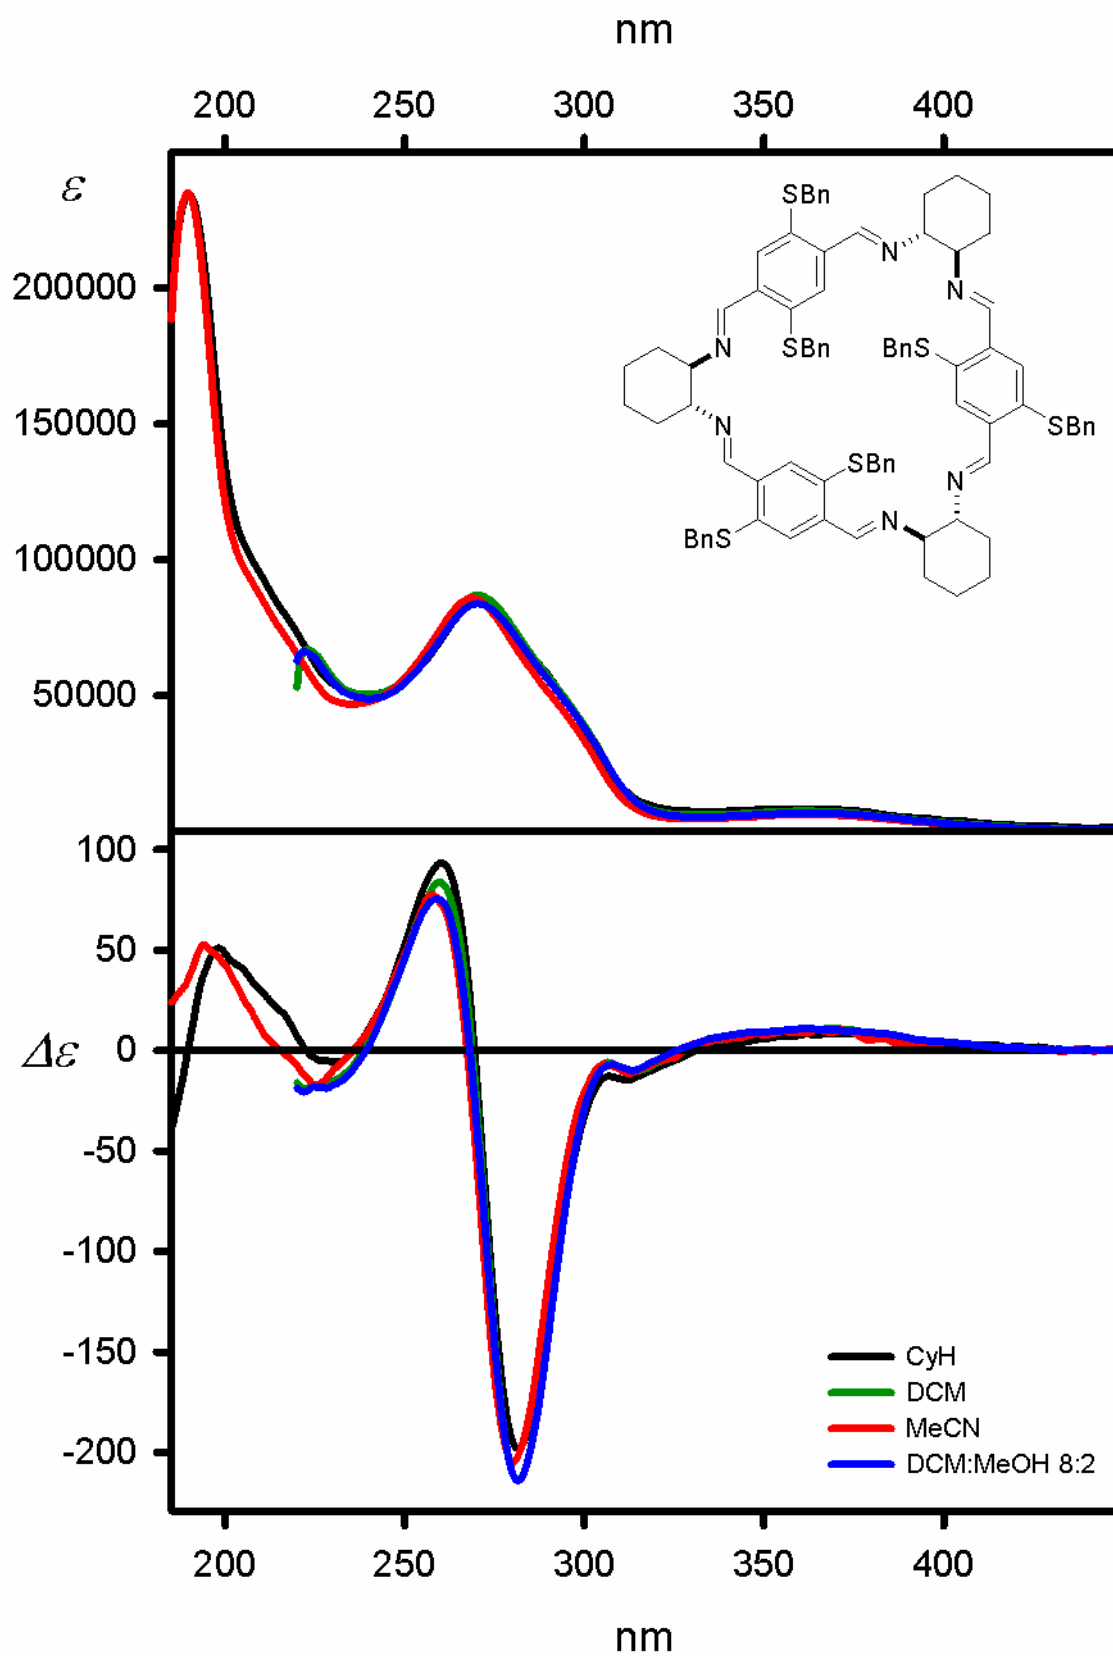

**Figure S1.** UV (upper panel) and ECD (lower panel) spectra of triaglimine **6a**, measured in cyclohexane (black lines), dichloromethane (dark-green lines), acetonitrile (red lines), and dichloromethane containing 20% of methanol (blue lines).

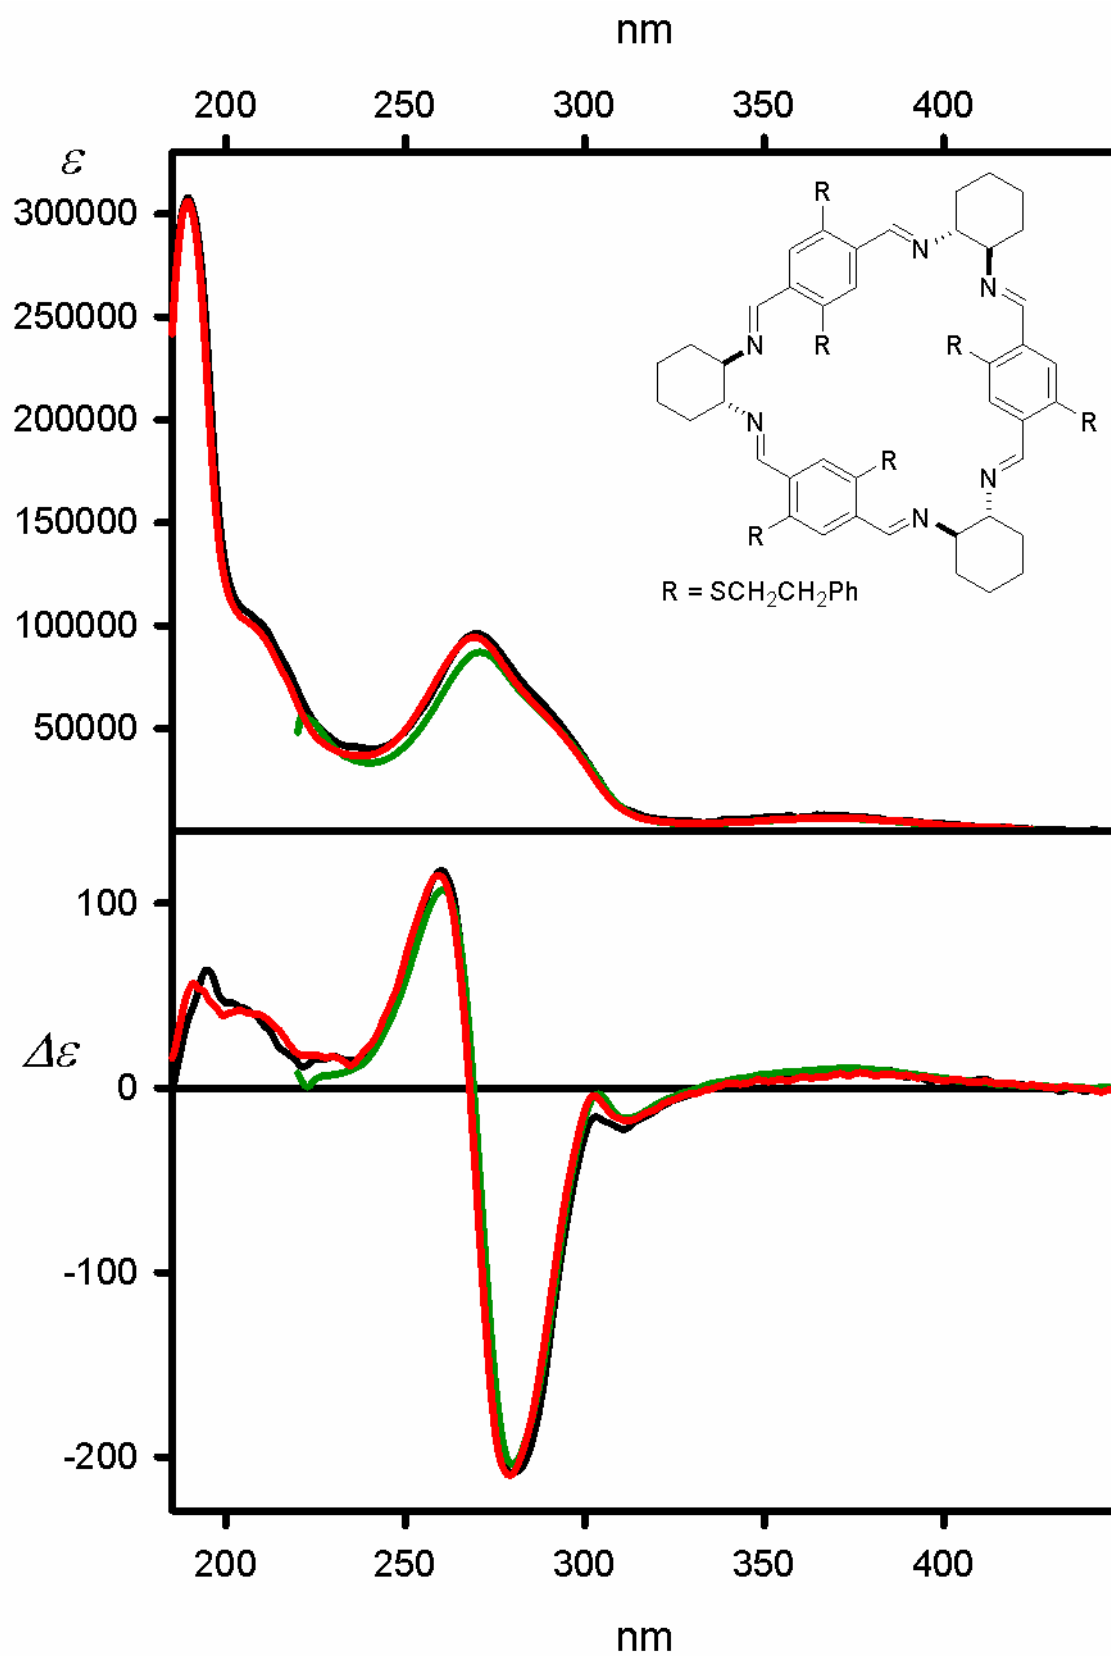

**Figure S2.** UV (upper panel) and ECD (lower panel) spectra of trianglimine **6b**, measured in cyclohexane (black lines), dichloromethane (dark-green lines), and acetonitrile (red lines).

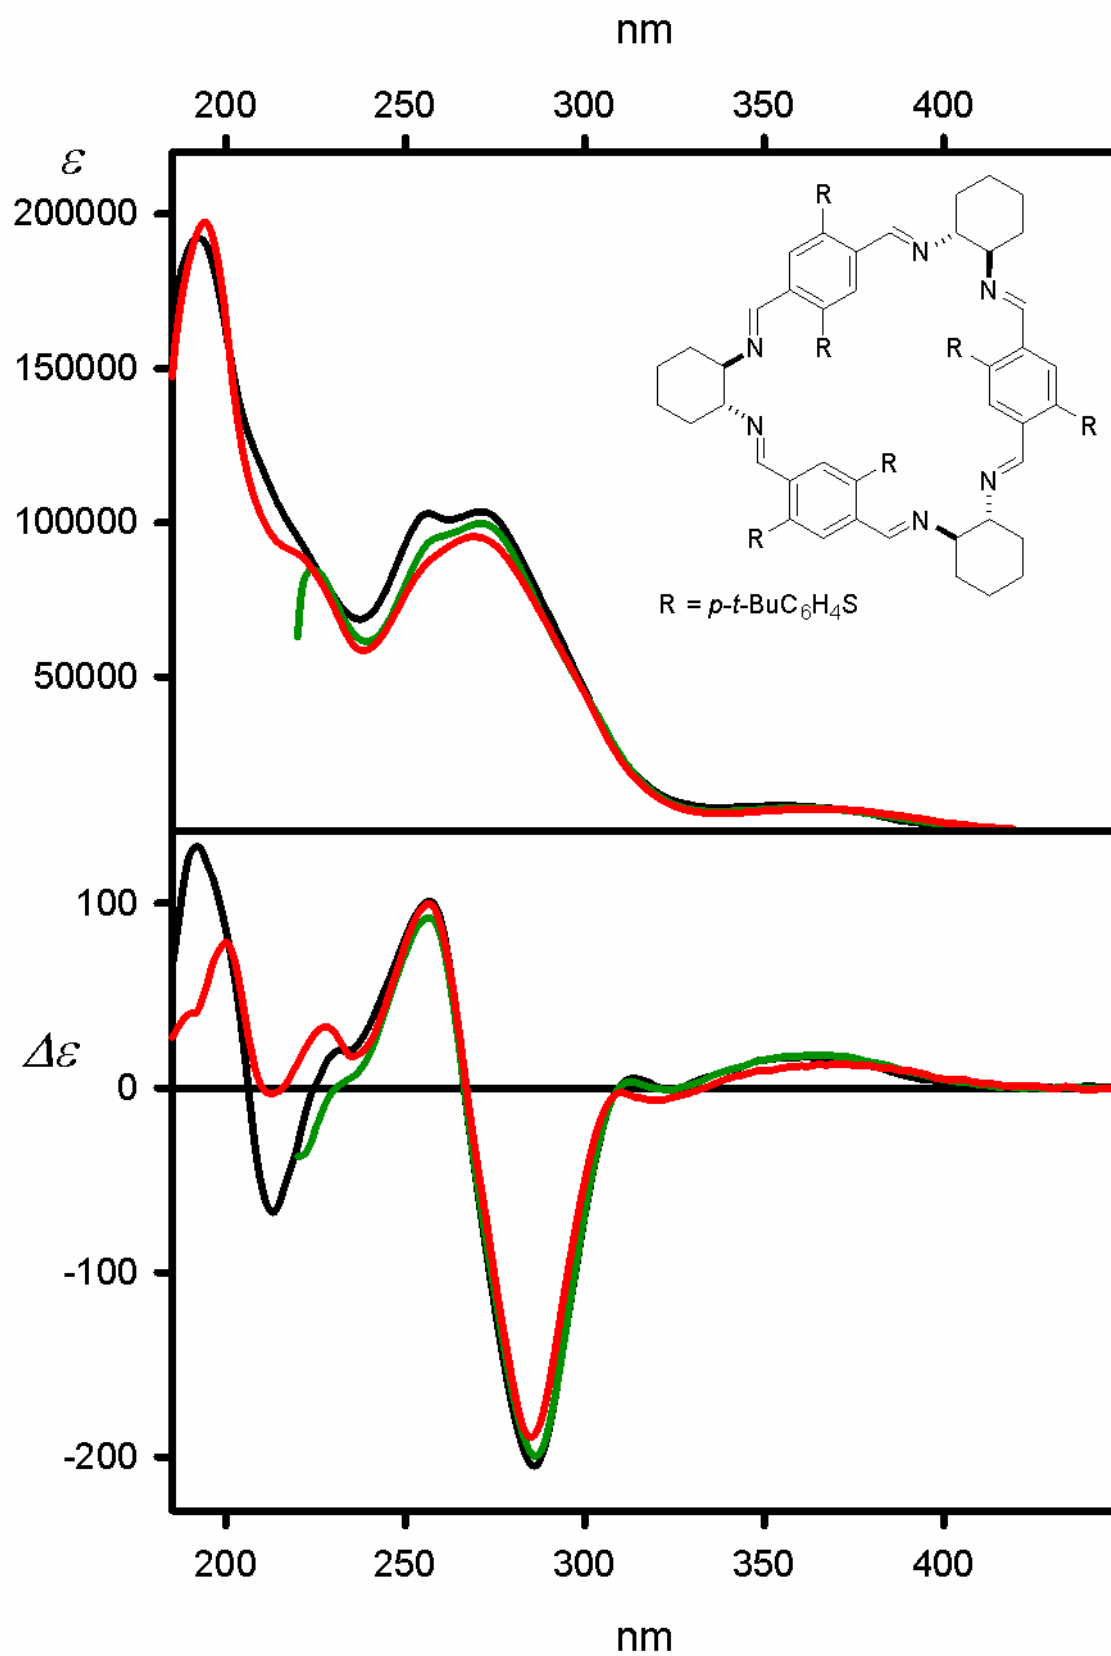

**Figure S3.** UV (upper panel) and ECD (lower panel) spectra of triaglimine **6c**, measured in cyclohexane (black lines), dichloromethane (dark-green lines), and acetonitrile (red lines).

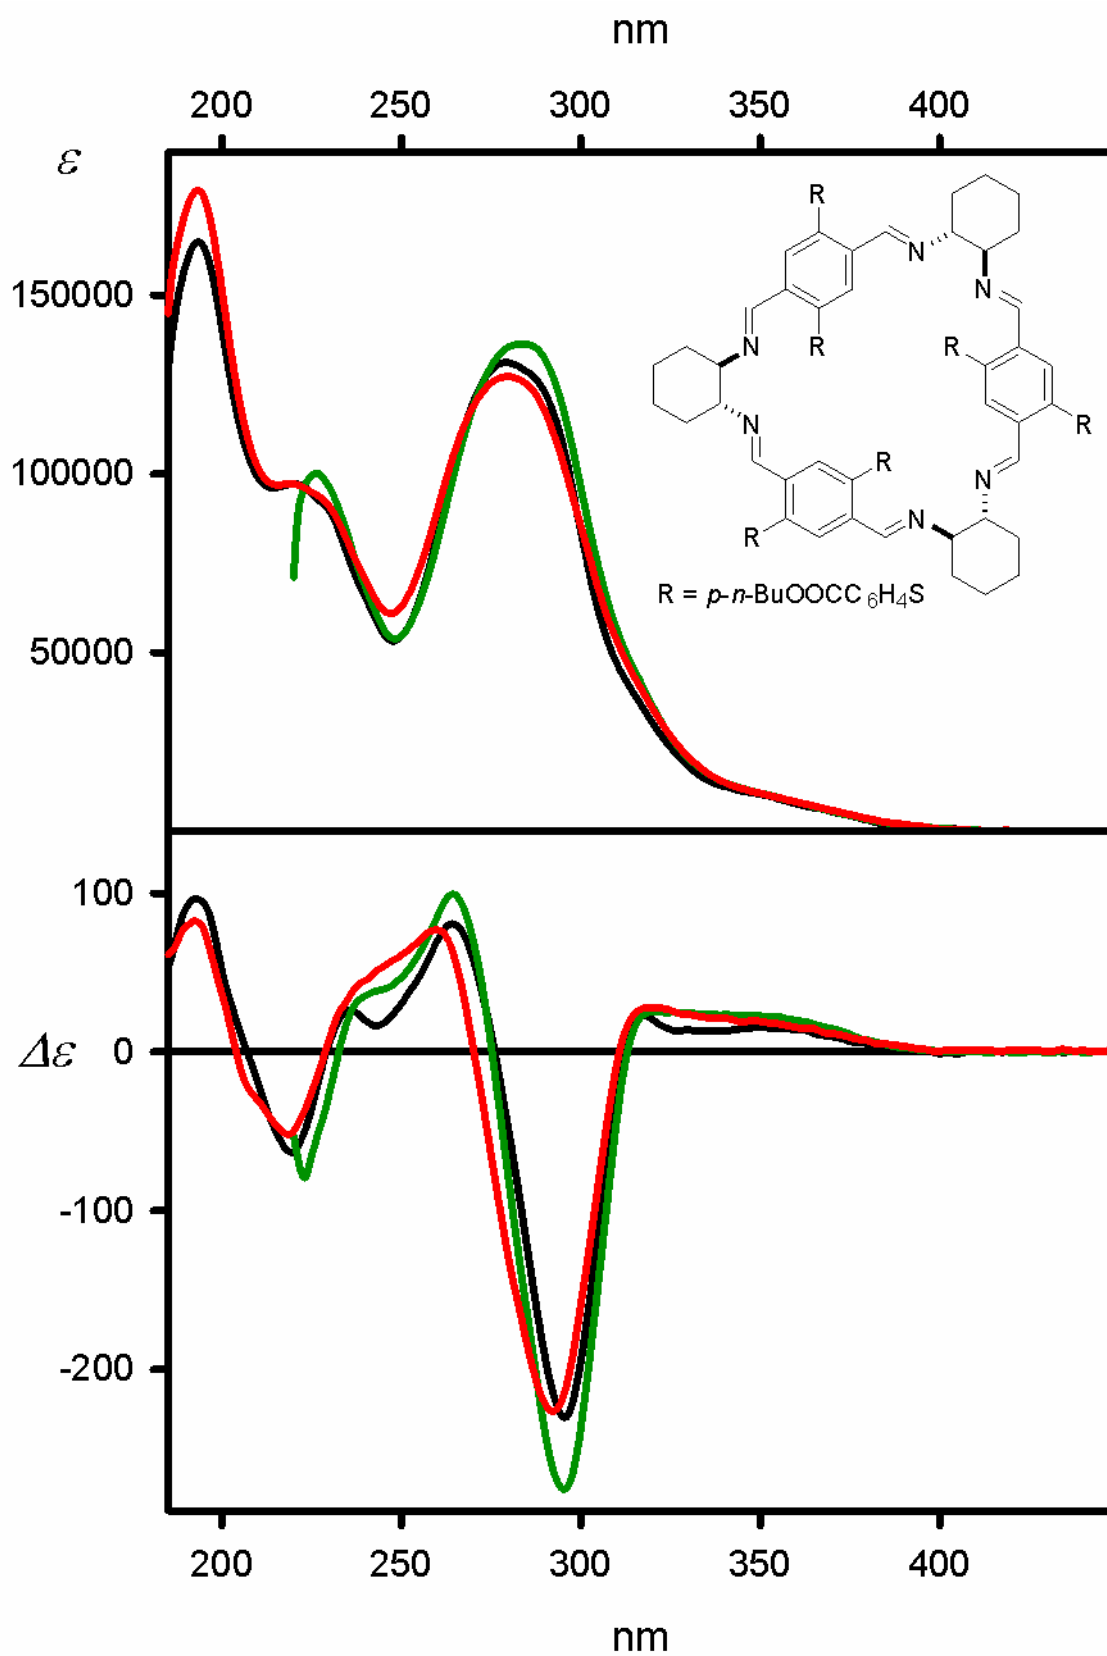

**Figure S4.** UV (upper panel) and ECD (lower panel) spectra of trianglimine **6d**, measured in cyclohexane (black lines), dichloromethane (dark-green lines), and acetonitrile (red lines).

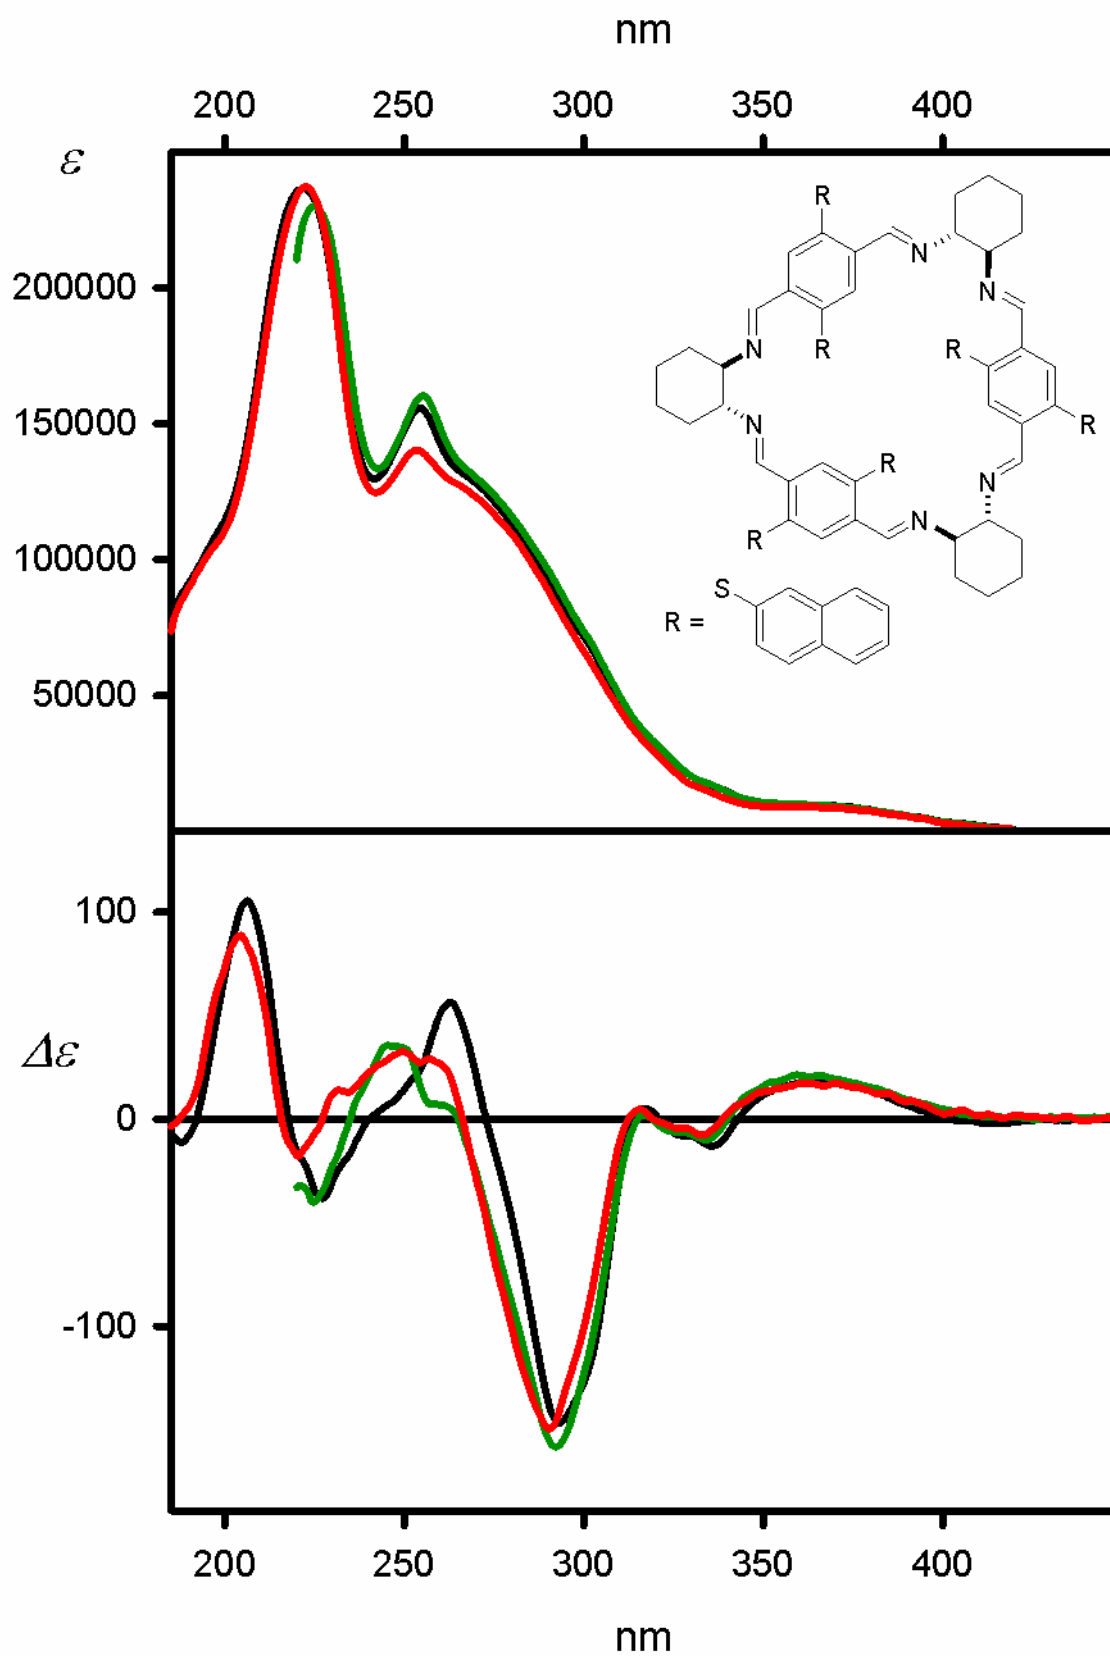

**Figure S5.** UV (upper panel) and ECD (lower panel) spectra of trianglimine **6e**, measured in cyclohexane (black lines), dichloromethane (dark-green lines), and acetonitrile (red lines).

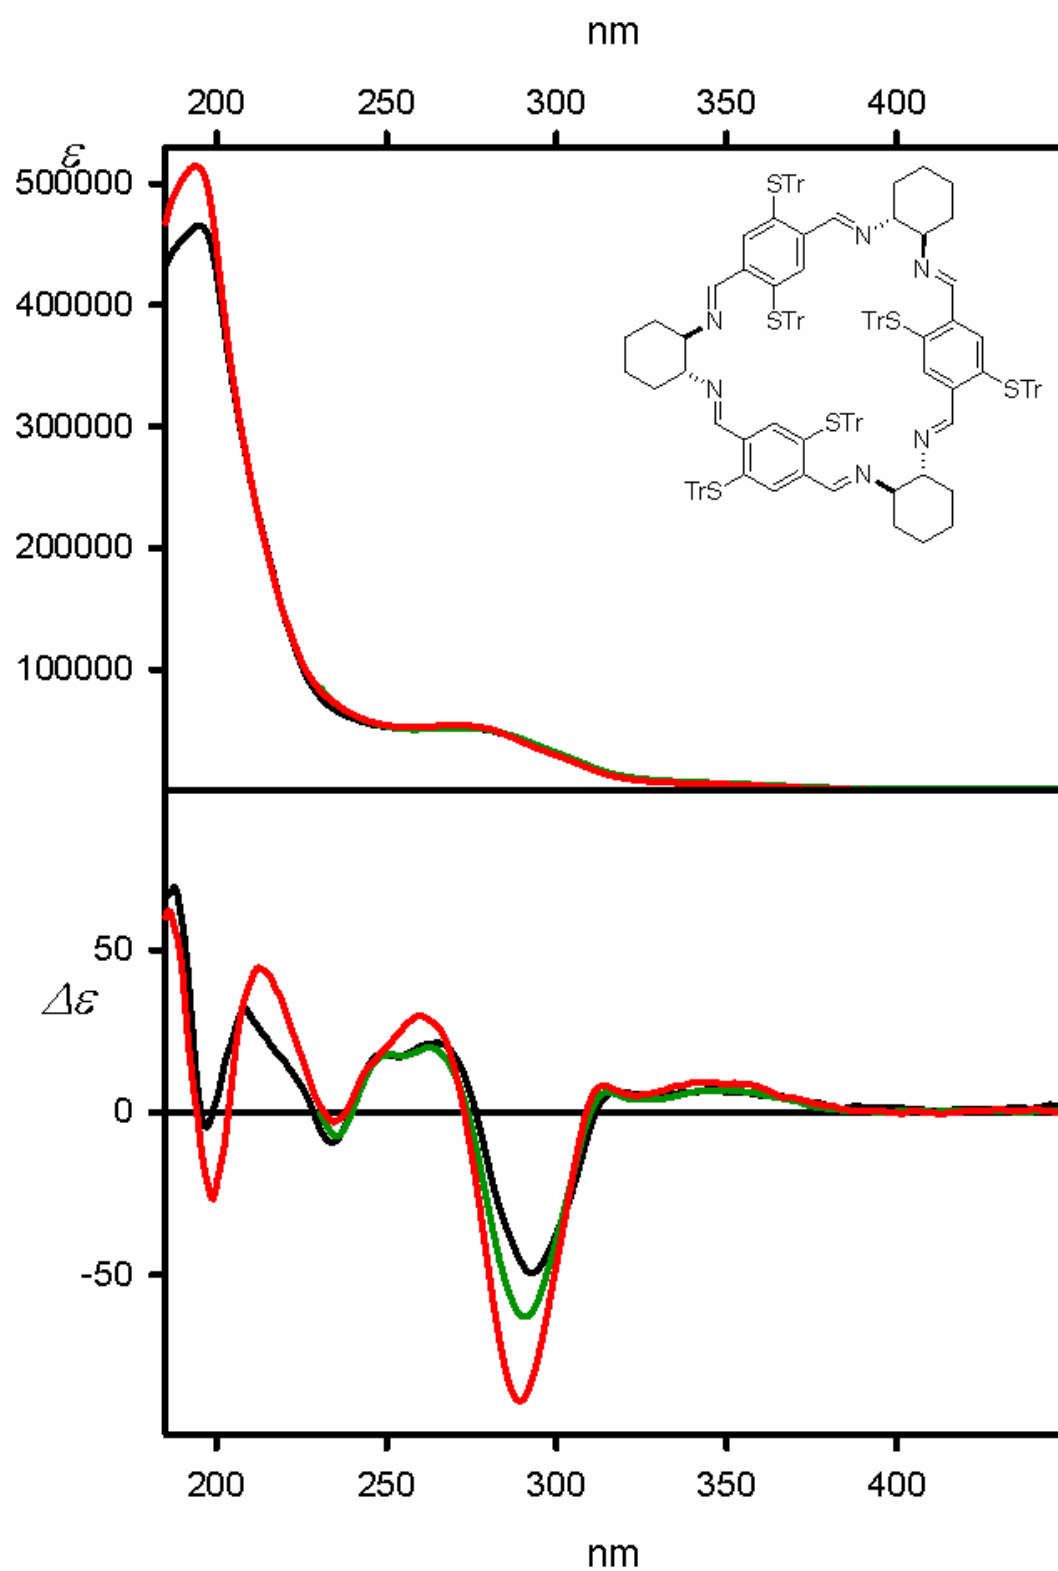



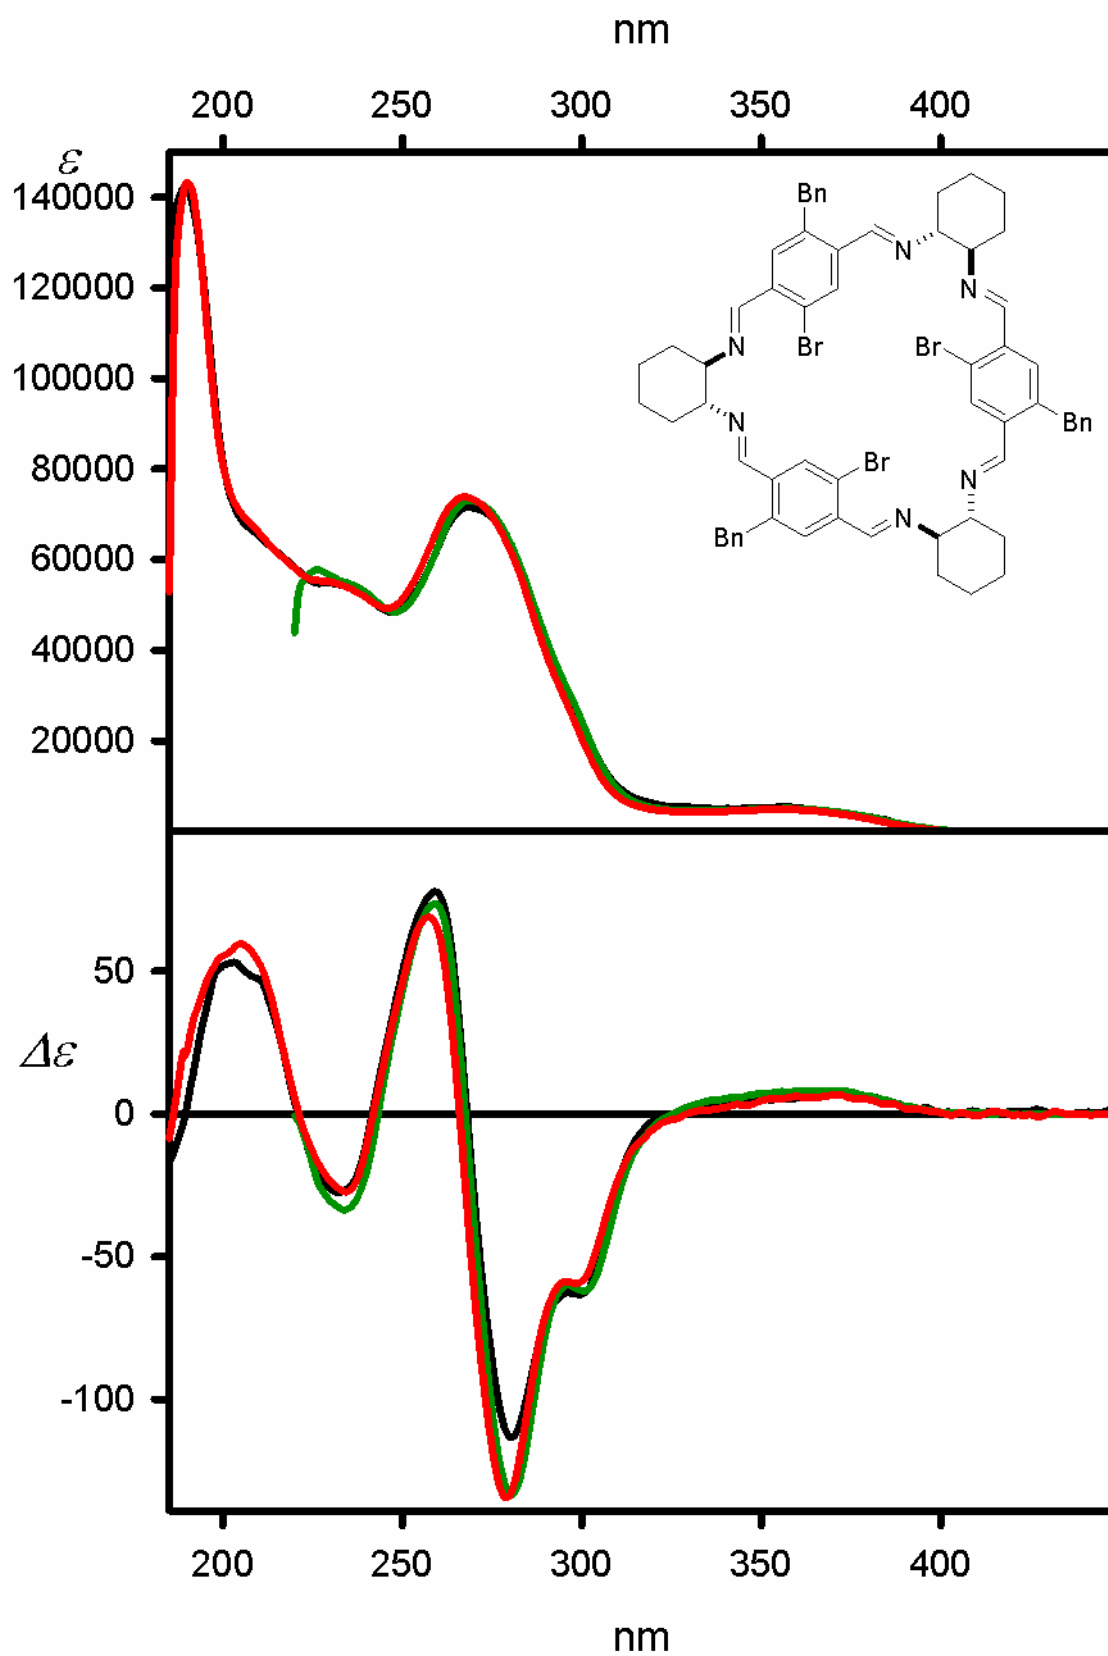

**Figure S7.** UV (upper panel) and ECD (lower panel) spectra of trianglimine **6g**, measured in cyclohexane (black lines), dichloromethane (dark-green lines), and acetonitrile (red lines).

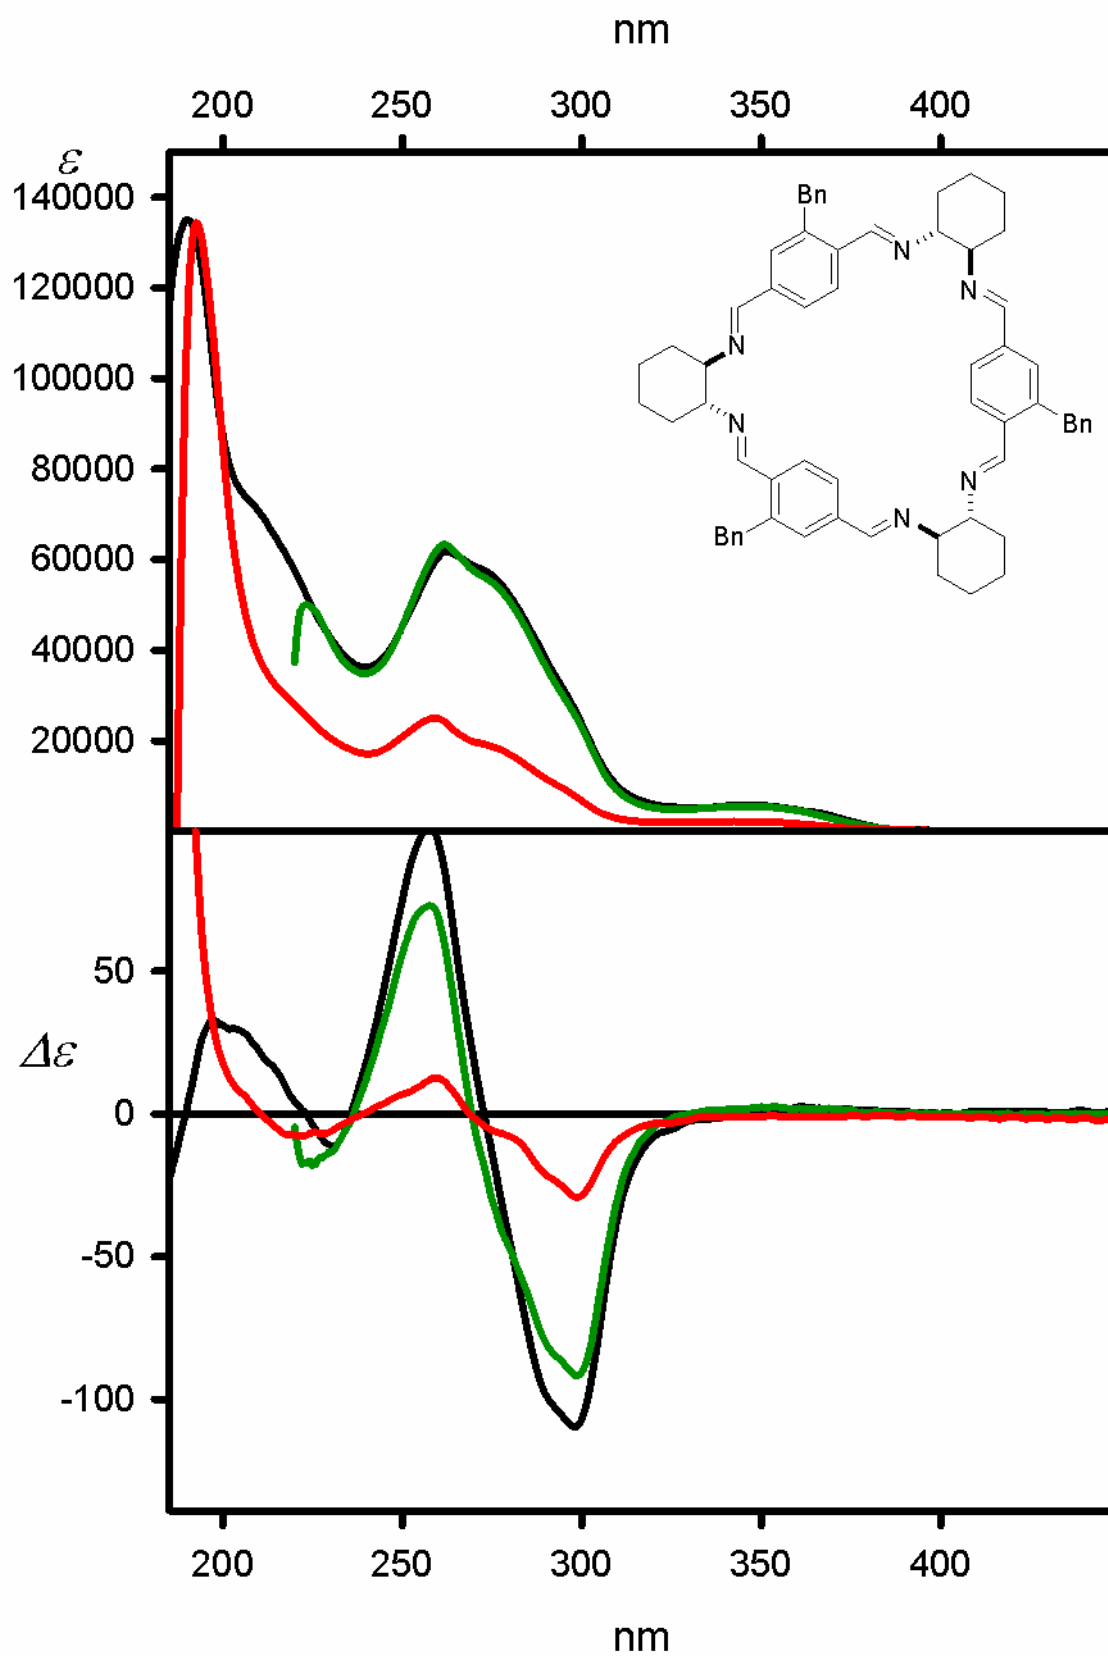

**Figure S8.** UV (upper panel) and ECD (lower panel) spectra of trianglimine **6h**, measured in cyclohexane (black lines), dichloromethane (dark-green lines), and acetonitrile (red lines).

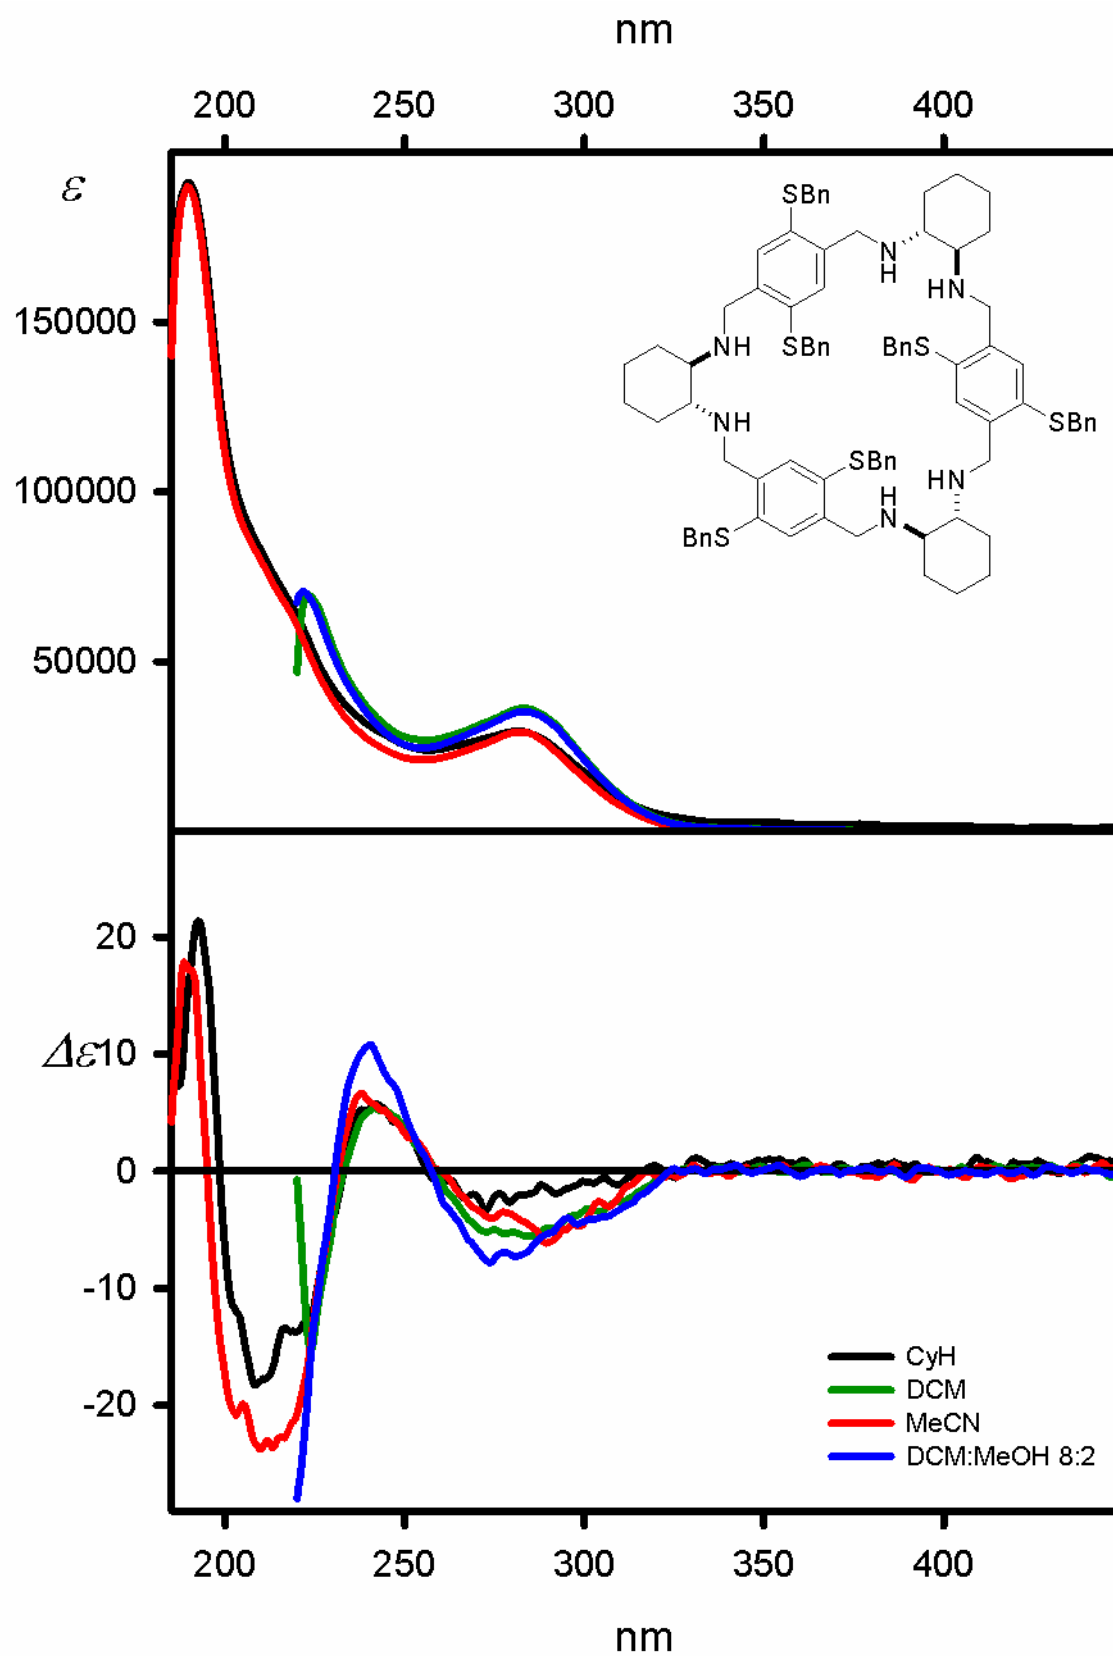

**Figure S9.** UV (upper panel) and ECD (lower panel) spectra of triamine **7**, measured in cyclohexane (black lines), dichloromethane (dark-green lines), acetonitrile (red lines), and dichloromethane containing 20% of methanol (blue lines).

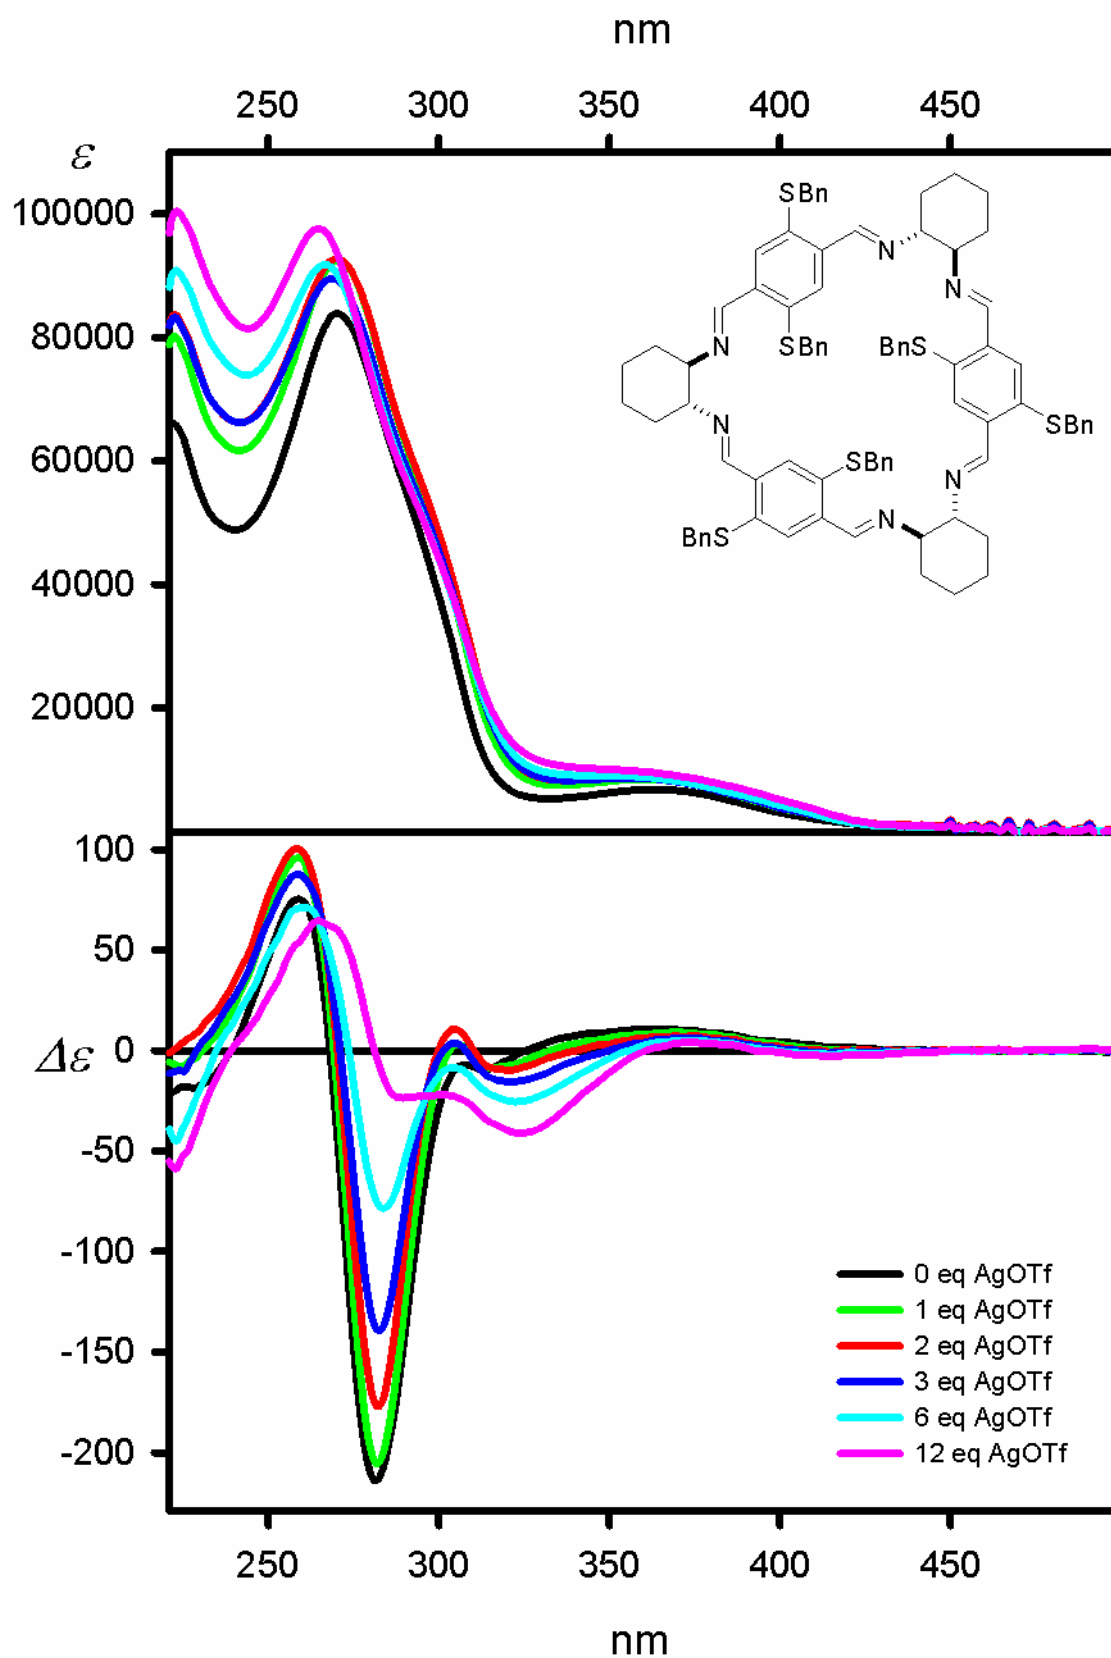

**Figure S10.** UV (upper panel) and ECD (lower panel) spectra measured during the titration of trianglimine **6a** with AgOTf. Spectra were measured in dichloromethane containing 20% of methanol.

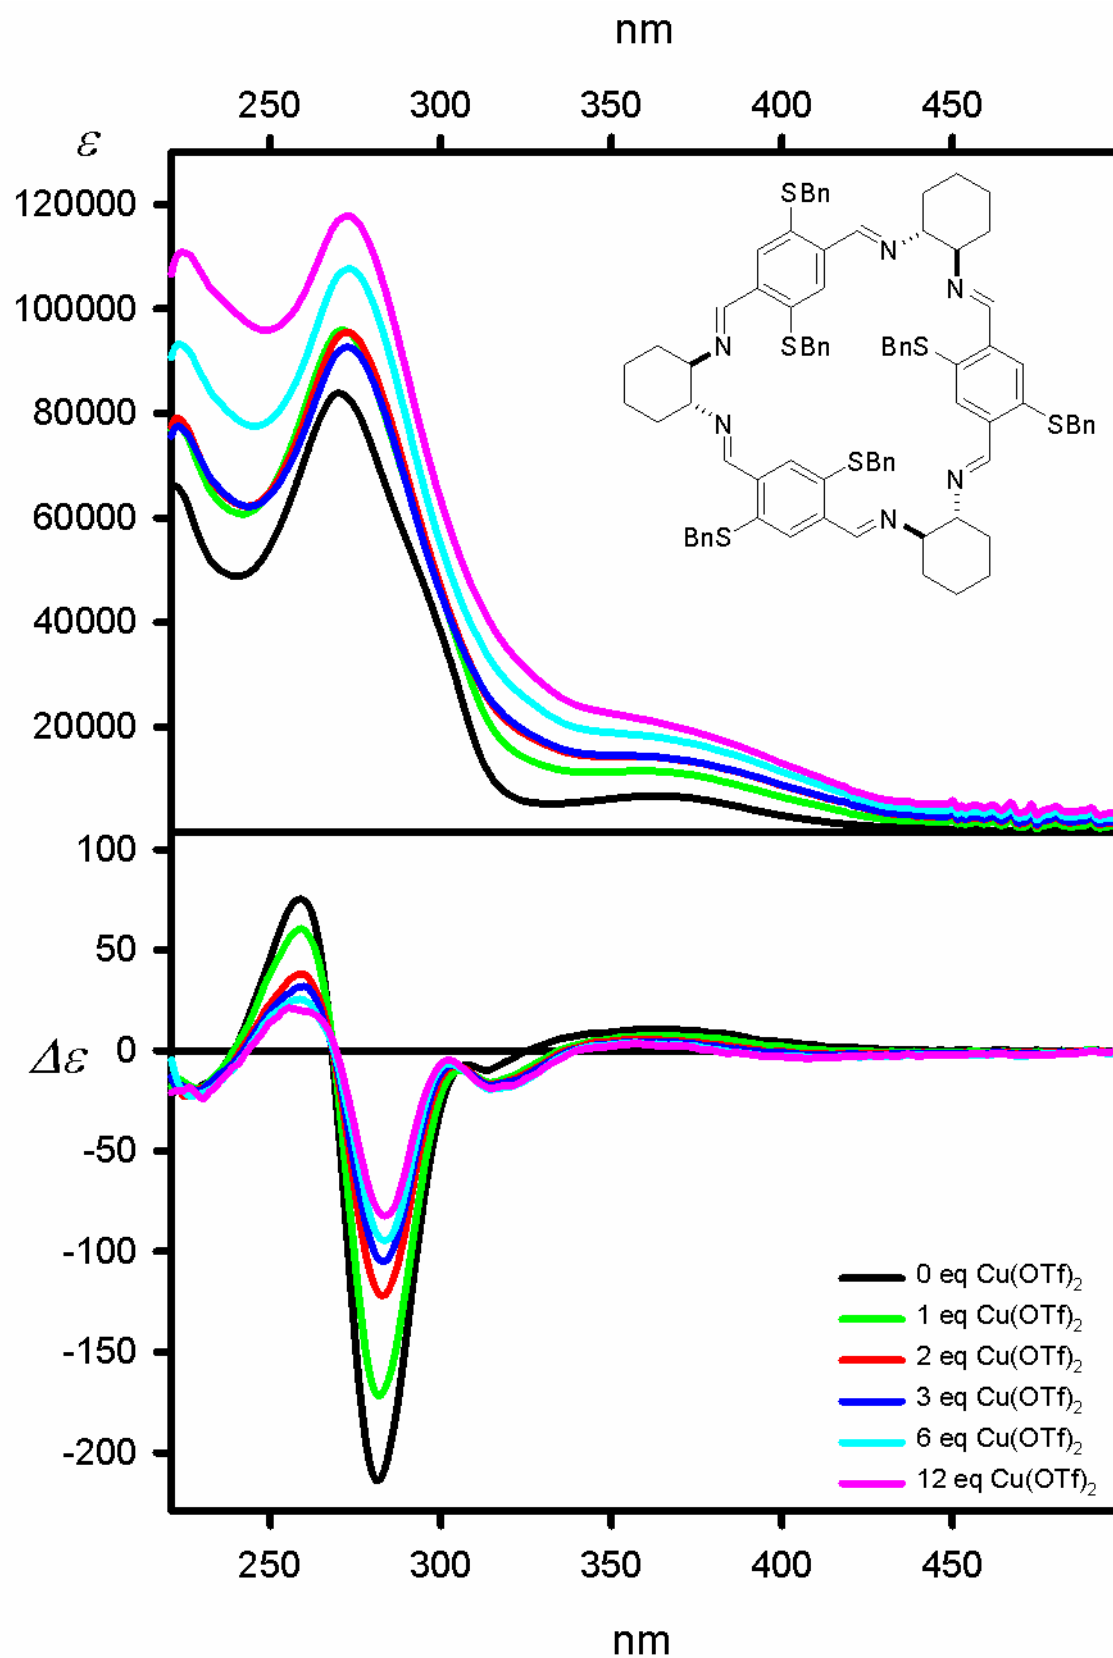

**Figure S11.** UV (upper panel) and ECD (lower panel) spectra measured during the titration of trianglimine **6a** with  $\text{Cu}(\text{OTf})_2 \cdot \text{C}_6\text{H}_6$ . Spectra were measured in dichloromethane containing 20% of methanol.

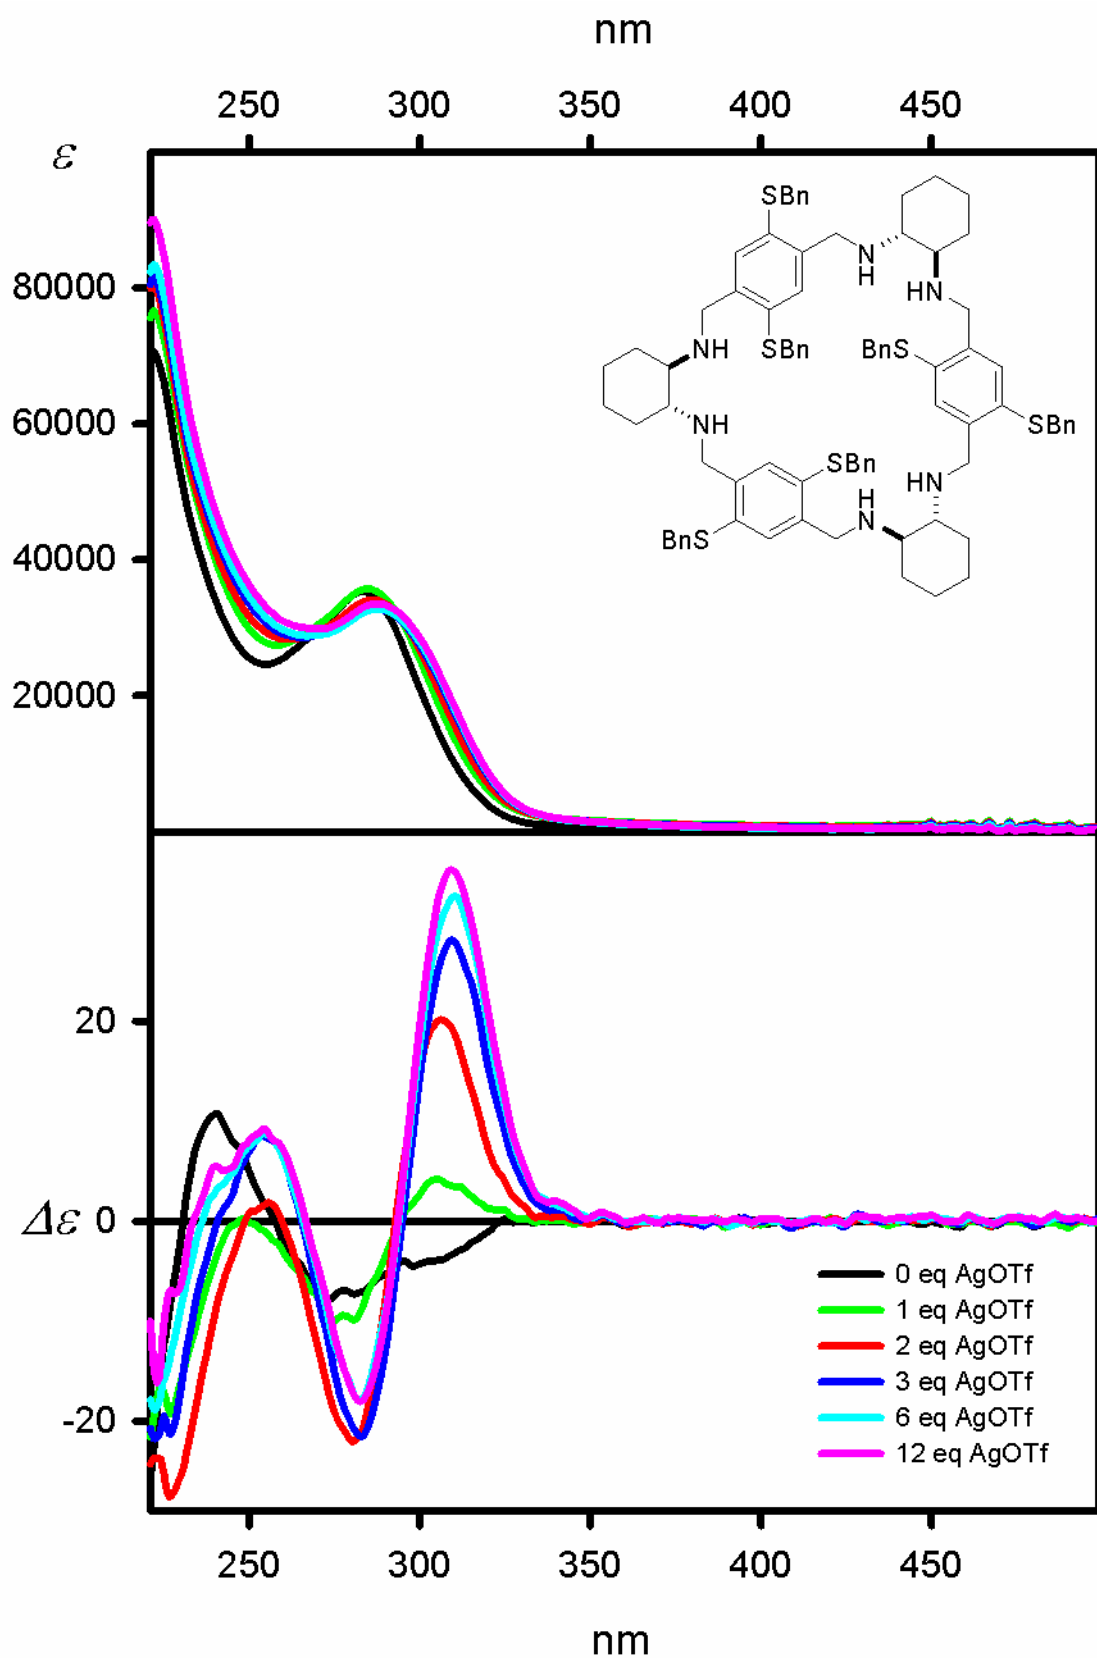

**Figure S12.** UV (upper panel) and ECD (lower panel) spectra measured during the titration of triamine **7** with AgOTf. Spectra were measured in dichloromethane containing 20% of methanol.

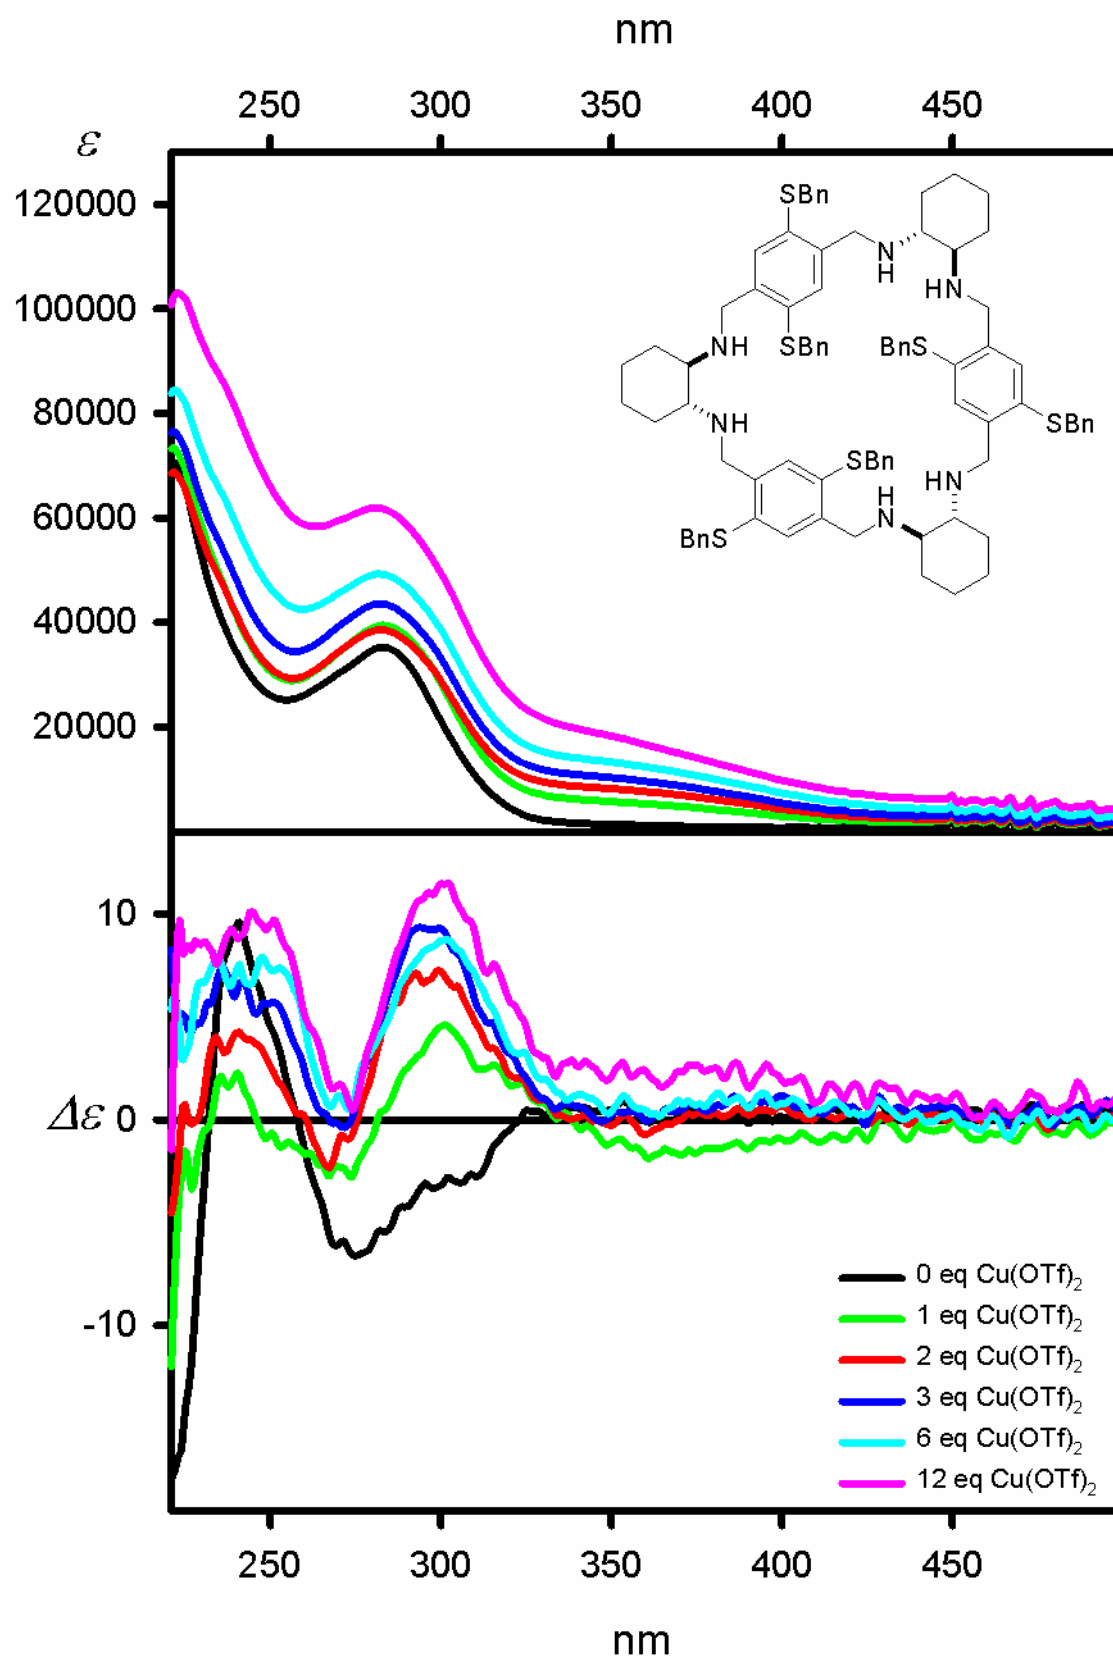

**Figure S13.** UV (upper panel) and ECD (lower panel) spectra measured during the titration of triallamine **7** with  $\text{Cu}(\text{OTf})_2 \cdot \text{C}_6\text{H}_6$ . Spectra were measured in dichloromethane containing 20% of methanol.

### 3 Calculation details

The theoretical approach that has been used in this work is common to all studied structures and includes (i) conformational search at molecular mechanics level (MM3); (ii) pre-optimization at the B3LYP/6-31G(d) level to reduce the number of thermally accessible conformers; (iii) parallel re-optimization of conformers found at the low-DFT level with the use of B3LYP hybrid functional, its modifications B3LYP-GD3BJ, which include the D3 version of Grimme's dispersion with Becke-Johnson damping, and Truhlar's pure functional M06L in the gas phase, followed by frequency calculations to confirm stability of received structures; (iv) calculations on relative energies using Boltzmann distribution at  $T = 298.15$  K; (v) rotatory strengths calculations at the TD-DFT level for all stable conformers of relative energies ranging from 0.0 to 2.0 kcal mol<sup>-1</sup>.

The preliminary conformer distribution search was performed by the Scigress package [2] using the MM3 molecular mechanics force field for the macrocycle **6a**, **6c**, **6h**, **6g**, and the most challenging example, **6f**, molecules all with the assumed *R* configuration at the stereogenic centers. The possible conformers were analyzed using the systematic search methodology. Minimum energy conformers of relative steric energies ( $\Delta E_{SE}$ ) up to 10 kcal mol<sup>-1</sup> found by molecular mechanics were further fully optimized at the B3LYP/6-31G(d) level as implemented in the Gaussian16 package,[3,4] which significantly reduced the number of conformers. Higher accuracy calculations were performed at the B3LYP, B3LYP-GD3BJ, and M06L levels.[4-6] The conformers obtained at the DFT level were the real minima (no imaginary frequencies have been found). Total and free energy values have been calculated and used to get the Boltzmann population of conformers at 298.15 K. Only the results for conformers that differ from the most stable one by less than 2 kcal mol<sup>-1</sup> were considered for further calculations, following a generally accepted protocol [7,8]. The TD-DFT calculations of ECD were performed for all structures re-optimized at higher levels of theory. We used three different density functionals to calculate rotatory strengths, namely CAM-B3LYP [9], M06-2X [6], and  $\omega$ B97XD functional.[10] Rotatory strengths were calculated using both length and velocity representations. In the present study, the differences between the length and velocity representations of the computed values of rotatory strengths were relatively small, so only the velocity representations were used further. The CD spectra were simulated by overlapping Gaussian functions for each transition according to the procedure previously described. [8,11] It should be noted that there are no substantial differences between ECD spectra calculated with these three functionals for the same molecule.

#### 3.1 Computational data

**Table S2** Total ( $E$ , in Hartree) and relative energies ( $\Delta E$ ,  $\Delta \Delta G$ , in kcal mol<sup>-1</sup>), percentage populations (Pop.) and number of imaginary frequencies calculated at the B3LYP/6-311G(d,p) level for low-energy conformers of **6a**.

| Conformer <sup>a</sup> | $E$         | $\Delta E$ | Pop.  | $\Delta \Delta G$ | Pop.  | #ImFreq |
|------------------------|-------------|------------|-------|-------------------|-------|---------|
| 16                     | -5970.18125 | 0.58       | 6.56  | 3.59              |       | 0       |
| 20                     | -5970.17912 | 1.92       | 0.68  | 2                 |       | 0       |
| 22                     | -5970.1795  | 1.68       | 1.03  | 2.34              |       | 0       |
| 27                     | -5970.18057 | 1.01       | 3.17  | 2.23              |       | 0       |
| 31                     | -5970.17905 | 1.96       | 0.64  | 3.07              |       | 0       |
| 39                     | -5970.18186 | 0.2        | 12.53 | 2.51              |       | 0       |
| 43                     | -5970.18013 | 1.28       | 2     | 0.41              | 16.69 | 0       |
| 49                     | -5970.17948 | 1.7        | 1     | 4.42              |       | 0       |
| 50.                    | -5970.18218 | 0          | 17.5  | 3.02              |       | 0       |
| 63                     | -5970.18076 | 0.89       | 3.91  | 0.68              | 10.52 | 0       |
| 68                     | -5970.18052 | 1.04       | 3.02  | 1.79              | 1.62  | 0       |
| 72                     | -5970.1818  | 0.24       | 11.73 | 0.84              | 8.11  | 0       |
| 73                     | -5970.17965 | 1.59       | 1.2   | 2.27              |       | 0       |
| 74                     | -5970.1818  | 0.24       | 11.66 | 0.49              | 14.64 | 0       |
| 75                     | -5970.18012 | 1.29       | 1.98  | 5.04              |       | 0       |
| 76                     | -5970.18043 | 1.09       | 2.75  | 1.11              | 5.11  | 0       |
| 83                     | -5970.18001 | 1.36       | 1.76  | 4.39              |       | 0       |
| 86                     | -5970.1814  | 0.49       | 7.66  | 0.95              | 6.75  | 0       |
| 91                     | -5970.18113 | 0.66       | 5.76  | 0                 | 33.38 | 0       |
| 92                     | -5970.17988 | 1.44       | 1.54  | 2.73              |       | 0       |
| 97                     | -5970.18009 | 1.31       | 1.91  | 1.39              | 3.17  | 0       |

[a] conformers are numbered according to their appearance during conformational search



**Table S3.** Total ( $E$ , in Hartree) and relative energies ( $\Delta E$ ,  $\Delta\Delta G$ , in kcal mol<sup>-1</sup>), percentage populations (Pop.) and number of imaginary frequencies calculated at the B3LYP-GD3BJ/6-311G(d,p) level for low-energy conformers of **6a**.

| Conformer <sup>a</sup> | $E$         | $\Delta E$ | Pop.  | $\Delta\Delta G$ | Pop.  | #ImFreq |
|------------------------|-------------|------------|-------|------------------|-------|---------|
| 32                     | -5970.71602 | 0.93       | 8.8   | 3.15             |       | 0       |
| 53                     | -5970.71611 | 0.88       | 9.68  | 4.29             |       | 0       |
| 60                     | -5970.71742 | 0.05       | 38.89 | 0                | 85.35 | 0       |
| 93                     | -5970.71751 | 0          | 42.63 | 1.04             | 14.65 | 0       |

[a] conformers are numbered according to their appearance during conformational search

**Table S4.** Total ( $E$ , in Hartree) and relative energies ( $\Delta E$ ,  $\Delta\Delta G$ , in kcal mol<sup>-1</sup>), percentage populations (Pop.) and number of imaginary frequencies calculated at the M06L/6-311G(d,p) level for low-energy conformers of **6a**.

| Conformer <sup>a</sup> | $E$         | $\Delta E$ | Pop.  | $\Delta\Delta G$ | Pop.  | #ImFreq |
|------------------------|-------------|------------|-------|------------------|-------|---------|
| 5                      | -5969.63595 | 2.13       |       | 1.75             | 3.49  | 0       |
| 7                      | -5969.63608 | 2.05       |       | 1.99             | 2.34  | 0       |
| 32                     | -5969.63584 | 2.2        |       | 0.67             | 21.77 | 0       |
| 53                     | -5969.63703 | 1.45       | 6     | 4.06             |       | 0       |
| 60                     | -5969.63836 | 0.62       | 24.43 | 0                | 67.15 | 0       |
| 81                     | -5969.63934 | 0          | 69.56 | 2.17             |       | 0       |
| 82                     | -5969.63561 | 2.34       |       | 1.51             | 5.26  | 0       |

[a] conformers are numbered according to their appearance during conformational search

**Table S5.** Total ( $E$ , in Hartree) and relative energies ( $\Delta E$ ,  $\Delta\Delta G$ , in kcal mol<sup>-1</sup>), percentage populations (Pop.) and number of imaginary frequencies calculated at the B3LYP/6-31G(d,p) level for low-energy conformers of **6c**.

| Conformer <sup>a</sup> | $E$         | $\Delta E$ | Pop.  | $\Delta\Delta G$ | Pop.  | #ImFreq |
|------------------------|-------------|------------|-------|------------------|-------|---------|
| 15                     | -6676.98863 | 0.55       | 7.44  | 0.85             | 5.54  | 0       |
| 18                     | -6676.98728 | 1.4        | 1.77  | 0.41             | 11.72 | 0       |
| 20                     | -6676.98914 | 0.23       | 12.81 | 2.48             |       | 0       |
| 25                     | -6676.98674 | 1.74       | 1.01  | 1.76             | 1.2   | 0       |
| 26                     | -6676.98734 | 1.36       | 1.91  | 0                | 23.26 | 0       |
| 27                     | -6676.98733 | 1.37       | 1.87  | 0.29             | 14.36 | 0       |
| 29                     | -6676.98739 | 1.33       | 2     | 1.28             | 2.68  | 0       |
| 30                     | -6676.9885  | 0.63       | 6.48  | 0.27             | 14.62 | 0       |
| 31                     | -6676.98745 | 1.29       | 2.13  | 1.63             | 1.48  | 0       |
| 38                     | -6676.98743 | 1.31       | 2.08  | 2.35             |       | 0       |
| 40                     | -6676.98742 | 1.31       | 2.06  | 1.73             | 1.25  | 0       |
| 42                     | -6676.9874  | 1.32       | 2.02  | 1.66             | 1.4   | 0       |
| 46                     | -6676.98785 | 1.04       | 3.27  | 2.06             |       | 0       |
| 47                     | -6676.98809 | 0.89       | 4.19  | 2.77             |       | 0       |
| 48                     | -6676.98557 | 2.47       |       | 1.79             | 1.13  | 0       |
| 49                     | -6676.98554 | 2.49       |       | 1.76             | 1.18  | 0       |
| 53                     | -6676.98697 | 1.59       | 1.28  | 1.24             | 2.88  | 0       |
| 61                     | -6676.98788 | 1.02       | 3.36  | 1.95             | 0.87  | 0       |
| 71                     | -6676.98812 | 0.87       | 4.36  | 1.66             | 1.42  | 0       |
| 77                     | -6676.98612 | 2.13       |       | 1.98             | 0.82  | 0       |
| 78                     | -6676.9892  | 0.19       | 13.69 | 2.32             |       | 0       |
| 79                     | -6676.98847 | 0.65       | 6.32  | 1.84             | 1.04  | 0       |
| 80                     | -6676.98951 | 0          | 18.94 | 1.92             | 0.91  | 0       |
| 82                     | -6676.98542 | 2.56       |       | 1.22             | 2.95  | 0       |
| 84                     | -6676.98544 | 2.55       |       | 1.05             | 3.96  | 0       |
| 86                     | -6676.98433 | 3.25       |       | 1.8              | 1.11  | 0       |
| 90                     | -6676.98672 | 1.75       | 0.98  | 4.6              |       | 0       |
| 92                     | -6676.98536 | 2.6        |       | 1.01             | 4.21  | 0       |

[a] conformers are numbered according to their appearance during conformational search

**Table S6.** Total ( $E$ , in Hartree) and relative energies ( $\Delta E$ ,  $\Delta\Delta G$ , in kcal mol<sup>-1</sup>), percentage populations (Pop.) and number of imaginary frequencies calculated at the B3LYP-GD3BJ/6-31G(d,p) level for low-energy conformers of **6c**.

| Conformer <sup>a</sup> | $E$         | $\Delta E$ | Pop.  | $\Delta\Delta G$ | Pop.  | #ImFreq |
|------------------------|-------------|------------|-------|------------------|-------|---------|
| 59                     | -6677.65174 | 1.79       | 3.3   | 1.2              | 10.1  | 0       |
| 65                     | -6677.6534  | 0.75       | 19.2  | 1.6              | 5.15  | 0       |
| 85                     | -6677.6546  | 0          | 68.28 | 0                | 76.77 | 0       |
| 93                     | -6677.65271 | 1.19       | 9.22  | 1.34             | 7.98  | 0       |

[a] conformers are numbered according to their appearance during conformational search

**Table S7.** Total ( $E$ , in Hartree) and relative energies ( $\Delta E$ ,  $\Delta\Delta G$ , in kcal mol<sup>-1</sup>), percentage populations (Pop.) and number of imaginary frequencies calculated at the M06L/6-31G(d,p) level for low-energy conformers of **6c**.

| Conformer <sup>a</sup> | $E$         | $\Delta E$ | Pop.  | $\Delta\Delta G$ | Pop.  | #ImFreq |
|------------------------|-------------|------------|-------|------------------|-------|---------|
| 3                      | -6676.40442 | 1.17       | 3.64  | 5.65             |       | 0       |
| 4                      | -6676.40542 | 0.55       | 10.54 | 2.31             |       | 0       |
| 6                      | -6676.40419 | 1.32       | 2.85  | 0                | 51.3  | 0       |
| 7                      | -6676.40455 | 1.09       | 4.19  | 5.12             |       | 0       |
| 8                      | -6676.40357 | 1.71       | 1.49  | 2.25             |       | 0       |
| 13                     | -6676.40333 | 1.86       | 1.15  | 5.57             |       | 0       |
| 21                     | -6676.40482 | 0.92       | 5.6   | 3.95             |       | 0       |
| 37                     | -6676.40569 | 0.37       | 14.07 | 3.42             |       | 0       |
| 45                     | -6676.40398 | 1.45       | 2.29  | 0.69             | 15.99 | 0       |
| 64                     | -6676.40225 | 2.54       |       | 0.76             | 14.14 | 0       |
| 65                     | -6676.40629 | 0          | 26.47 | 5.38             |       | 0       |
| 70                     | -6676.40327 | 1.89       | 1.08  | 3.56             |       | 0       |
| 80                     | -6676.40446 | 1.15       | 3.8   | 2.07             |       | 0       |
| 99                     | -6676.40615 | 0.09       | 22.83 | 0.6              | 18.57 | 0       |

[a] conformers are numbered according to their appearance during conformational search

**Table S8.** Total ( $E$ , in Hartree) and relative energies ( $\Delta E$ ,  $\Delta\Delta G$ , in kcal mol<sup>-1</sup>), percentage populations (Pop.) and number of imaginary frequencies calculated at the B3LYP/6-31G(d) level for low-energy conformers of **6f**.

| Conformer <sup>a</sup> | $E$         | $\Delta E$ | Pop.  | $\Delta\Delta G$ | Pop.  | #ImFreq |
|------------------------|-------------|------------|-------|------------------|-------|---------|
| 8                      | -8741.6415  | 0          | 51.57 | 0.58             | 27.37 | 0       |
| 23                     | -8741.64144 | 0.04       | 48.43 | 0                | 72.63 | 0       |

[a] conformers are numbered according to their appearance during conformational search

**Table S9.** Total ( $E$ , in Hartree) and relative energies ( $\Delta E$ ,  $\Delta\Delta G$ , in kcal mol<sup>-1</sup>), percentage populations (Pop.) and number of imaginary frequencies calculated at the B3LYP-GD3BJ/6-31G(d) level for low-energy conformers of **6f**.

| Conformer <sup>a</sup> | $E$          | $\Delta E$ | Pop. | $\Delta\Delta G$ | Pop. | #ImFreq |
|------------------------|--------------|------------|------|------------------|------|---------|
| 23                     | -8742.673102 | 0          | 100  | 0                | 100  | 0       |

[a] conformers are numbered according to their appearance during conformational search

**Table S10.** Total ( $E$ , in Hartree) and relative energies ( $\Delta E$ ,  $\Delta\Delta G$ , in kcal mol<sup>-1</sup>), percentage populations (Pop.) and number of imaginary frequencies calculated at the M06L/6-31G(d) level for low-energy conformers of **6f**.

| Conformer <sup>a</sup> | $E$          | $\Delta E$ | Pop. | $\Delta\Delta G$ | Pop. | #ImFreq |
|------------------------|--------------|------------|------|------------------|------|---------|
| 23                     | -8740.873455 | 0          | 100  | 0                | 100  | 0       |

[a] conformers are numbered according to their appearance during conformational search

**Table S11.** Total ( $E$ , in Hartree) and relative energies ( $\Delta E$ ,  $\Delta\Delta G$ , in kcal mol<sup>-1</sup>), percentage populations (Pop.) and number of imaginary frequencies calculated at the B3LYP/6-311G(d,p) level for low-energy conformers of **6g**.

| Conformer <sup>a,b</sup> | $E$         | $\Delta E$ | Pop. | $\Delta\Delta G$ | Pop.  | #ImFreq |
|--------------------------|-------------|------------|------|------------------|-------|---------|
| sym_1                    | -11684.8833 | 1.02       | 1.2  | 3.57             |       | 0       |
| sym_29                   | -11684.8822 | 1.71       | 0.38 | 4.12             |       | 0       |
| sym_41                   | -11684.8841 | 0.48       | 3    | 4.05             |       | 0       |
| sym_67                   | -11684.8824 | 1.58       | 0.47 | 2.66             |       | 0       |
| sym_68                   | -11684.8822 | 1.68       | 0.4  | 4.01             |       | 0       |
| sym_74                   | -11684.8846 | 0.19       | 4.9  | 5.25             |       | 0       |
| sym_77                   | -11684.8822 | 1.71       | 0.38 | 3.81             |       | 0       |
| sym_87                   | -11684.8834 | 0.96       | 1.34 | 1.16             | 3.06  | 0       |
| sym_98                   | -11684.8834 | 0.97       | 1.33 | 1.49             | 1.78  | 0       |
| 2                        | -11684.8818 | 1.95       | 0.25 | 3.74             |       | 0       |
| 6                        | -11684.8847 | 0.12       | 5.56 | 0.3              | 13.23 | 0       |
| 8                        | -11684.8845 | 0.25       | 4.42 | 0.55             | 8.67  | 0       |
| 9                        | -11684.8829 | 1.26       | 0.81 | 3.59             |       | 0       |
| 10                       | -11684.8836 | 0.83       | 1.68 | 2.92             |       | 0       |
| 11                       | -11684.8849 | 0          | 6.79 | 0.43             | 10.61 | 0       |
| 12                       | -11684.8843 | 0.37       | 3.64 | 0                | 21.84 | 0       |
| 13                       | -11684.8844 | 0.29       | 4.13 | 1.19             | 2.93  | 0       |
| 14                       | -11684.8828 | 1.31       | 0.74 | 3.45             |       | 0       |
| 15.                      | -11684.8842 | 0.44       | 3.24 | 2.12             |       | 0       |
| 16                       | -11684.8827 | 1.37       | 0.67 | 3.59             |       | 0       |
| 17                       | -11684.8826 | 1.46       | 0.58 | 2.87             |       | 0       |
| 20                       | -11684.8823 | 1.64       | 0.42 | 4.96             |       | 0       |
| 22                       | -11684.8819 | 1.86       | 0.29 | 3.44             |       | 0       |
| 24                       | -11684.8822 | 1.69       | 0.39 | 3.77             |       | 0       |
| 25                       | -11684.8818 | 1.94       | 0.26 | 3.82             |       | 0       |
| 26                       | -11684.8824 | 1.57       | 0.48 | 5.04             |       | 0       |
| 27                       | -11684.883  | 1.18       | 0.92 | 3.05             |       | 0       |
| 28                       | -11684.8825 | 1.54       | 0.5  | 3.32             |       | 0       |
| 30                       | -11684.8823 | 1.65       | 0.42 | 3.77             |       | 0       |
| 31                       | -11684.8826 | 1.43       | 0.6  | 3.06             |       | 0       |
| 34                       | -11684.8831 | 1.11       | 1.04 | 3.85             |       | 0       |
| 36                       | -11684.8841 | 0.51       | 2.86 | 2.72             |       | 0       |
| 37                       | -11684.8819 | 1.88       | 0.28 | 3.15             |       | 0       |
| 40                       | -11684.8847 | 0.14       | 5.4  | 1.42             | 1.98  | 0       |
| 41                       | -11684.8824 | 1.55       | 0.5  | 2.9              |       | 0       |
| 44                       | -11684.8822 | 1.68       | 0.4  | 3.96             |       | 0       |
| 45                       | -11684.8829 | 1.24       | 0.83 | 3.19             |       | 0       |
| 46                       | -11684.882  | 1.8        | 0.32 | 3.75             |       | 0       |
| 48                       | -11684.8824 | 1.55       | 0.5  | 2.99             |       | 0       |
| 49                       | -11684.8837 | 0.78       | 1.82 | 2.02             |       | 0       |
| 52                       | -11684.883  | 1.2        | 0.9  | 3.4              |       | 0       |
| 53                       | -11684.8819 | 1.89       | 0.28 | 3.47             |       | 0       |
| 58                       | -11684.8819 | 1.88       | 0.29 | 2.83             |       | 0       |
| 59                       | -11684.8819 | 1.87       | 0.29 | 4.26             |       | 0       |
| 61                       | -11684.8841 | 0.49       | 2.96 | 2.06             |       | 0       |
| 62                       | -11684.8828 | 1.3        | 0.75 | 4.88             |       | 0       |
| 63                       | -11684.8833 | 0.99       | 1.28 | 3.11             |       | 0       |
| 64                       | -11684.8825 | 1.48       | 0.55 | 2.38             |       | 0       |
| 65                       | -11684.8848 | 0.08       | 5.97 | 1.37             | 2.14  | 0       |
| 66                       | -11684.8839 | 0.61       | 2.41 | 1.35             | 2.23  | 0       |
| 72                       | -11684.8838 | 0.7        | 2.1  | 2.27             |       | 0       |
| 73                       | -11684.8831 | 1.14       | 0.99 | 3.57             |       | 0       |
| 75                       | -11684.8838 | 0.72       | 2.02 | 2.27             |       | 0       |
| 76                       | -11684.882  | 1.82       | 0.31 | 3.98             |       | 0       |
| 77                       | -11684.8828 | 1.34       | 0.71 | 3.47             |       | 0       |
| 78                       | -11684.8844 | 0.32       | 3.96 | 0.42             | 10.68 | 0       |
| 79                       | -11684.8823 | 1.64       | 0.42 | 3.97             |       | 0       |
| 82                       | -11684.8824 | 1.57       | 0.48 | 3.59             |       | 0       |
| 83                       | -11684.882  | 1.81       | 0.32 | 3.92             |       | 0       |

|    |             |      |      |      |       |   |
|----|-------------|------|------|------|-------|---|
| 84 | -11684.8832 | 1.09 | 1.08 | 3.2  |       | 0 |
| 87 | -11684.8824 | 1.6  | 0.46 | 4.45 |       | 0 |
| 89 | -11684.8837 | 0.77 | 1.86 | 1.45 | 1.9   | 0 |
| 90 | -11684.882  | 1.8  | 0.33 | 4.3  |       | 0 |
| 92 | -11684.8841 | 0.53 | 2.77 | 0.4  | 11.06 | 0 |
| 94 | -11684.8828 | 1.3  | 0.75 | 1.89 | 0.9   | 0 |
| 95 | -11684.8836 | 0.85 | 1.62 | 0.67 | 7     | 0 |

[a] conformers are numbered according to their appearance during conformational search; [b] prefix "sym\_" denotes symmetrical conformer

**Table S12.** Total ( $E$ , in Hartree) and relative energies ( $\Delta E$ ,  $\Delta\Delta G$ , in kcal mol<sup>-1</sup>), percentage populations (Pop.) and number of imaginary frequencies calculated at the B3LYP-GD3BJ/6-311G(d,p) level for low-energy conformers of **6g**.

| Conformer <sup>a,b</sup> | $E$         | $\Delta E$ | Pop. | $\Delta\Delta G$ | Pop. | #ImFreq |
|--------------------------|-------------|------------|------|------------------|------|---------|
| sym_15                   | -11685.2862 | 3.15       |      | 1.52             | 5.14 | 0       |
| sym_66                   | -11685.2907 | 3.52       |      | 1.34             | 7    | 0       |
| 5                        | -11685.2849 | 2.82       |      | 1.16             | 9.49 | 0       |
| 7                        | -11685.2861 | 0          | 100  | 0                | 67.5 | 0       |
| 18                       | -11685.2862 | 3.64       |      | 1.43             | 6.05 | 0       |
| 22                       | -11685.2907 | 2.89       |      | 1.56             | 4.81 | 0       |

[a] conformers are numbered according to their appearance during conformational search; [b] prefix "sym\_" denotes symmetrical conformer

**Table S13.** Total ( $E$ , in Hartree) and relative energies ( $\Delta E$ ,  $\Delta\Delta G$ , in kcal mol<sup>-1</sup>), percentage populations (Pop.) and number of imaginary frequencies calculated at the M06L/6-311G(d,p) level for low-energy conformers of **6g**.

| Conformer <sup>a,b</sup> | $E$         | $\Delta E$ | Pop.  | $\Delta\Delta G$ | Pop.  | #ImFreq |
|--------------------------|-------------|------------|-------|------------------|-------|---------|
| sym_61.                  | -11684.1069 | 1.1        | 13.09 | 1.25             | 4.01  | 0       |
| 7                        | -11684.1087 | 0          | 83.51 | 0.23             | 22.5  | 0       |
| 8                        | -11684.1029 | 3.62       |       | 0.12             | 27.26 | 0       |
| 18                       | -11684.1045 | 2.63       |       | 1.11             | 5.12  | 0       |
| 22                       | -11684.1057 | 1.9        | 3.4   | 0                | 33.13 | 0       |
| 87                       | -11684.1039 | 2.98       |       | 1.87             | 1.42  | 0       |
| 90                       | -11684.1033 | 3.37       |       | 0.96             | 6.56  | 0       |

[a] conformers are numbered according to their appearance during conformational search; [b] prefix "sym\_" denotes symmetrical conformer

**Table S14.** Total ( $E$ , in Hartree) and relative energies ( $\Delta E$ ,  $\Delta\Delta G$ , in kcal mol<sup>-1</sup>), percentage populations (Pop.) and number of imaginary frequencies calculated at the B3LYP/6-311G(d,p) level for low-energy conformers of **6h**.

| Conformer <sup>a,b</sup> | $E$         | $\Delta E$ | Pop. | $\Delta\Delta G$ | Pop. | #ImFreq |
|--------------------------|-------------|------------|------|------------------|------|---------|
| sym_1                    | -3964.26719 | 1.38       | 0.75 | 2.22             |      | 0       |
| sym_29                   | -3964.26654 | 1.79       | 0.37 | 2.52             |      | 0       |
| sym_41                   | -3964.26913 | 0.16       | 5.85 | 3.19             |      | 0       |
| sym_45                   | -3964.26911 | 0.17       | 5.75 | 2.35             |      | 0       |
| sym_67                   | -3964.26651 | 1.81       | 0.36 | 1.3              | 1.26 | 0       |
| sym_68                   | -3964.26637 | 1.89       | 0.32 | 3.19             |      | 0       |
| sym_74                   | -3964.26795 | 0.9        | 1.67 | 3.4              |      | 0       |
| sym_77                   | -3964.26633 | 1.92       | 0.3  | 2.75             |      | 0       |
| sym_87                   | -3964.26704 | 1.47       | 0.64 | 0.59             | 4.18 | 0       |
| sym_98                   | -3964.26692 | 1.55       | 0.56 | 0.57             | 4.36 | 0       |
| 2                        | -3964.26688 | 1.58       | 0.54 | 3.27             |      | 0       |
| 6                        | -3964.26939 | 0          | 7.69 | 0.49             | 4.95 | 0       |
| 8                        | -3964.26825 | 0.71       | 2.31 | 0.26             | 7.28 | 0       |

|    |             |      |      |      |       |   |
|----|-------------|------|------|------|-------|---|
| 9  | -3964.26695 | 1.53 | 0.58 | 1.99 | 0.39  | 0 |
| 10 | -3964.2675  | 1.18 | 1.04 | 2.26 |       | 0 |
| 11 | -3964.26883 | 0.35 | 4.27 | 0.82 | 2.84  | 0 |
| 12 | -3964.26898 | 0.25 | 5.01 | 0.49 | 4.98  | 0 |
| 13 | -3964.26839 | 0.63 | 2.67 | 1.03 | 1.99  | 0 |
| 14 | -3964.26708 | 1.45 | 0.67 | 2.27 |       | 0 |
| 15 | -3964.26815 | 0.78 | 2.07 | 1.08 | 1.84  | 0 |
| 16 | -3964.26682 | 1.61 | 0.51 | 2.39 |       | 0 |
| 17 | -3964.26745 | 1.22 | 0.98 | 2    |       | 0 |
| 19 | -3964.26645 | 1.84 | 0.34 | 2.81 |       | 0 |
| 20 | -3964.26746 | 1.21 | 1    | 2.55 |       | 0 |
| 21 | -3964.26738 | 1.26 | 0.92 | 3.01 |       | 0 |
| 22 | -3964.26748 | 1.2  | 1.02 | 2.18 |       | 0 |
| 23 | -3964.26738 | 1.26 | 0.92 | 1.72 | 0.62  | 0 |
| 24 | -3964.2678  | 1    | 1.43 | 1.37 | 1.11  | 0 |
| 25 | -3964.26637 | 1.89 | 0.32 | 2.22 |       | 0 |
| 26 | -3964.26799 | 0.88 | 1.74 | 2.99 |       | 0 |
| 27 | -3964.26706 | 1.46 | 0.65 | 1.74 | 0.6   | 0 |
| 28 | -3964.26671 | 1.68 | 0.45 | 1.75 | 0.59  | 0 |
| 30 | -3964.26694 | 1.54 | 0.57 | 2.25 |       | 0 |
| 31 | -3964.26689 | 1.57 | 0.55 | 1.86 | 0.49  | 0 |
| 33 | -3964.26714 | 1.41 | 0.71 | 1.92 | 0.44  | 0 |
| 34 | -3964.26779 | 1    | 1.41 | 2.76 |       | 0 |
| 36 | -3964.26868 | 0.44 | 3.65 | 1.24 | 1.4   | 0 |
| 38 | -3964.26757 | 1.14 | 1.12 | 2.8  |       | 0 |
| 40 | -3964.26837 | 0.64 | 2.62 | 0.94 | 2.31  | 0 |
| 42 | -3964.26641 | 1.87 | 0.33 | 2.21 |       | 0 |
| 44 | -3964.26723 | 1.35 | 0.78 | 2.18 |       | 0 |
| 45 | -3964.26738 | 1.26 | 0.92 | 2.18 |       | 0 |
| 46 | -3964.26653 | 1.79 | 0.37 | 2.47 |       | 0 |
| 48 | -3964.26713 | 1.42 | 0.7  | 1.42 | 1.03  | 0 |
| 49 | -3964.26828 | 0.7  | 2.37 | 1.04 | 1.94  | 0 |
| 52 | -3964.26777 | 1.02 | 1.38 | 1.75 | 0.59  | 0 |
| 53 | -3964.26677 | 1.65 | 0.48 | 2.71 |       | 0 |
| 57 | -3964.26714 | 1.41 | 0.71 | 1.81 | 0.53  | 0 |
| 58 | -3964.26704 | 1.48 | 0.64 | 1.14 | 1.65  | 0 |
| 59 | -3964.26719 | 1.38 | 0.75 | 2.16 |       | 0 |
| 60 | -3964.26679 | 1.63 | 0.49 | 3.66 |       | 0 |
| 61 | -3964.26788 | 0.95 | 1.55 | 1.93 | 0.44  | 0 |
| 62 | -3964.26735 | 1.28 | 0.89 | 2.4  |       | 0 |
| 63 | -3964.26743 | 1.23 | 0.96 | 2.7  |       | 0 |
| 64 | -3964.26702 | 1.49 | 0.62 | 2.21 |       | 0 |
| 65 | -3964.26795 | 0.9  | 1.68 | 0.88 | 2.55  | 0 |
| 66 | -3964.2682  | 0.75 | 2.18 | 0.85 | 2.7   | 0 |
| 69 | -3964.26647 | 1.83 | 0.35 | 1.62 | 0.73  | 0 |
| 72 | -3964.26775 | 1.03 | 1.36 | 1.34 | 1.17  | 0 |
| 74 | -3964.26664 | 1.72 | 0.42 | 1.59 | 0.77  | 0 |
| 75 | -3964.26775 | 1.03 | 1.36 | 1.61 | 0.75  | 0 |
| 77 | -3964.26723 | 1.36 | 0.78 | 2.74 |       | 0 |
| 78 | -3964.26837 | 0.64 | 2.61 | 0.15 | 8.78  | 0 |
| 79 | -3964.26773 | 1.04 | 1.32 | 1.99 | 0.39  | 0 |
| 82 | -3964.26683 | 1.6  | 0.51 | 2.52 |       | 0 |
| 83 | -3964.26646 | 1.84 | 0.34 | 1.36 | 1.13  | 0 |
| 84 | -3964.26668 | 1.7  | 0.44 | 2.21 |       | 0 |
| 86 | -3964.26772 | 1.04 | 1.32 | 1.48 | 0.93  | 0 |
| 87 | -3964.26802 | 0.86 | 1.81 | 1.63 | 0.73  | 0 |
| 89 | -3964.26728 | 1.32 | 0.83 | 0.47 | 5.09  | 0 |
| 90 | -3964.26653 | 1.8  | 0.37 | 2.52 |       | 0 |
| 91 | -3964.26711 | 1.43 | 0.69 | 1.24 | 1.39  | 0 |
| 92 | -3964.26778 | 1.01 | 1.4  | 0.17 | 8.49  | 0 |
| 94 | -3964.26718 | 1.39 | 0.74 | 0.46 | 5.24  | 0 |
| 95 | -3964.26764 | 1.1  | 1.21 | 0    | 11.33 | 0 |

[a] conformers are numbered according to their appearance during conformational search; [b] prefix "sym\_" denotes symmetrical conformer

**Table S15.** Total ( $E$ , in Hartree) and relative energies ( $\Delta E$ ,  $\Delta\Delta G$ , in kcal mol<sup>-1</sup>), percentage populations (Pop.) and number of imaginary frequencies calculated at the B3LYP-GD3BJ/6-311G(d,p) level for low-energy conformers of **6h**.

| Conformer <sup>a,b</sup> | $E$         | $\Delta E$ | Pop. | $\Delta\Delta G$ | Pop.  | #ImFreq |
|--------------------------|-------------|------------|------|------------------|-------|---------|
| sym_15                   | -3964.64529 | 3.44       |      | 1.52             | 3.48  | 0       |
| sym_66                   | -3964.64431 | 4.05       |      | 1.45             | 3.87  | 0       |
| 2                        | -3964.65077 | 0          | 100  | 0                | 45.1  | 0       |
| 5                        | -3964.64463 | 3.85       |      | 1.19             | 6.07  | 0       |
| 6                        | -3964.64544 | 3.34       |      | 1.19             | 6     | 0       |
| 22                       | -3964.64613 | 2.91       |      | 1.25             | 5.43  | 0       |
| 79                       | -3964.64458 | 3.88       |      | 1                | 8.33  | 0       |
| 87                       | -3964.64616 | 2.89       |      | 0.54             | 18.13 | 0       |
| 98                       | -3964.64597 | 3.01       |      | 1.5              | 3.58  | 0       |

[a] conformers are numbered according to their appearance during conformational search; [b] prefix "sym\_" denotes symmetrical conformer

**Table S16.** Total ( $E$ , in Hartree) and relative energies ( $\Delta E$ ,  $\Delta\Delta G$ , in kcal mol<sup>-1</sup>), percentage populations (Pop.) and number of imaginary frequencies calculated at the M06L/6-311G(d,p) level for low-energy conformers of **6h**.

| Conformer <sup>a,b</sup> | $E$         | $\Delta E$ | Pop.  | $\Delta\Delta G$ | Pop.  | #ImFreq |
|--------------------------|-------------|------------|-------|------------------|-------|---------|
| sym_15                   | -3963.86447 | 1.95       | 0.84  | 1.98             | 2.09  | 0       |
| sym_61                   | -3963.86757 | 0          | 22.48 | 2.41             |       | 0       |
| 2                        | -3963.86602 | 0.97       | 4.36  | 0.77             | 16.3  | 0       |
| 5                        | -3963.86461 | 1.86       | 0.98  | 3.46             |       | 0       |
| 6                        | -3963.86651 | 0.67       | 7.28  | 1.34             | 6.17  | 0       |
| 7                        | -3963.86735 | 0.14       | 17.78 | 1.01             | 10.83 | 0       |
| 8                        | -3963.86325 | 2.71       |       | 1.77             | 2.97  | 0       |
| 20                       | -3963.86586 | 1.07       | 3.68  | 2.27             |       | 0       |
| 22                       | -3963.86653 | 0.65       | 7.47  | 2.33             |       | 0       |
| 60                       | -3963.86606 | 0.95       | 4.52  | 3.14             |       | 0       |
| 62                       | -3963.86584 | 1.09       | 3.58  | 0                | 59.5  | 0       |
| 79                       | -3963.86448 | 1.94       | 0.85  | 3.14             |       | 0       |
| 81                       | -3963.86461 | 1.86       | 0.98  | 4.12             |       | 0       |
| 87                       | -3963.8664  | 0.74       | 6.49  | 1.97             | 2.14  | 0       |
| 88                       | -3963.86532 | 1.41       | 2.08  | 3.58             |       | 0       |
| 98                       | -3963.86729 | 0.18       | 16.64 | 2.51             |       | 0       |

[a] conformers are numbered according to their appearance during conformational search; [b] prefix "sym\_" denotes symmetrical conformer

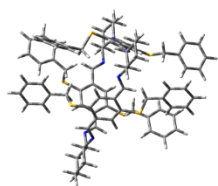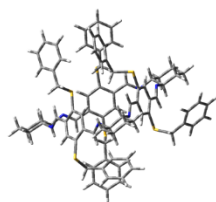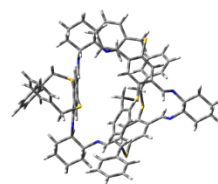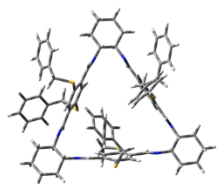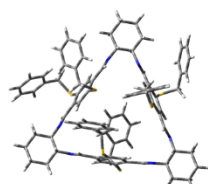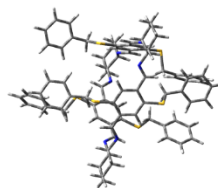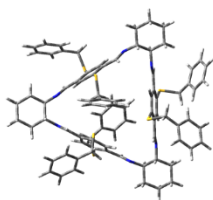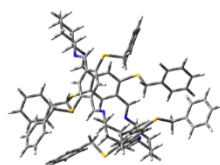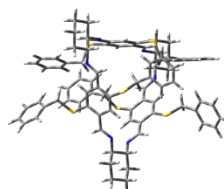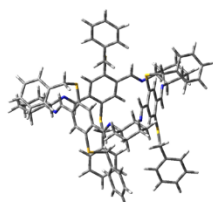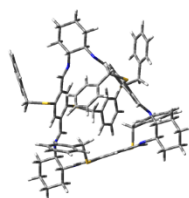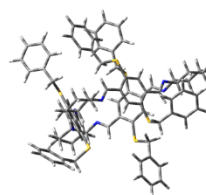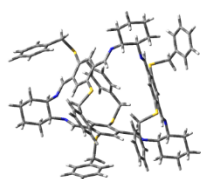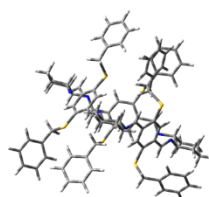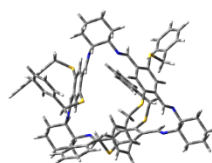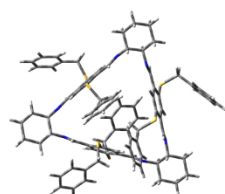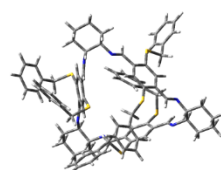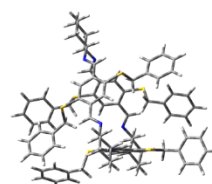

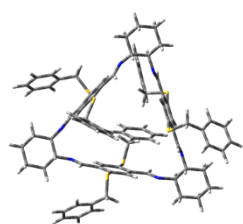

conf. 91

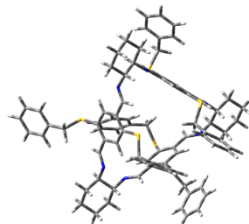

conf. 92

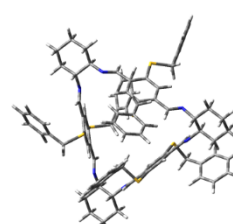

conf. 97

**Figure S14.** Structures of the low-energy conformers of **6a**, calculated at the B3LYP/6-311G(d,p) level.

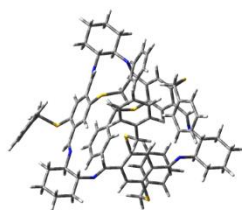

conf. 32

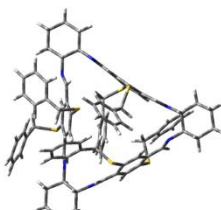

conf. 53

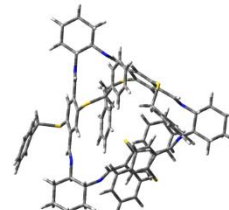

conf. 60

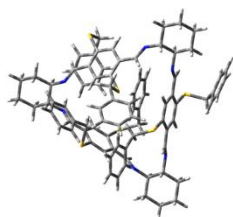

conf. 93

**Figure S15.** Structures of the low-energy conformers of **6a**, calculated at the B3LYP-GD3BJ/6-311G(d,p) level.



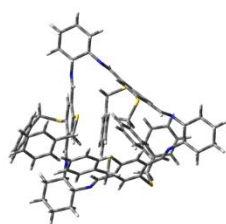

conf. 5

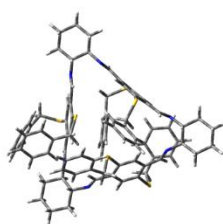

conf. 7

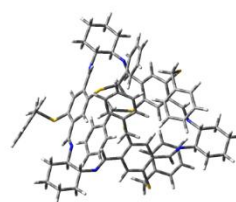

conf. 32

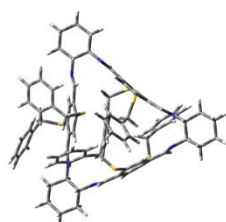

conf. 53

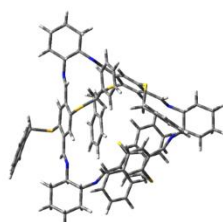

conf. 60

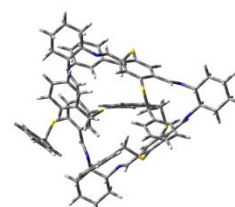

conf. 81

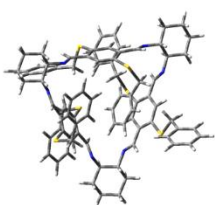

conf. 82

**Figure S16.** Structures of the low-energy conformers of **6a**, calculated at the M06L/6-311G(d,p) level.

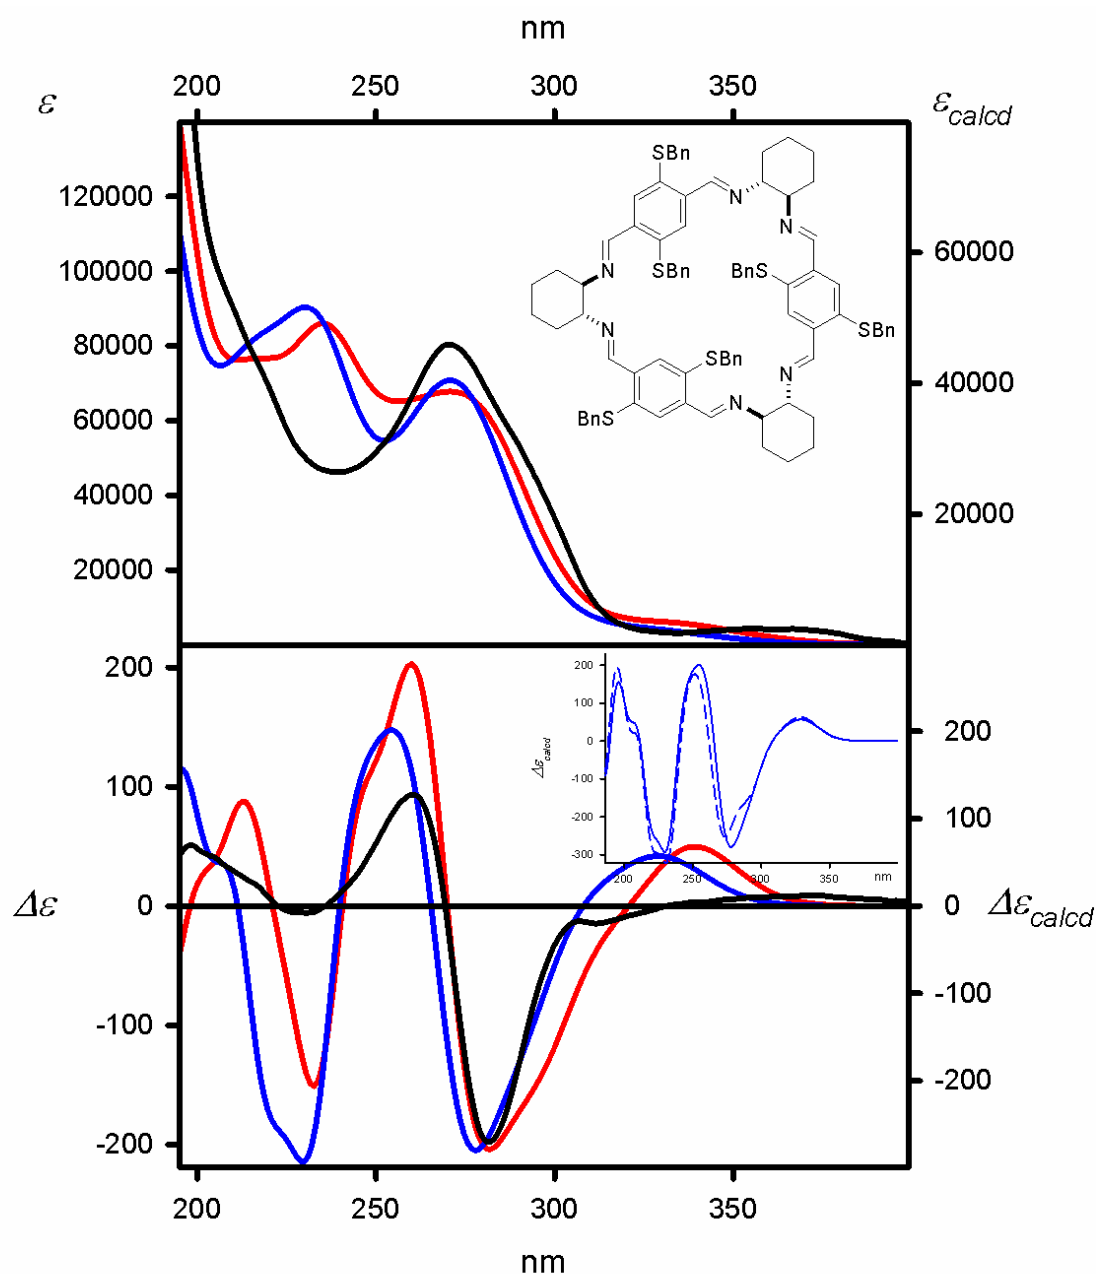

Experimental (cyclohexane, black lines)

Calculated at the  
 TD-CAM-B3LYP/6-311G(d,p) level and:  
 $\Delta E$ -based Boltzmann averaged (red lines)  
 $\Delta\Delta G$ -based Boltzmann averaged (blue lines)  
 Geometry optimized at the  
 B3LYP/6-311G(d,p) level

**Figure S17.** UV (upper panel) and ECD (lower panel) spectra of **6a** measured in cyclohexane (solid black lines) and calculated at the TD-CAM-B3LYP/6-311G(d,p) level for geometries optimized at the B3LYP/6-311G(d,p) level. The calculated ECD spectra were Boltzmann-averaged based on  $\Delta E$  (red lines) and  $\Delta\Delta G$  values (blue lines). Wavelengths were corrected to match the experimental UV maxima. The insert shows the comparison between the ECD spectra calculated for the lowest energy conformer of a given compound (dashed blue lines) and the  $\Delta\Delta G$ -based and Boltzmann averaged (solid blue lines).

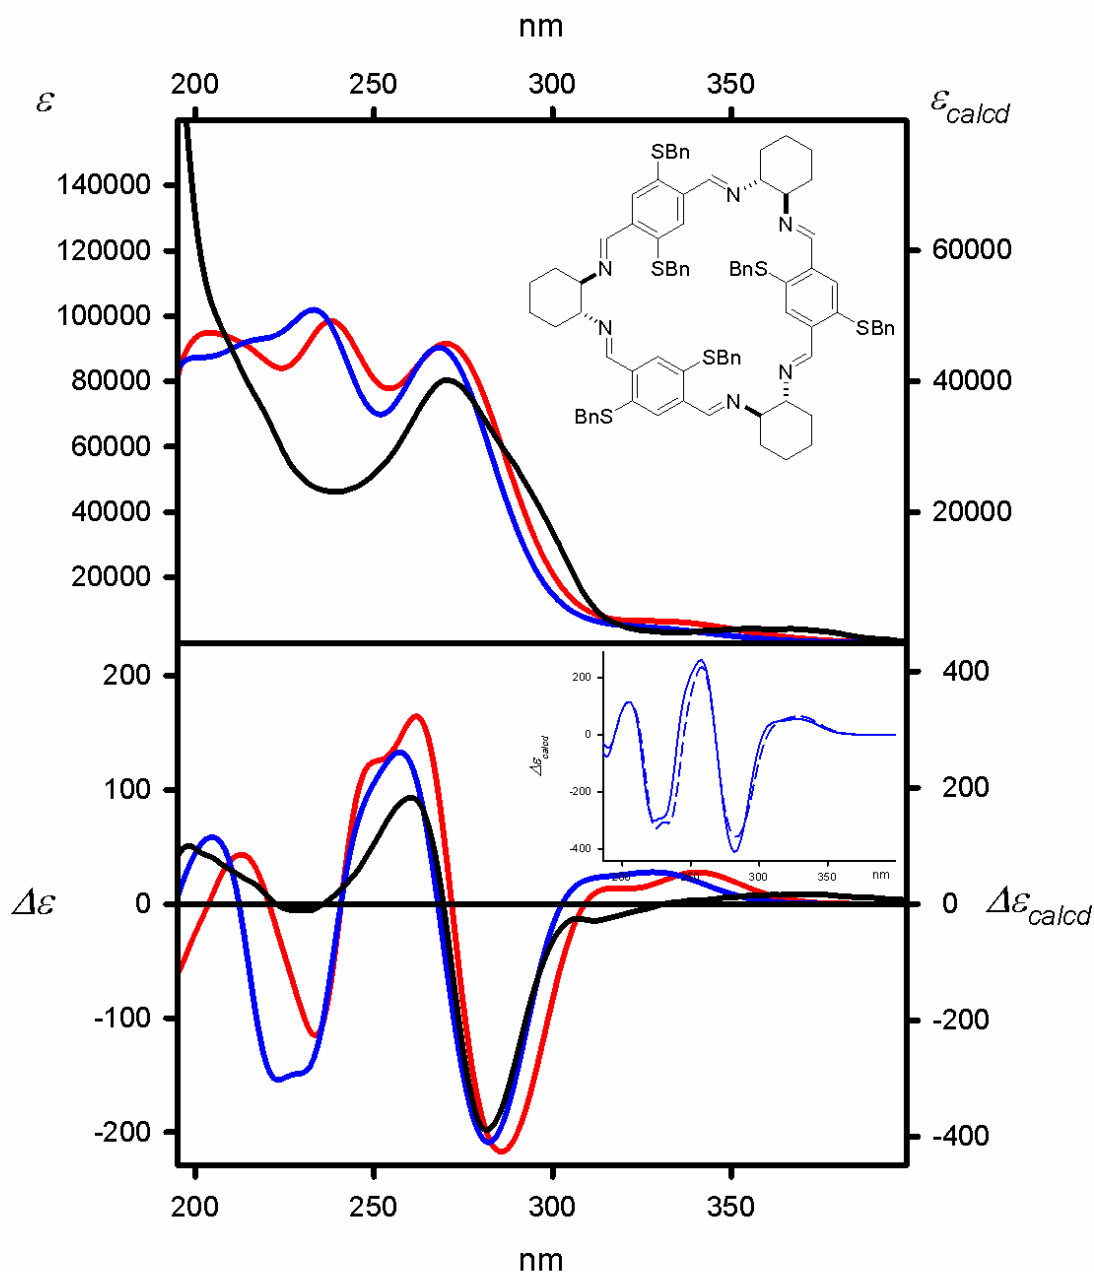

Experimental (cyclohexane, black lines)

Calculated at the  
TD-M06-2X/6-311G(d,p) level and:

$\Delta E$ -based Boltzmann averaged (red lines)

$\Delta\Delta G$ -based Boltzmann averaged (blue lines)

Geometry optimized at the  
B3LYP/6-311G(d,p) level

**Figure S18.** UV (upper panel) and ECD (lower panel) spectra of **6a** measured in cyclohexane (solid black lines) and calculated at the TD-M06-2X/6-311G(d,p) level for geometries optimized at the B3LYP/6-311G(d,p) level. The calculated ECD spectra were Boltzmann-averaged based on  $\Delta E$  (red lines) and  $\Delta\Delta G$  values (blue lines). Wavelengths were corrected to match the experimental UV maxima. The insert shows the comparison between the ECD spectra calculated for the lowest energy conformer of a given compound (dashed blue lines) and the  $\Delta\Delta G$ -based and Boltzmann averaged (solid blue lines).

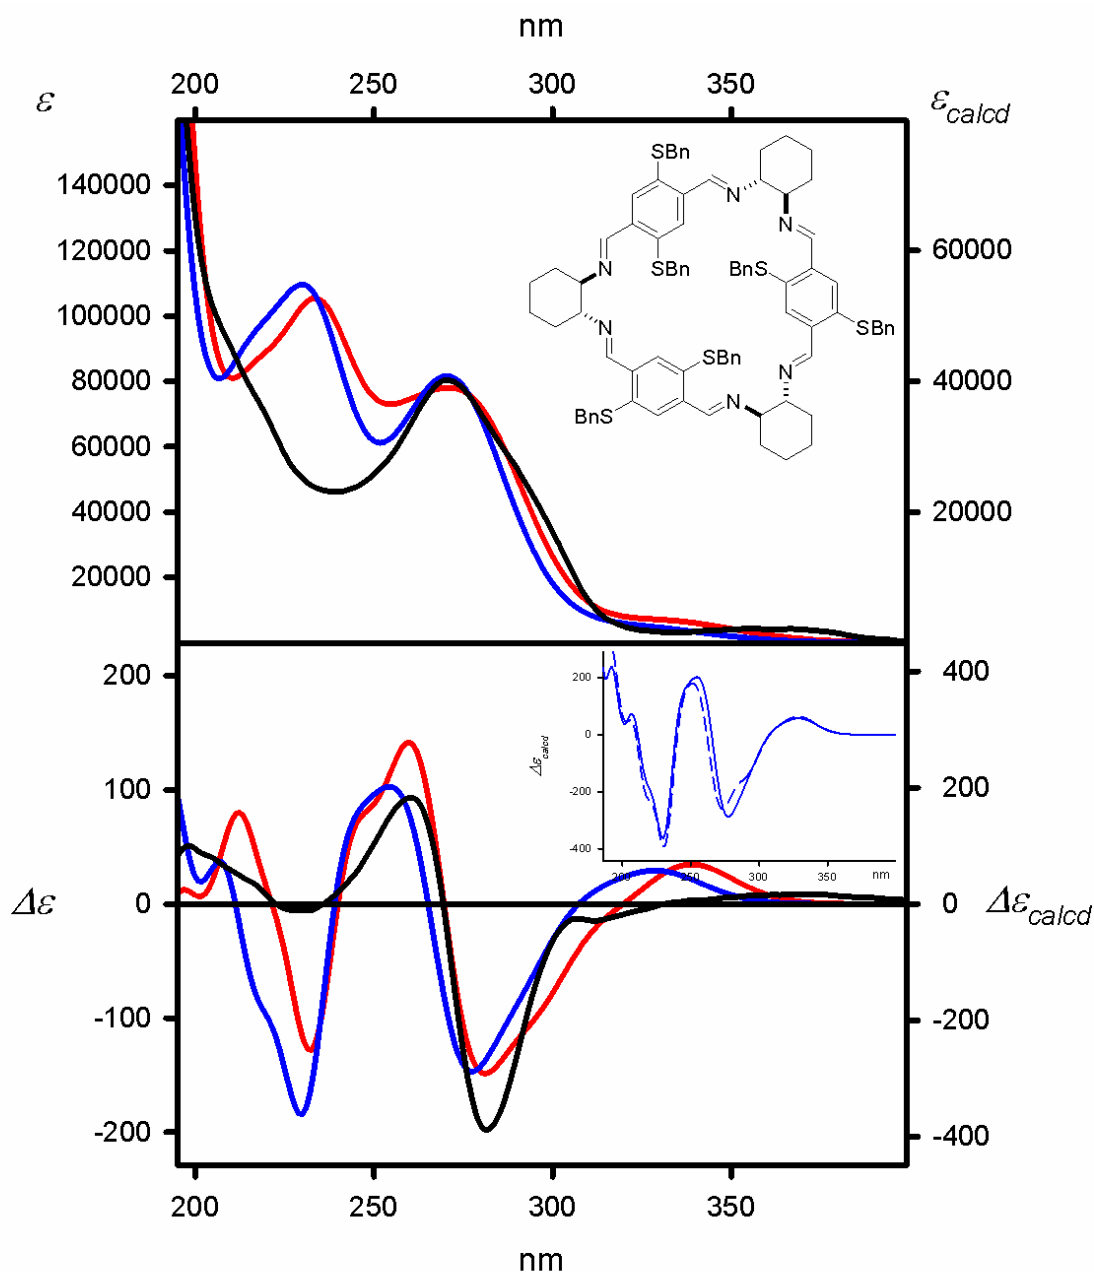

Experimental (cyclohexane, black lines)

Calculated at the  
TD-wB97XD/6-311G(d,p) level and:

$\Delta E$ -based Boltzmann averaged (red lines)

$\Delta\Delta G$ -based Boltzmann averaged (blue lines)

Geometry optimized at the  
B3LYP/6-311G(d,p) level

**Figure S19.** UV (upper panel) and ECD (lower panel) spectra of **6a** measured in cyclohexane (solid black lines) and calculated at the TD-wB97XD/6-311G(d,p) level for geometries optimized at the B3LYP/6-311G(d,p) level. The calculated ECD spectra were Boltzmann-averaged based on  $\Delta E$  (red lines) and  $\Delta\Delta G$  values (blue lines). Wavelengths were corrected to match the experimental UV maxima. The insert shows the comparison between the ECD spectra calculated for the lowest energy conformer of a given compound (dashed blue lines) and the  $\Delta\Delta G$ -based and Boltzmann averaged (solid blue lines).

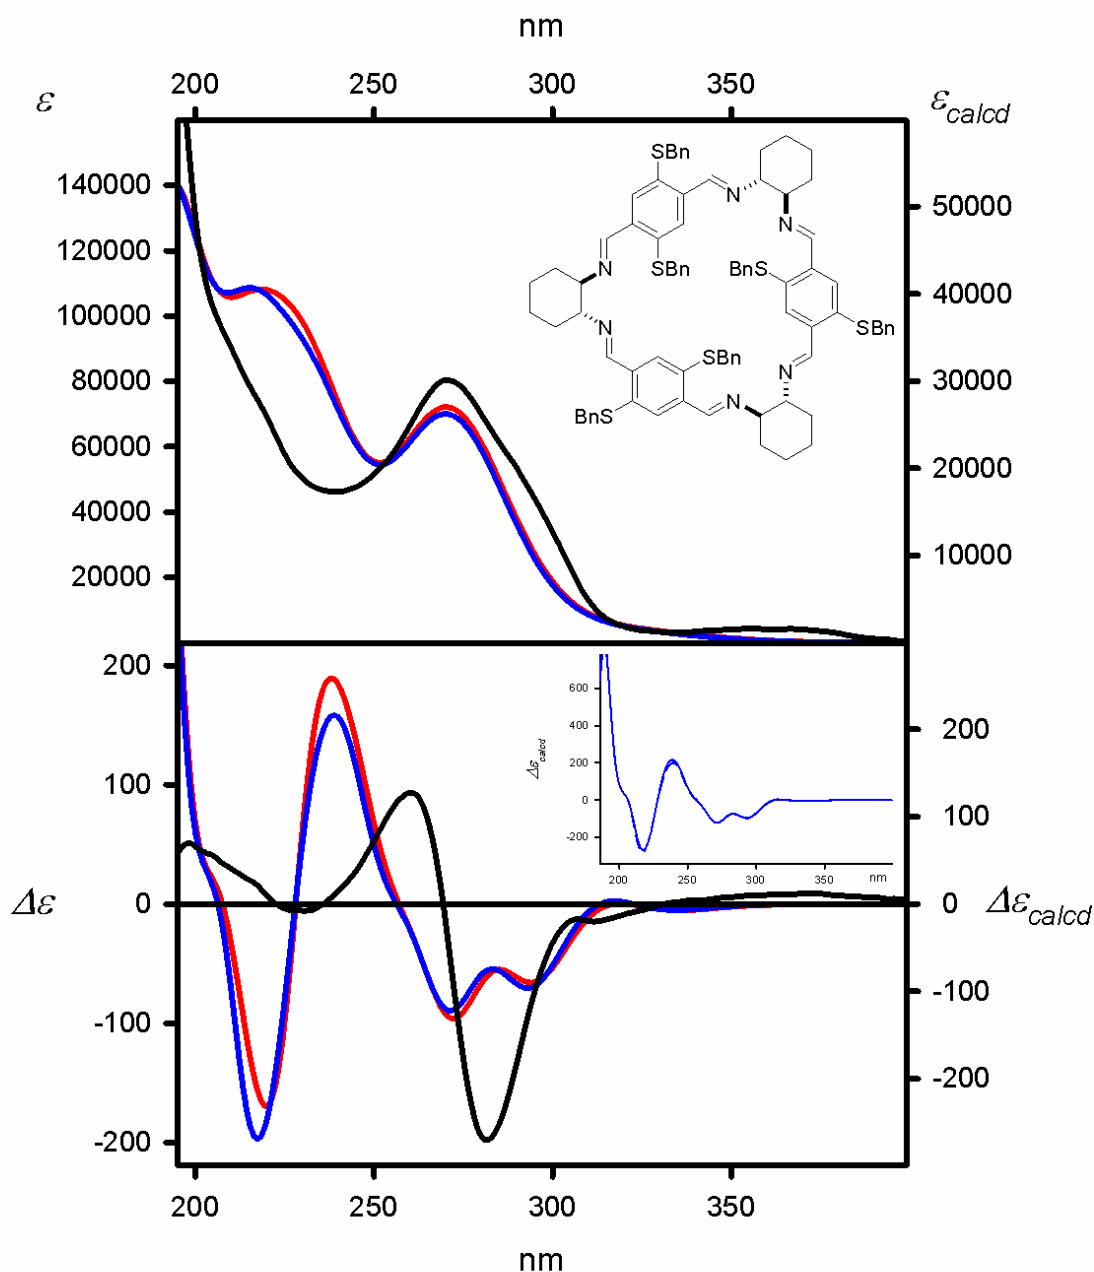

Experimental (cyclohexane, black lines)

Calculated at the  
 TD-CAM-B3LYP/6-311G(d,p) level and:  
 $\Delta E$ -based Boltzmann averaged (red lines)  
 $\Delta\Delta G$ -based Boltzmann averaged (blue lines)  
 Geometry optimized at the  
 B3LYP-GD3BJ/6-311G(d,p) level

**Figure S20.** UV (upper panel) and ECD (lower panel) spectra of **6a** measured in cyclohexane (solid black lines) and calculated at the TD-CAM-B3LYP/6-311G(d,p) level for geometries optimized at the B3LYP-GD3BJ/6-311G(d,p) level. The calculated ECD spectra were Boltzmann-averaged based on  $\Delta E$  (red lines) and  $\Delta\Delta G$  values (blue lines). Wavelengths were corrected to match the experimental UV maxima. The insert shows the comparison between the ECD spectra calculated for the lowest energy conformer of a given compound (dashed blue lines) and the  $\Delta\Delta G$ -based and Boltzmann averaged (solid blue lines).

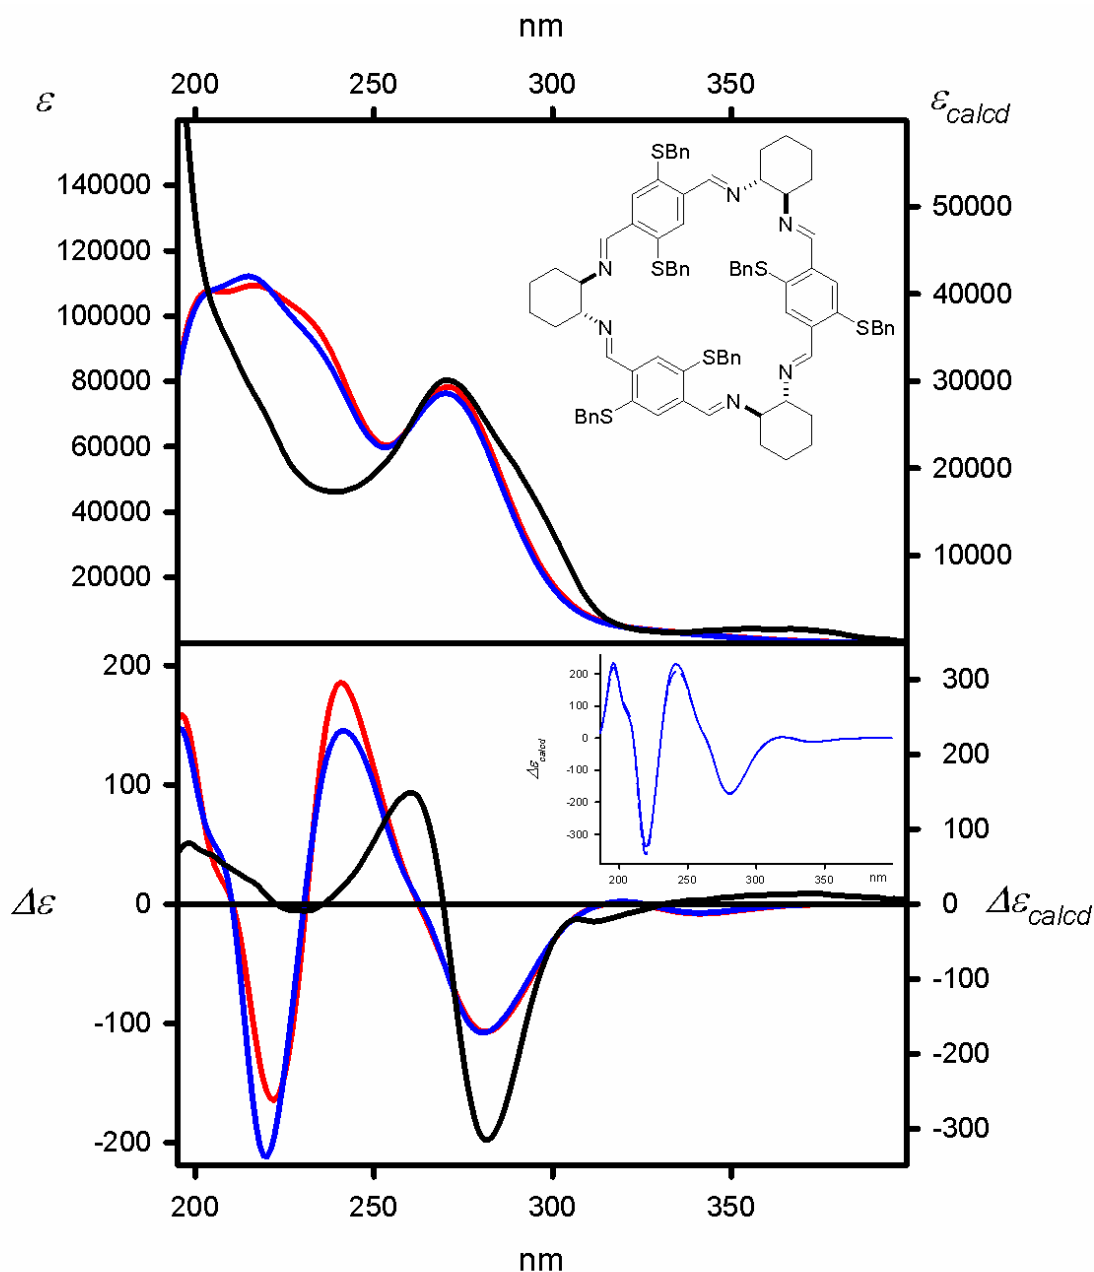

Experimental (cyclohexane, black lines)

Calculated at the  
TD-M06-2X/6-311G(d,p) level and:

$\Delta E$ -based Boltzmann averaged (red lines)

$\Delta\Delta G$ -based Boltzmann averaged (blue lines)

Geometry optimized at the  
B3LYP-GD3BJ/6-311G(d,p) level

**Figure S21.** UV (upper panel) and ECD (lower panel) spectra of **6a** measured in cyclohexane (solid black lines) and calculated at the TD-M06-2X/6-311G(d,p) level for geometries optimized at the B3LYP-GD3BJ/6-311G(d,p) level. The calculated ECD spectra were Boltzmann-averaged based on  $\Delta E$  (red lines) and  $\Delta\Delta G$  values (blue lines). Wavelengths were corrected to match the experimental UV maxima. The insert shows the comparison between the ECD spectra calculated for the lowest energy conformer of a given compound (dashed blue lines) and the  $\Delta\Delta G$ -based and Boltzmann averaged (solid blue lines).

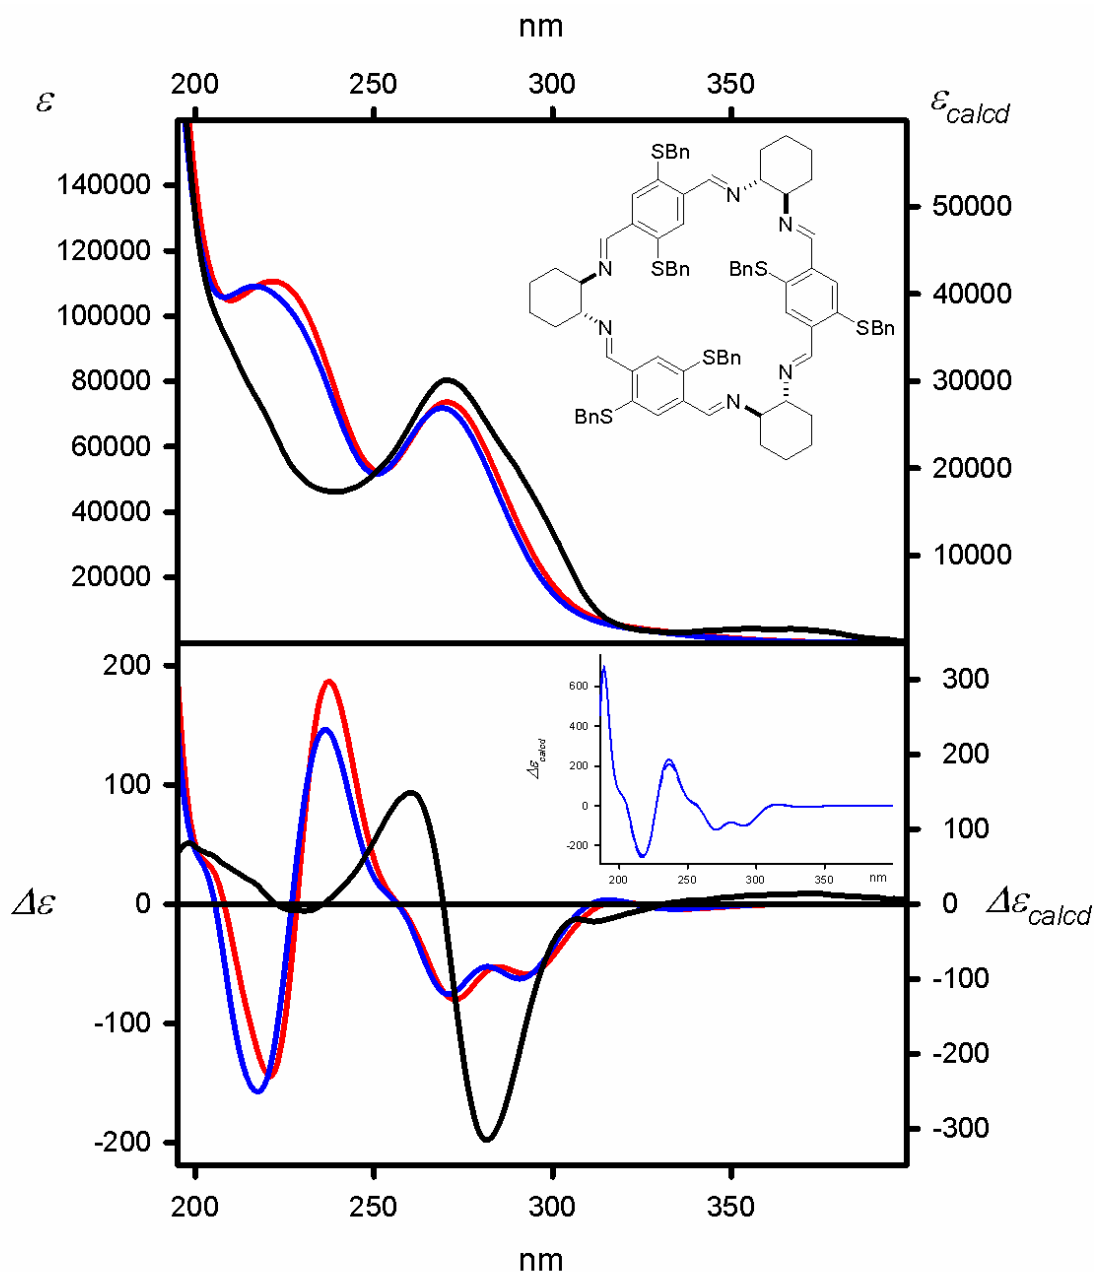

Experimental (cyclohexane, black lines)

Calculated at the  
TD-wB97XD/6-311G(d,p) level and:

$\Delta E$ -based Boltzmann averaged (red lines)

$\Delta\Delta G$ -based Boltzmann averaged (blue lines)

Geometry optimized at the  
B3LYP-GD3BJ/6-311G(d,p) level

**Figure S22.** UV (upper panel) and ECD (lower panel) spectra of **6a** measured in cyclohexane (solid black lines) and calculated at the TD-wB97XD/6-311G(d,p) level for geometries optimized at the B3LYP-GD3BJ/6-311G(d,p) level. The calculated ECD spectra were Boltzmann-averaged based on  $\Delta E$  (red lines) and  $\Delta\Delta G$  values (blue lines). Wavelengths were corrected to match the experimental UV maxima. The insert shows the comparison between the ECD spectra calculated for the lowest energy conformer of a given compound (dashed blue lines) and the  $\Delta\Delta G$ -based and Boltzmann averaged (solid blue lines).

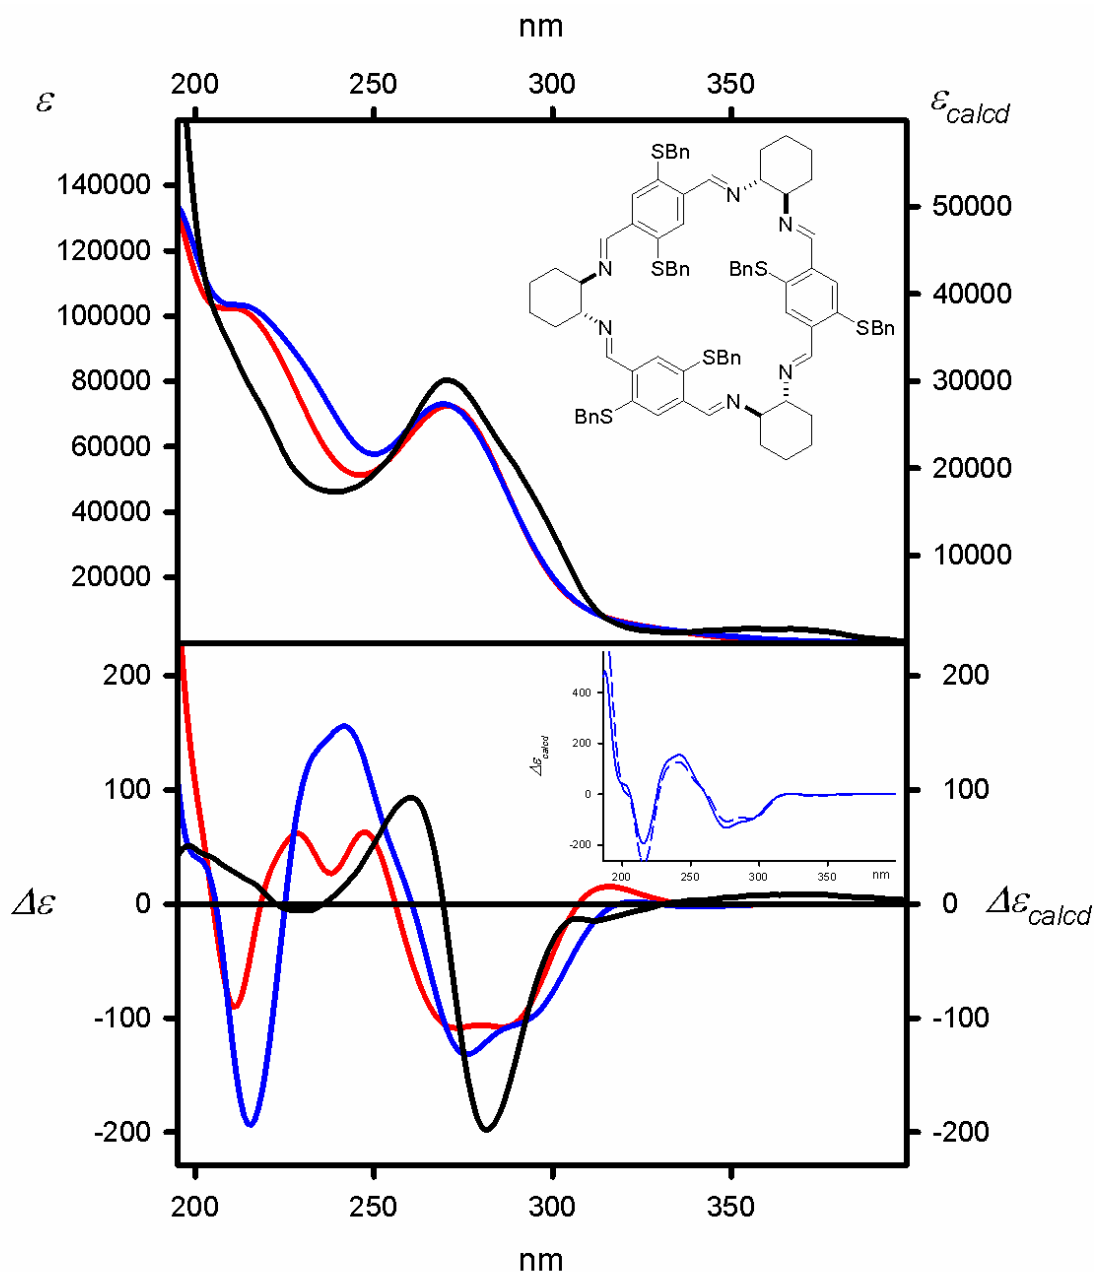

**Figure S23.** UV (upper panel) and ECD (lower panel) spectra of **6a** measured in cyclohexane (solid black lines) and calculated at the TD-CAM-B3LYP/6-311G(d,p) level for geometries optimized at the M06L/6-311G(d,p) level. The calculated ECD spectra were Boltzmann-averaged based on  $\Delta E$  (red lines) and  $\Delta\Delta G$  values (blue lines). Wavelengths were corrected to match the experimental UV maxima. The insert shows the comparison between the ECD spectra calculated for the lowest energy conformer of a given compound (dashed blue lines) and the  $\Delta\Delta G$ -based and Boltzmann averaged (solid blue lines).



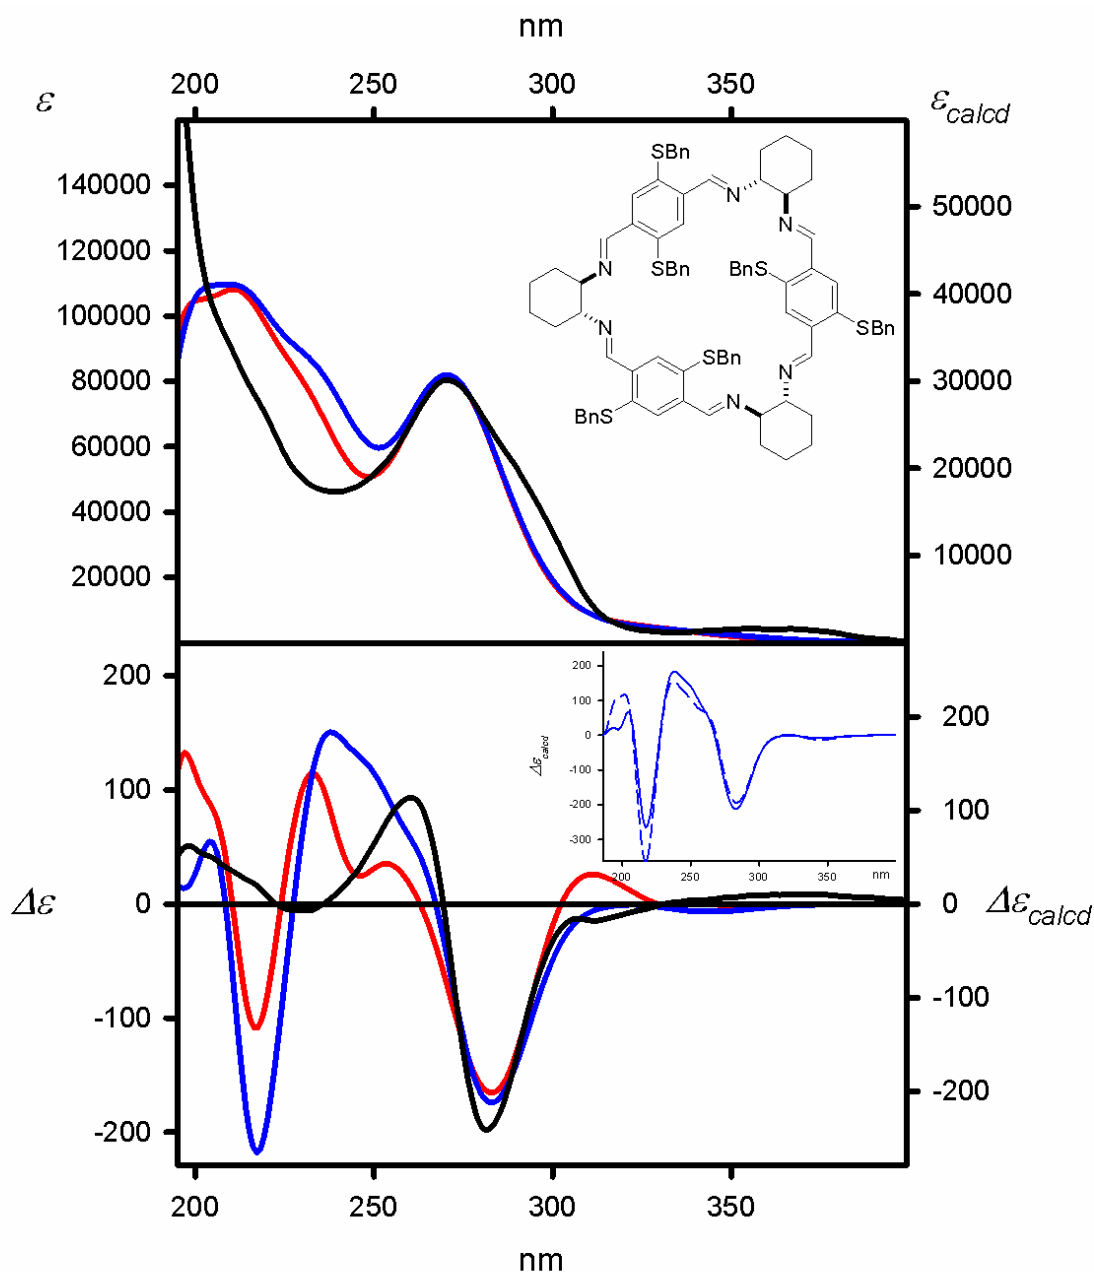

Experimental (cyclohexane, black lines)

Calculated at the  
 TD-M06-2X/6-311G(d,p) level and:  
 $\Delta E$ -based Boltzmann averaged (red lines)  
 $\Delta\Delta G$ -based Boltzmann averaged (blue lines)  
 Geometry optimized at the  
 M06L/6-311G(d,p) level

**Figure S24.** UV (upper panel) and ECD (lower panel) spectra of **6a** measured in cyclohexane (solid black lines) and calculated at the TD-M06-2X/6-311G(d,p) level for geometries optimized at the M06L/6-311G(d,p) level. The calculated ECD spectra were Boltzmann-averaged based on  $\Delta E$  (red lines) and  $\Delta\Delta G$  values (blue lines). Wavelengths were corrected to match the experimental UV maxima. The insert shows the comparison between the ECD spectra calculated for the lowest energy conformer of a given compound (dashed blue lines) and the  $\Delta\Delta G$ -based and Boltzmann averaged (solid blue lines).

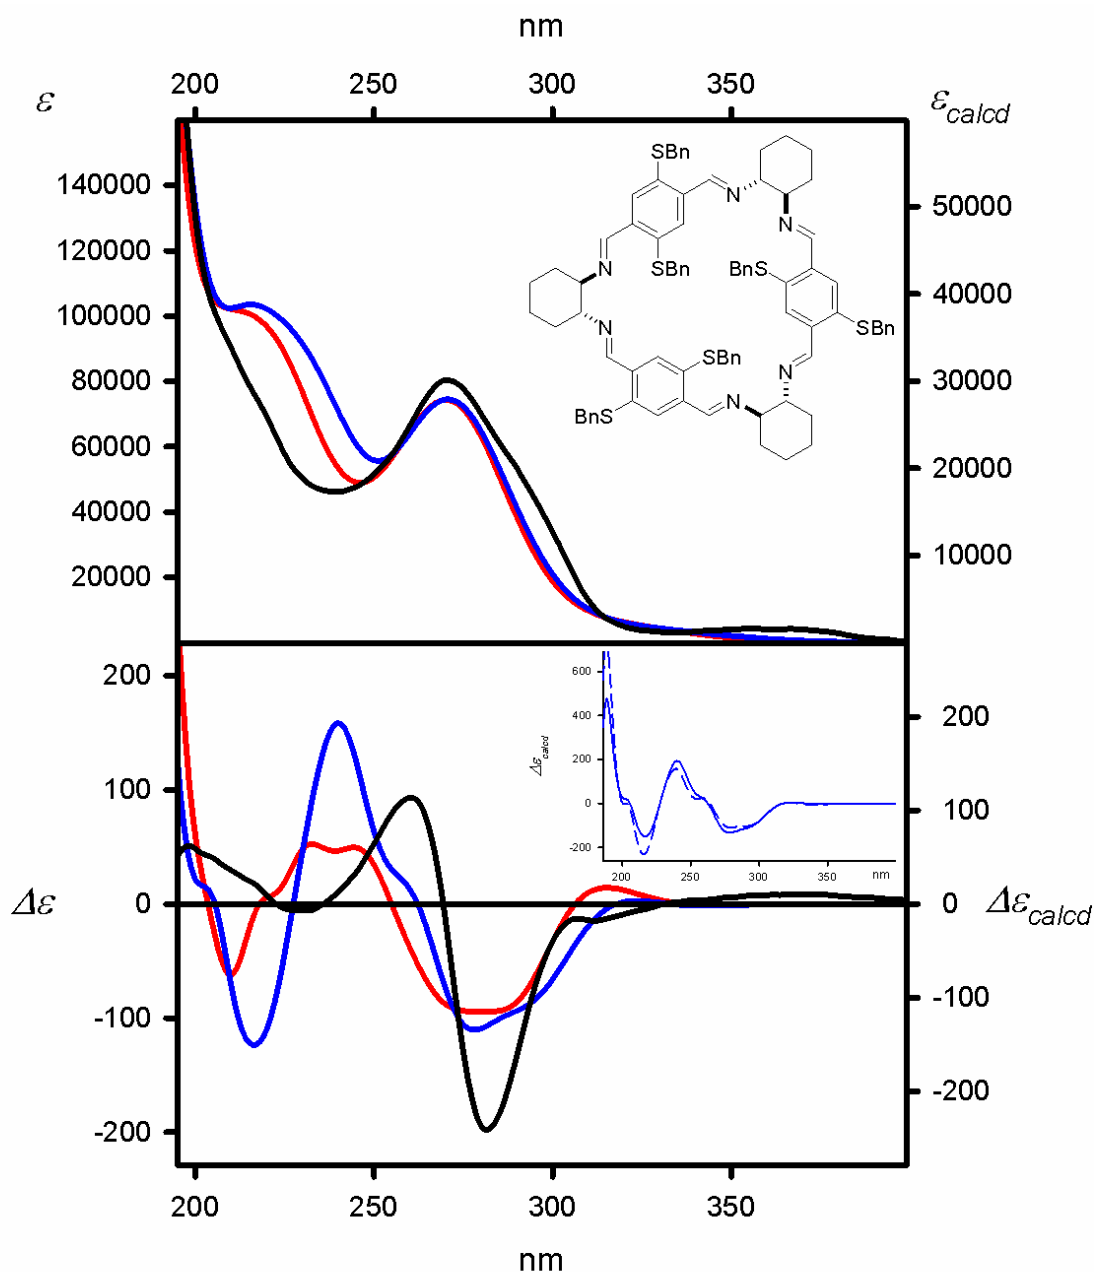

Experimental (cyclohexane, black lines)

Calculated at the  
TD-wB97XD/6-311G(d,p) level and:

$\Delta E$ -based Boltzmann averaged (red lines)

$\Delta\Delta G$ -based Boltzmann averaged (blue lines)

Geometry optimized at the  
M06L/6-311G(d,p) level

**Figure S25.** UV (upper panel) and ECD (lower panel) spectra of **6a** measured in cyclohexane (solid black lines) and calculated at the TD-wB97XD/6-311G(d,p) level for geometries optimized at the M06L/6-311G(d,p) level. The calculated ECD spectra were Boltzmann-averaged based on  $\Delta E$  (red lines) and  $\Delta\Delta G$  values (blue lines). Wavelengths were corrected to match the experimental UV maxima. The insert shows the comparison between the ECD spectra calculated for the lowest energy conformer of a given compound (dashed blue lines) and the  $\Delta\Delta G$ -based and Boltzmann averaged (solid blue lines).

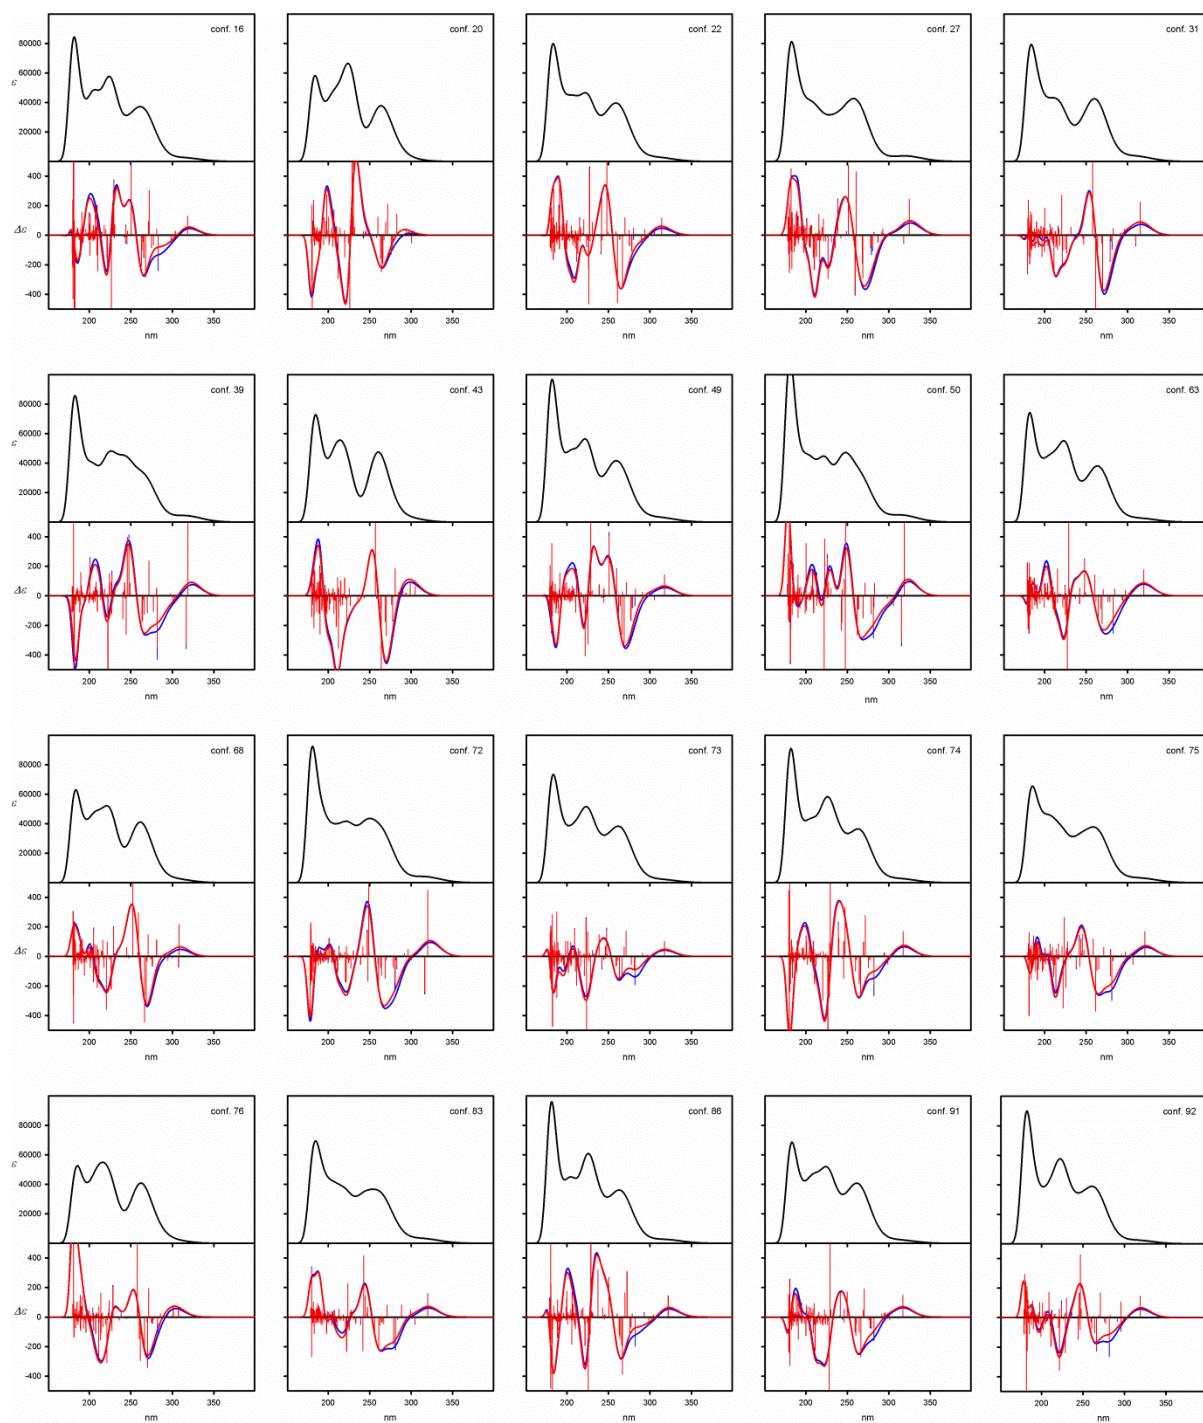

**Figure S26.** UV (upper panels) and ECD (lower panels) spectra calculated at the TD-CAM-B3LYP/6-311G(d,p) level for individual low-energy conformers of **6a**. Wavelengths were not corrected. Geometries were optimized at the B3LYP/6-311G(d,p) level.



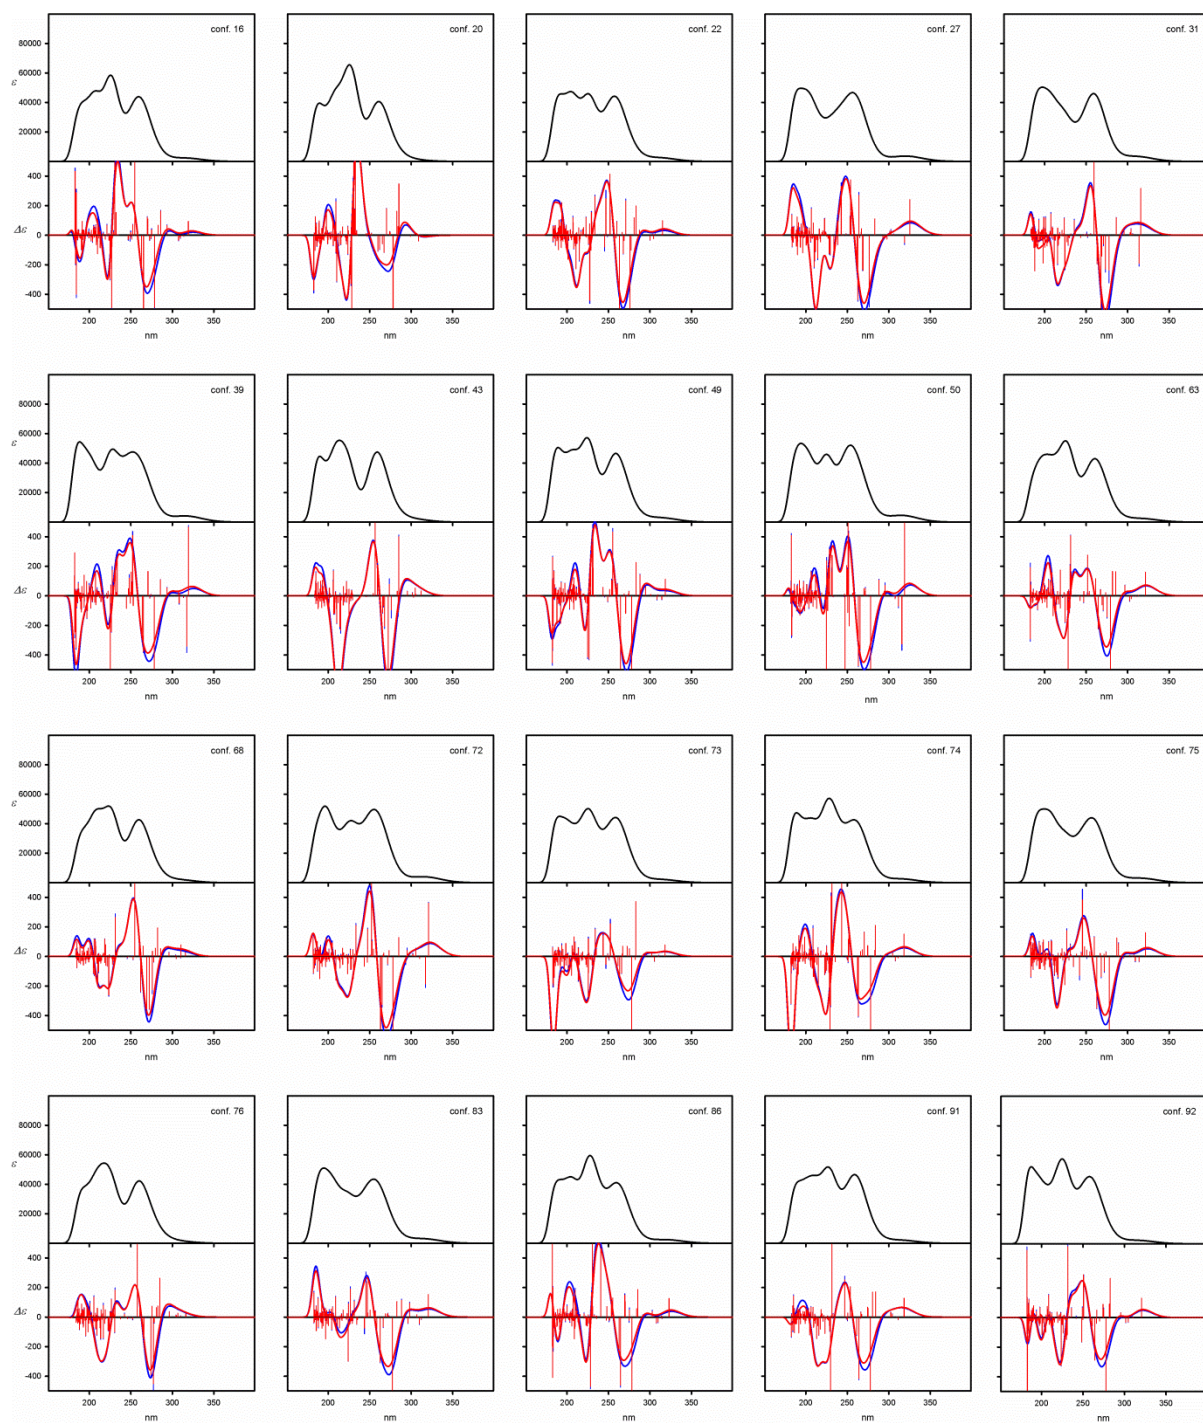

**Figure S27.** UV (upper panels) and ECD (lower panels) spectra calculated at the TD-M06-2X/6-311G(d,p) level for individual low-energy conformers of **6a**. Wavelengths were not corrected. Geometries were optimized at the B3LYP/6-311G(d,p) level.



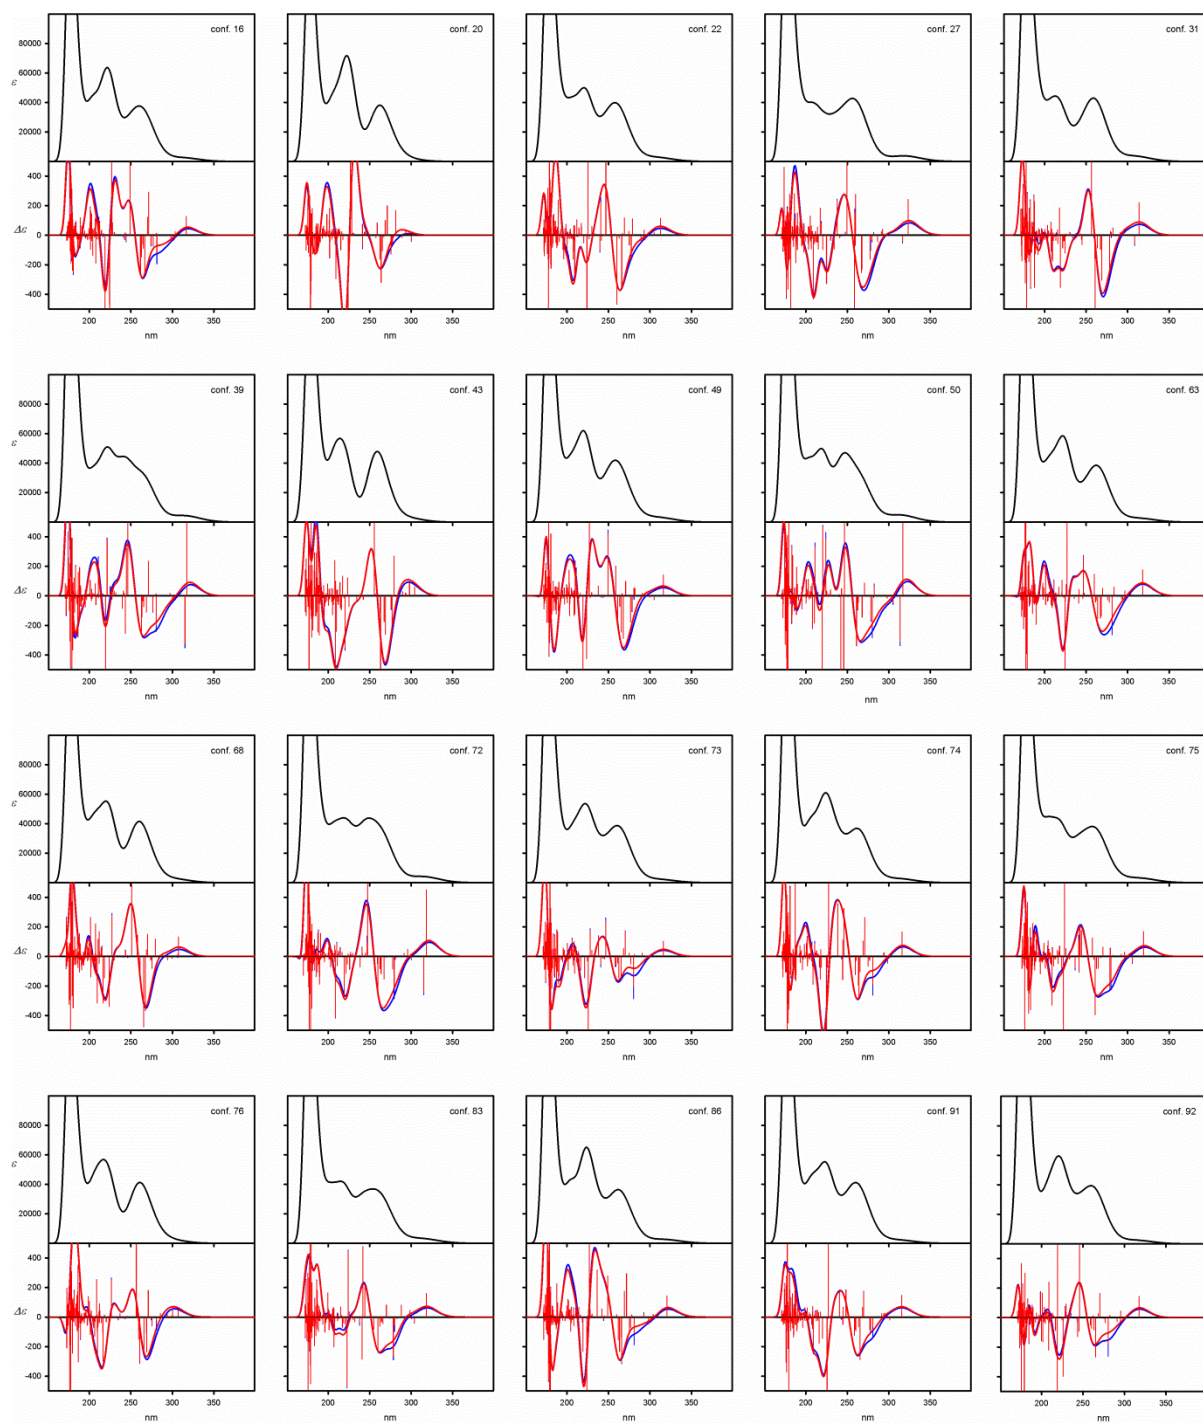

**Figure S28.** UV (upper panels) and ECD (lower panels) spectra calculated at the TD-wB97XD/6-311G(d,p) level for individual low-energy conformers of **6a**. Wavelengths were not corrected. Geometries were optimized at the B3LYP/6-311G(d,p) level.

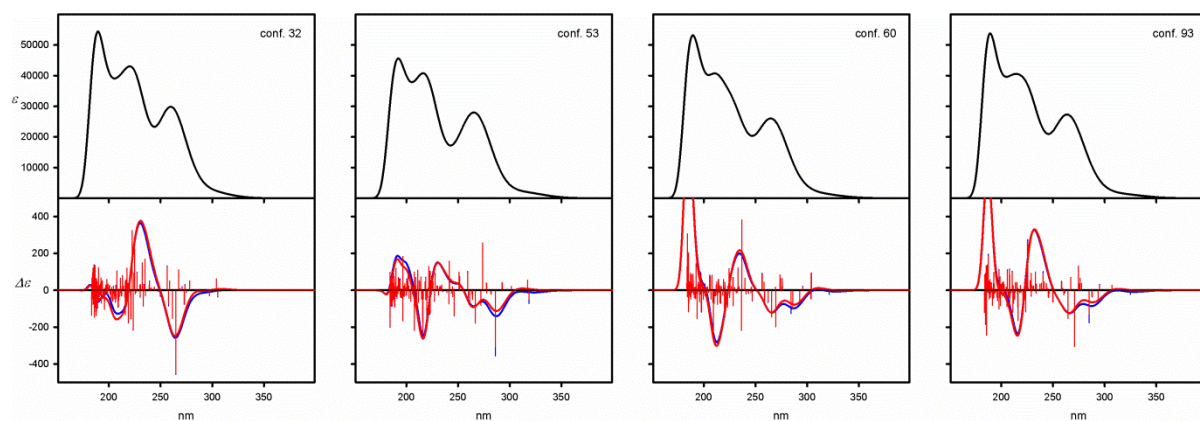

**Figure S29.** UV (upper panels) and ECD (lower panels) spectra calculated at the TD-CAM-B3LYP/6-311G(d,p) level for individual low-energy conformers of **6a**. Wavelengths were not corrected. Geometries were optimized at the B3LYP-GD3BJ/6-311G(d,p) level.

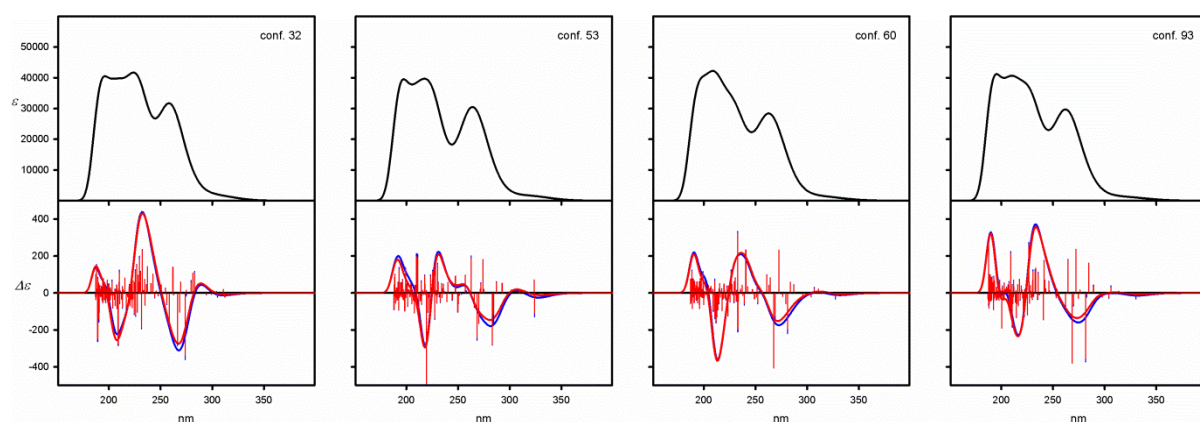

**Figure S30.** UV (upper panels) and ECD (lower panels) spectra calculated at the TD-M06-2X/6-311G(d,p) level for individual low-energy conformers of **6a**. Wavelengths were not corrected. Geometries were optimized at the B3LYP-GD3BJ/6-311G(d,p) level.

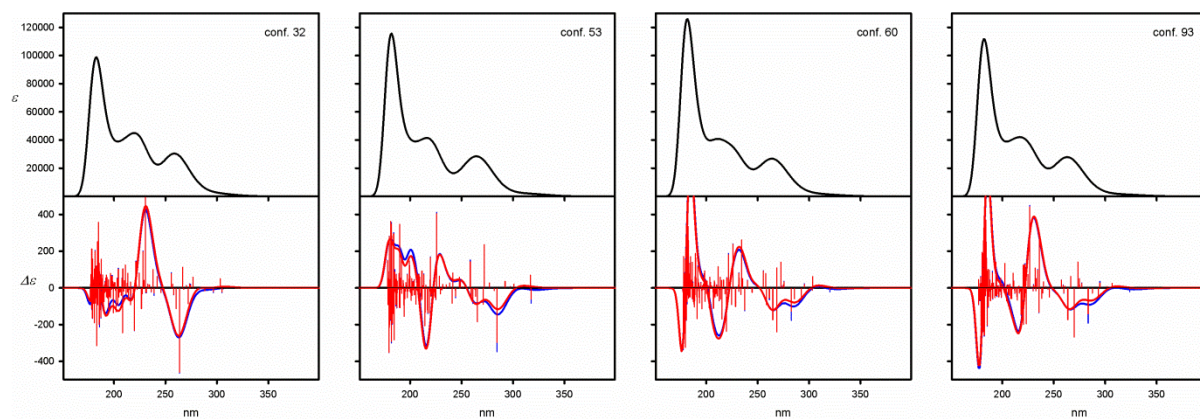

**Figure S31.** UV (upper panels) and ECD (lower panels) spectra calculated at the TD-wB97XD/6-311G(d,p) level for individual low-energy conformers of **6a**. Wavelengths were not corrected. Geometries were optimized at the B3LYP-GD3BJ/6-311G(d,p) level.



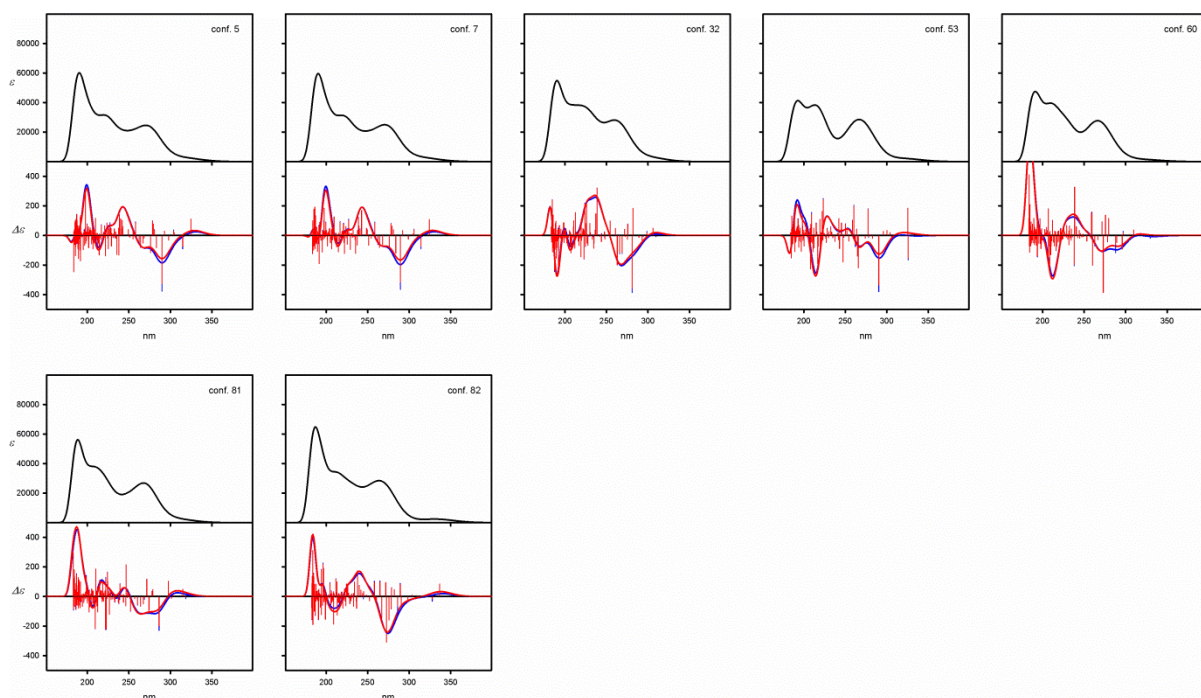

**Figure S32.** UV (upper panels) and ECD (lower panels) spectra calculated at the TD-CAM-B3LYP/6-311G(d,p) level for individual low-energy conformers of **6a**. Wavelengths were not corrected. Geometries were optimized at the M06L/6-311G(d,p) level.

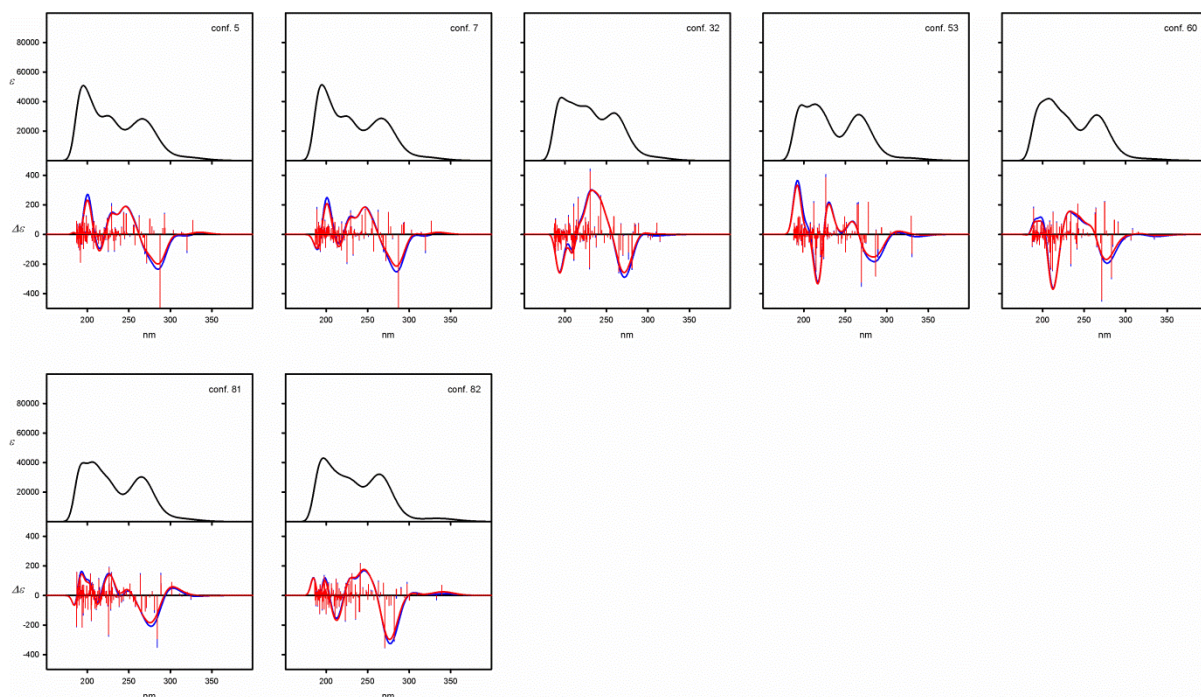

**Figure S33.** UV (upper panels) and ECD (lower panels) spectra calculated at the TD-M06-2X/6-311G(d,p) level for individual low-energy conformers of **6a**. Wavelengths were not corrected. Geometries were optimized at the M06L/6-311G(d,p) level.

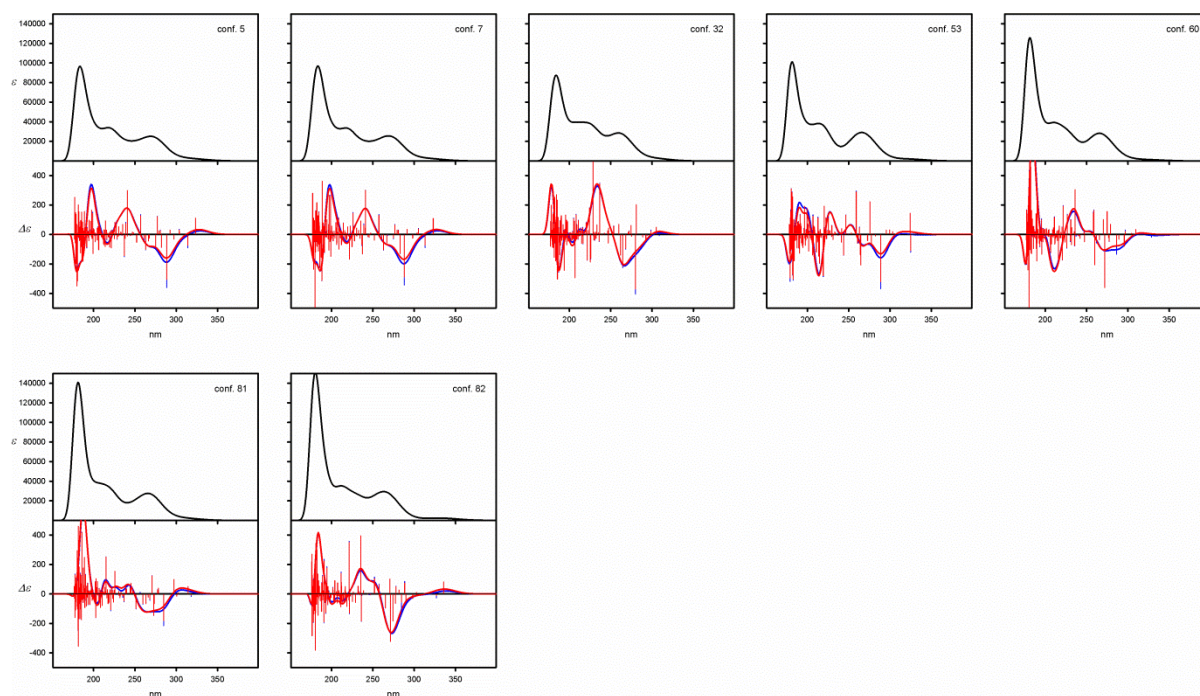

**Figure S34.** UV (upper panels) and ECD (lower panels) spectra calculated at the TD-wB97XD/6-311G(d,p) level for individual low-energy conformers of **6a**. Wavelengths were not corrected. Geometries were optimized at the M06L/6-311G(d,p) level.



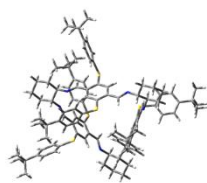

conf. 15

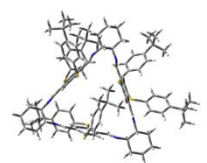

conf. 25

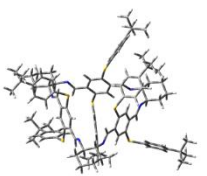

conf. 29

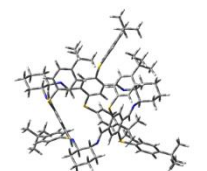

conf. 38

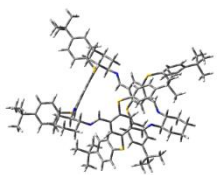

conf. 46

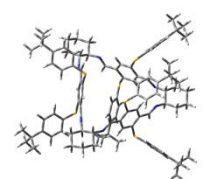

conf. 49

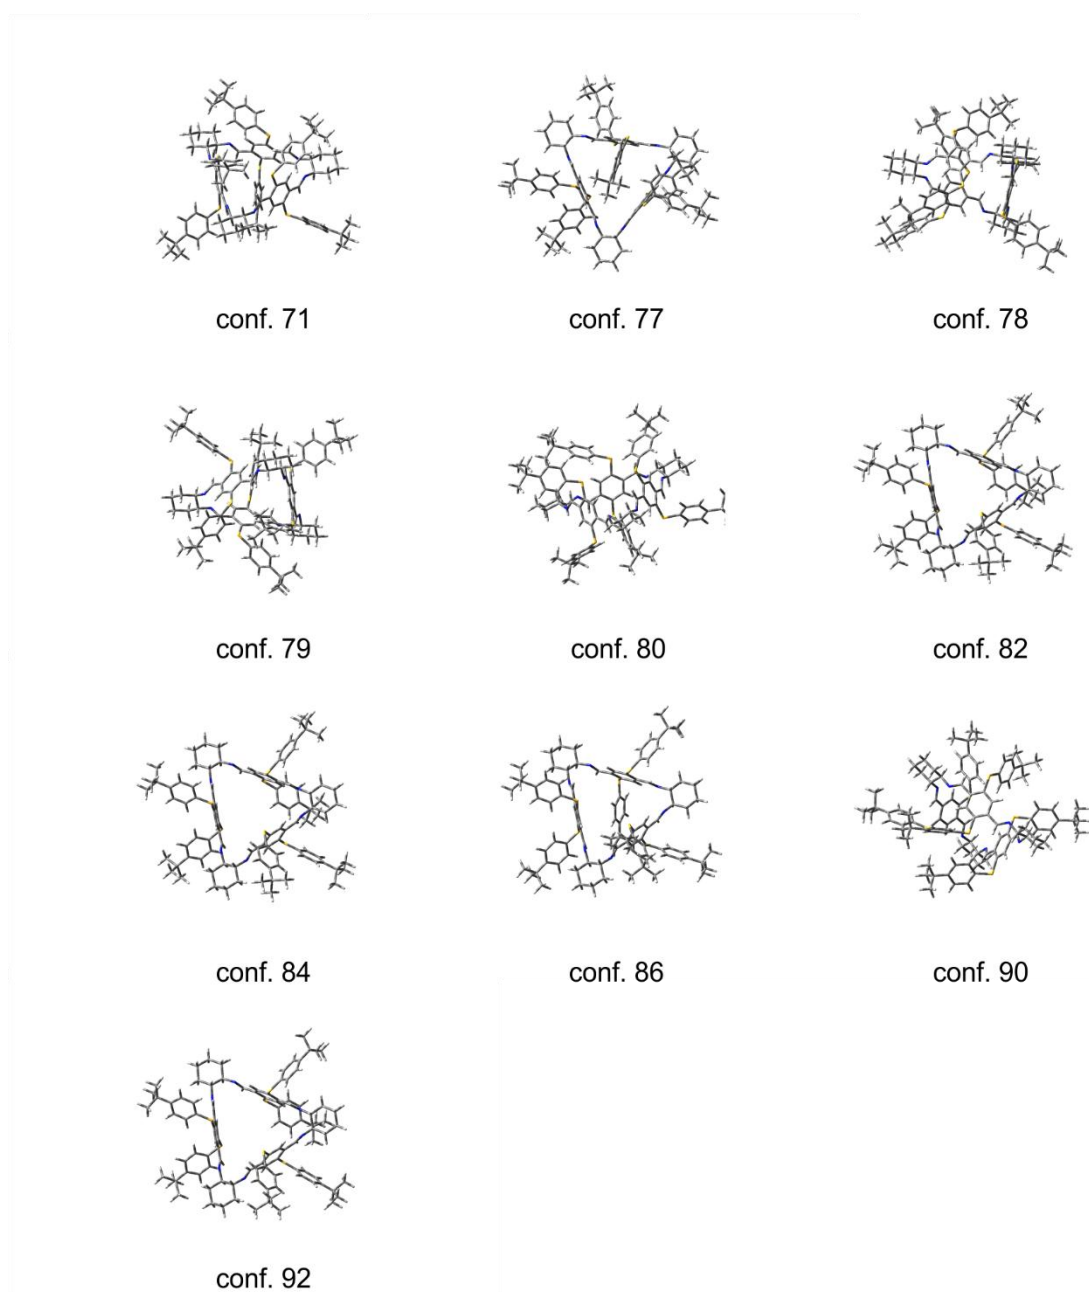

**Figure S35.** Structures of the low-energy conformers of **6c**, calculated at the B3LYP/6-31G(d,p) level.

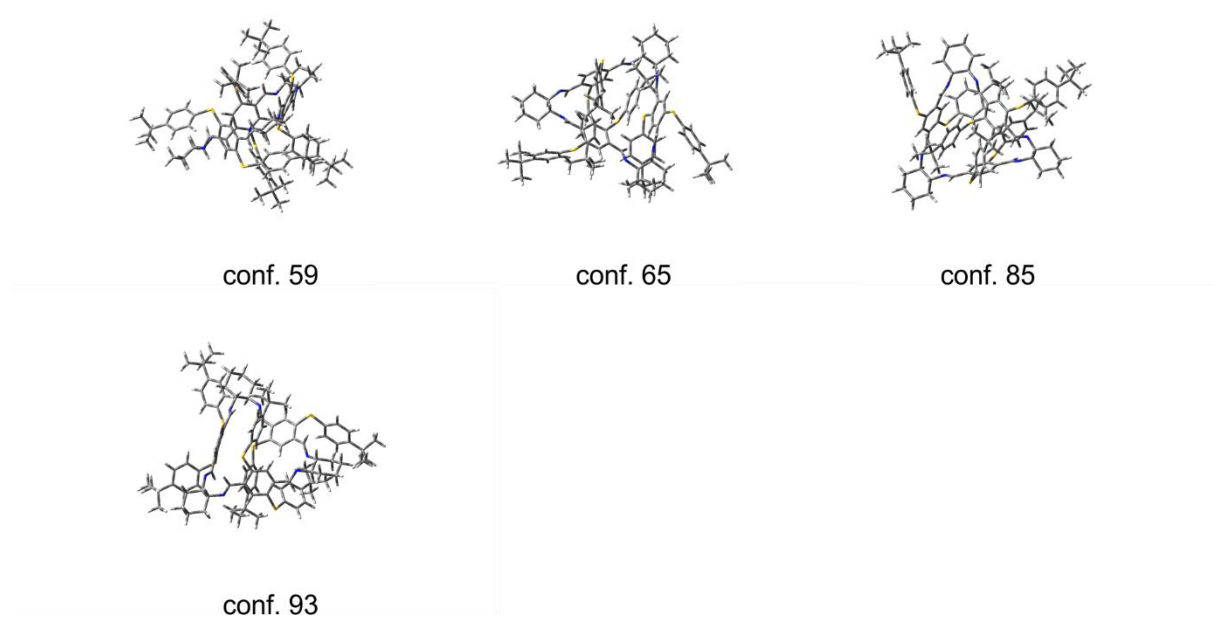

**Figure S36.** Structures of the low-energy conformers of **6c**, calculated at the B3LYP-GD3BJ/6-31G(d,p) level.

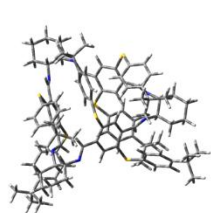

conf. 3

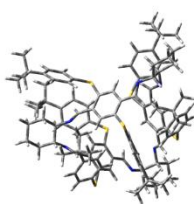

conf. 4

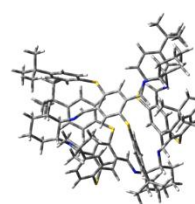

conf. 6

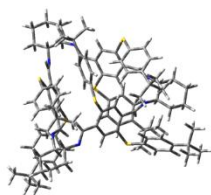

conf. 7

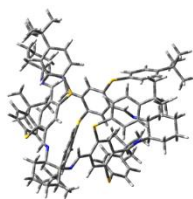

conf. 8

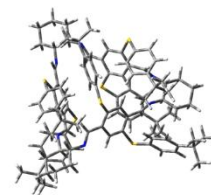

conf. 13

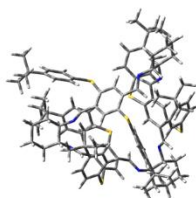

conf. 21

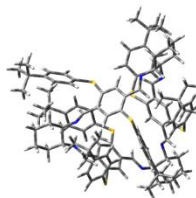

conf. 37

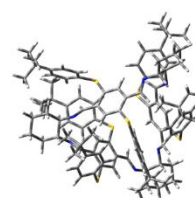

conf. 45

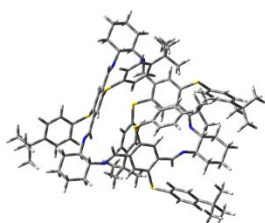

conf. 64

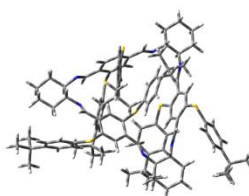

conf. 65

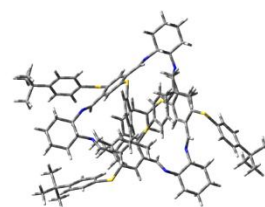

conf. 70

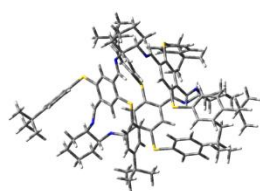

conf. 80

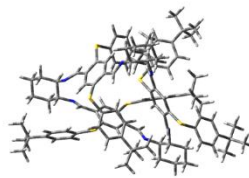

conf. 99

**Figure S37.** Structures of the low-energy conformers of **6c**, calculated at the M06L/6-31G(d,p) level.

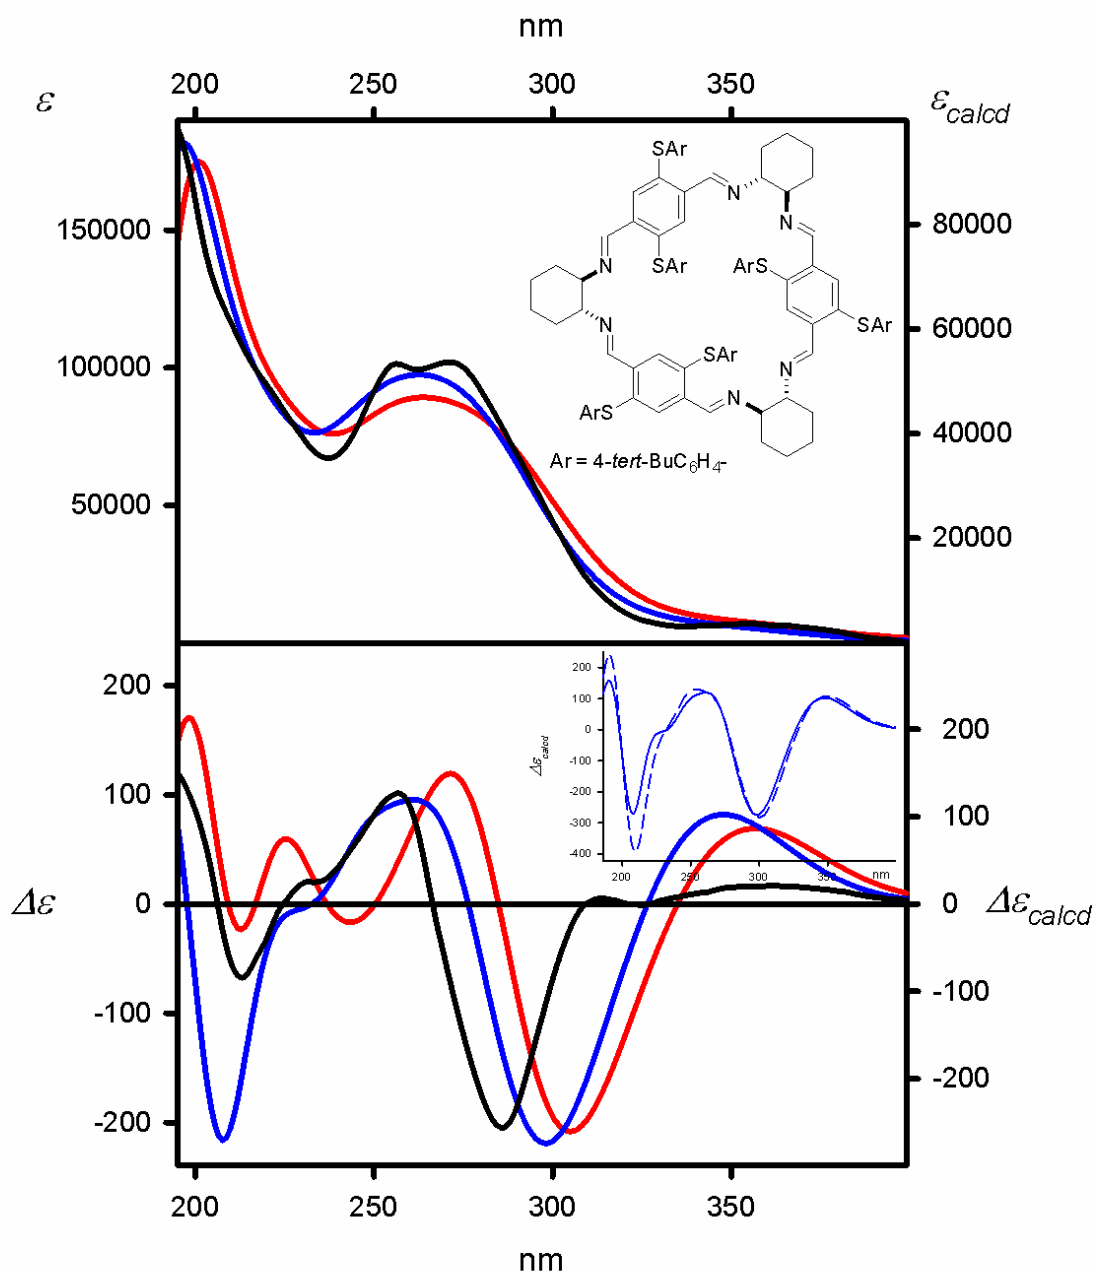

Experimental (cyclohexane, black lines)

Calculated at the  
 TD-CAM-B3LYP/6-311G(d,p) level and:  
 $\Delta E$ -based Boltzmann averaged (red lines)  
 $\Delta\Delta G$ -based Boltzmann averaged (blue lines)  
 Geometry optimized at the  
 B3LYP/6-31G(d,p) level

**Figure S38.** UV (upper panel) and ECD (lower panel) spectra of **6c** measured in cyclohexane (solid black lines) and calculated at the TD-CAM-B3LYP/6-311G(d,p) level for geometries optimized at the B3LYP/6-31G(d,p) level. The calculated ECD spectra were Boltzmann-averaged based on  $\Delta E$  (red lines) and  $\Delta\Delta G$  values (blue lines). Wavelengths were corrected to match the experimental UV maxima. The insert shows the comparison between the ECD spectra calculated for the lowest energy conformer of a given compound (dashed blue lines) and the  $\Delta\Delta G$ -based and Boltzmann averaged (solid blue lines).

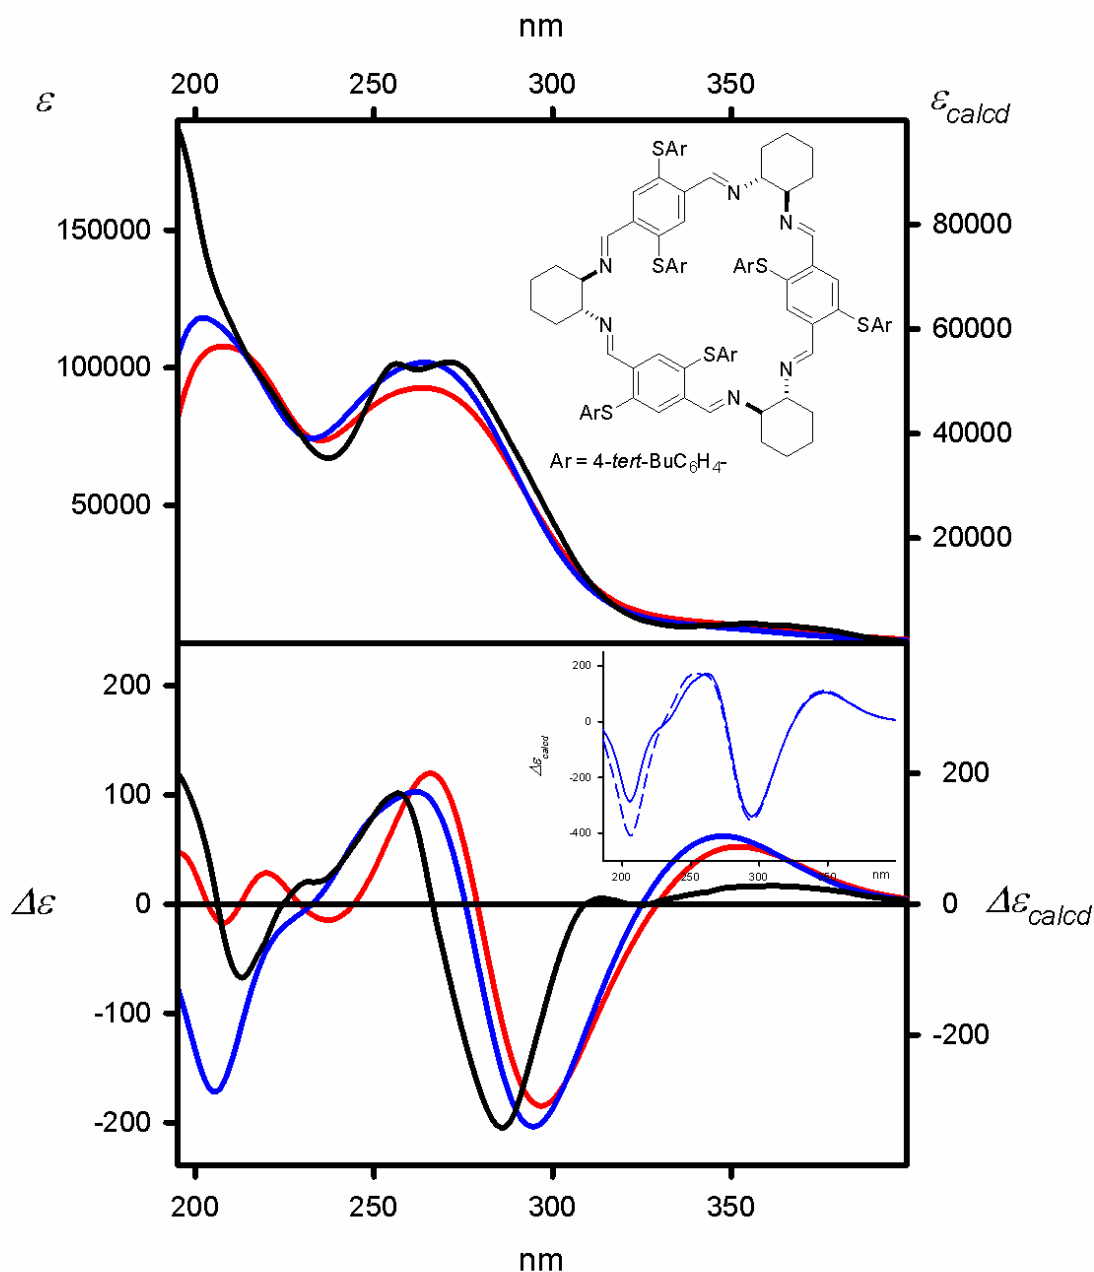

Experimental (cyclohexane, black lines)

Calculated at the  
 TD-M06-2X/6-311G(d,p) level and:  
 $\Delta E$ -based Boltzmann averaged (red lines)  
 $\Delta \Delta G$ -based Boltzmann averaged (blue lines)  
 Geometry optimized at the  
 B3LYP/6-31G(d,p) level

**Figure S39.** UV (upper panel) and ECD (lower panel) spectra of **6c** measured in cyclohexane (solid black lines) and calculated at the TD-M06-2X/6-311G(d,p) level for geometries optimized at the B3LYP/6-31G(d,p) level. The calculated ECD spectra were Boltzmann-averaged based on  $\Delta E$  (red lines) and  $\Delta \Delta G$  values (blue lines). Wavelengths were corrected to match the experimental UV maxima. The insert shows the comparison between the ECD spectra calculated for the lowest energy conformer of a given compound (dashed blue lines) and the  $\Delta \Delta G$ -based and Boltzmann averaged (solid blue lines).

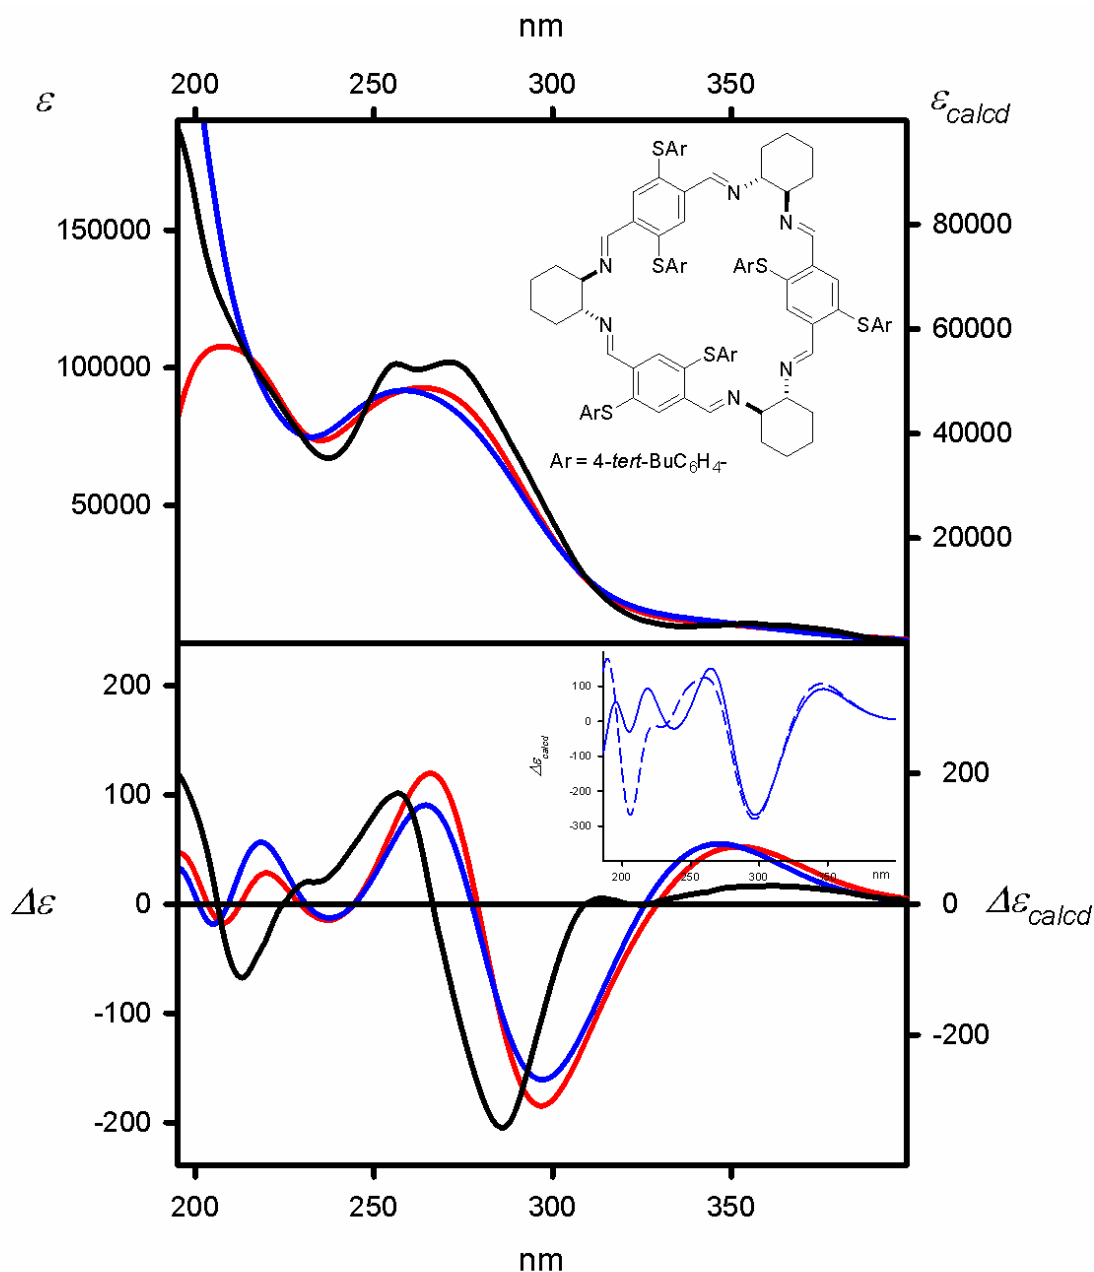

Experimental (cyclohexane, black lines)

Calculated at the  
TD-wB97XD/6-311G(d,p) level and:

$\Delta E$ -based Boltzmann averaged (red lines)

$\Delta\Delta G$ -based Boltzmann averaged (blue lines)

Geometry optimized at the  
B3LYP/6-31G(d,p) level

**Figure S40.** UV (upper panel) and ECD (lower panel) spectra of **6c** measured in cyclohexane (solid black lines) and calculated at the TD-wB97XD/6-311G(d,p) level for geometries optimized at the B3LYP/6-31G(d,p) level. The calculated ECD spectra were Boltzmann-averaged based on  $\Delta E$  (red lines) and  $\Delta\Delta G$  values (blue lines). Wavelengths were corrected to match the experimental UV maxima. The insert shows the comparison between the ECD spectra calculated for the lowest energy conformer of a given compound (dashed blue lines) and the  $\Delta\Delta G$ -based and Boltzmann averaged (solid blue lines).

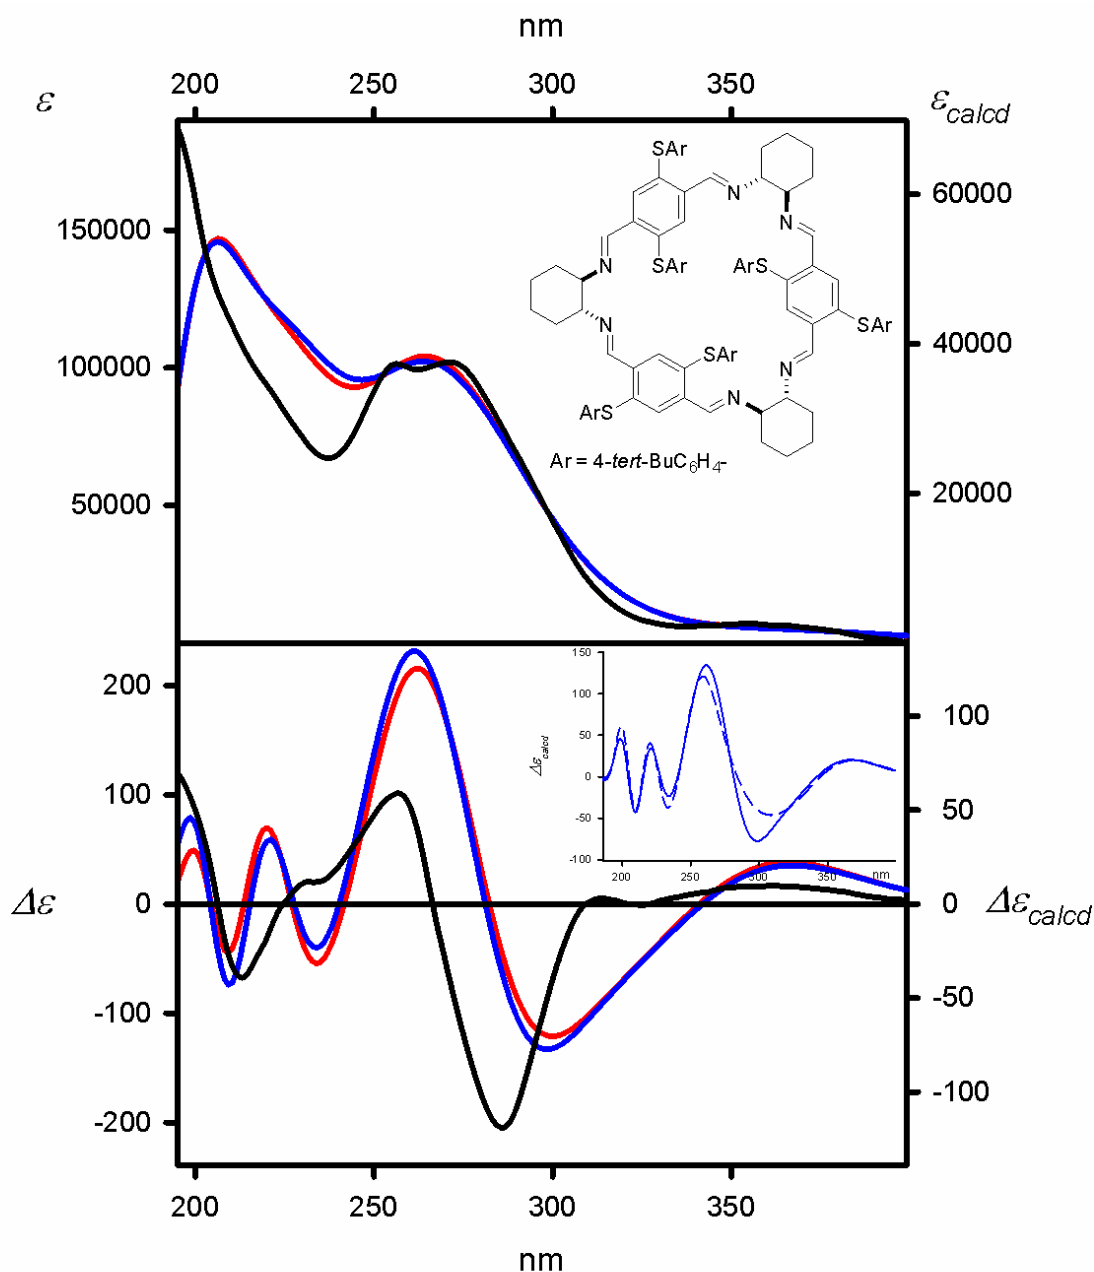

Experimental (cyclohexane, black lines)

Calculated at the  
 TD-CAM-B3LYP/6-311G(d,p) level and:  
 $\Delta E$ -based Boltzmann averaged (red lines)  
 $\Delta\Delta G$ -based Boltzmann averaged (blue lines)  
 Geometry optimized at the  
 B3LYP-GD3BJ/6-31G(d,p) level

**Figure S41.** UV (upper panel) and ECD (lower panel) spectra of **6c** measured in cyclohexane (solid black lines) and calculated at the TD-CAM-B3LYP/6-311G(d,p) level for geometries optimized at the B3LYP-GD3BJ/6-31G(d,p) level. The calculated ECD spectra were Boltzmann-averaged based on  $\Delta E$  (red lines) and  $\Delta\Delta G$  values (blue lines). Wavelengths were corrected to match the experimental UV maxima. The insert shows the comparison between the ECD spectra calculated for the lowest energy conformer of a given compound (dashed blue lines) and the  $\Delta\Delta G$ -based and Boltzmann averaged (solid blue lines).



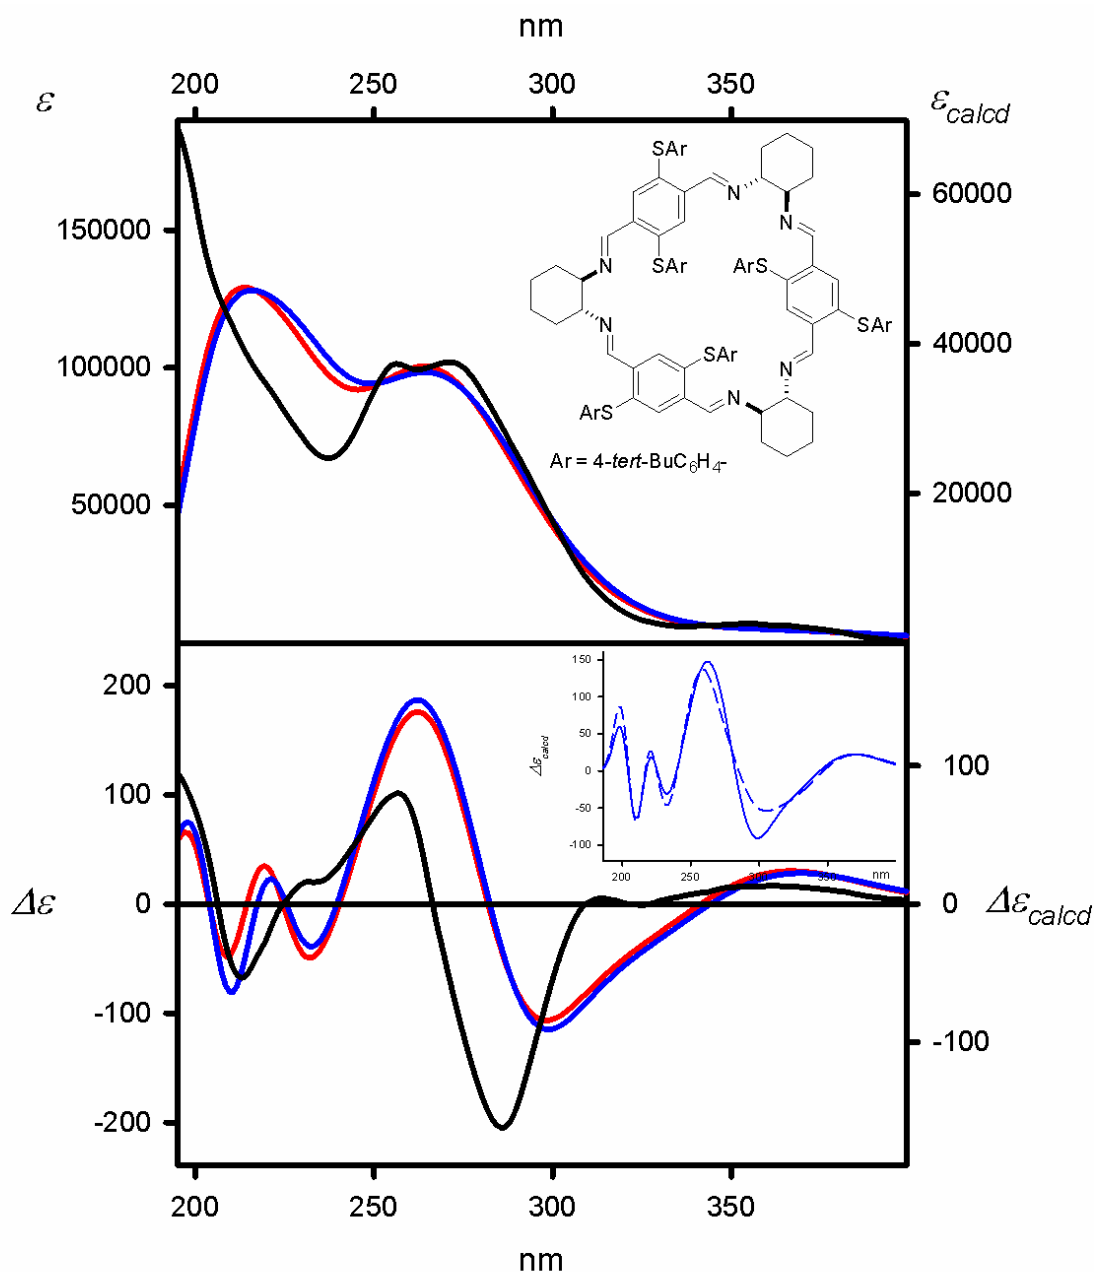

**Figure S42.** UV (upper panel) and ECD (lower panel) spectra of **6c** measured in cyclohexane (solid black lines) and calculated at the TD-M06-2X/6-311G(d,p) level for geometries optimized at the B3LYP-GD3BJ/6-31G(d,p) level. The calculated ECD spectra were Boltzmann-averaged based on  $\Delta E$  (red lines) and  $\Delta\Delta G$  values (blue lines). Wavelengths were corrected to match the experimental UV maxima. The insert shows the comparison between the ECD spectra calculated for the lowest energy conformer of a given compound (dashed blue lines) and the  $\Delta\Delta G$ -based and Boltzmann averaged (solid blue lines).

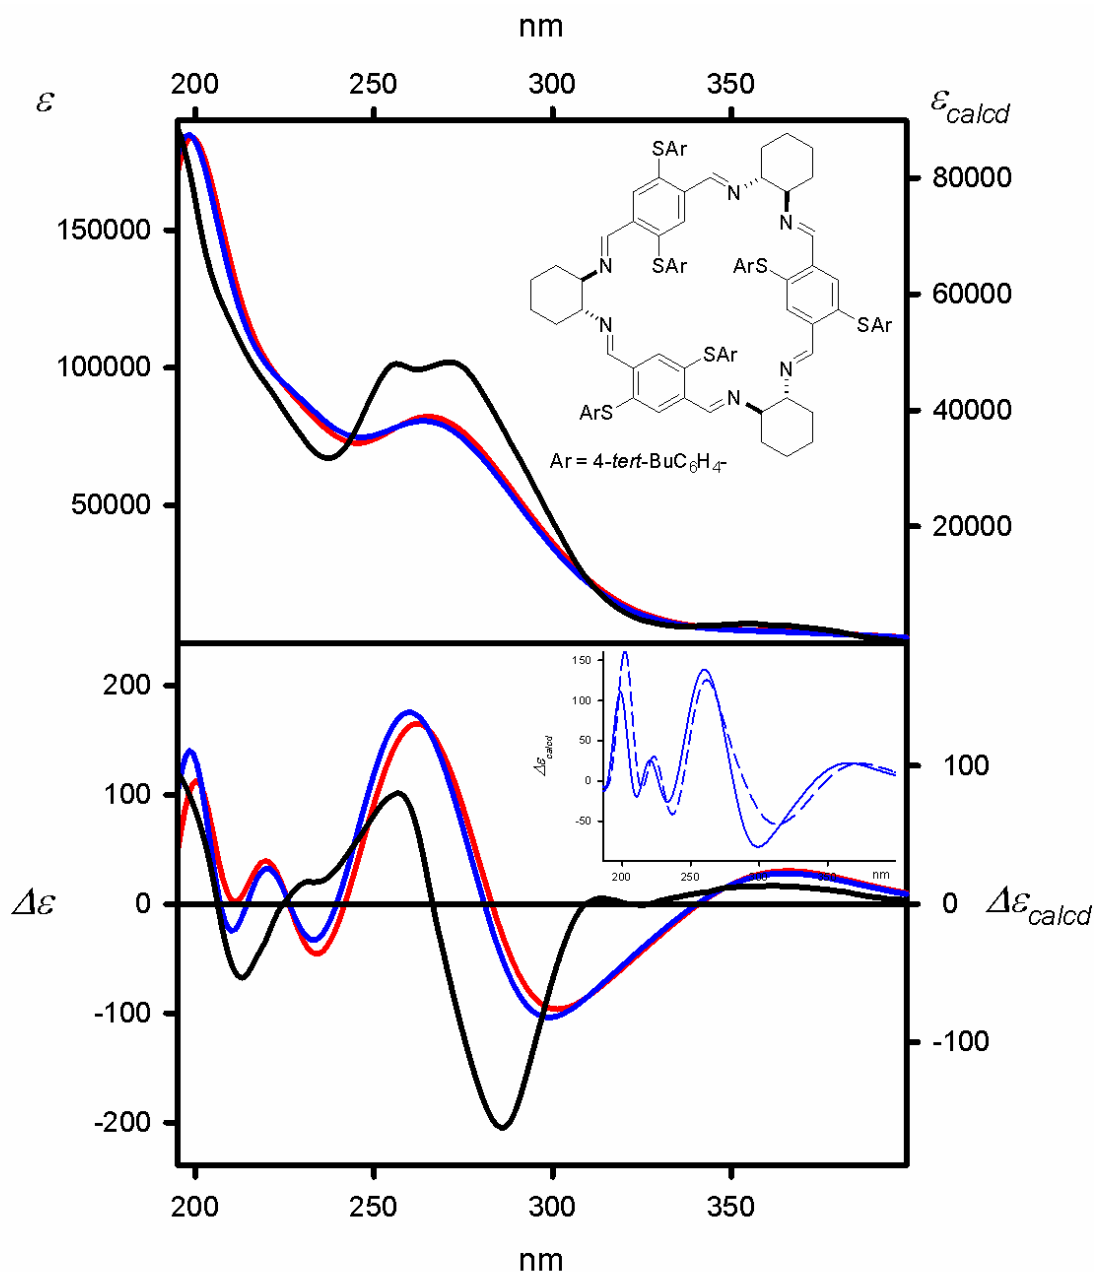

**Figure S43.** UV (upper panel) and ECD (lower panel) spectra of **6c** measured in cyclohexane (solid black lines) and calculated at the TD-wB97XD/6-311G(d,p) level for geometries optimized at the B3LYP-GD3BJ/6-31G(d,p) level. The calculated ECD spectra were Boltzmann-averaged based on  $\Delta E$  (red lines) and  $\Delta\Delta G$  values (blue lines). Wavelengths were corrected to match the experimental UV maxima. The insert shows the comparison between the ECD spectra calculated for the lowest energy conformer of a given compound (dashed blue lines) and the  $\Delta\Delta G$ -based and Boltzmann averaged (solid blue lines).

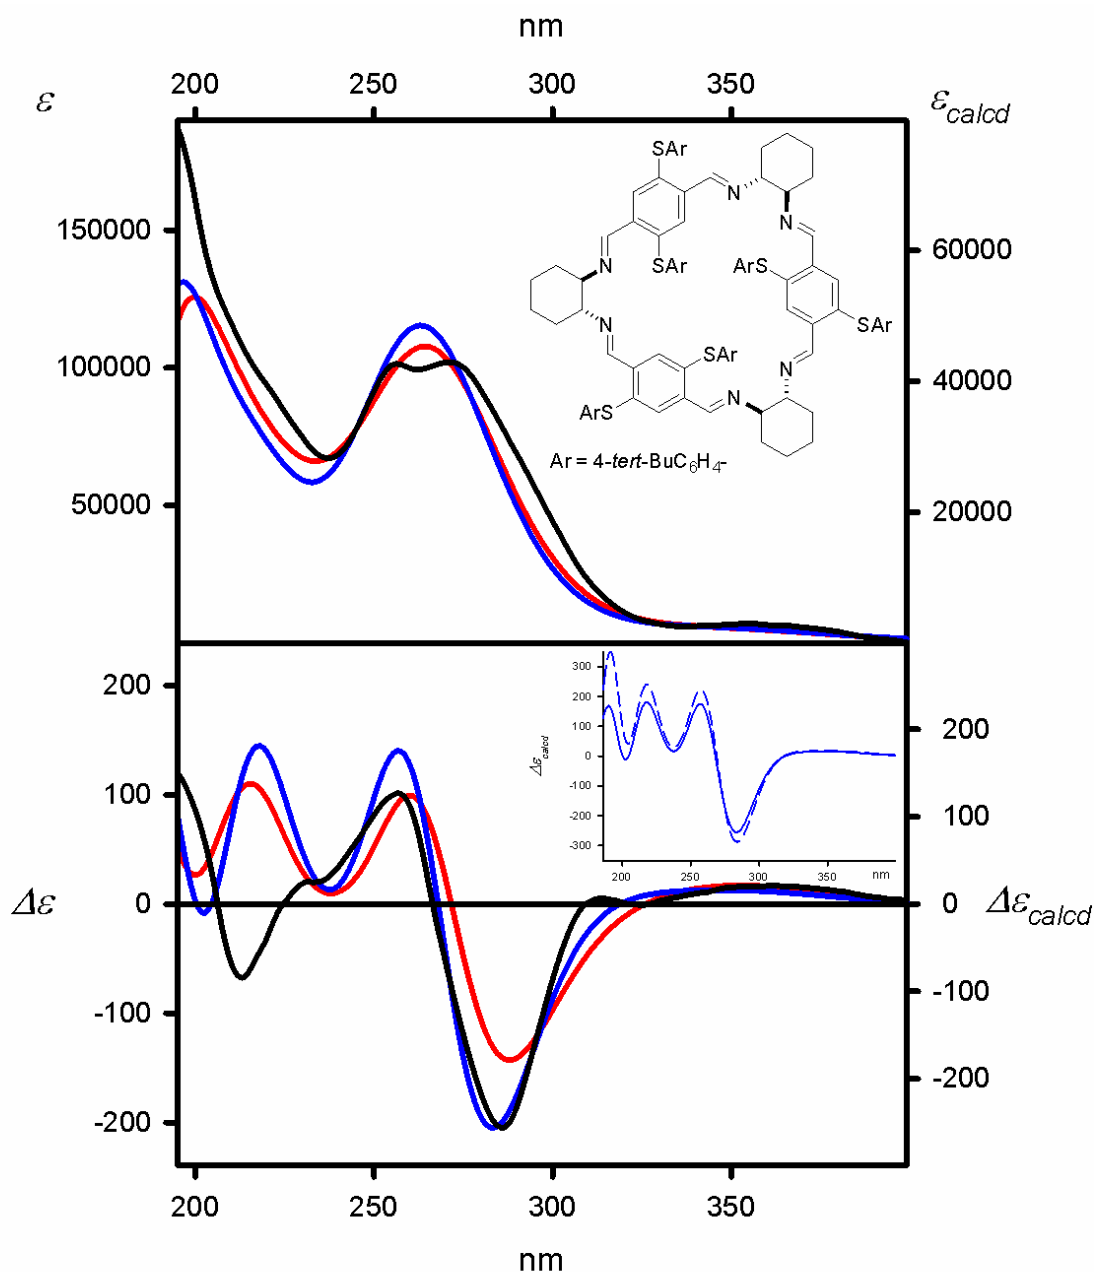

Experimental (cyclohexane, black lines)

Calculated at the  
 TD-CAM-B3LYP/6-311G(d,p) level and:  
 $\Delta E$ -based Boltzmann averaged (red lines)  
 $\Delta\Delta G$ -based Boltzmann averaged (blue lines)  
 Geometry optimized at the  
 M06L/6-31G(d,p) level

**Figure S44.** UV (upper panel) and ECD (lower panel) spectra of **6c** measured in cyclohexane (solid black lines) and calculated at the TD-CAM-B3LYP/6-311G(d,p) level for geometries optimized at the M06L/6-31G(d,p) level. The calculated ECD spectra were Boltzmann-averaged based on  $\Delta E$  (red lines) and  $\Delta\Delta G$  values (blue lines). Wavelengths were corrected to match the experimental UV maxima. The insert shows the comparison between the ECD spectra calculated for the lowest energy conformer of a given compound (dashed blue lines) and the  $\Delta\Delta G$ -based and Boltzmann averaged (solid blue lines).

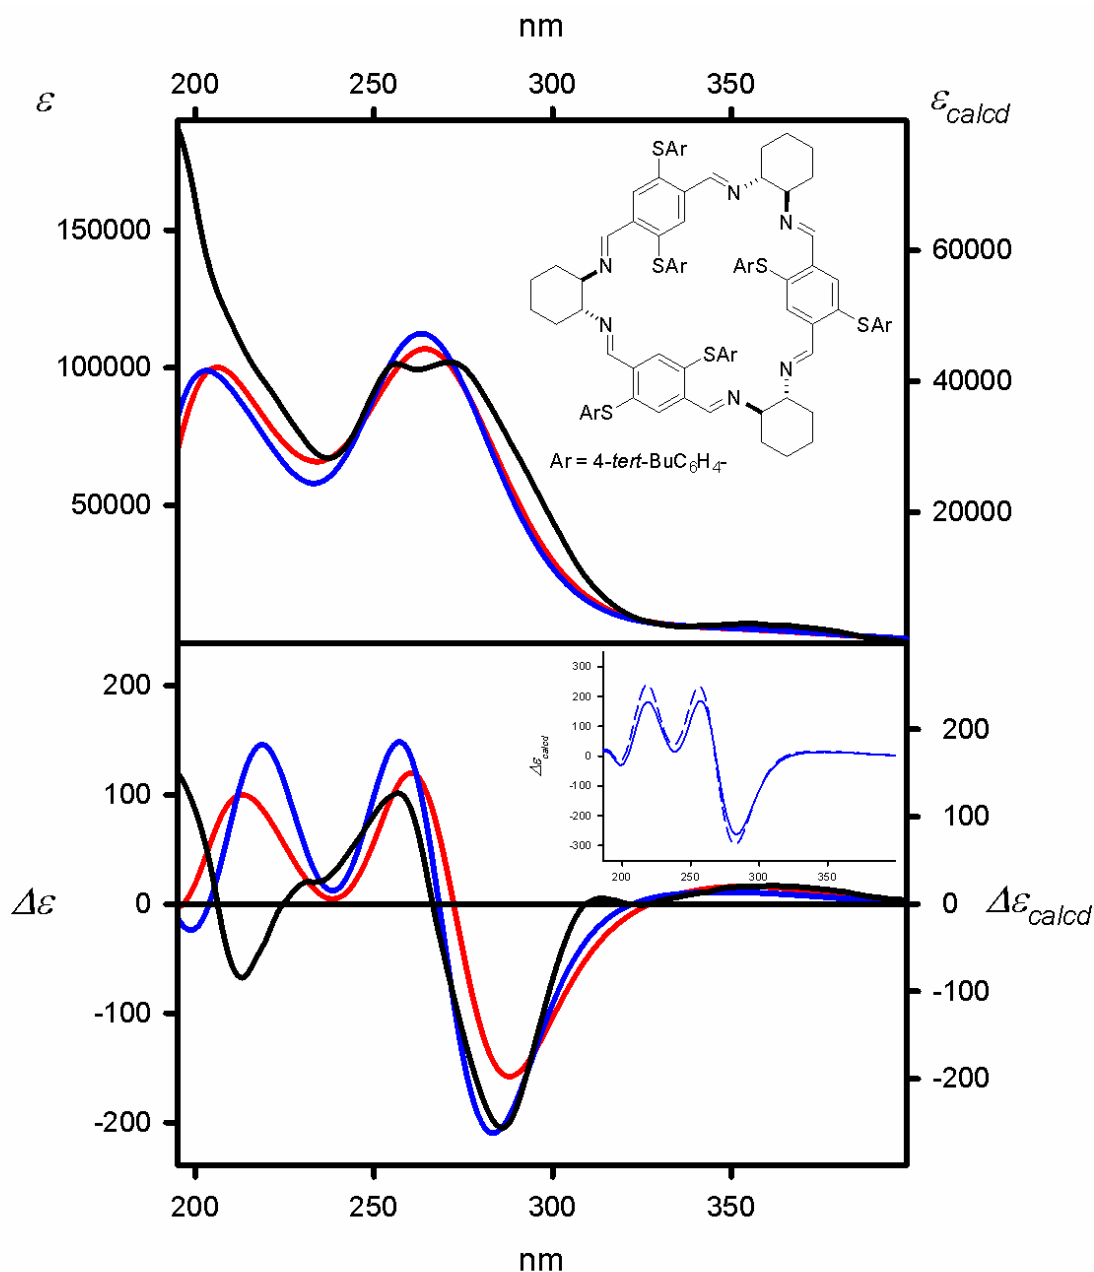

Experimental (cyclohexane, black lines)

Calculated at the  
 TD-M06-2X/6-311G(d,p) level and:  
 $\Delta E$ -based Boltzmann averaged (red lines)  
 $\Delta \Delta G$ -based Boltzmann averaged (blue lines)  
 Geometry optimized at the  
 M06L/6-31G(d,p) level

**Figure S45.** UV (upper panel) and ECD (lower panel) spectra of **6c** measured in cyclohexane (solid black lines) and calculated at the TD-M06-2X/6-311G(d,p) level for geometries optimized at the M06L/6-31G(d,p) level. The calculated ECD spectra were Boltzmann-averaged based on  $\Delta E$  (red lines) and  $\Delta \Delta G$  values (blue lines). Wavelengths were corrected to match the experimental UV maxima. The insert shows the comparison between the ECD spectra calculated for the lowest energy conformer of a given compound (dashed blue lines) and the  $\Delta \Delta G$ -based and Boltzmann averaged (solid blue lines).

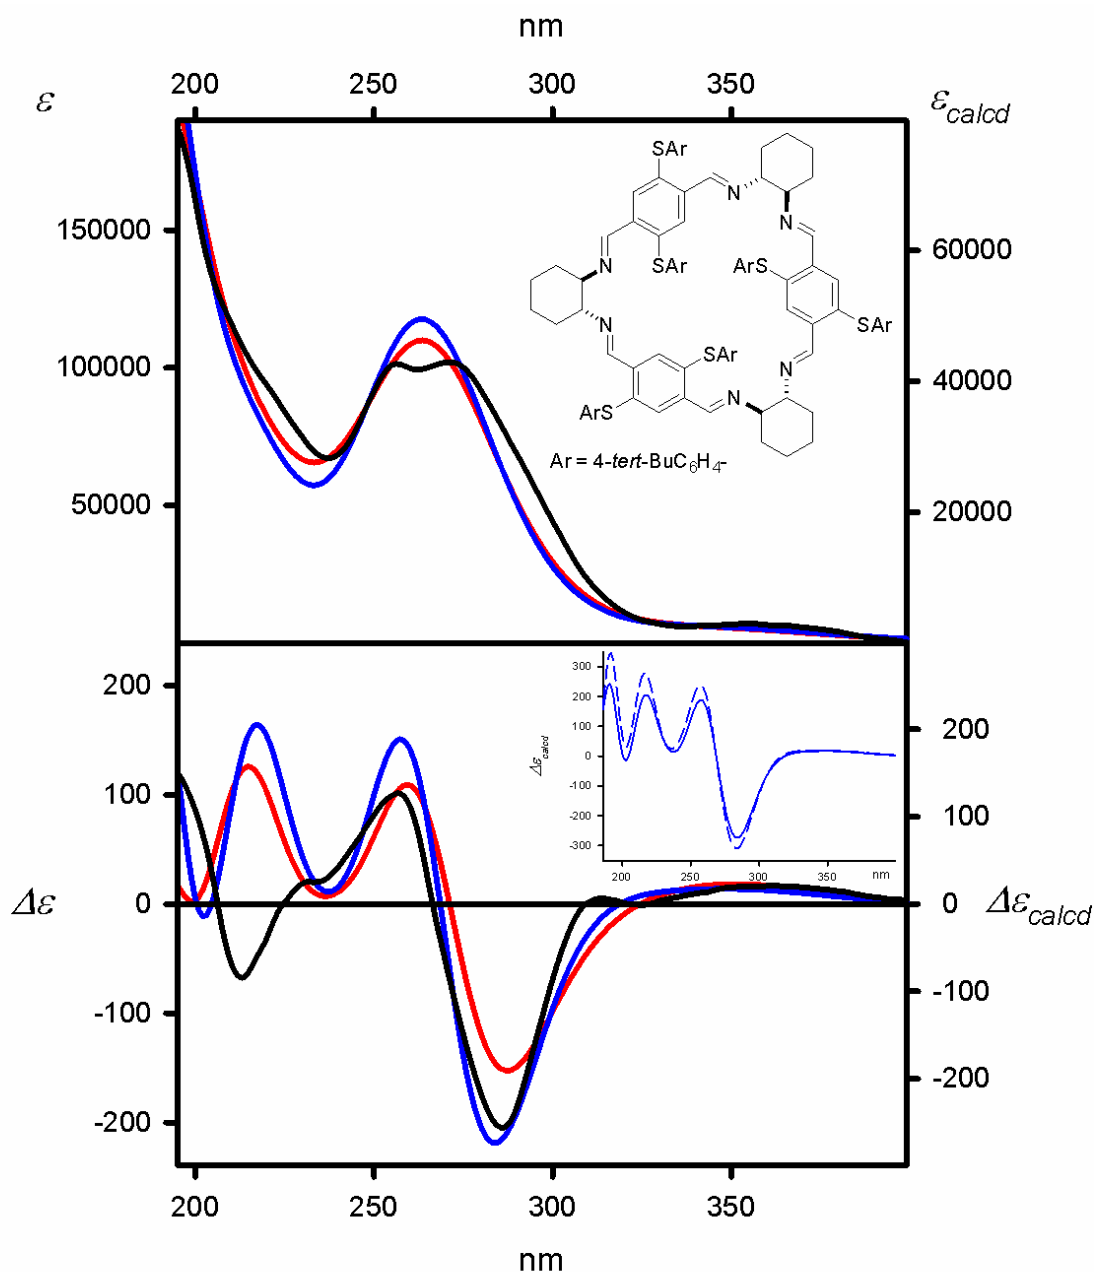

Experimental (cyclohexane, black lines)

Calculated at the  
TD-wB97XD/6-311G(d,p) level and:

$\Delta E$ -based Boltzmann averaged (red lines)

$\Delta\Delta G$ -based Boltzmann averaged (blue lines)

Geometry optimized at the

M06L/6-31G(d,p) level

**Figure S46.** UV (upper panel) and ECD (lower panel) spectra of **6c** measured in cyclohexane (solid black lines) and calculated at the TD-wB97XD/6-311G(d,p) level for geometries optimized at the M06L/6-31G(d,p) level. The calculated ECD spectra were Boltzmann-averaged based on  $\Delta E$  (red lines) and  $\Delta\Delta G$  values (blue lines). Wavelengths were corrected to match the experimental UV maxima. The insert shows the comparison between the ECD spectra calculated for the lowest energy conformer of a given compound (dashed blue lines) and the  $\Delta\Delta G$ -based and Boltzmann averaged (solid blue lines).

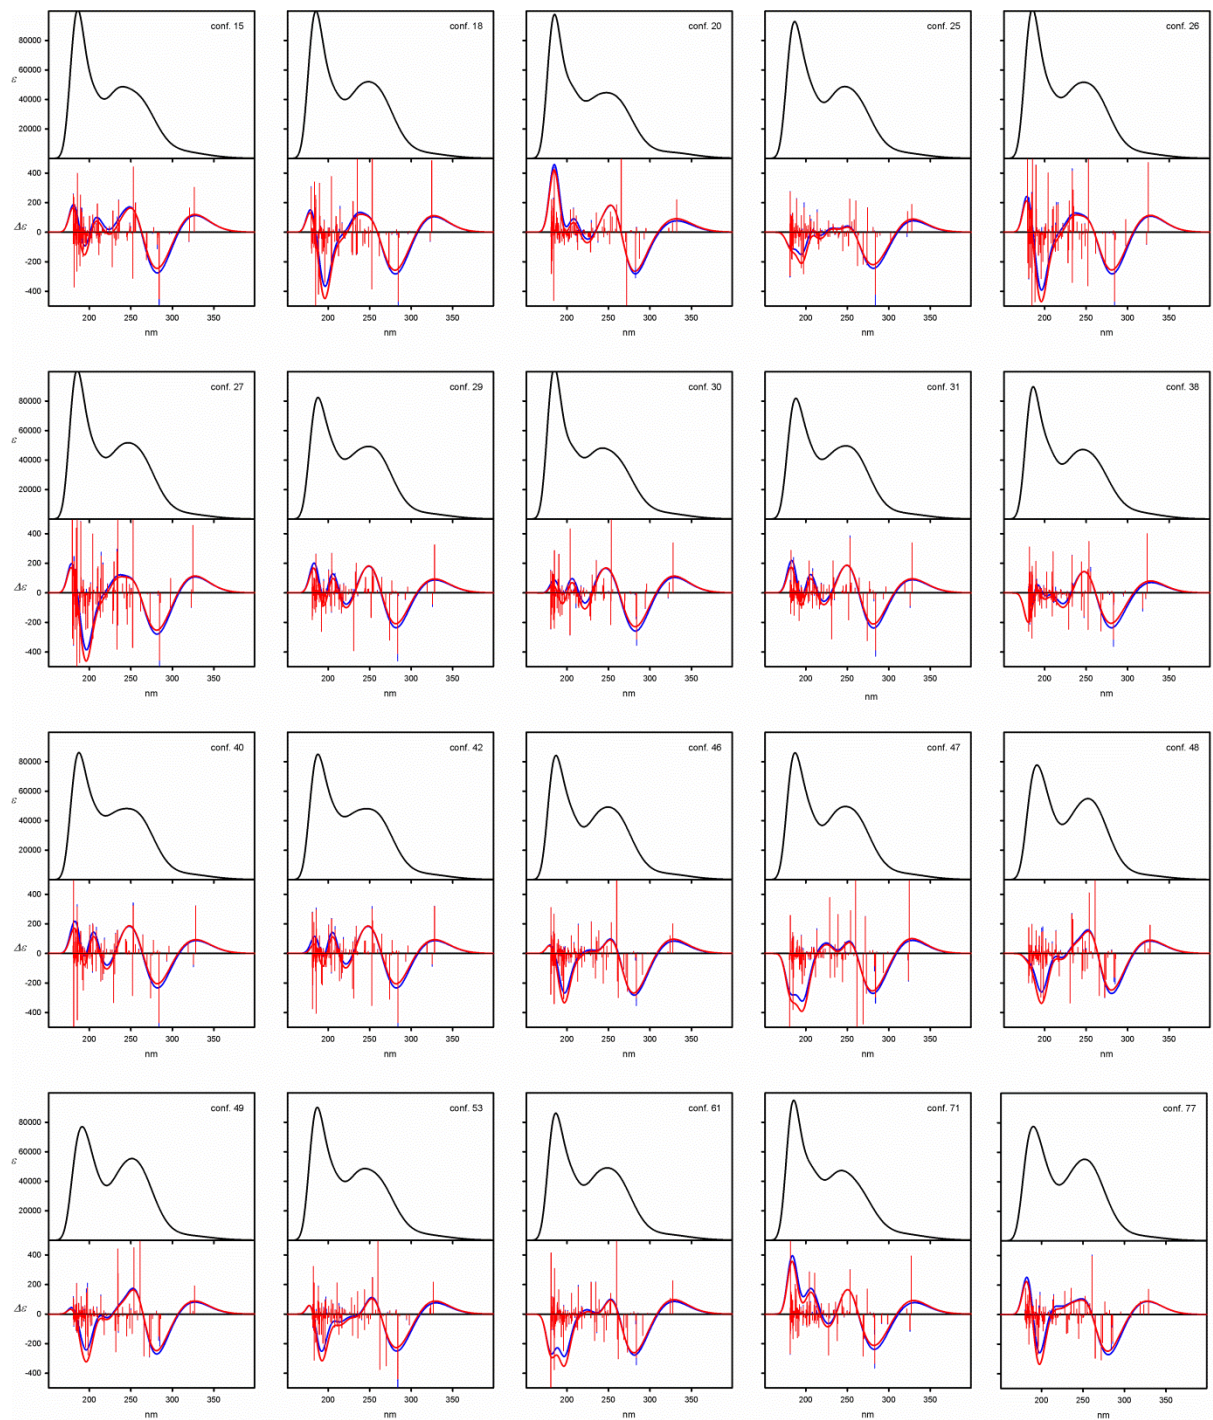



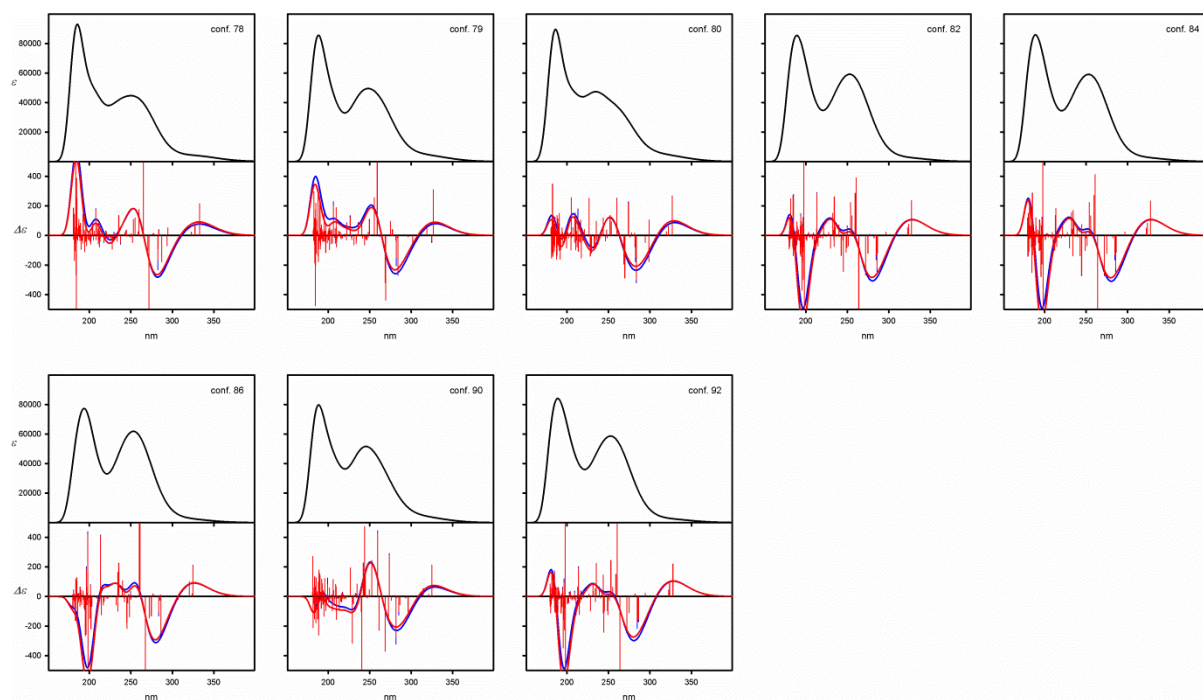

**Figure S47.** UV (upper panels) and ECD (lower panels) spectra calculated at the TD-CAM-B3LYP/6-311G(d,p) level for individual low-energy conformers of **6c**. Wavelengths were not corrected. Geometries were optimized at the B3LYP/6-31G(d,p) level.

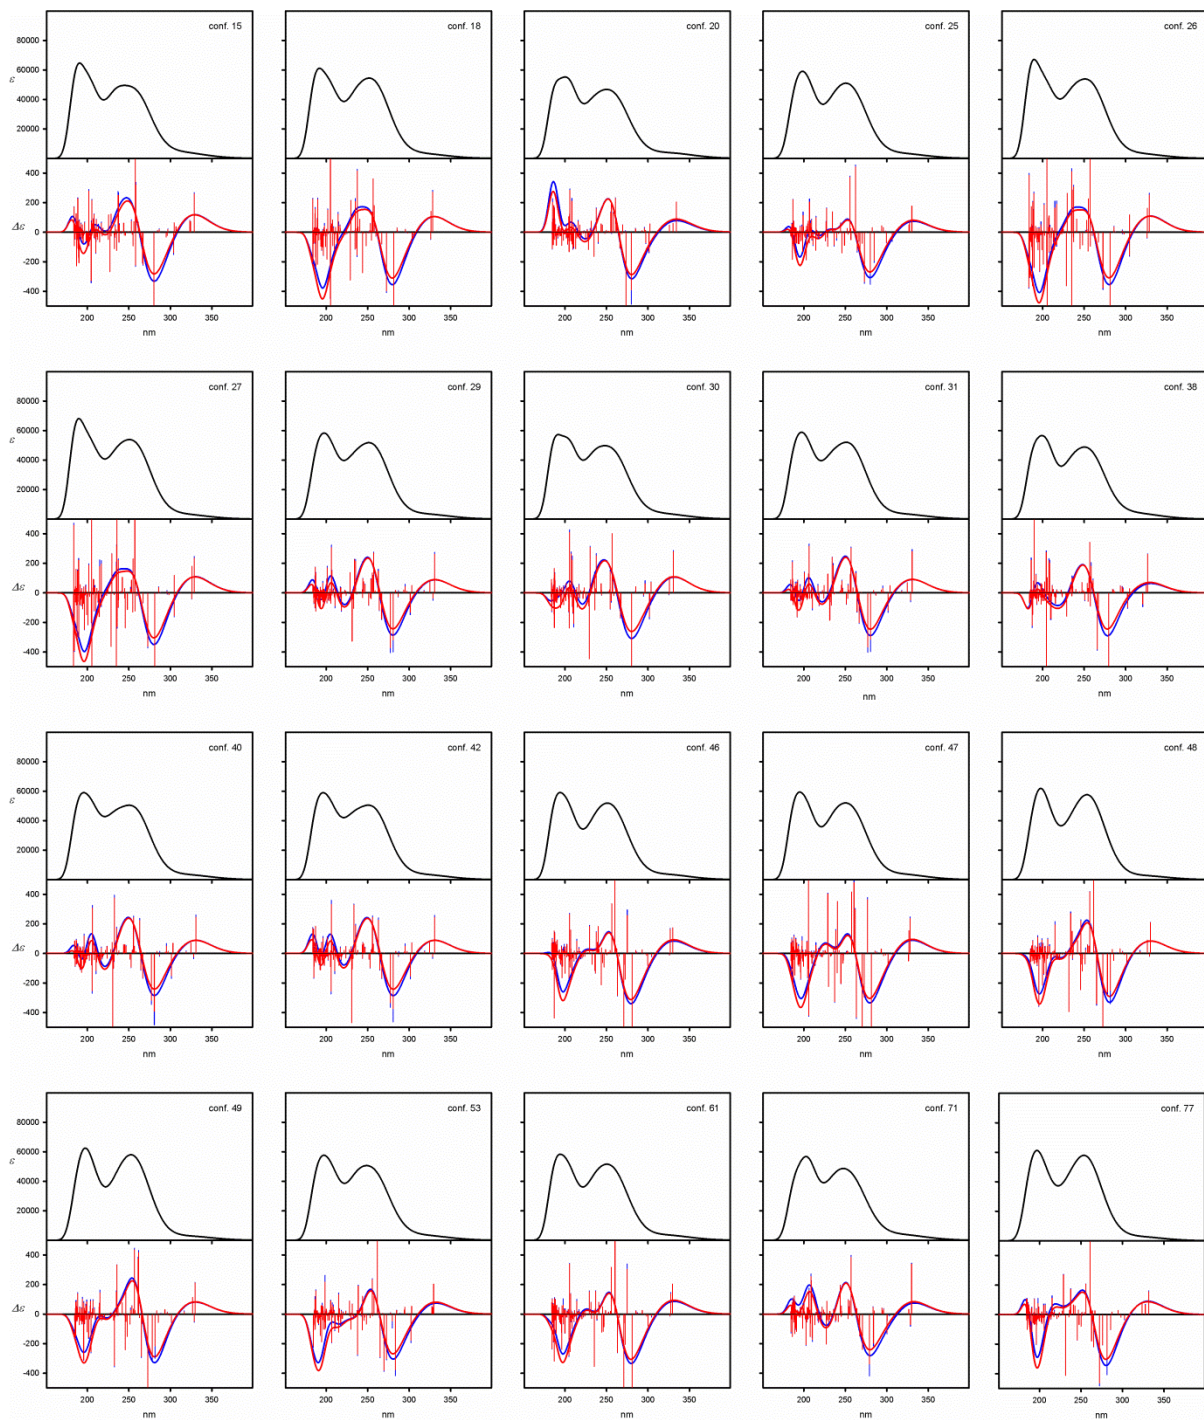



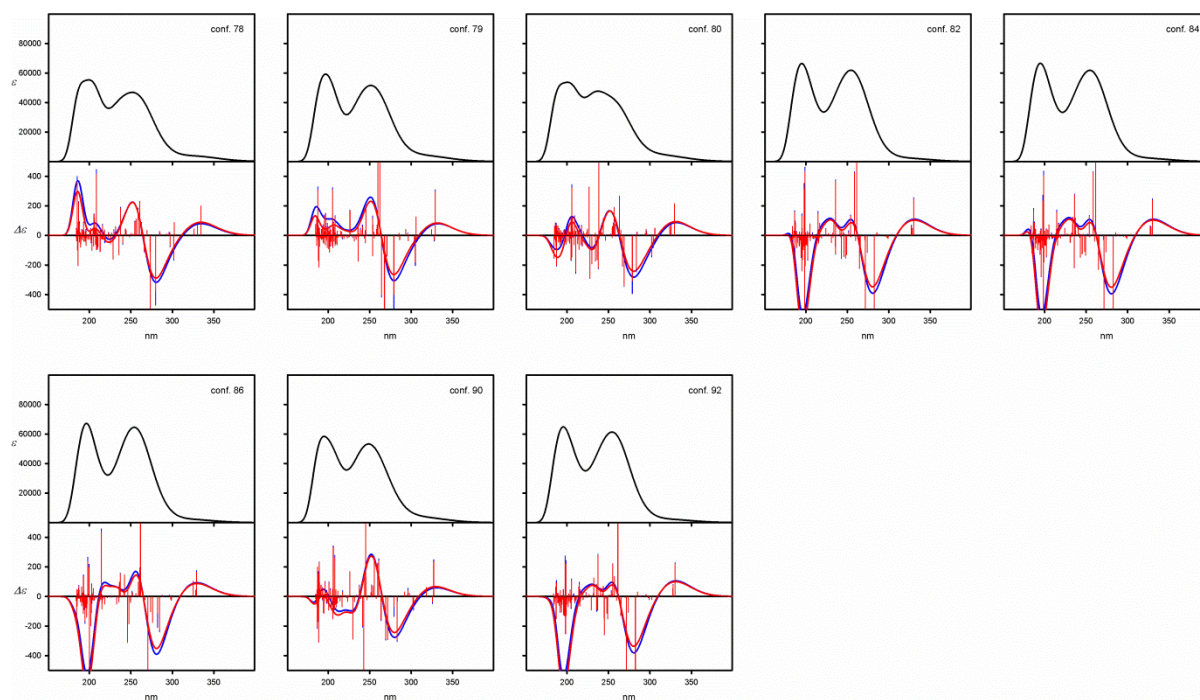

**Figure S48.** UV (upper panels) and ECD (lower panels) spectra calculated at the TD-M06-2X/6-311G(d,p) level for individual low-energy conformers of **6c**. Wavelengths were not corrected. Geometries were optimized at the B3LYP/6-31G(d,p) level.

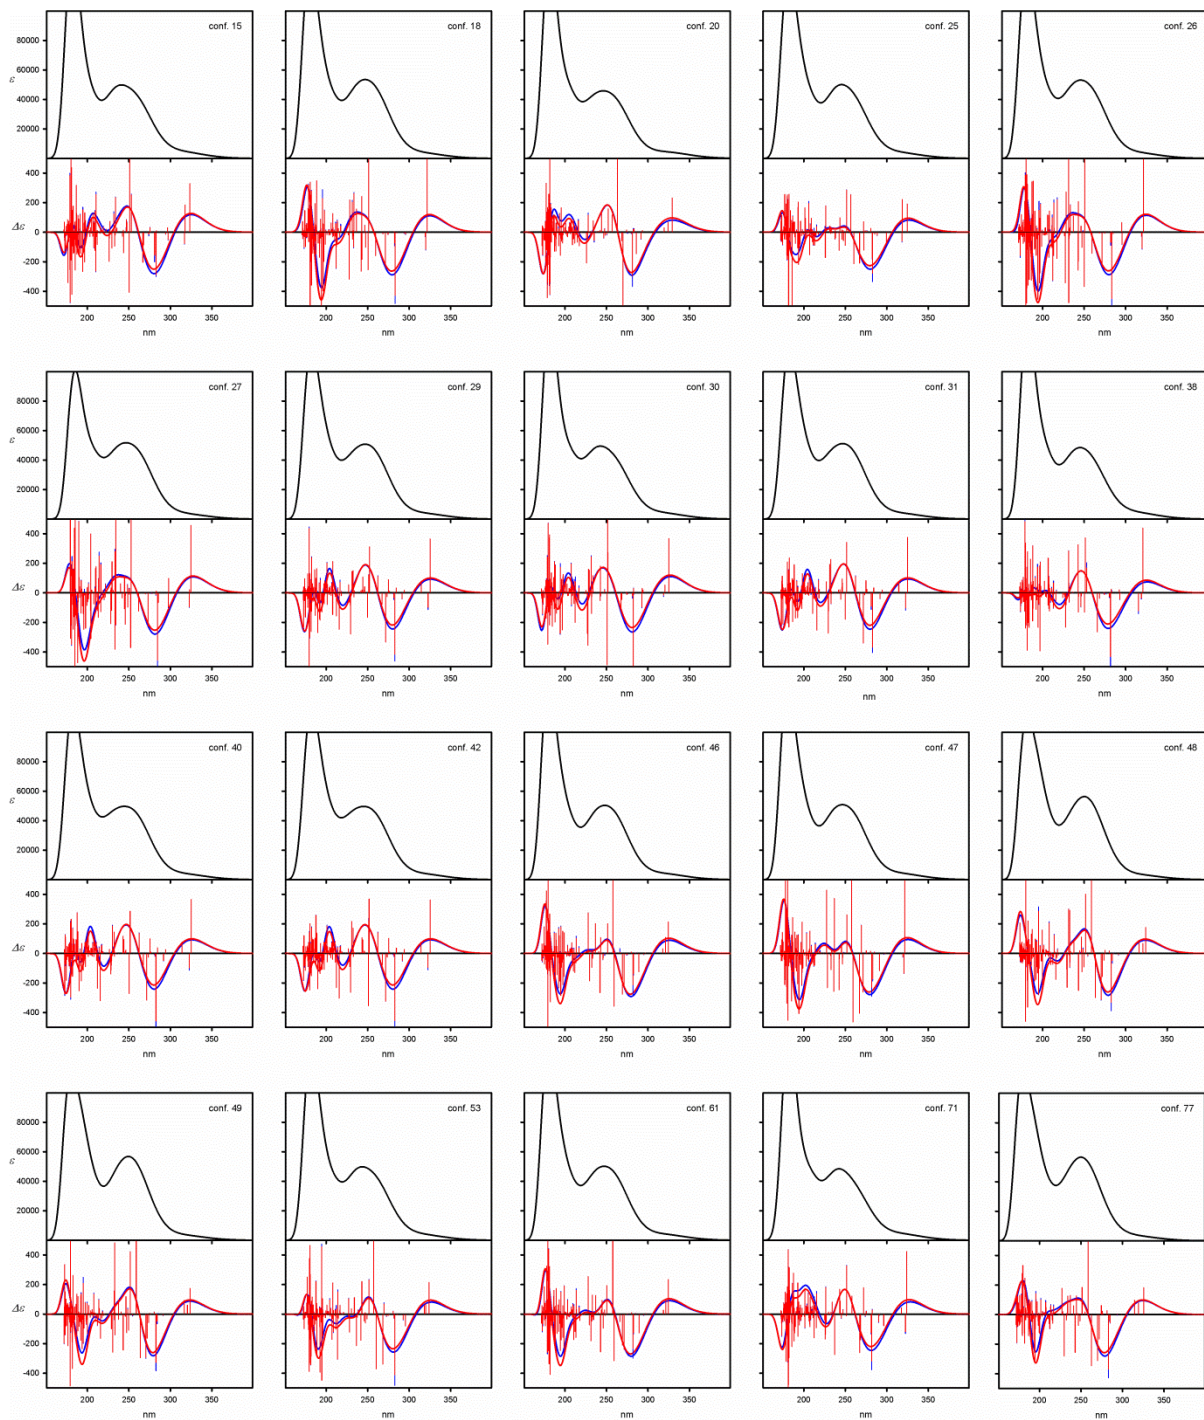



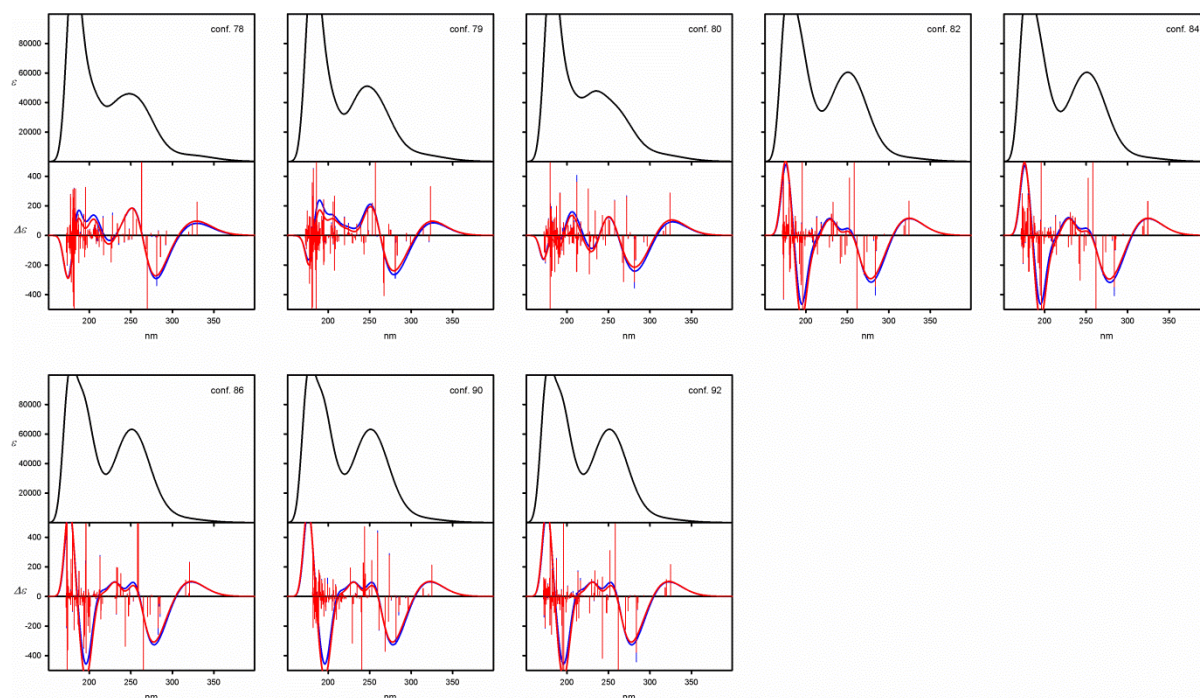

**Figure S49.** UV (upper panels) and ECD (lower panels) spectra calculated at the TD-wB97XD/6-311G(d,p) level for individual low-energy conformers of **6c**. Wavelengths were not corrected. Geometries were optimized at the B3LYP/6-31G(d,p) level.

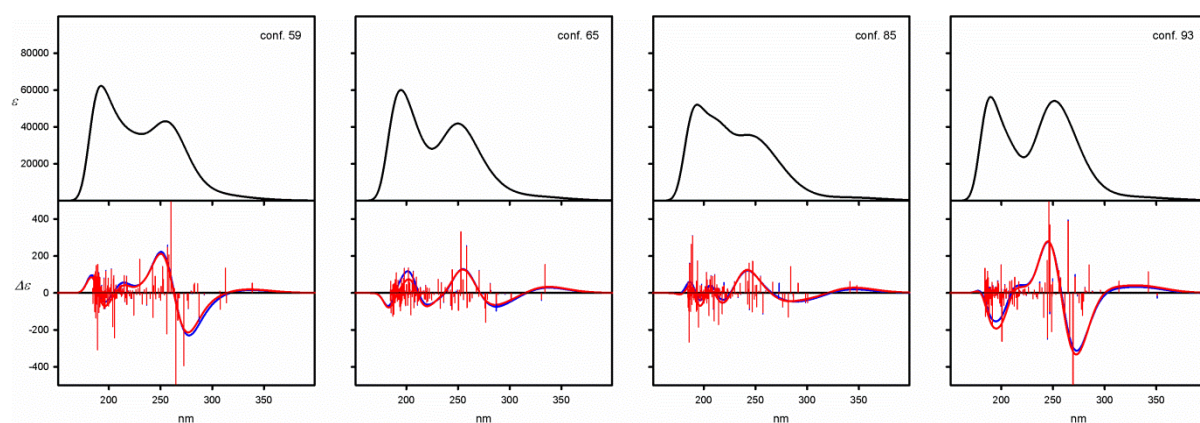

**Figure S50.** UV (upper panels) and ECD (lower panels) spectra calculated at the TD-CAM-B3LYP/6-311G(d,p) level for individual low-energy conformers of **6c**. Wavelengths were not corrected. Geometries were optimized at the B3LYP-GD3BJ/6-31G(d,p) level.

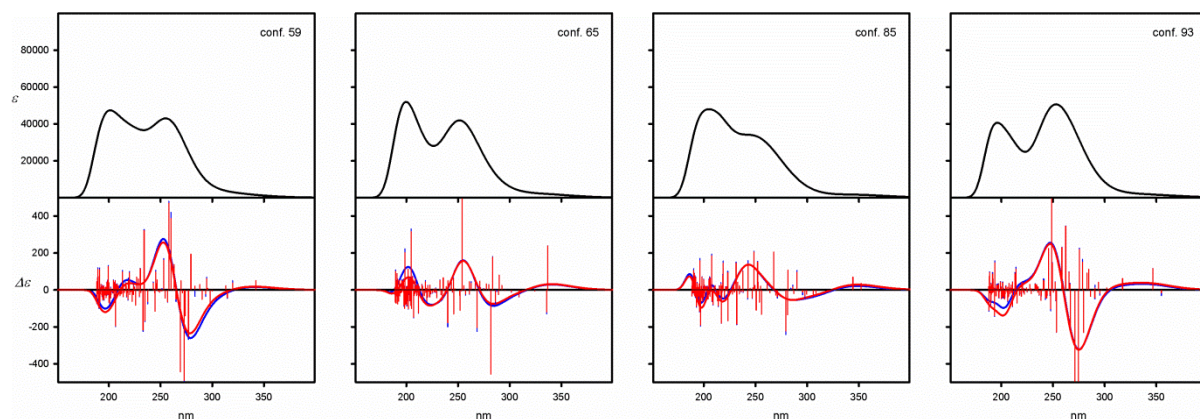



**Figure S51.** UV (upper panels) and ECD (lower panels) spectra calculated at the TD-M06-2X/6-311G(d,p) level for individual low-energy conformers of **6c**. Wavelengths were not corrected. Geometries were optimized at the B3LYP-GD3BJ/6-31G(d,p) level.

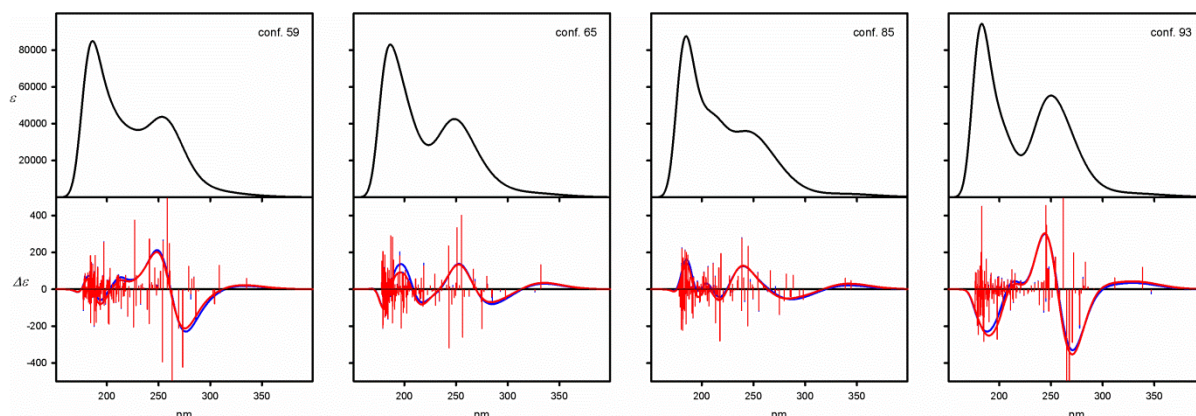

**Figure S52.** UV (upper panels) and ECD (lower panels) spectra calculated at the TD-wB97XD/6-311G(d,p) level for individual low-energy conformers of **6c**. Wavelengths were not corrected. Geometries were optimized at the B3LYP-GD3BJ/6-31G(d,p) level.

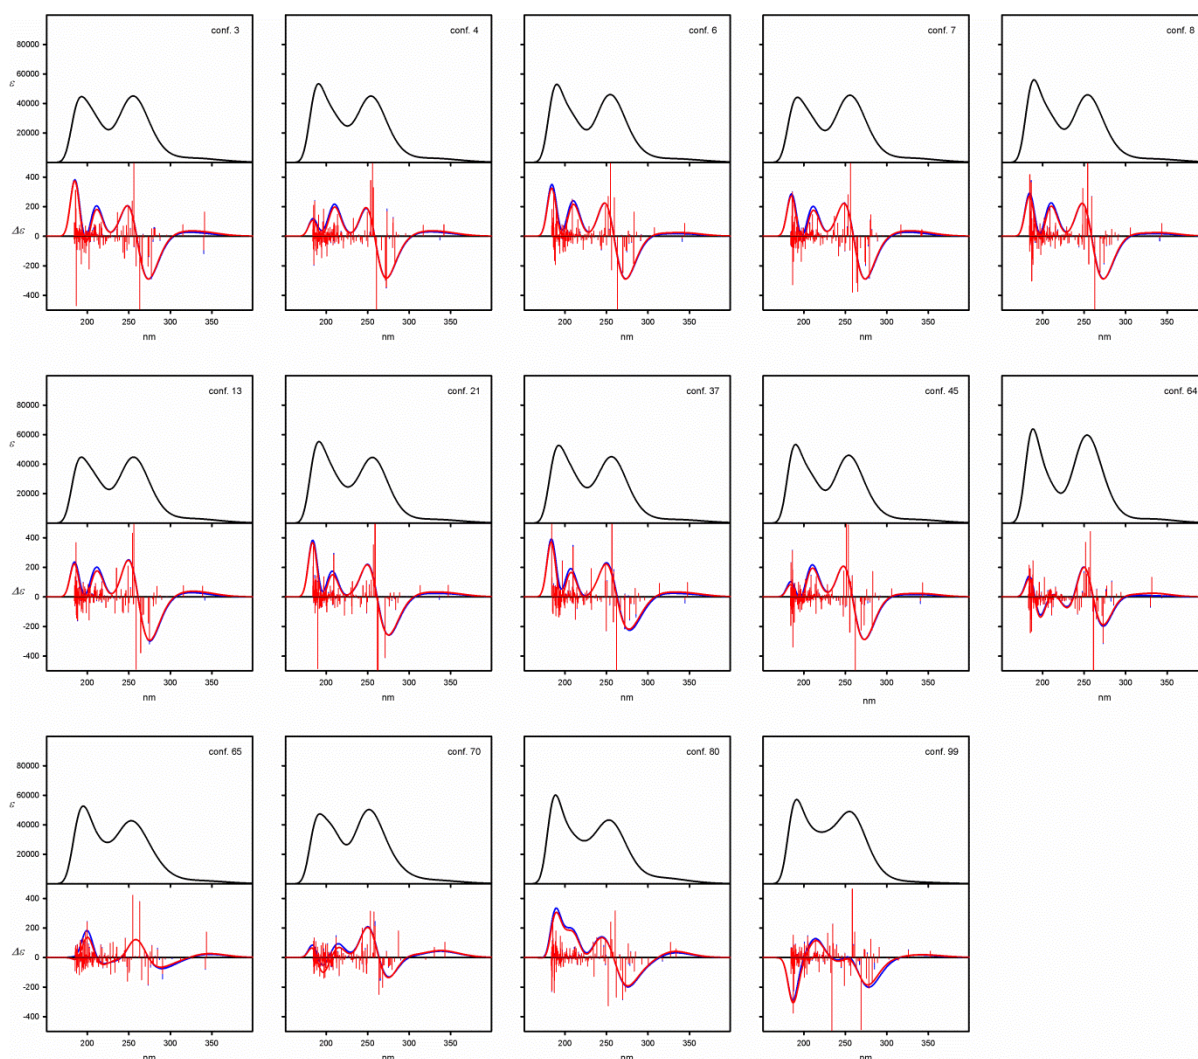

**Figure S53.** UV (upper panels) and ECD (lower panels) spectra calculated at the TD-CAM-B3LYP/6-311G(d,p) level for individual low-energy conformers of **6c**. Wavelengths were not corrected. Geometries were optimized at the M06L/6-31G(d,p) level.

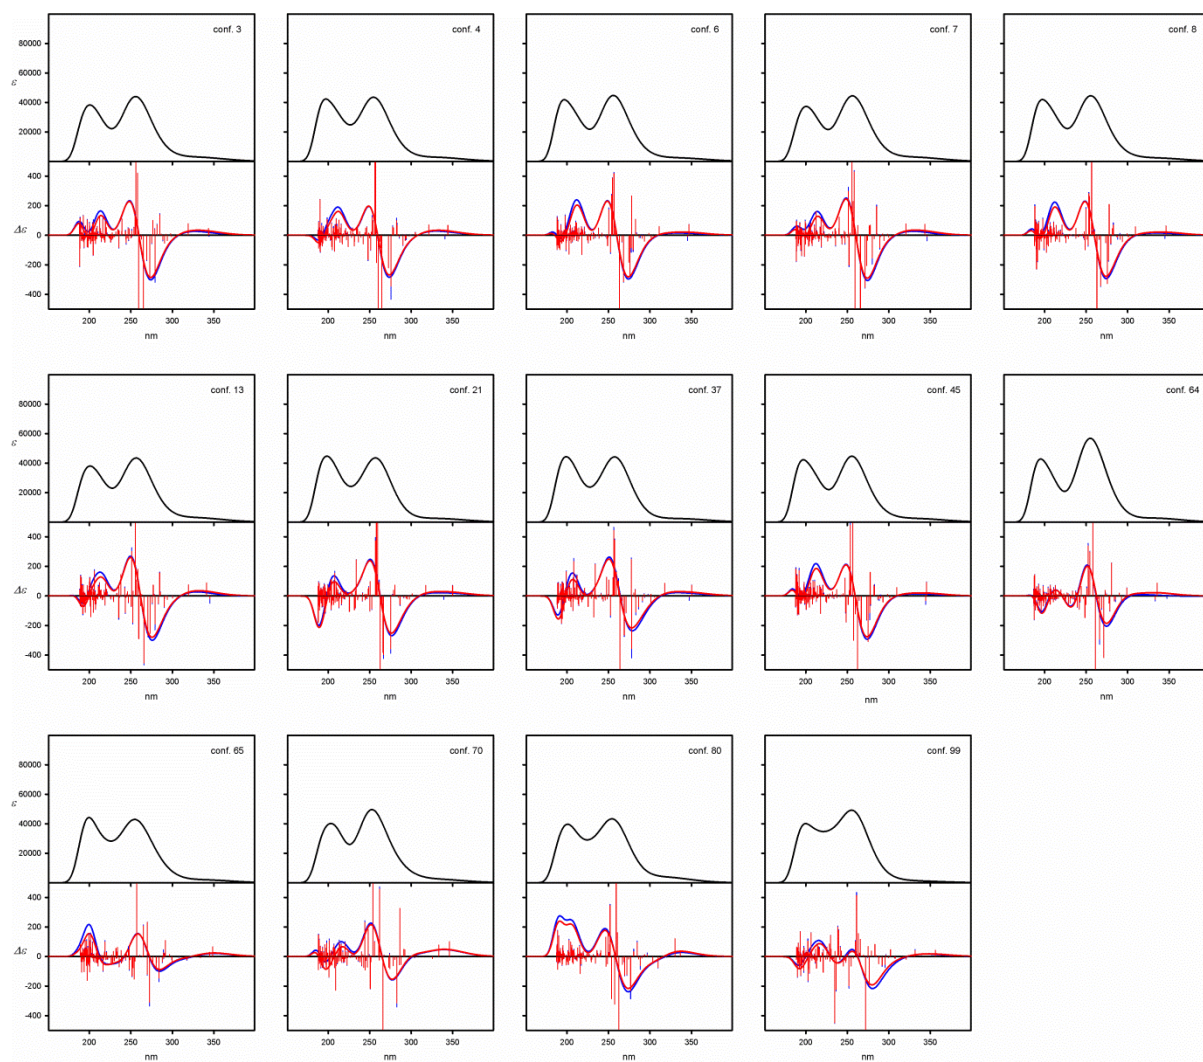

**Figure S54.** UV (upper panels) and ECD (lower panels) spectra calculated at the TD-M06-2X/6-311G(d,p) level for individual low-energy conformers of **6c**. Wavelengths were not corrected. Geometries were optimized at the M06L/6-31G(d,p) level.



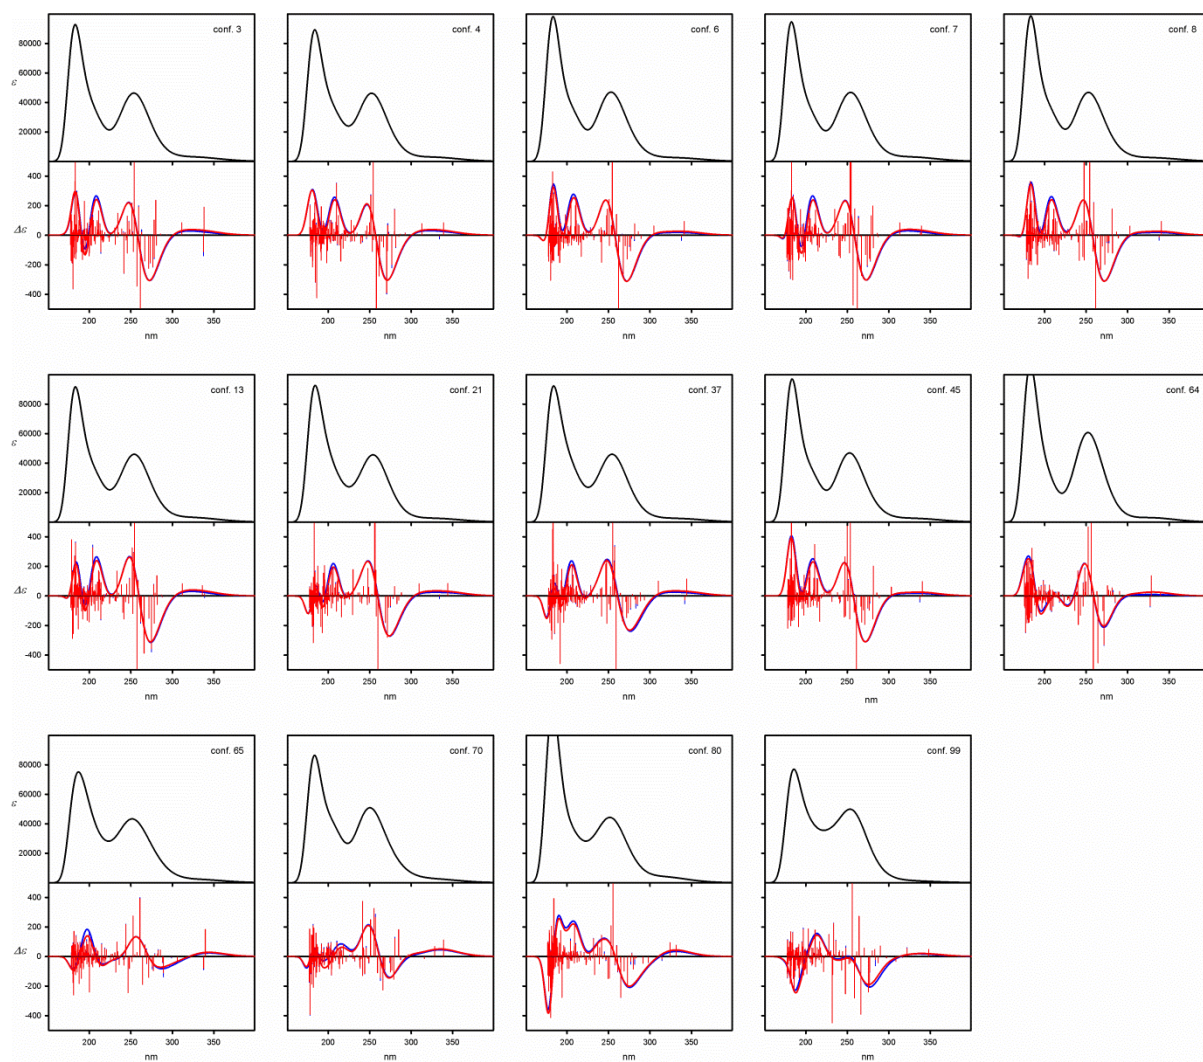

**Figure S55.** UV (upper panels) and ECD (lower panels) spectra calculated at the TD-wB97XD/6-311G(d,p) level for individual low-energy conformers of **6c**. Wavelengths were not corrected. Geometries were optimized at the M06L/6-31G(d,p) level.

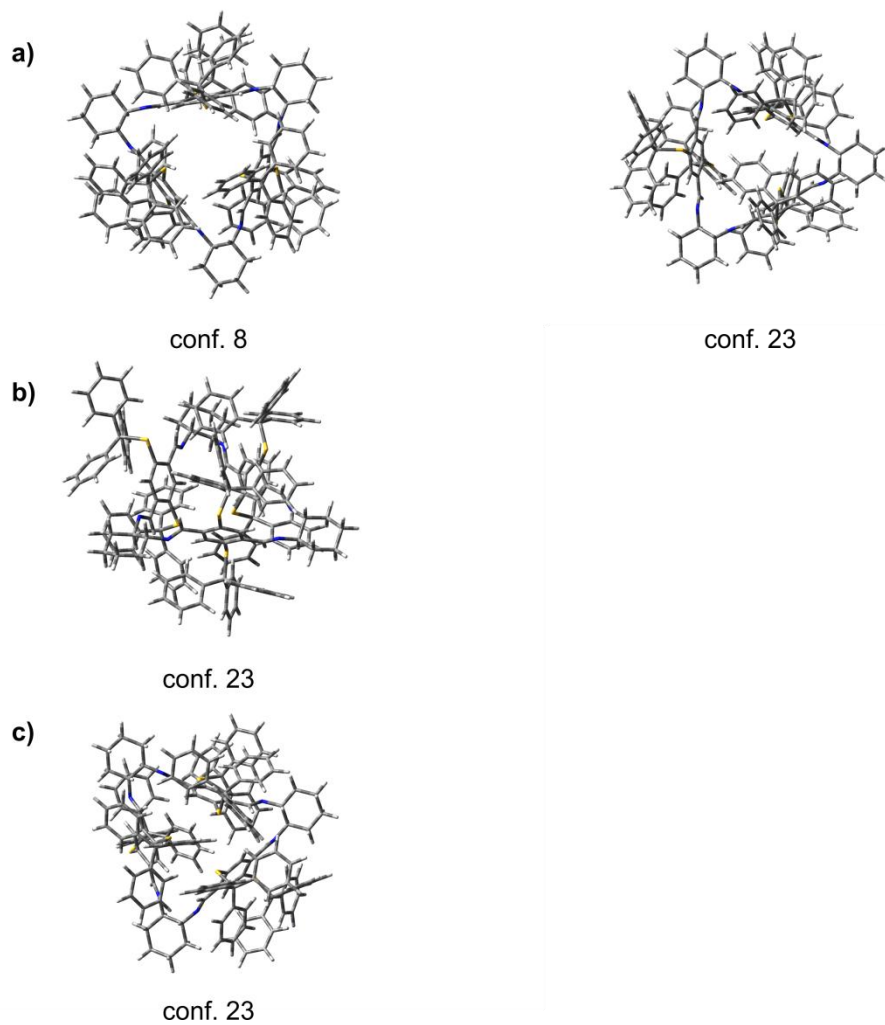

**Figure S56.** Structures of the low-energy conformers of **6f**, calculated at a) the B3LYP/6-31G(d), b) the B3LYP-GD3BJ/6-31G(d) and c) the M06L/6-31G(d) level of theory.

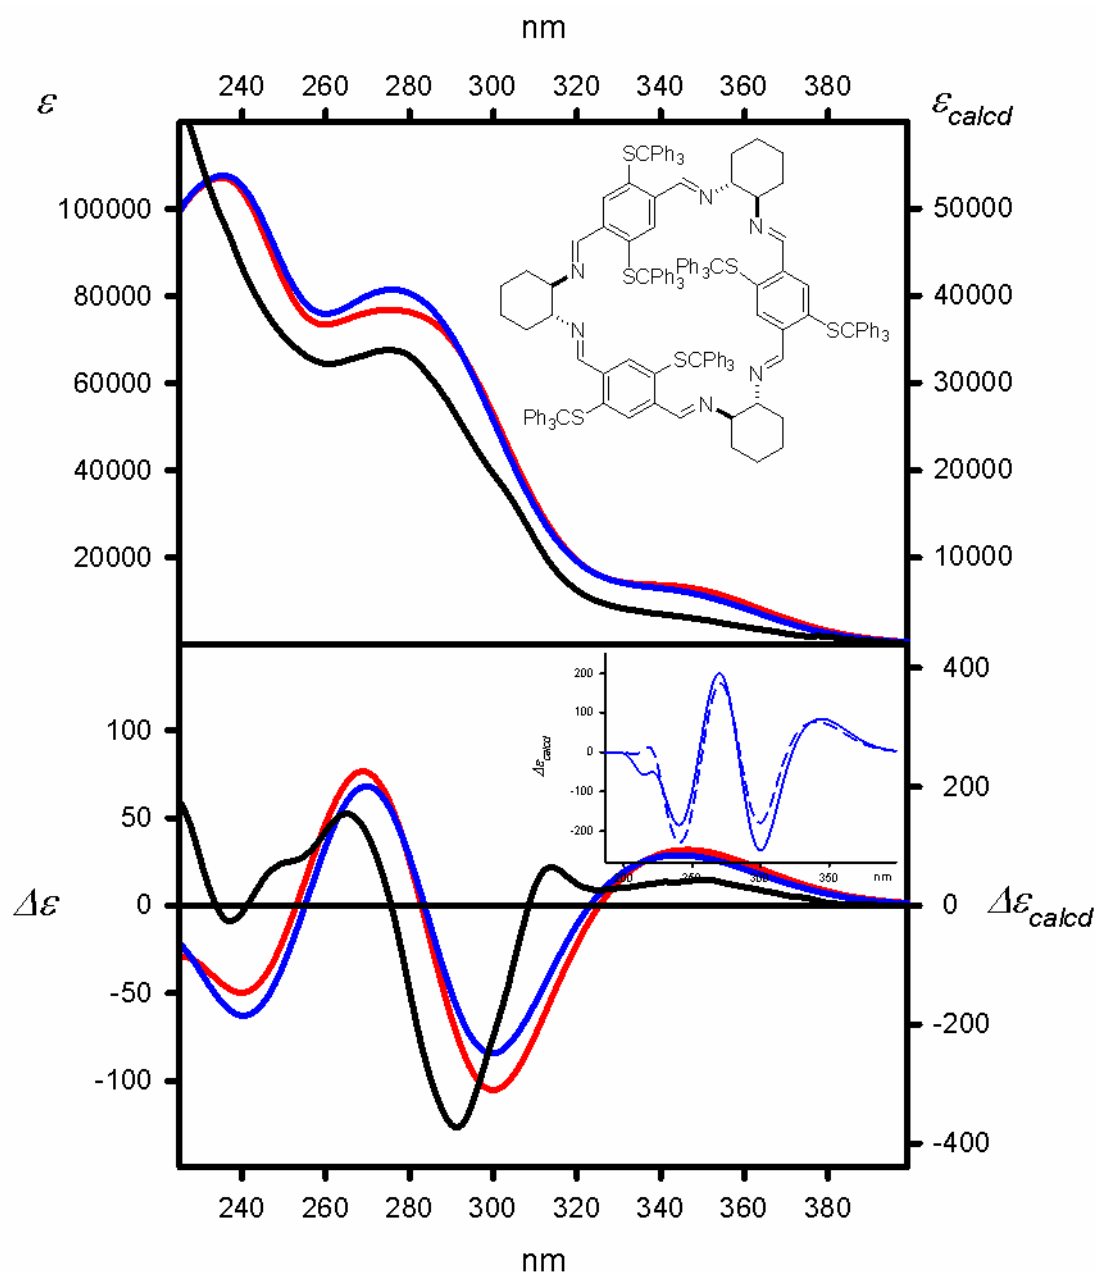

Experimental (dichloromethane, black lines)

Calculated at the  
 TD-CAM-B3LYP/6-31G(d,p) level and:  
 $\Delta E$ -based Boltzmann averaged (red lines)  
 $\Delta\Delta G$ -based Boltzmann averaged (blue lines)  
 Geometry optimized at the  
 B3LYP/6-31G(d) level

**Figure S57.** UV (upper panel) and ECD (lower panel) spectra of **6f** measured in dichloromethane (solid black lines) and calculated at the TD-CAM-B3LYP/6-31G(d,p) level for geometries optimized at the B3LYP/6-31G(d) level. The calculated ECD spectra were Boltzmann-averaged based on  $\Delta E$  (red lines) and  $\Delta\Delta G$  values (blue lines). Wavelengths were corrected to match the experimental UV maxima. The insert shows the comparison between the ECD spectra calculated for the lowest energy conformer of a given compound (dashed blue lines) and the  $\Delta\Delta G$ -based and Boltzmann averaged (solid blue lines).



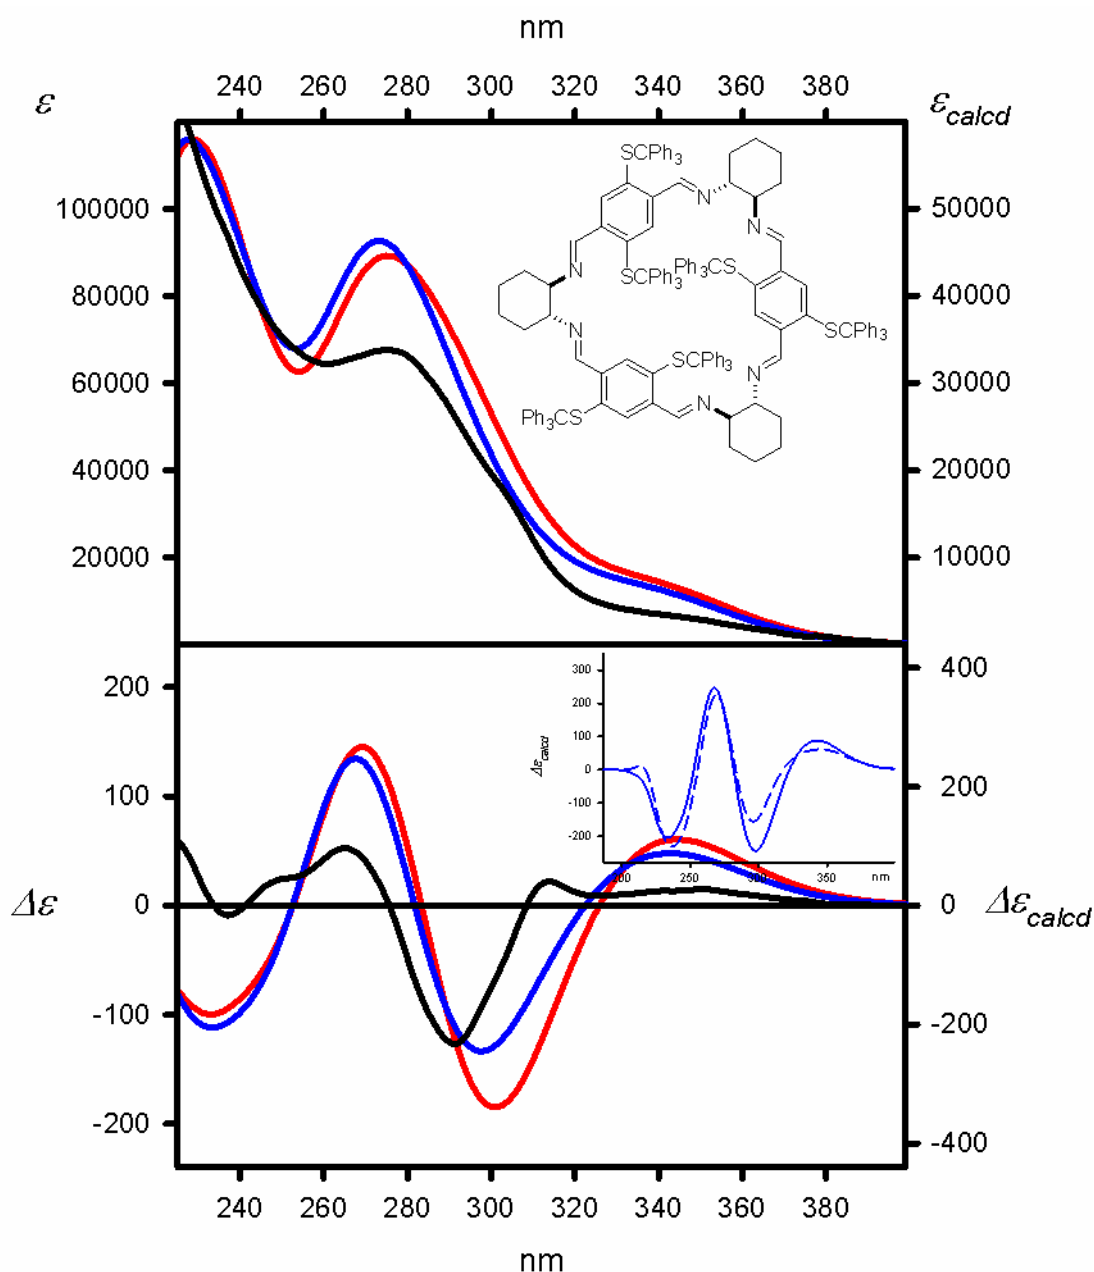

Experimental (dichloromethane, black lines)

Calculated at the

TD-M06-2X/6-31G(d,p) level and:

$\Delta E$ -based Boltzmann averaged (red lines)

$\Delta \Delta G$ -based Boltzmann averaged (blue lines)

Geometry optimized at the

B3LYP/6-31G(d) level

**Figure S58.** UV (upper panel) and ECD (lower panel) spectra of **6f** measured in dichloromethane (solid black lines) and calculated at the TD-M06-2X/6-31G(d,p) level for geometries optimized at the B3LYP/6-31G(d) level. The calculated ECD spectra were Boltzmann-averaged based on  $\Delta E$  (red lines) and  $\Delta \Delta G$  values (blue lines). Wavelengths were corrected to match the experimental UV maxima. The insert shows the comparison between the ECD spectra calculated for the lowest energy conformer of a given compound (dashed blue lines) and the  $\Delta \Delta G$ -based and Boltzmann averaged (solid blue lines).

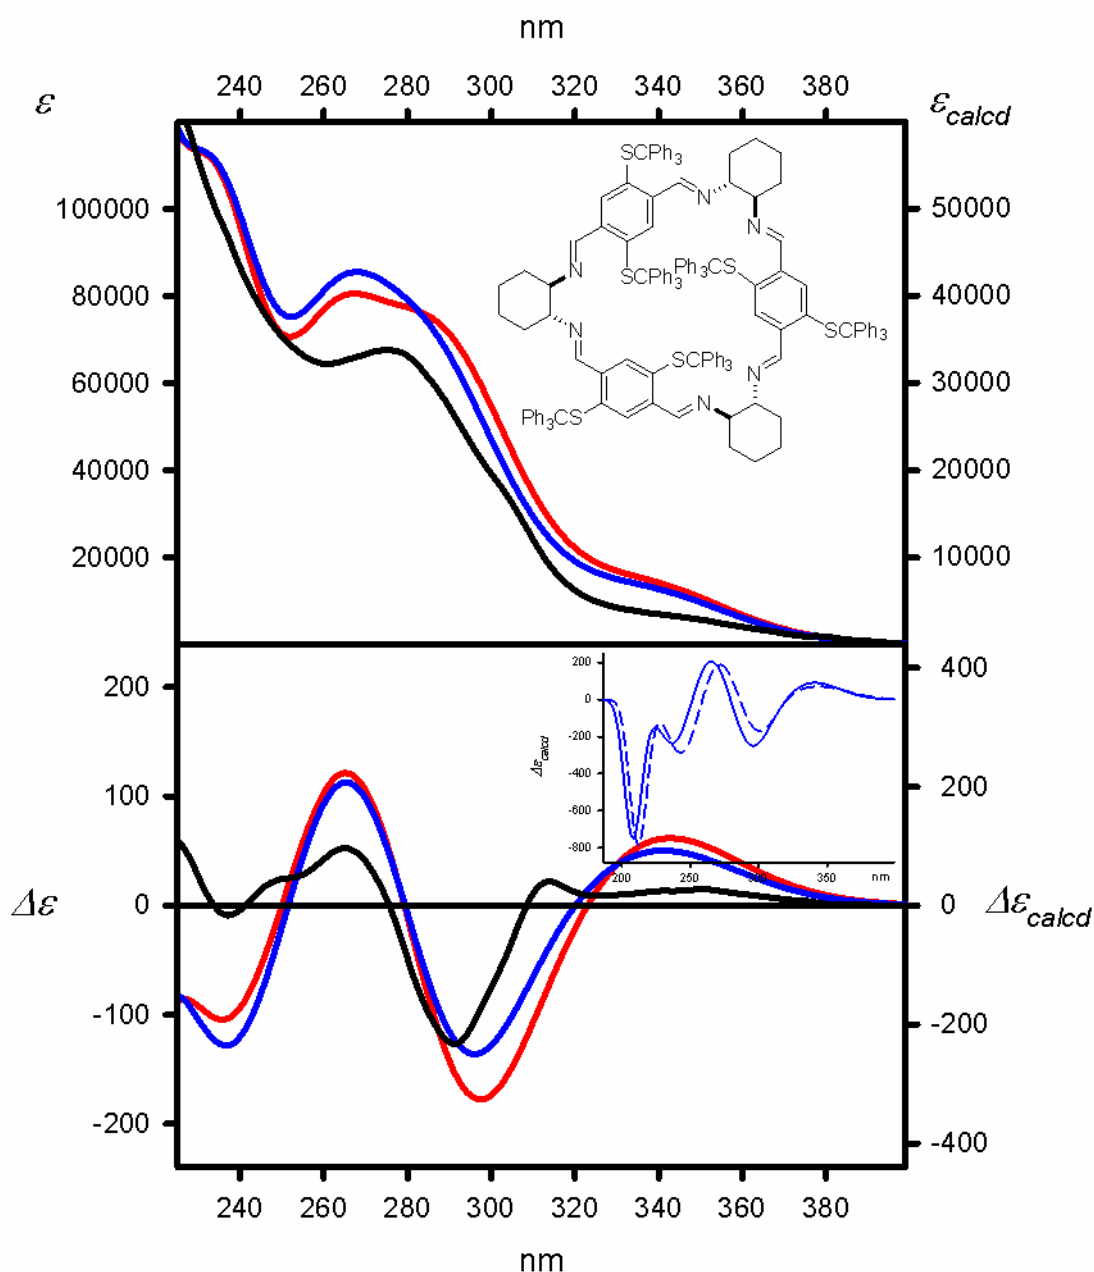

**Figure S59.** UV (upper panel) and ECD (lower panel) spectra of **6f** measured in dichloromethane (solid black lines) and calculated at the TD-wB97XD/6-31G(d,p) level for geometries optimized at the B3LYP/6-31G(d) level. The calculated ECD spectra were Boltzmann-averaged based on  $\Delta E$  (red lines) and  $\Delta G$  values (blue lines). Wavelengths were corrected to match the experimental UV maxima. The insert shows the comparison between the ECD spectra calculated for the lowest energy conformer of a given compound (dashed blue lines) and the  $\Delta G$ -based and Boltzmann averaged (solid blue lines).

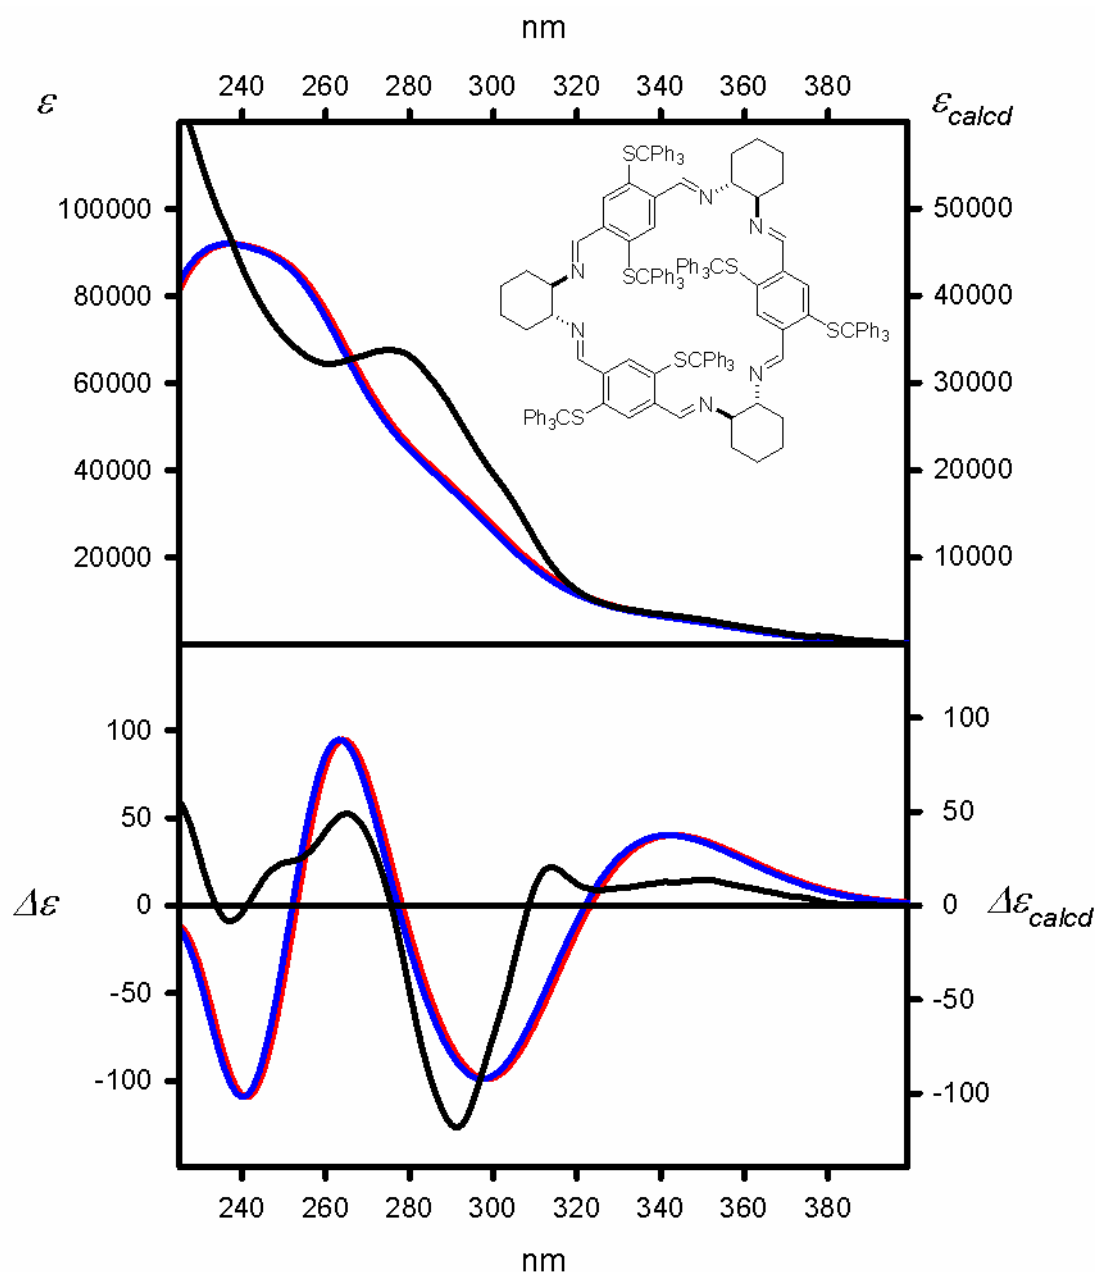

Experimental (dichloromethane, black lines)

Calculated at the  
 TD-CAM-B3LYP/6-31G(d,p) level and:  
 $\Delta E$ -based Boltzmann averaged (red lines)  
 $\Delta G$ -based Boltzmann averaged (blue lines)  
 Geometry optimized at the  
 B3LYP-GD3BJ/6-31G(d) level

**Figure S60.** UV (upper panel) and ECD (lower panel) spectra of **6f** measured in dichloromethane (solid black lines) and calculated at the TD-CAM-B3LYP/6-31G(d,p) level for geometry optimized at the B3LYP-GD3BJ/6-31G(d) level. Wavelengths were corrected to match the experimental UV maxima.

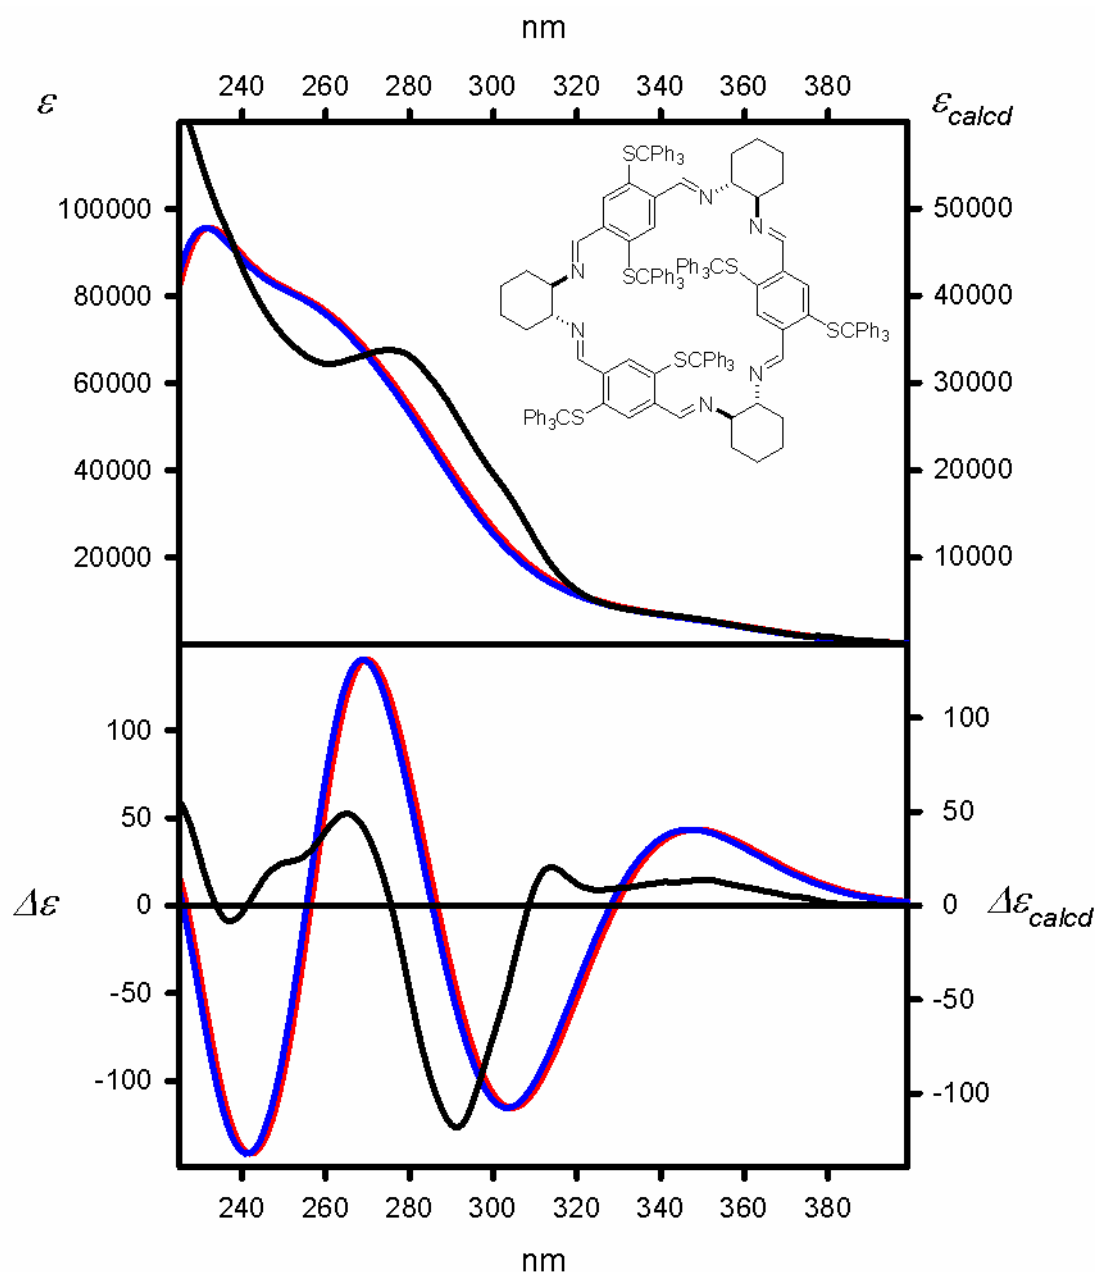

Experimental (dichloromethane, black lines)

Calculated at the  
TD-M06-2X/6-31G(d,p) level and:

$\Delta E$ -based Boltzmann averaged (red lines)

$\Delta G$ -based Boltzmann averaged (blue lines)

Geometry optimized at the  
B3LYP-GD3BJ/6-31G(d) level

**Figure S61.** UV (upper panel) and ECD (lower panel) spectra of **6f** measured in dichloromethane (solid black lines) and calculated at the TD-M06-2X/6-31G(d,p) level for geometry optimized at the B3LYP-GD3BJ/6-31G(d) level. Wavelengths were corrected to match the experimental UV maxima.

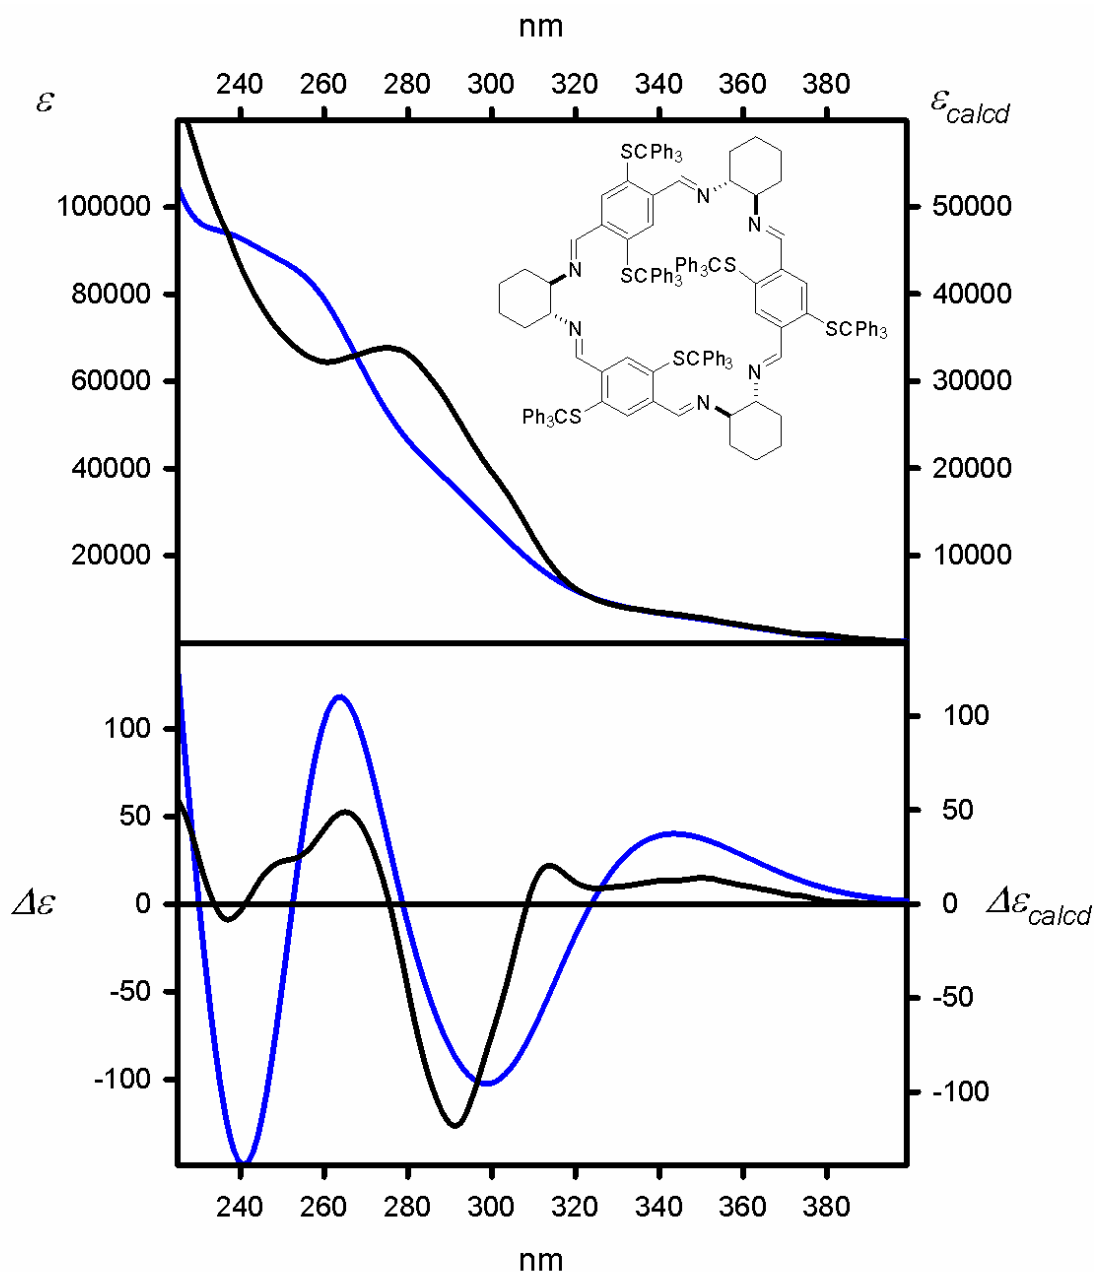

Experimental (dichloromethane, black lines)

Calculated at the  
TD-wB97XD/6-31G(d,p) level and:

$\Delta E$ -based Boltzmann averaged (red lines)

$\Delta G$ -based Boltzmann averaged (blue lines)

Geometry optimized at the  
B3LYP-GD3BJ/6-31G(d) level

**Figure S62.** UV (upper panel) and ECD (lower panel) spectra of **6f** measured in dichloromethane (solid black lines) and calculated at the TD-wB97XD/6-31G(d,p) level for geometry optimized at the B3LYP-GD3BJ/6-31G(d) level. Wavelengths were corrected to match the experimental UV maxima.

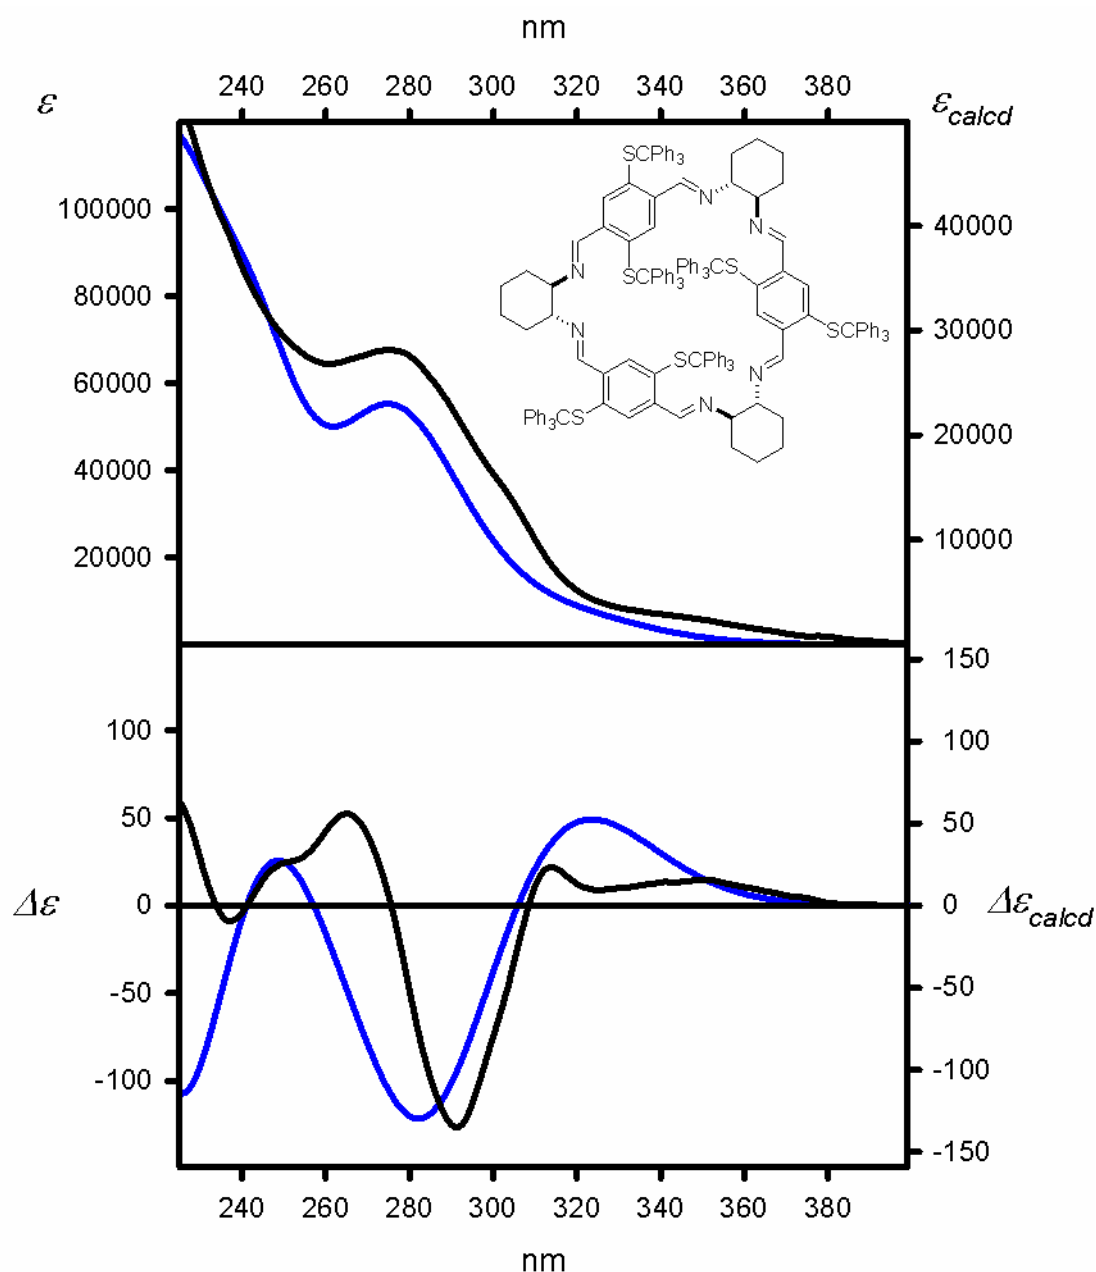

Experimental (dichloromethane, black lines)

Calculated at the  
 TD-CAM-B3LYP/6-31G(d,p) level and:  
 $\Delta E$ -based Boltzmann averaged (red lines)  
 $\Delta G$ -based Boltzmann averaged (blue lines)  
 Geometry optimized at the  
 M06L/6-31G(d) level

**Figure S63.** UV (upper panel) and ECD (lower panel) spectra of **6f** measured in dichloromethane (solid black lines) and calculated at the TD-CAM-B3LYP/6-31G(d,p) level for geometry optimized at the M06L/6-31G(d) level. Wavelengths were corrected to match the experimental UV maxima.

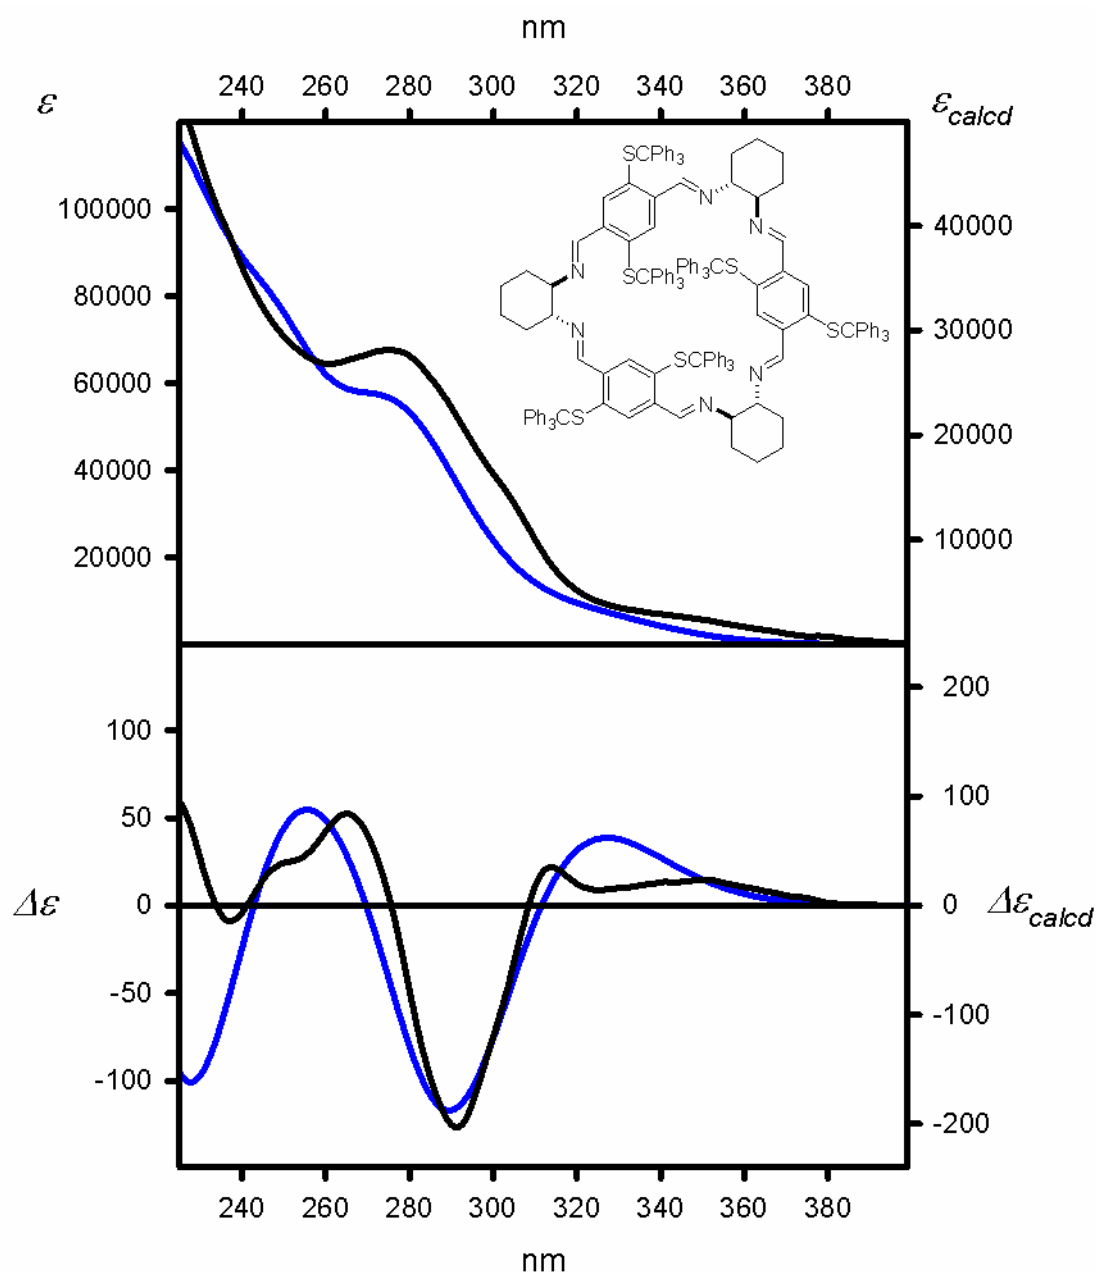

Experimental (dichloromethane, black lines)

Calculated at the  
TD-M06-2X/6-31G(d,p) level and:

$\Delta E$ -based Boltzmann averaged (red lines)

$\Delta G$ -based Boltzmann averaged (blue lines)

Geometry optimized at the  
M06L/6-31G(d) level

**Figure S64.** UV (upper panel) and ECD (lower panel) spectra of **6f** measured in dichloromethane (solid black lines) and calculated at the TD-M06-2X/6-31G(d,p) level for geometry optimized at the M06L/6-31G(d) level. Wavelengths were corrected to match the experimental UV maxima.



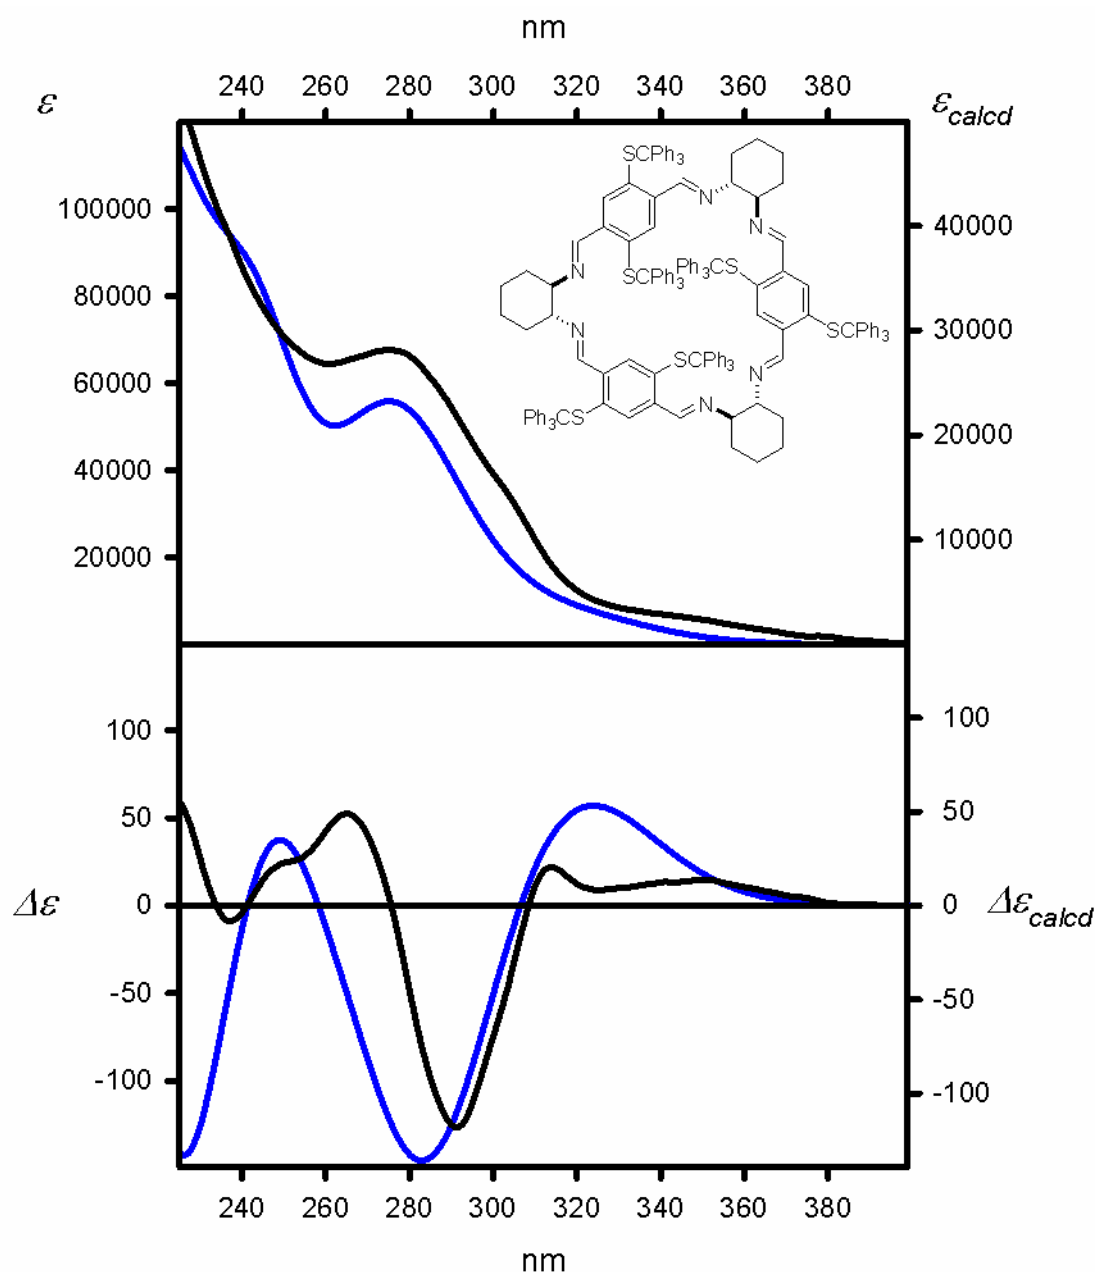

Experimental (dichloromethane, black lines)

Calculated at the  
TD-wB97XD/6-31G(d,p) level and:

$\Delta E$ -based Boltzmann averaged (red lines)

$\Delta G$ -based Boltzmann averaged (blue lines)

Geometry optimized at the

M06L/6-31G(d) level

**Figure S65.** UV (upper panel) and ECD (lower panel) spectra of **6f** measured in dichloromethane (solid black lines) and calculated at the TD-wB97XD/6-31G(d,p) level for geometry optimized at the M06L/6-31G(d) level. Wavelengths were corrected to match the experimental UV maxima.

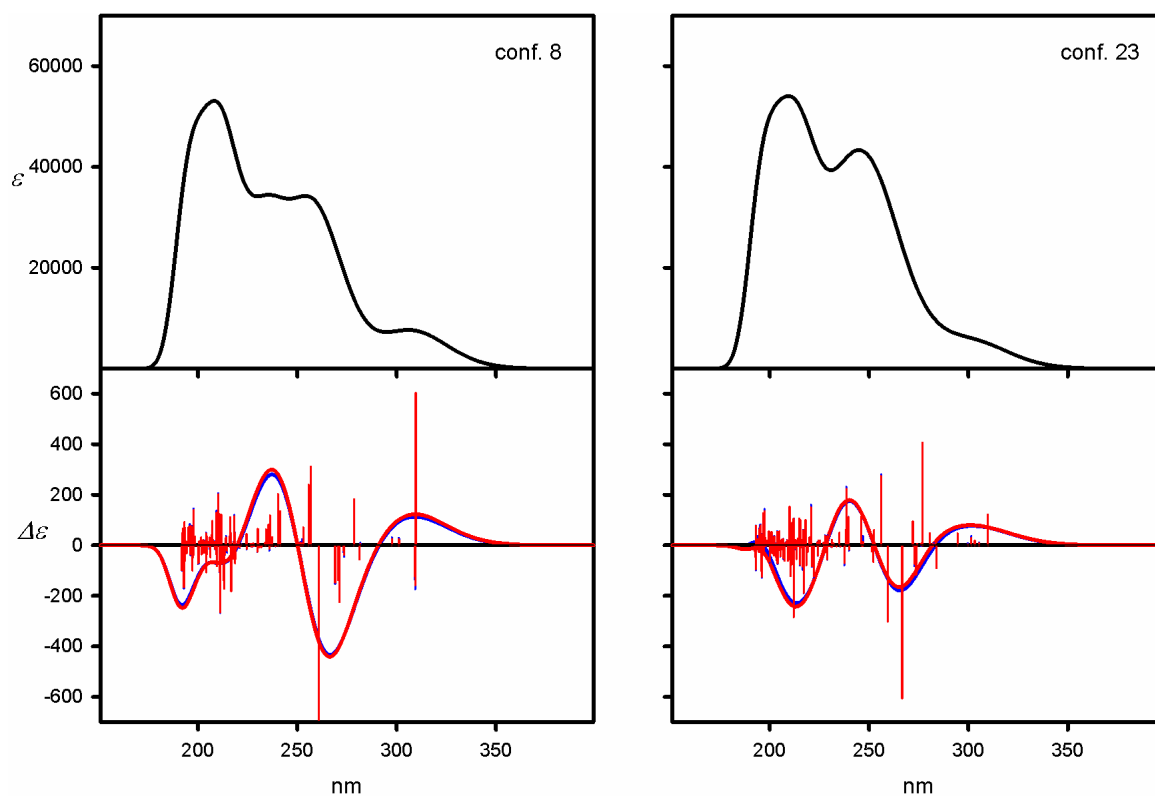

**Figure S66.** UV (upper panels) and ECD (lower panels) spectra calculated at the TD-CAM-B3LYP/6-31G(d,p) level for individual, low-energy conformers of **6f**. Wavelengths were not corrected. Geometries were optimized at the B3LYP/6-31G(d) level.

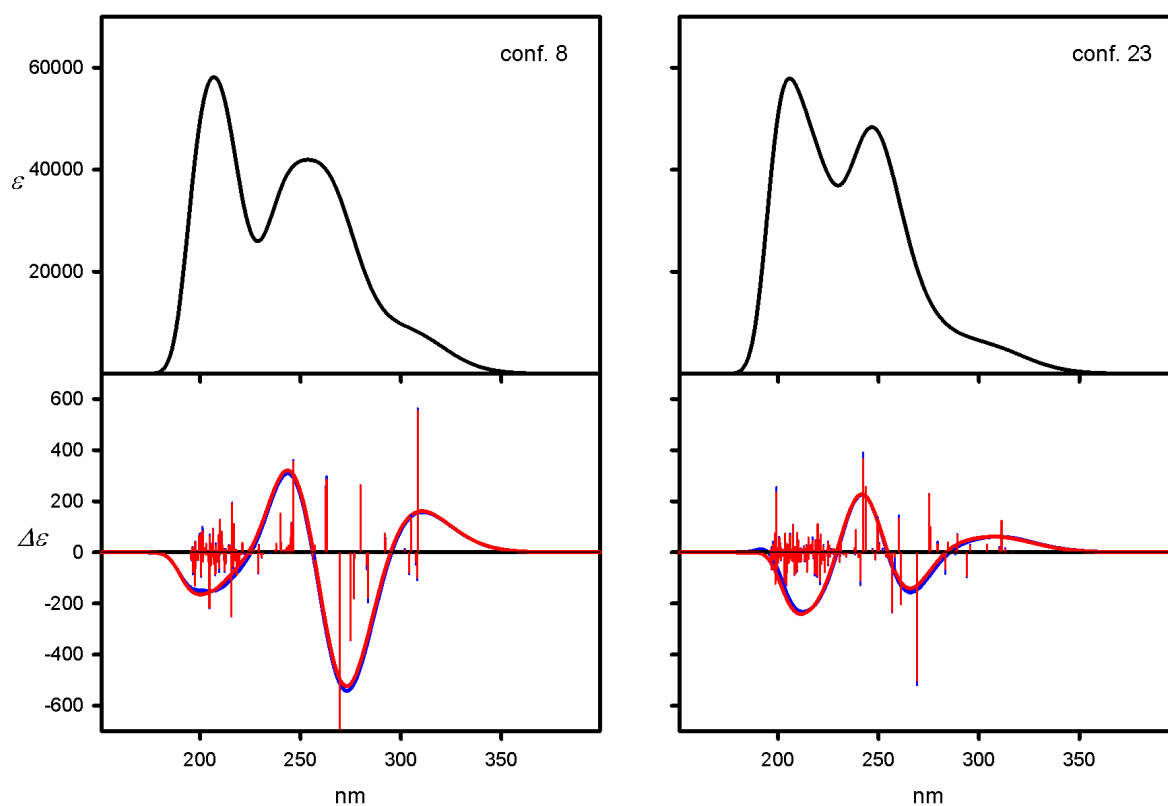

**Figure S67.** UV (upper panels) and ECD (lower panels) spectra calculated at the TD-M06-2X/6-31G(d,p) level for individual, low-energy conformers of **6f**. Wavelengths were not corrected. Geometries were optimized at the B3LYP/6-31G(d) level.

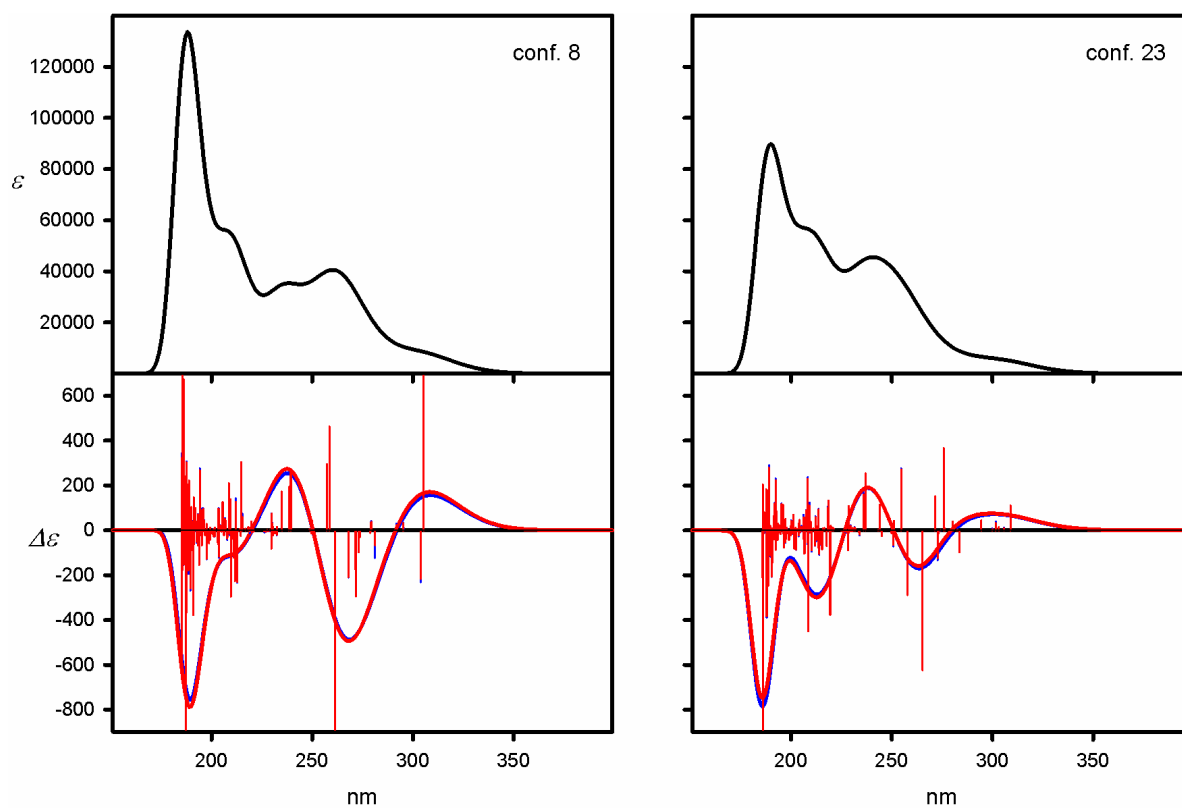

**Figure S68.** UV (upper panels) and ECD (lower panels) spectra calculated at the TD-wB97XD/6-31G(d,p) level for individual, low-energy conformers of **6f**. Wavelengths were not corrected. Geometries were optimized at the B3LYP/6-31G(d) level.

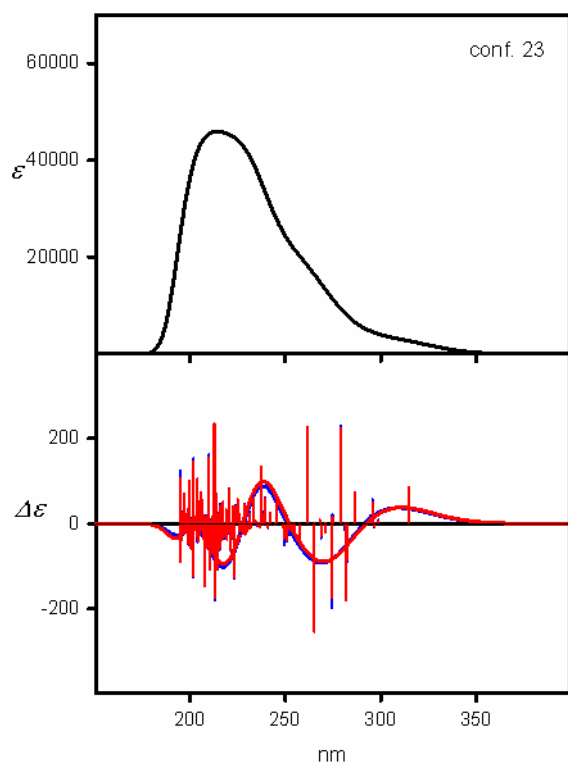

**Figure S69.** UV (upper panels) and ECD (lower panels) spectra calculated at the TD-CAM-B3LYP/6-31G(d,p) level for individual, low-energy conformers of **6f**. Wavelengths were not corrected. Geometries were optimized at the B3LYP-GD3BJ/6-31G(d) level.

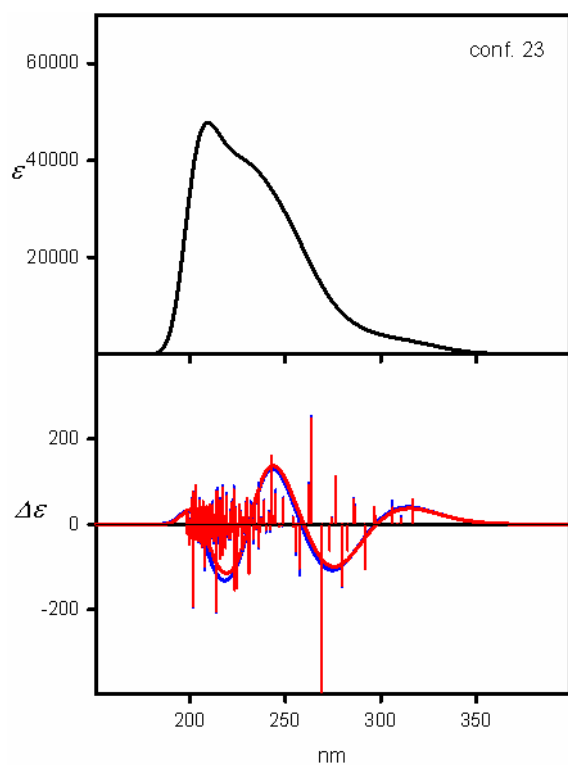

**Figure S70.** UV (upper panels) and ECD (lower panels) spectra calculated at the TD-M06-2X/6-31G(d,p) level for individual, low-energy conformers of **6f**. Wavelengths were not corrected. Geometries were optimized at the B3LYP-GD3BJ/6-31G(d) level.

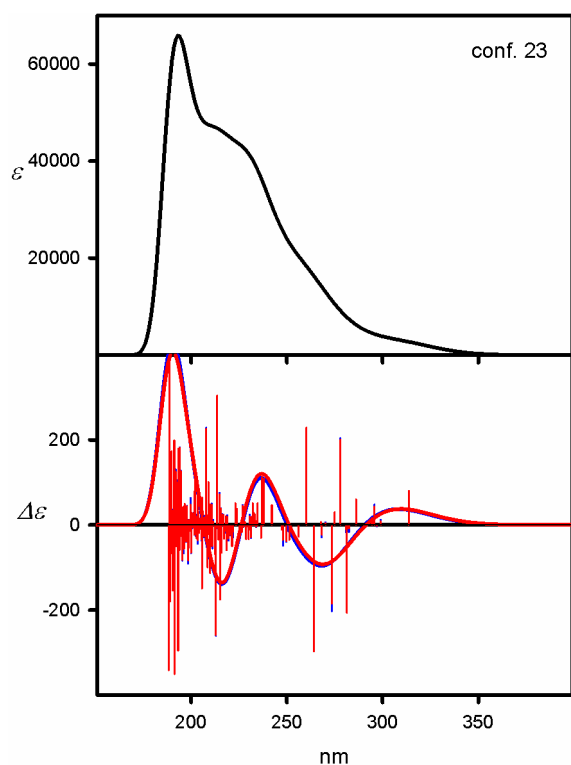

**Figure S71.** UV (upper panels) and ECD (lower panels) spectra calculated at the TD-wB97XD/6-31G(d,p) level for individual, low-energy conformers of **6f**. Wavelengths were not corrected. Geometries were optimized at the B3LYP-GD3BJ/6-31G(d) level.

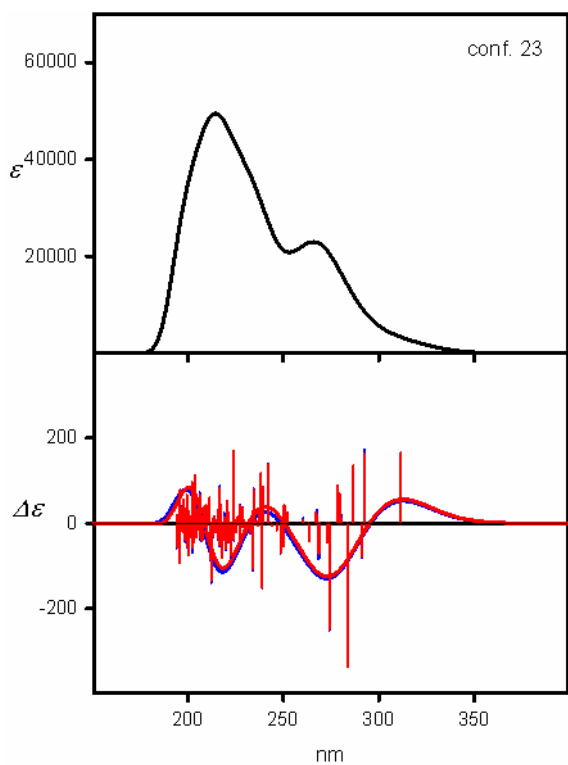

**Figure S72.** UV (upper panels) and ECD (lower panels) spectra calculated at the TD-CAM-B3LYP/6-31G(d,p) level for individual, low-energy conformers of **6f**. Wavelengths were not corrected. Geometries were optimized at the M06L/6-31G(d) level.

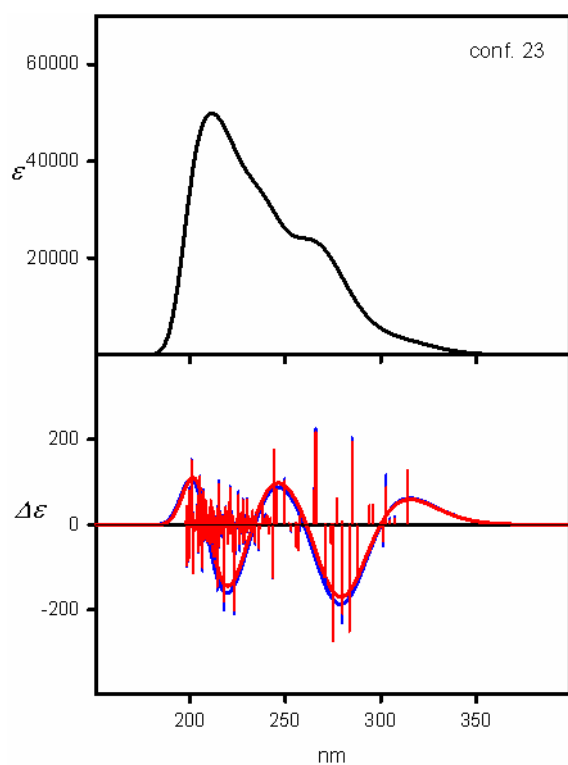

**Figure S73.** UV (upper panels) and ECD (lower panels) spectra calculated at the TD-M06-2X/6-31G(d,p) level for individual, low-energy conformers of **6f**. Wavelengths were not corrected. Geometries were optimized at the M06L/6-31G(d) level.

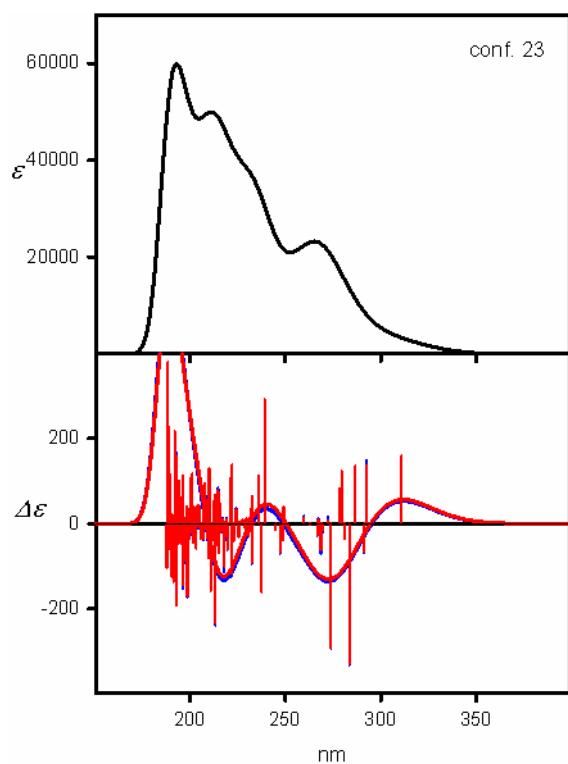

**Figure S74.** UV (upper panels) and ECD (lower panels) spectra calculated at the TD-wB97XD/6-31G(d,p) level for individual, low-energy conformers of **6f**. Wavelengths were not corrected. Geometries were optimized at the M06L/6-31G(d) level.



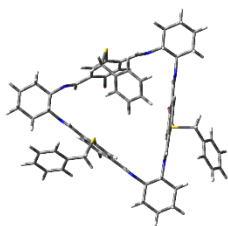

conf. sym-1

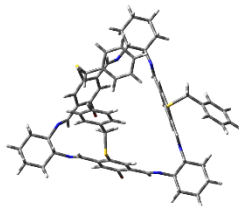

conf. sym-29

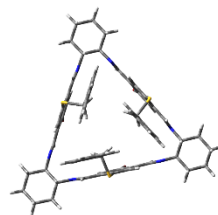

conf. sym-41

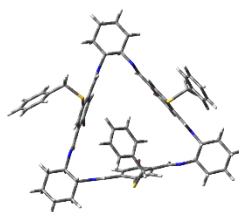

conf. sym-67

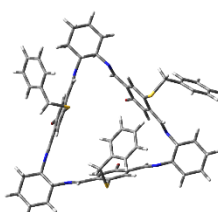

conf. sym-68

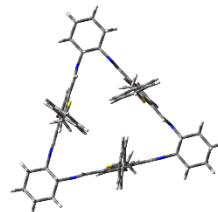

conf. sym-74

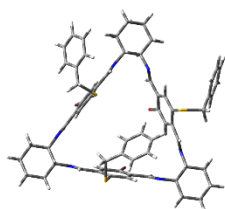

conf. sym-77

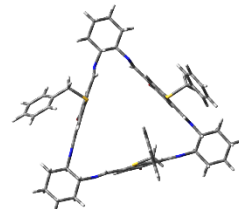

conf. sym-87

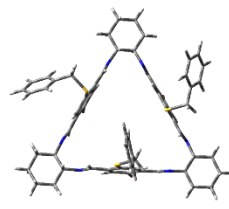

conf. sym-98

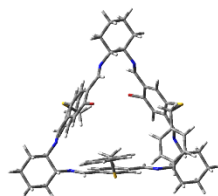

conf. 2

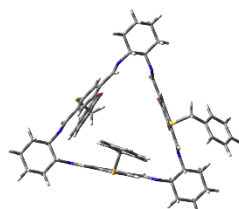

conf. 6

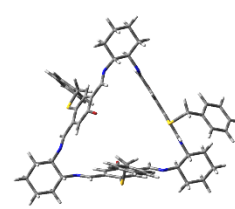

conf. 8

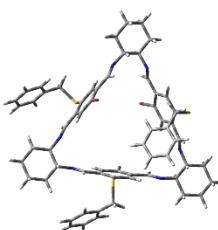

conf. 9

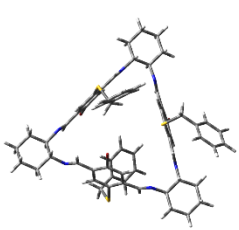

conf. 10

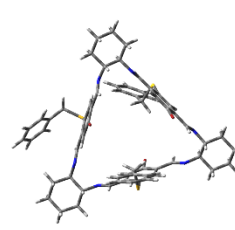

conf. 11

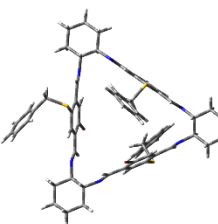

conf. 12

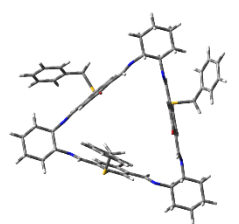

conf. 13

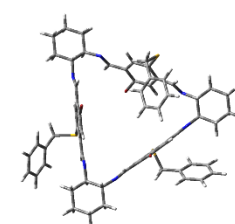

conf. 14

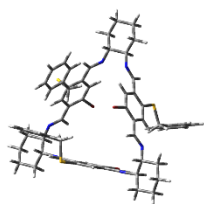

conf. 15

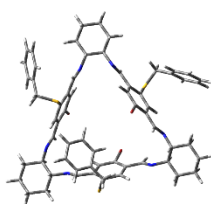

conf. 16

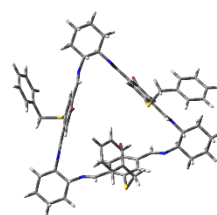

conf. 17

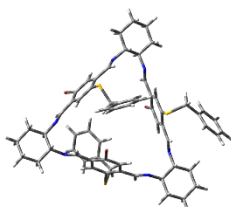

conf. 20

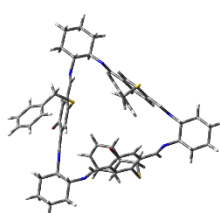

conf. 22

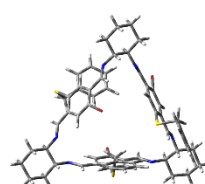

conf. 24

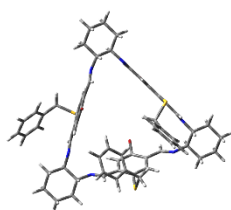

conf. 25

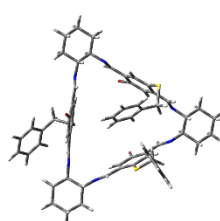

conf. 26

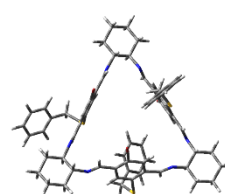

conf. 27

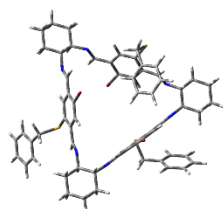

conf. 28

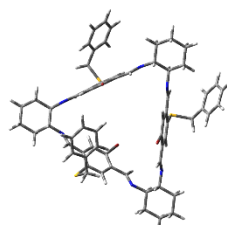

conf. 30

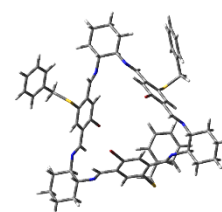

conf. 31

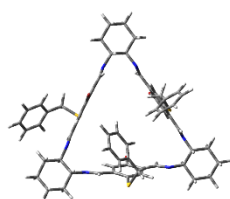

conf. 34

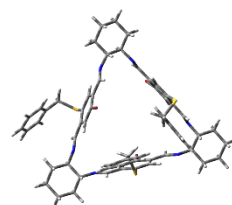

conf. 36

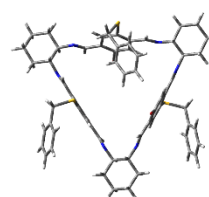

conf. 37

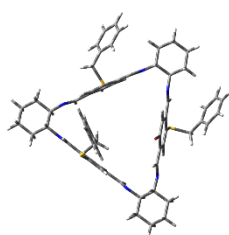

conf. 40

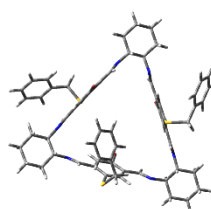

conf. 41

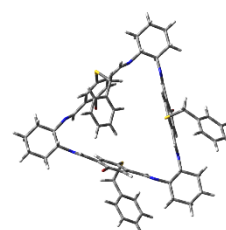

conf. 44

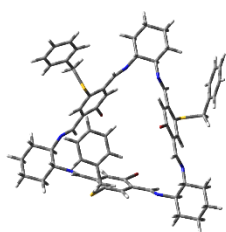

conf. 45

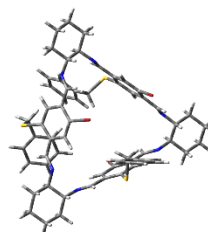

conf. 46

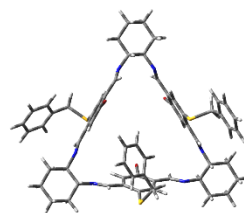

conf. 48

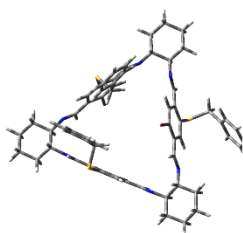

conf. 49

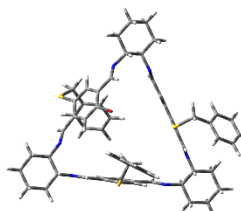

conf. 52

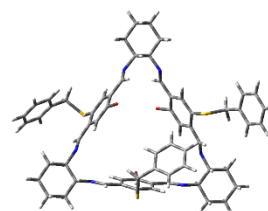

conf. 53

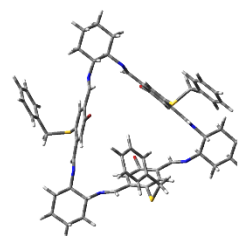

conf. 58

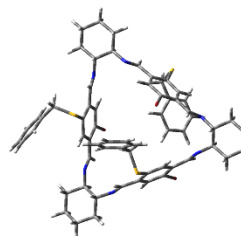

conf. 59

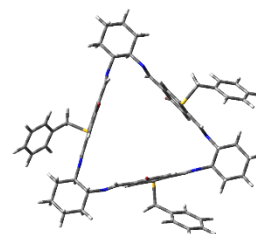

conf. 61

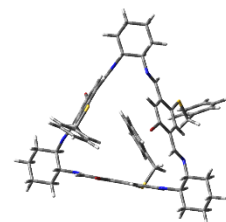

conf. 62

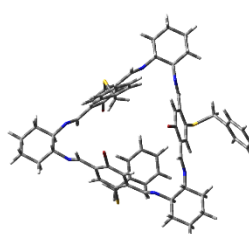

conf. 63

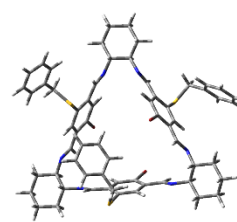

conf. 64

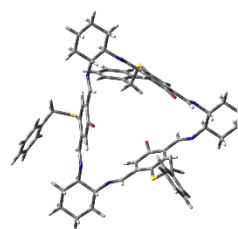

conf. 65

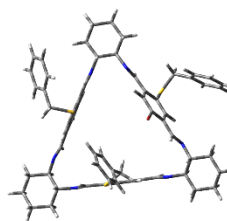

conf. 66

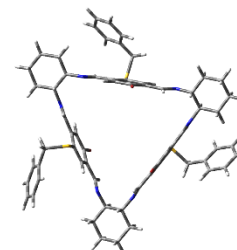

conf. 72

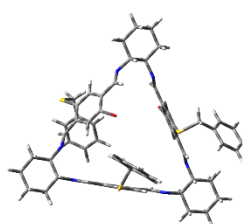

conf. 73

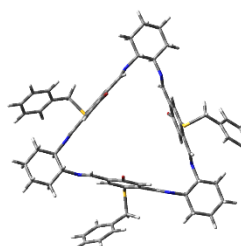

conf. 75

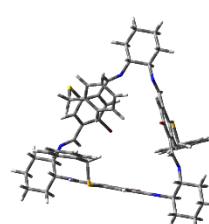

conf. 76

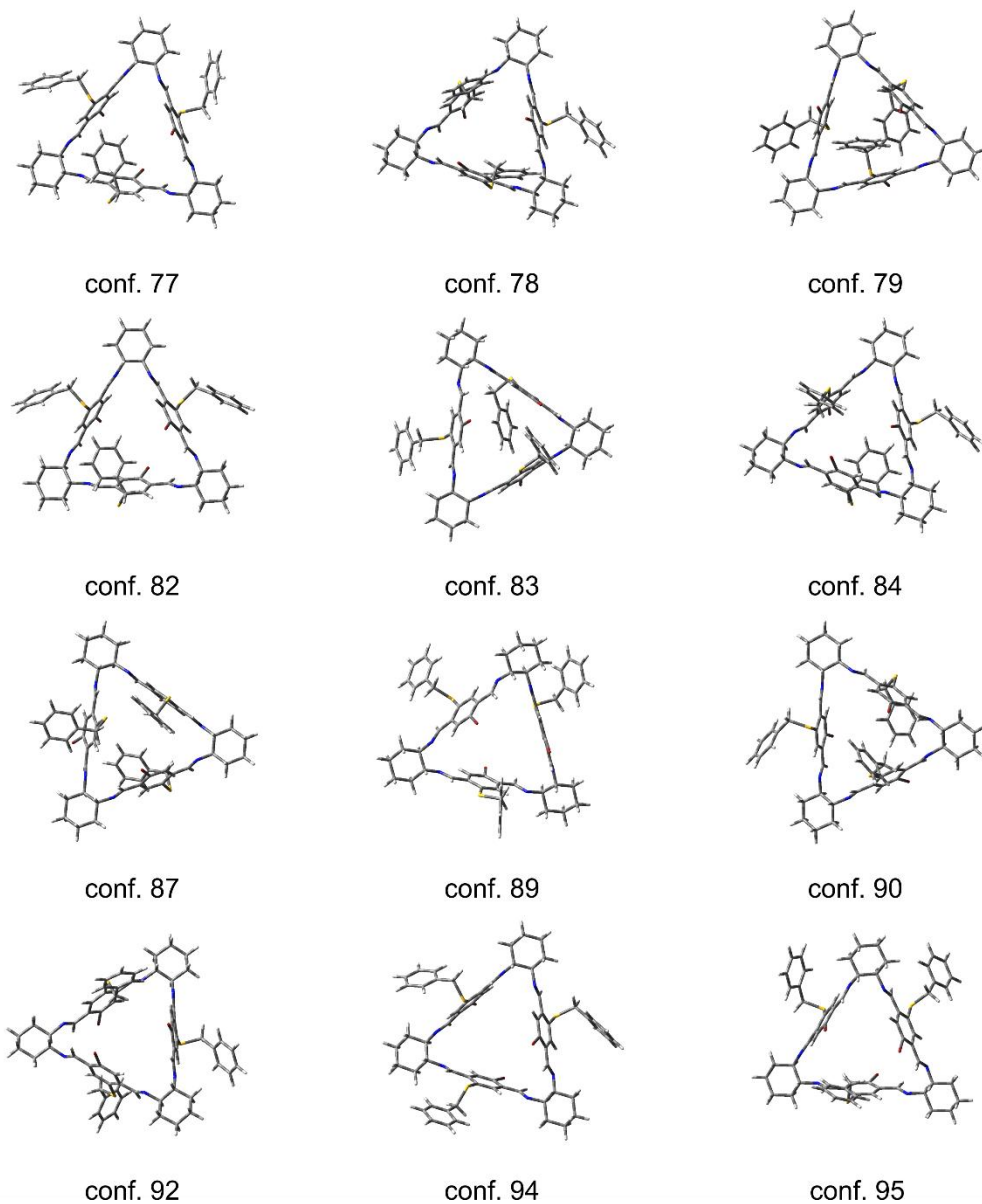

**Figure S75.** Structures of the low-energy conformers of **6g**, calculated at the B3LYP/6-311G(d,p) level. Prefix “sym” denotes a symmetrical conformer.

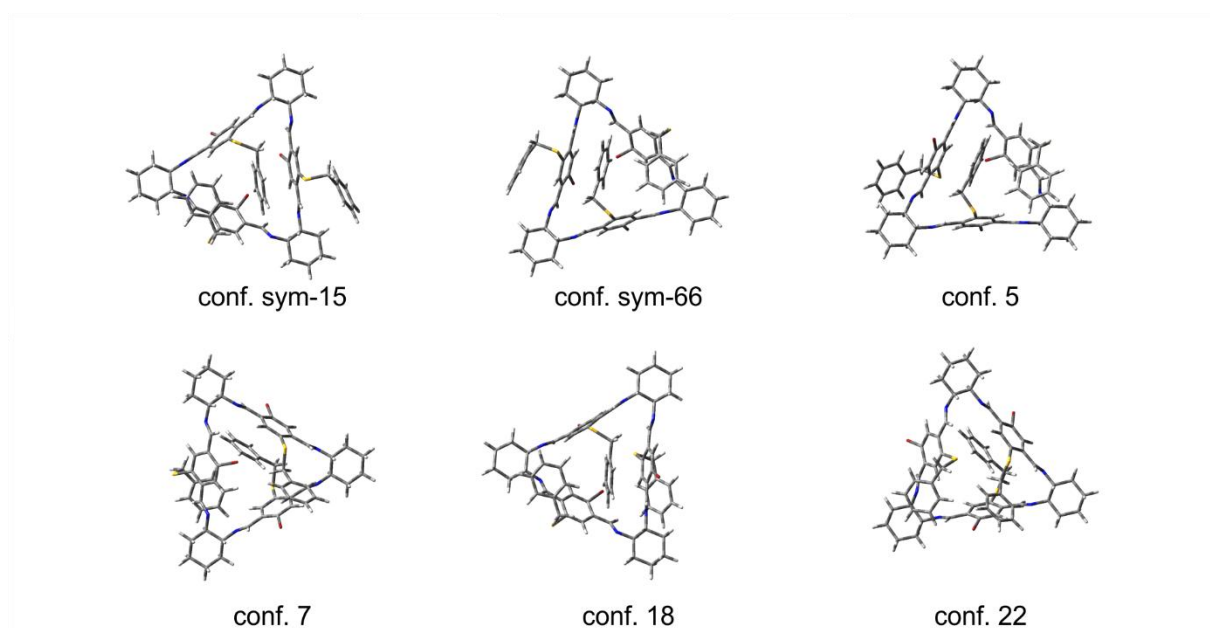

**Figure S76.** Structures of the low-energy conformers of **6g**, calculated at the B3LYP-GD3BJ/6-311G(d,p) level. Prefix “sym” denotes a symmetrical conformer.

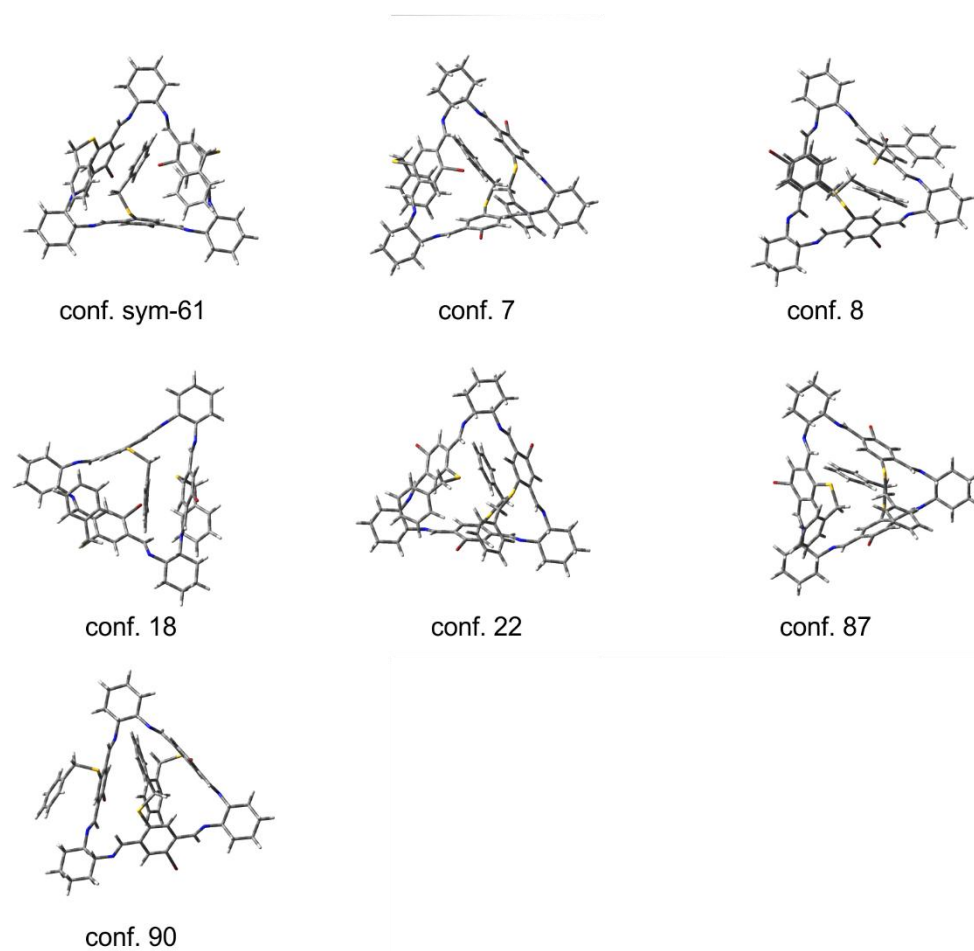

**Figure S77.** Structures of the low-energy conformers of **6g**, calculated at the M06L/6-311G(d,p) level. Prefix “sym” denotes a symmetrical conformer.

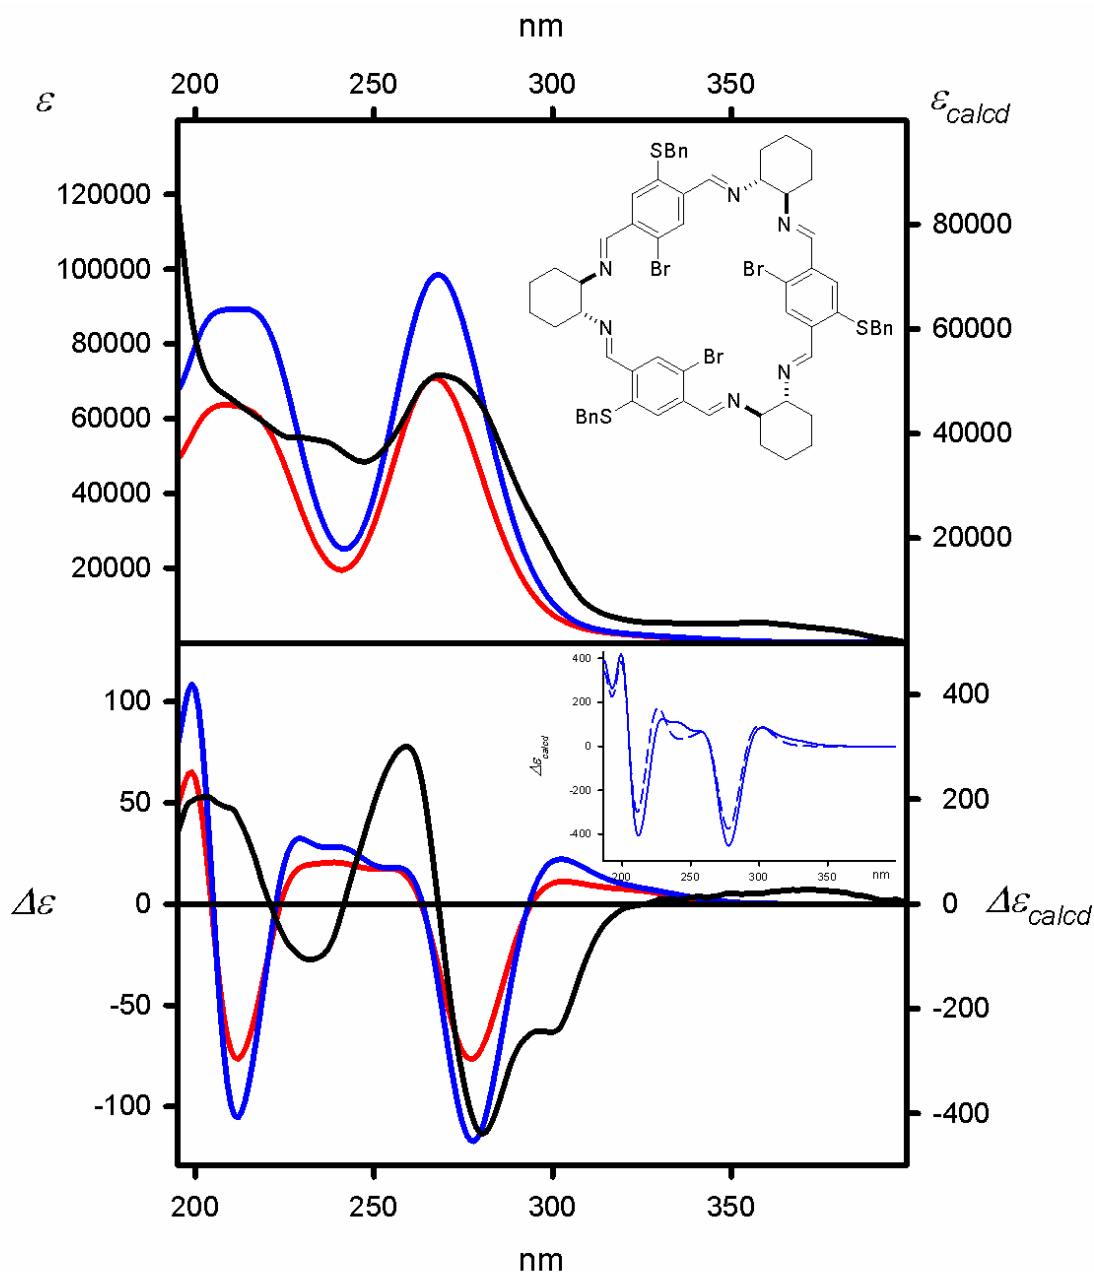

Experimental (cyclohexane, black lines)

Calculated at the  
 TD-CAM-B3LYP/6-311G(d,p) level and:  
 $\Delta E$ -based Boltzmann averaged (red lines)  
 $\Delta\Delta G$ -based Boltzmann averaged (blue lines)  
 Geometry optimized at the  
 B3LYP/6-311G(d,p) level

**Figure S78.** UV (upper panel) and ECD (lower panel) spectra of **6g** measured in cyclohexane (solid black lines) and calculated at the TD-CAM-B3LYP/6-311G(d,p) level for geometries optimized at the B3LYP/6-311G(d,p) level. The calculated ECD spectra were Boltzmann-averaged based on  $\Delta E$  (red lines) and  $\Delta\Delta G$  values (blue lines). Wavelengths were corrected to match the experimental UV maxima. The insert shows the comparison between the ECD spectra calculated for the lowest energy conformer of a given compound (dashed blue lines) and the  $\Delta\Delta G$ -based and Boltzmann averaged (solid blue lines).

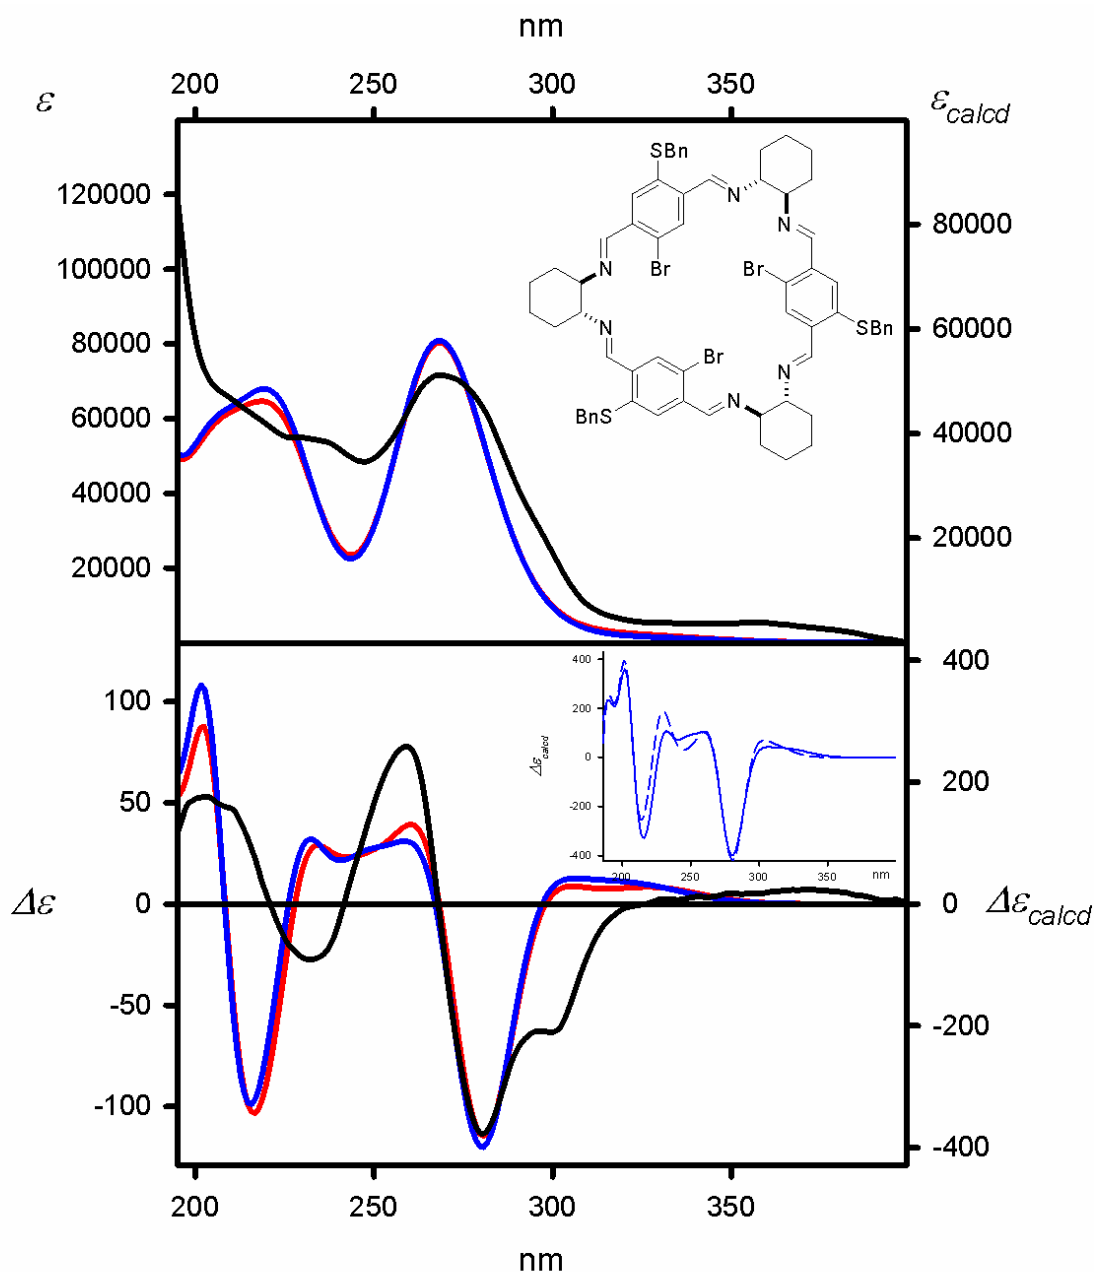

Experimental (cyclohexane, black lines)

Calculated at the  
TD-M06-2X/6-311G(d,p) level and:

$\Delta E$ -based Boltzmann averaged (red lines)

$\Delta\Delta G$ -based Boltzmann averaged (blue lines)

Geometry optimized at the  
B3LYP/6-311G(d,p) level

**Figure S79.** UV (upper panel) and ECD (lower panel) spectra of **6g** measured in cyclohexane (solid black lines) and calculated at the TD-M06-2X/6-311G(d,p) level for geometries optimized at the B3LYP/6-311G(d,p) level. The calculated ECD spectra were Boltzmann-averaged based on  $\Delta E$  (red lines) and  $\Delta\Delta G$  values (blue lines). Wavelengths were corrected to match the experimental UV maxima. The insert shows the comparison between the ECD spectra calculated for the lowest energy conformer of a given compound (dashed blue lines) and the  $\Delta\Delta G$ -based and Boltzmann averaged (solid blue lines).



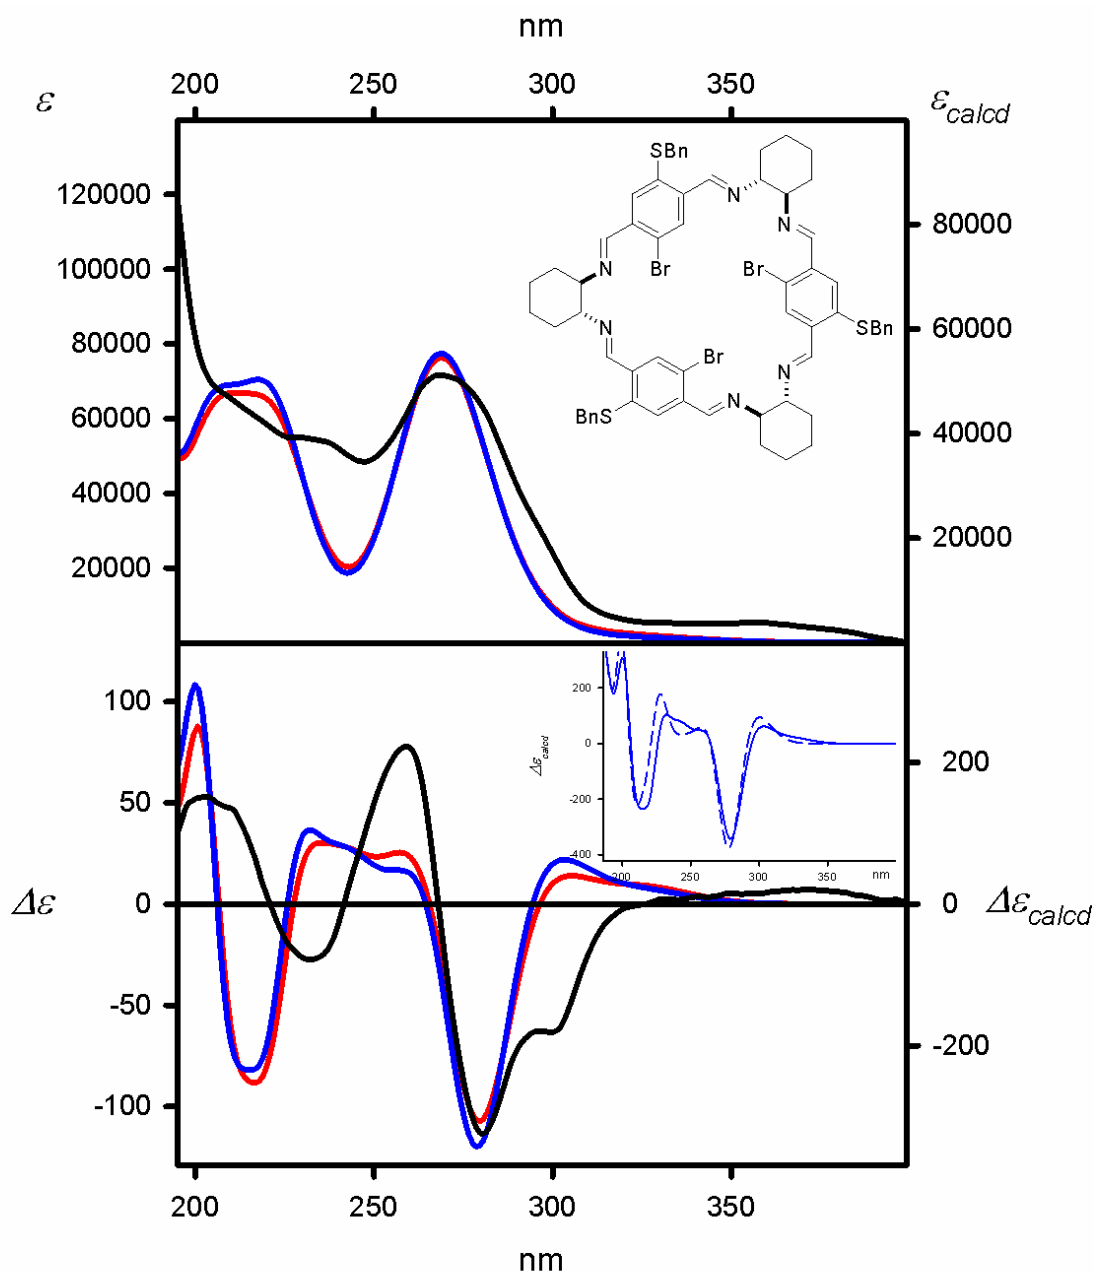

Experimental (cyclohexane, black lines)

Calculated at the  
TD-wB97XD/6-311G(d,p) level and:

$\Delta E$ -based Boltzmann averaged (red lines)

$\Delta\Delta G$ -based Boltzmann averaged (blue lines)

Geometry optimized at the  
B3LYP/6-311G(d,p) level

**Figure S80.** UV (upper panel) and ECD (lower panel) spectra of **6g** measured in cyclohexane (solid black lines) and calculated at the TD-wB97XD/6-311G(d,p) level for geometries optimized at the B3LYP/6-311G(d,p) level. The calculated ECD spectra were Boltzmann-averaged based on  $\Delta E$  (red lines) and  $\Delta\Delta G$  values (blue lines). Wavelengths were corrected to match the experimental UV maxima. The insert shows the comparison between the ECD spectra calculated for the lowest energy conformer of a given compound (dashed blue lines) and the  $\Delta\Delta G$ -based and Boltzmann averaged (solid blue lines).

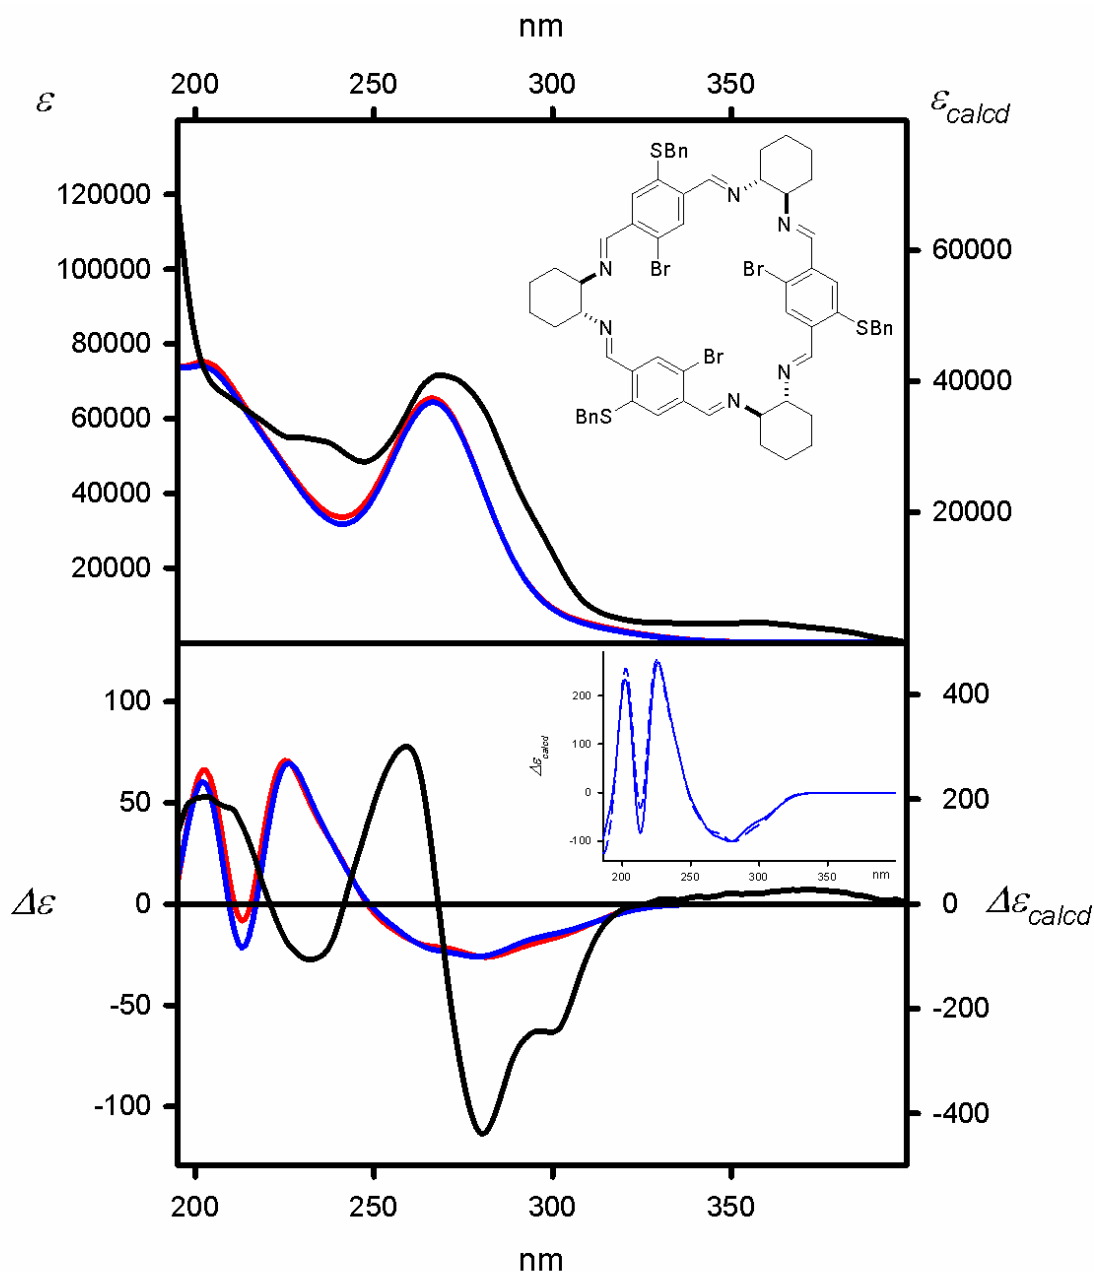

Experimental (cyclohexane, black lines)

Calculated at the  
 TD-CAM-B3LYP/6-311G(d,p) level and:  
 $\Delta E$ -based Boltzmann averaged (red lines)  
 $\Delta\Delta G$ -based Boltzmann averaged (blue lines)  
 Geometry optimized at the  
 B3LYP-GD3BJ/6-311G(d,p) level

**Figure S81.** UV (upper panel) and ECD (lower panel) spectra of **6g** measured in cyclohexane (solid black lines) and calculated at the TD-CAM-B3LYP/6-311G(d,p) level for geometries optimized at the B3LYP-GD3BJ/6-311G(d,p) level. The calculated ECD spectra were Boltzmann-averaged based on  $\Delta E$  (red lines) and  $\Delta\Delta G$  values (blue lines). Wavelengths were corrected to match the experimental UV maxima. The insert shows the comparison between the ECD spectra calculated for the lowest energy conformer of a given compound (dashed blue lines) and the  $\Delta\Delta G$ -based and Boltzmann averaged (solid blue lines).

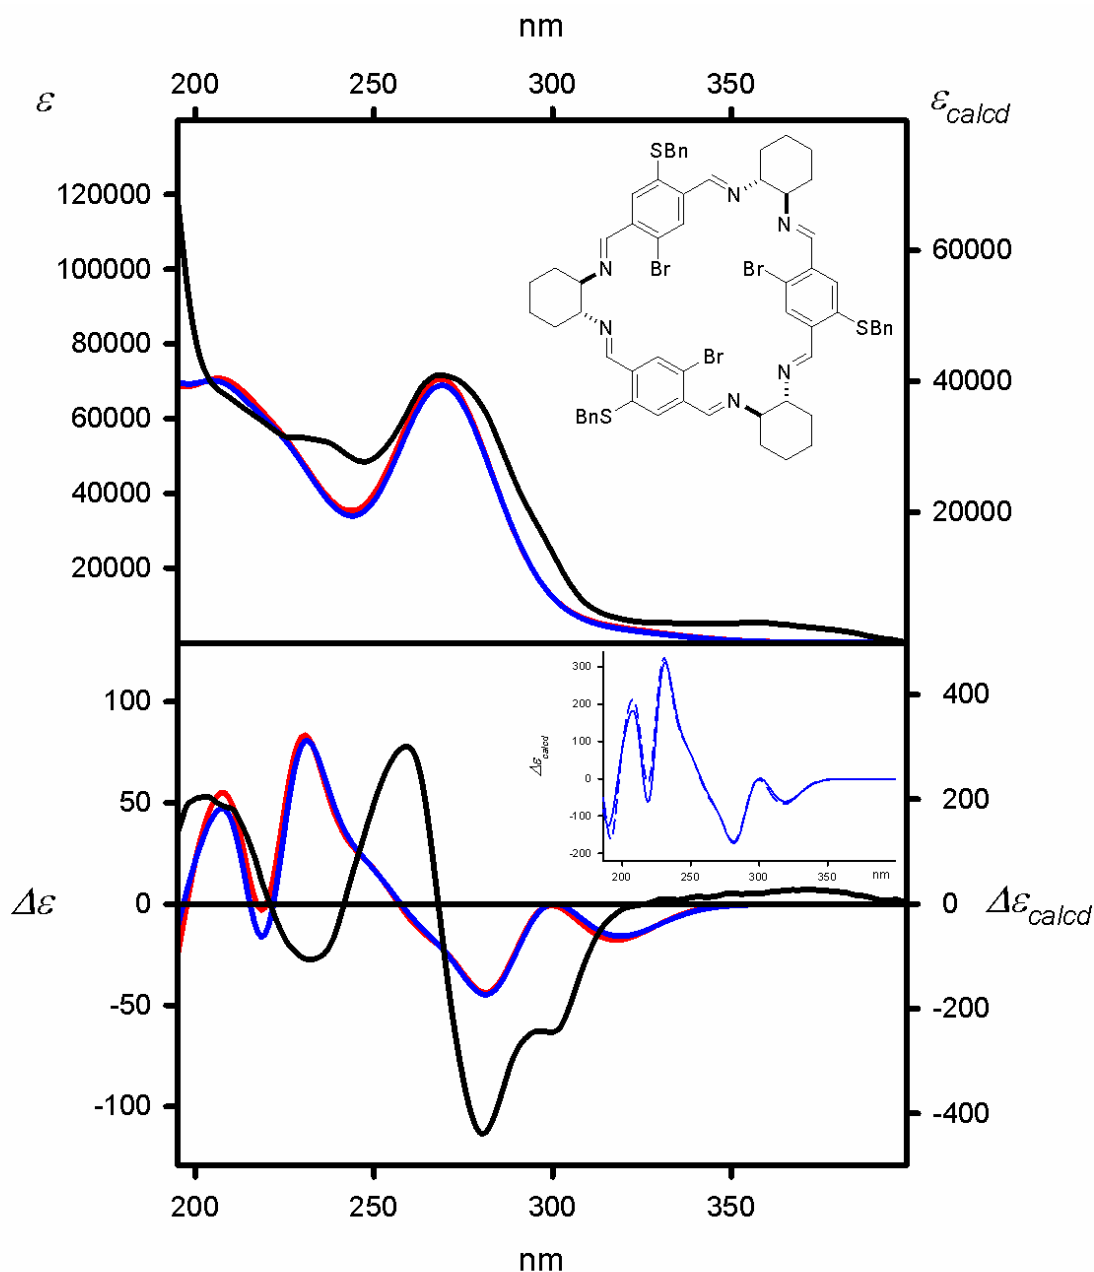

Experimental (cyclohexane, black lines)

Calculated at the  
TD-M06-2X/6-311G(d,p) level and:

$\Delta E$ -based Boltzmann averaged (red lines)

$\Delta\Delta G$ -based Boltzmann averaged (blue lines)

Geometry optimized at the  
B3LYP-GD3BJ/6-311G(d,p) level

**Figure S82.** UV (upper panel) and ECD (lower panel) spectra of **6g** measured in cyclohexane (solid black lines) and calculated at the TD-M06-2X/6-311G(d,p) level for geometries optimized at the B3LYP-GD3BJ/6-311G(d,p) level. The calculated ECD spectra were Boltzmann-averaged based on  $\Delta E$  (red lines) and  $\Delta\Delta G$  values (blue lines). Wavelengths were corrected to match the experimental UV maxima. The insert shows the comparison between the ECD spectra calculated for the lowest energy conformer of a given compound (dashed blue lines) and the  $\Delta\Delta G$ -based and Boltzmann averaged (solid blue lines).

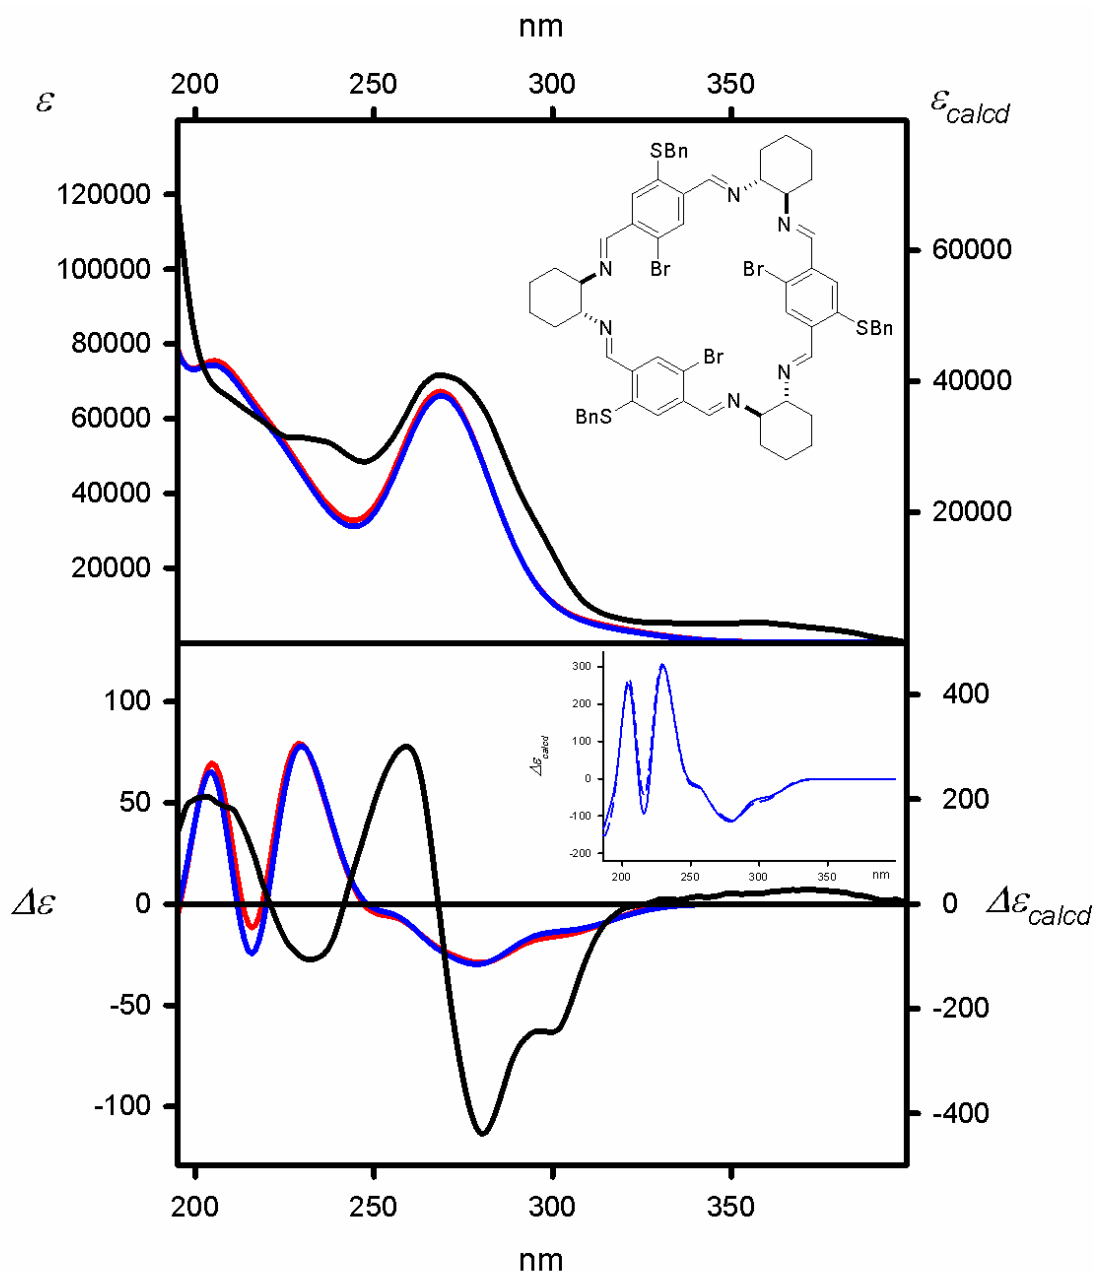

Experimental (cyclohexane, black lines)

Calculated at the  
TD-wB97XD/6-311G(d,p) level and:

$\Delta E$ -based Boltzmann averaged (red lines)

$\Delta\Delta G$ -based Boltzmann averaged (blue lines)

Geometry optimized at the  
B3LYP-GD3BJ/6-311G(d,p) level

**Figure S83.** UV (upper panel) and ECD (lower panel) spectra of **6g** measured in cyclohexane (solid black lines) and calculated at the TD-wB97XD/6-311G(d,p) level for geometries optimized at the B3LYP-GD3BJ/6-311G(d,p) level. The calculated ECD spectra were Boltzmann-averaged based on  $\Delta E$  (red lines) and  $\Delta\Delta G$  values (blue lines). Wavelengths were corrected to match the experimental UV maxima. The insert shows the comparison between the ECD spectra calculated for the lowest energy conformer of a given compound (dashed blue lines) and the  $\Delta\Delta G$ -based and Boltzmann averaged (solid blue lines).

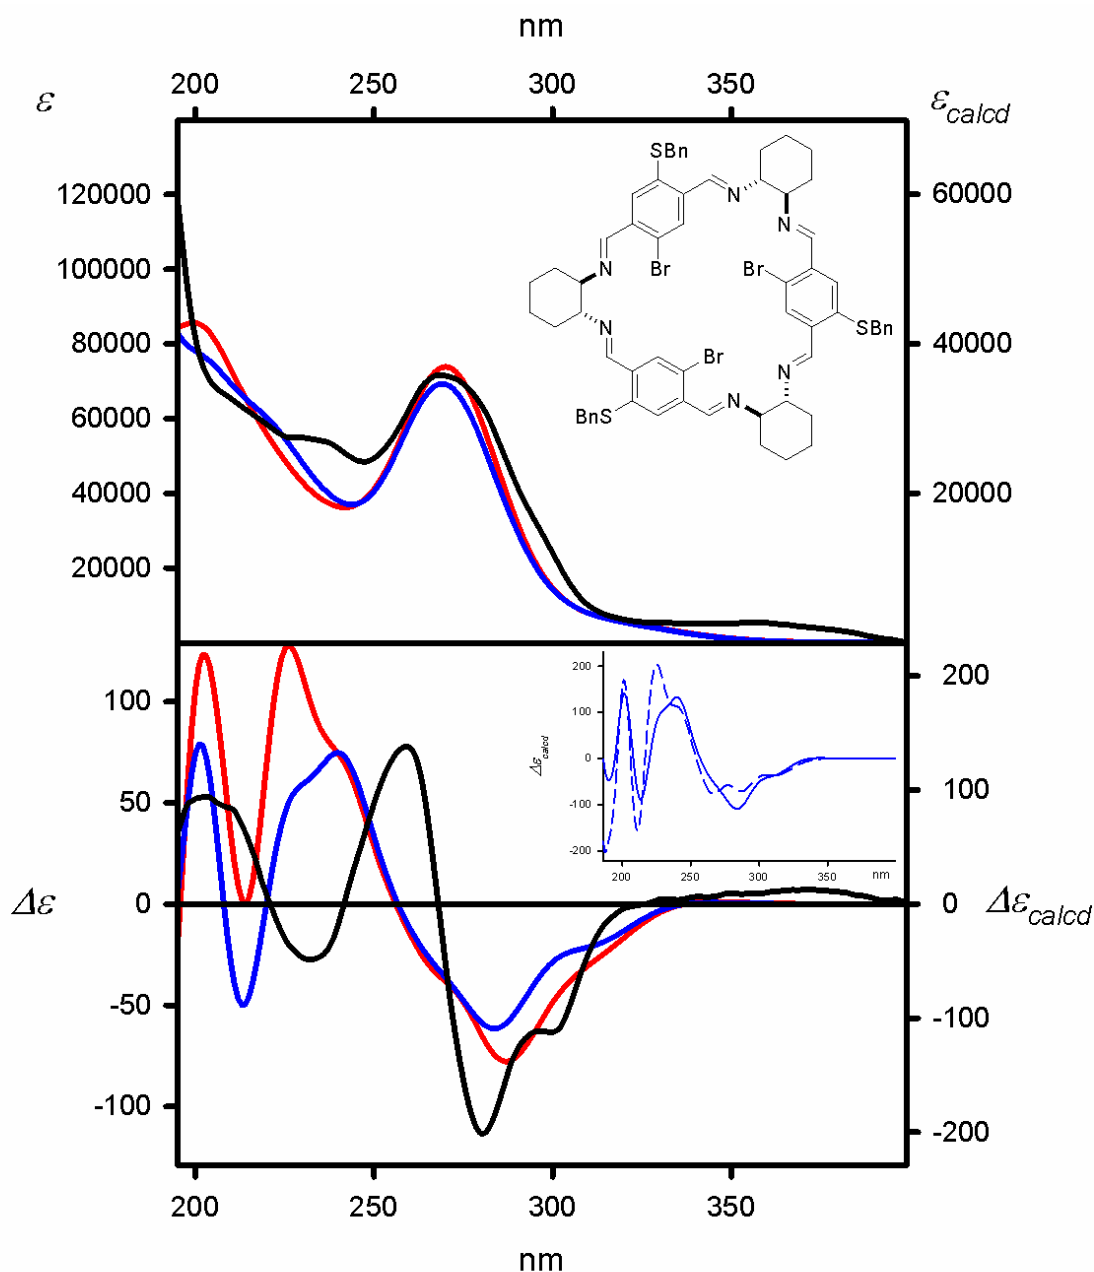

Experimental (cyclohexane, black lines)

Calculated at the  
 TD-CAM-B3LYP/6-311G(d,p) level and:  
 $\Delta E$ -based Boltzmann averaged (red lines)  
 $\Delta\Delta G$ -based Boltzmann averaged (blue lines)  
 Geometry optimized at the  
 M06L/6-311G(d,p) level

**Figure S84.** UV (upper panel) and ECD (lower panel) spectra of **6g** measured in cyclohexane (solid black lines) and calculated at the TD-CAM-B3LYP/6-311G(d,p) level for geometries optimized at the M06L/6-311G(d,p) level. The calculated ECD spectra were Boltzmann-averaged based on  $\Delta E$  (red lines) and  $\Delta\Delta G$  values (blue lines). Wavelengths were corrected to match the experimental UV maxima. The insert shows the comparison between the ECD spectra calculated for the lowest energy conformer of a given compound (dashed blue lines) and the  $\Delta\Delta G$ -based and Boltzmann averaged (solid blue lines).

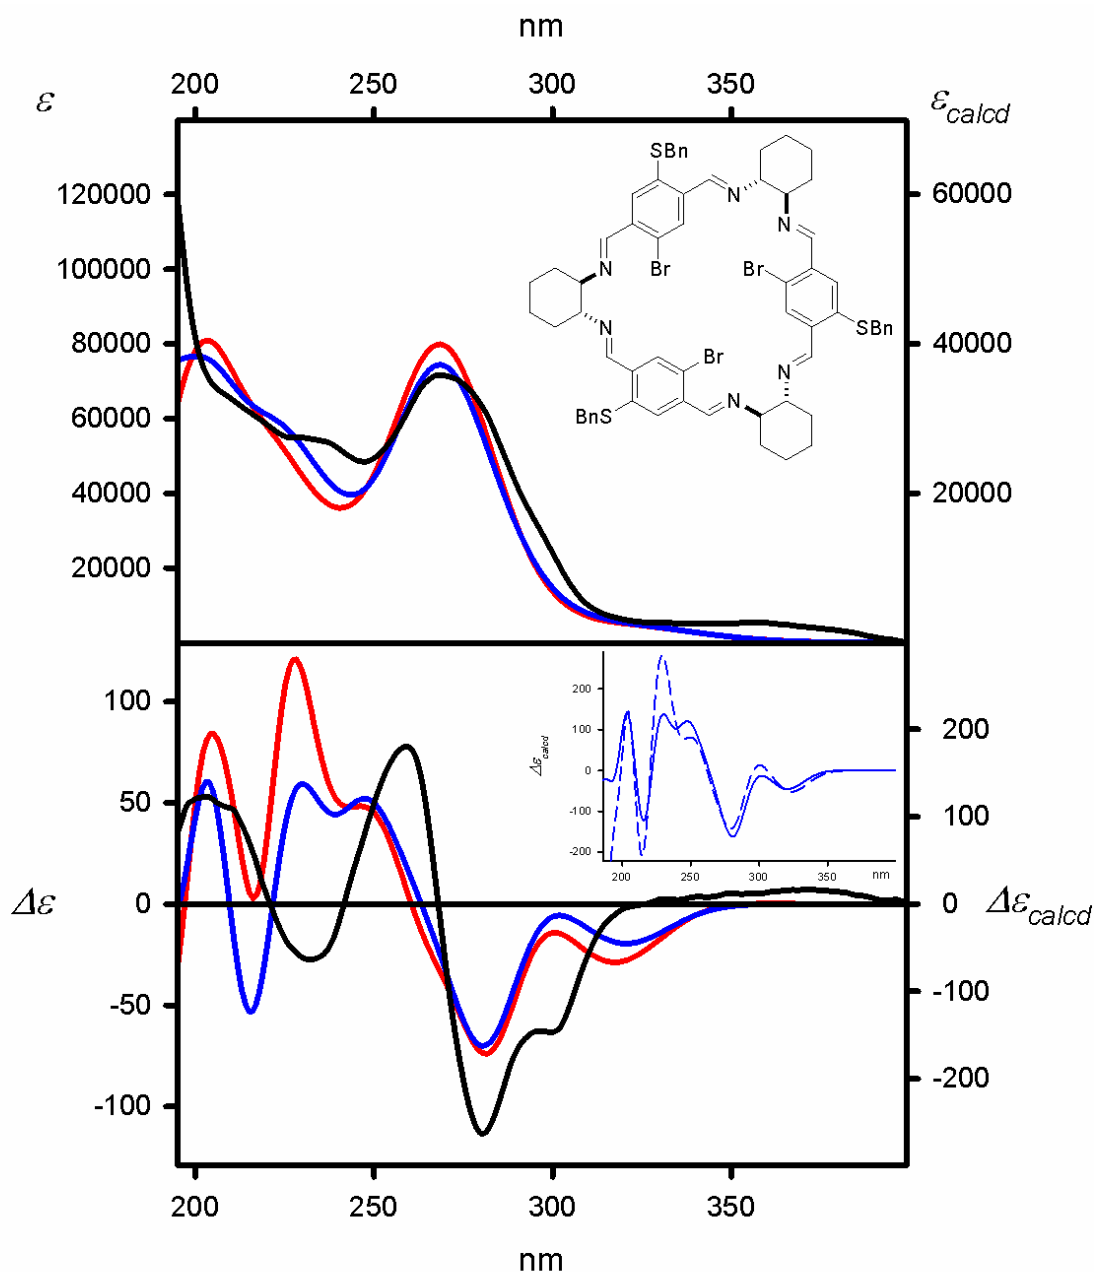

Experimental (cyclohexane, black lines)

Calculated at the  
TD-M06-2X/6-311G(d,p) level and:

$\Delta E$ -based Boltzmann averaged (red lines)

$\Delta\Delta G$ -based Boltzmann averaged (blue lines)

Geometry optimized at the  
M06L/6-311G(d,p) level

**Figure S85.** UV (upper panel) and ECD (lower panel) spectra of **6g** measured in cyclohexane (solid black lines) and calculated at the TD-M06-2X/6-311G(d,p) level for geometries optimized at the M06L/6-311G(d,p) level. The calculated ECD spectra were Boltzmann-averaged based on  $\Delta E$  (red lines) and  $\Delta\Delta G$  values (blue lines). Wavelengths were corrected to match the experimental UV maxima. The insert shows the comparison between the ECD spectra calculated for the lowest energy conformer of a given compound (dashed blue lines) and the  $\Delta\Delta G$ -based and Boltzmann averaged (solid blue lines).

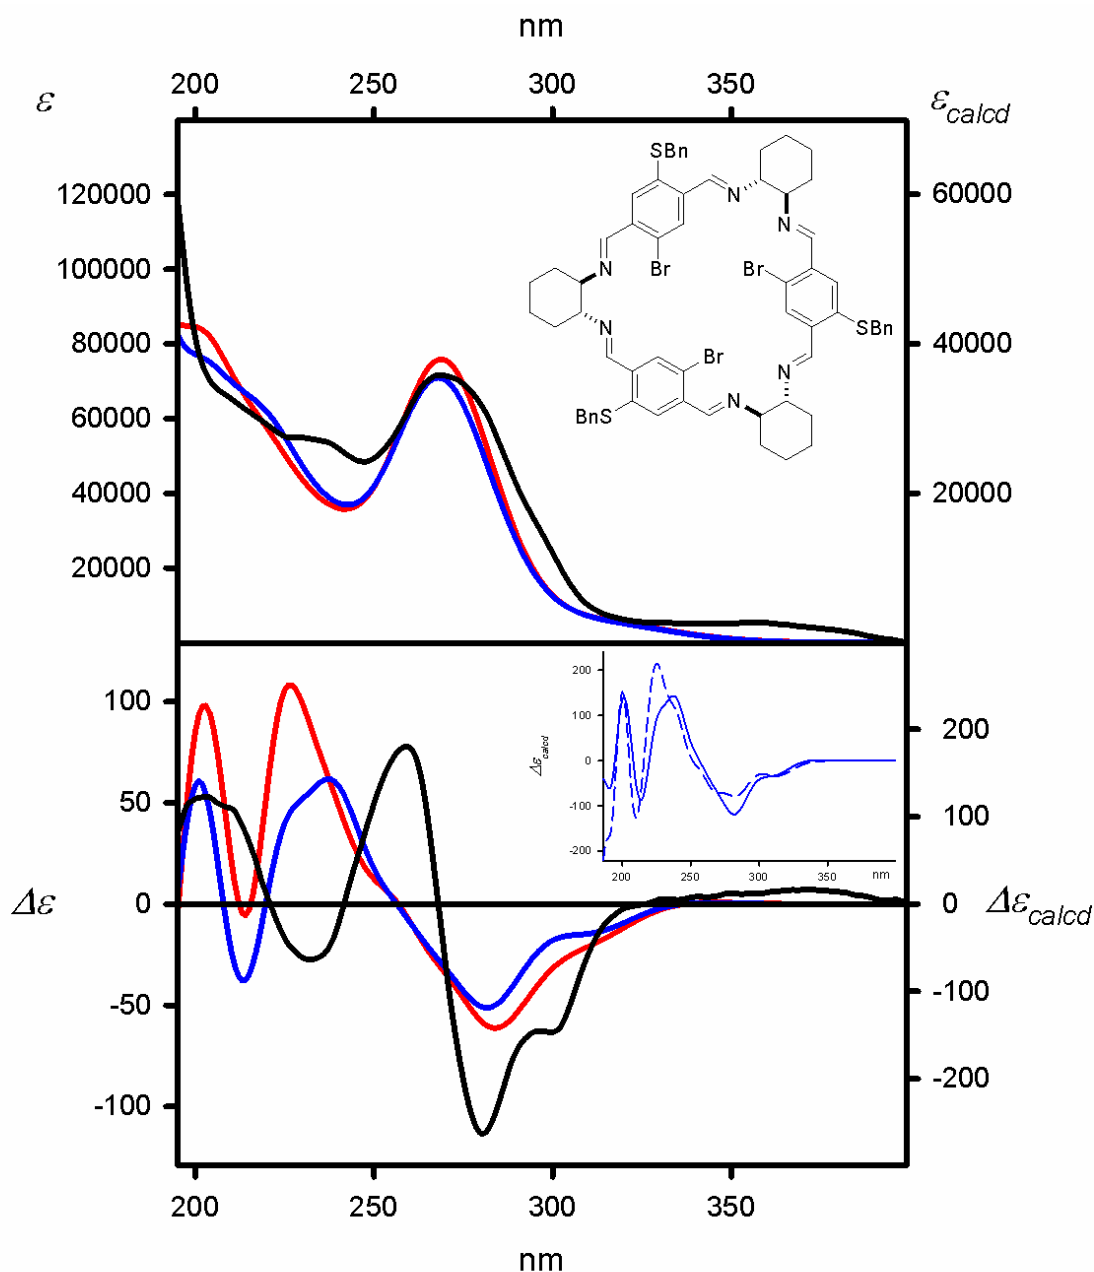

Experimental (cyclohexane, black lines)

Calculated at the  
TD-wB97XD/6-311G(d,p) level and:

$\Delta E$ -based Boltzmann averaged (red lines)

$\Delta\Delta G$ -based Boltzmann averaged (blue lines)

Geometry optimized at the  
M06L/6-311G(d,p) level

**Figure S86.** UV (upper panel) and ECD (lower panel) spectra of **6g** measured in cyclohexane (solid black lines) and calculated at the TD-wB97XD/6-311G(d,p) level for geometries optimized at the M06L/6-311G(d,p) level. The calculated ECD spectra were Boltzmann-averaged based on  $\Delta E$  (red lines) and  $\Delta\Delta G$  values (blue lines). Wavelengths were corrected to match the experimental UV maxima. The insert shows the comparison between the ECD spectra calculated for the lowest energy conformer of a given compound (dashed blue lines) and the  $\Delta\Delta G$ -based and Boltzmann averaged (solid blue lines).



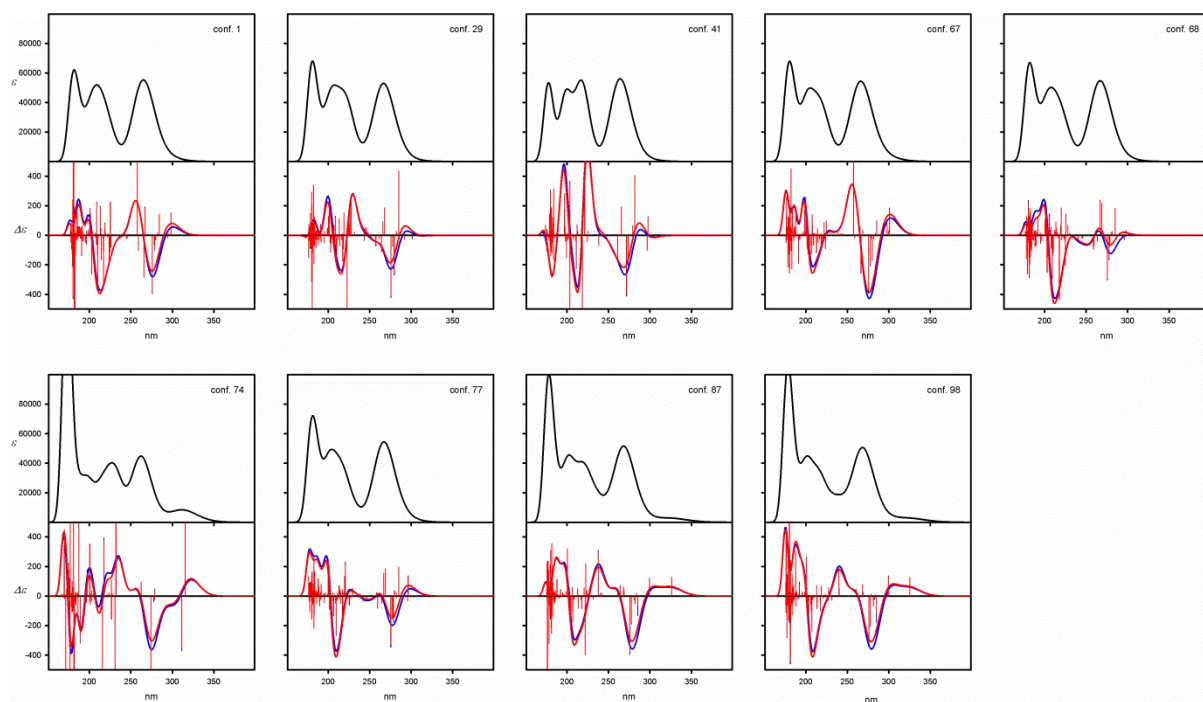

**Figure S87.** UV (upper panels) and ECD (lower panels) spectra calculated at the TD-CAM-B3LYP/6-311G(d,p) level for individual, symmetrical low-energy conformers of **6g**. Wavelengths were not corrected. Geometries were optimized at the B3LYP/6-311G(d,p) level.

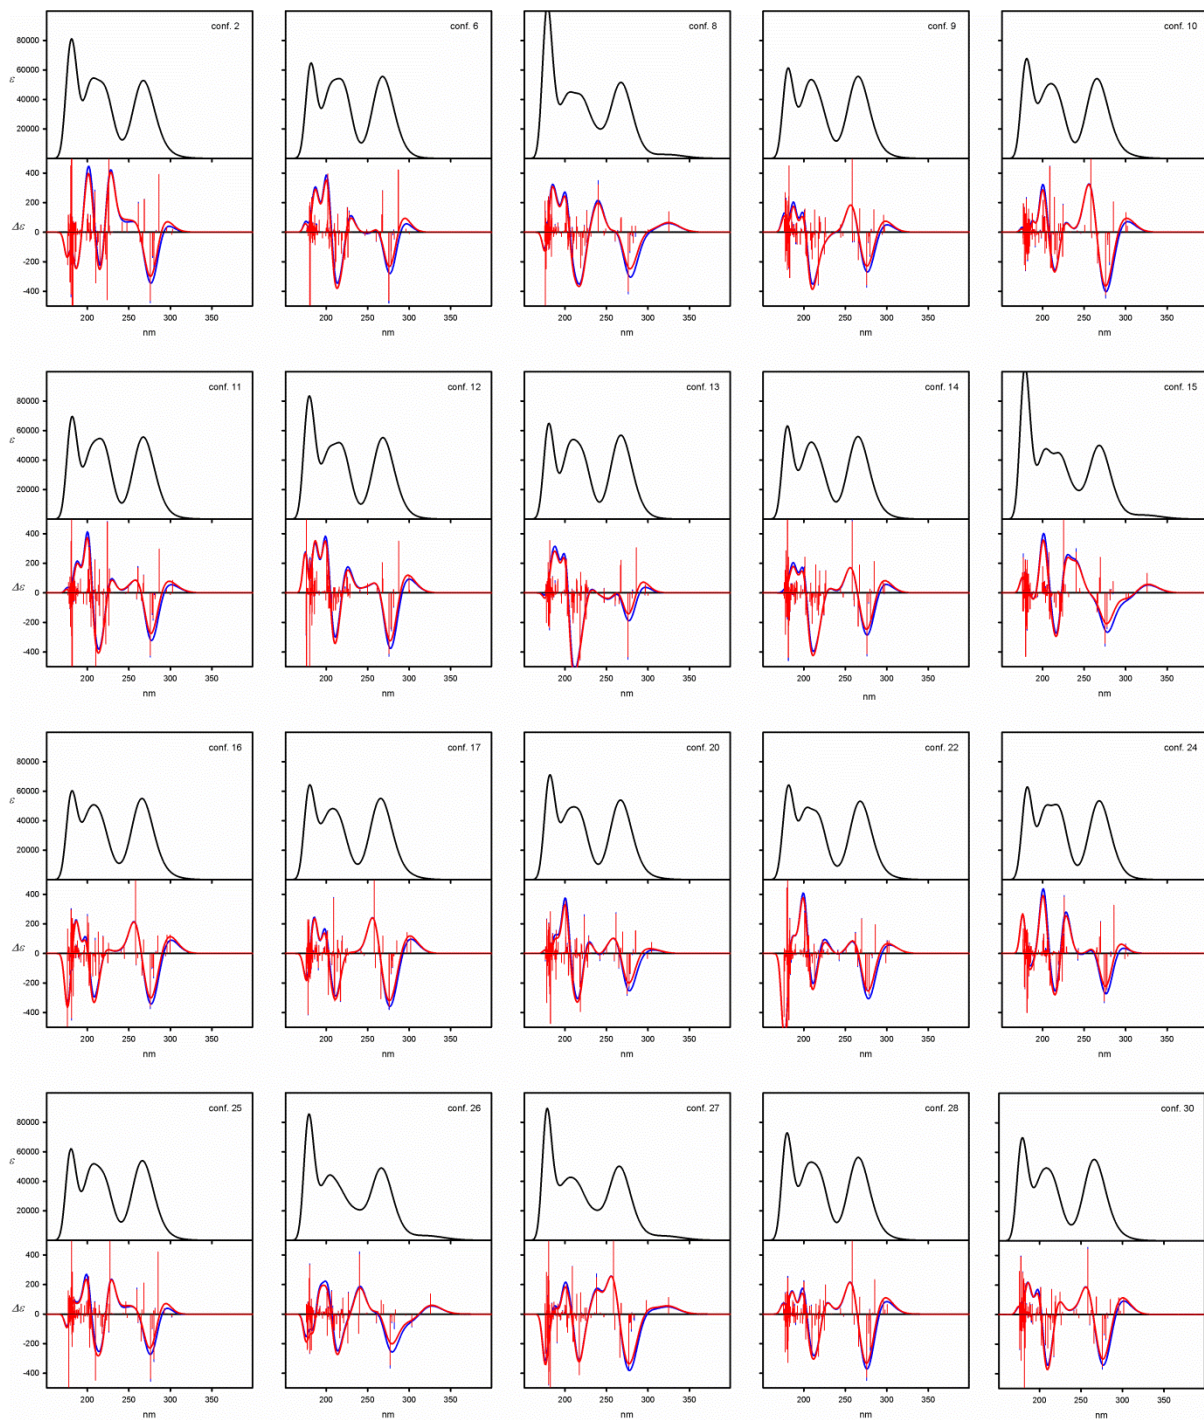



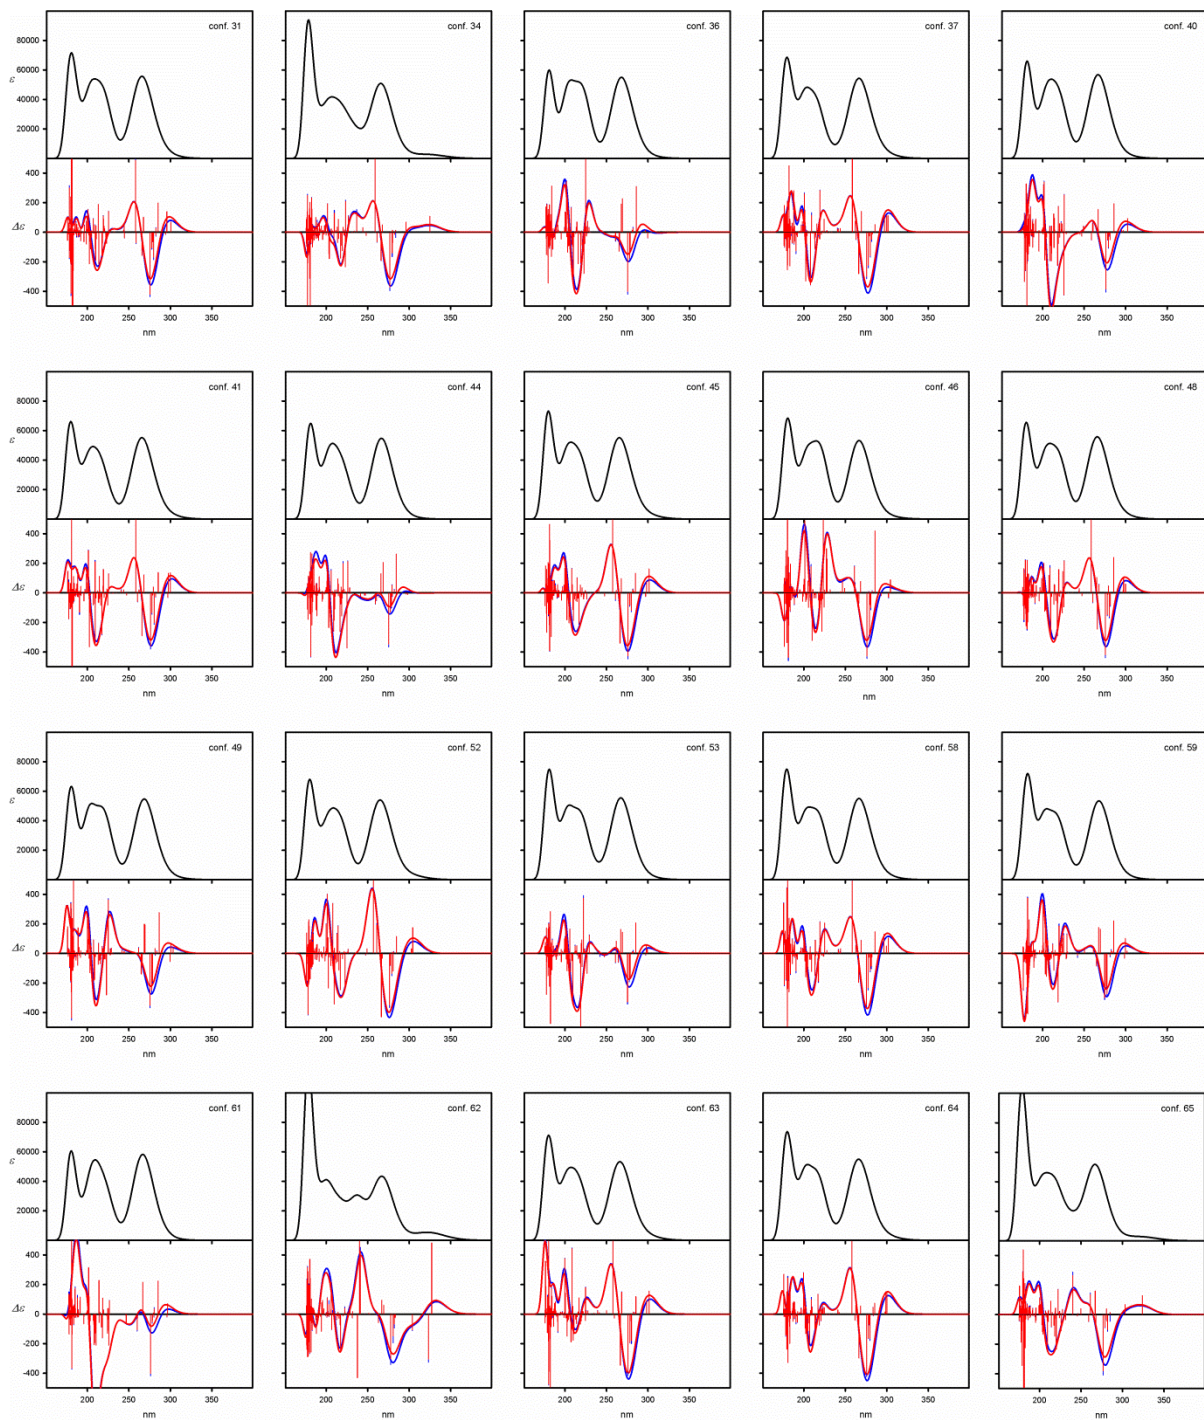



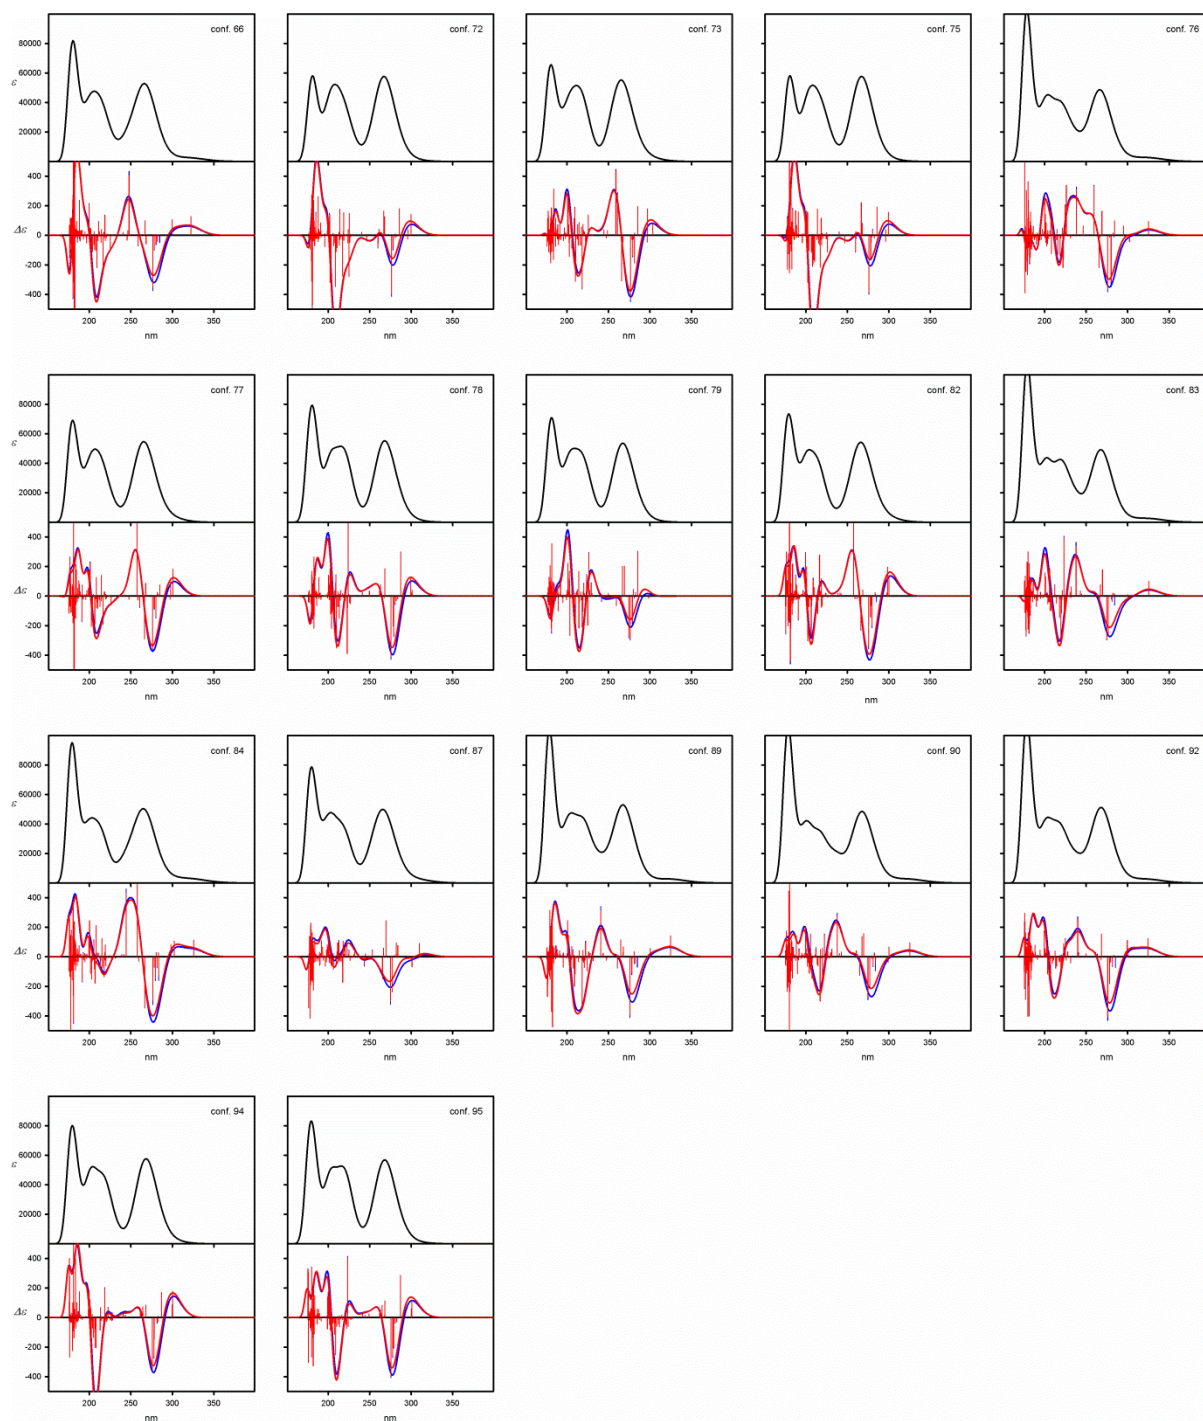

**Figure S88.** UV (upper panels) and ECD (lower panels) spectra calculated at the TD-CAM-B3LYP/6-311G(d,p) level for individual, non-symmetrical low-energy conformers of **6g**. Wavelengths were not corrected. Geometries were optimized at the B3LYP/6-311G(d,p) level.



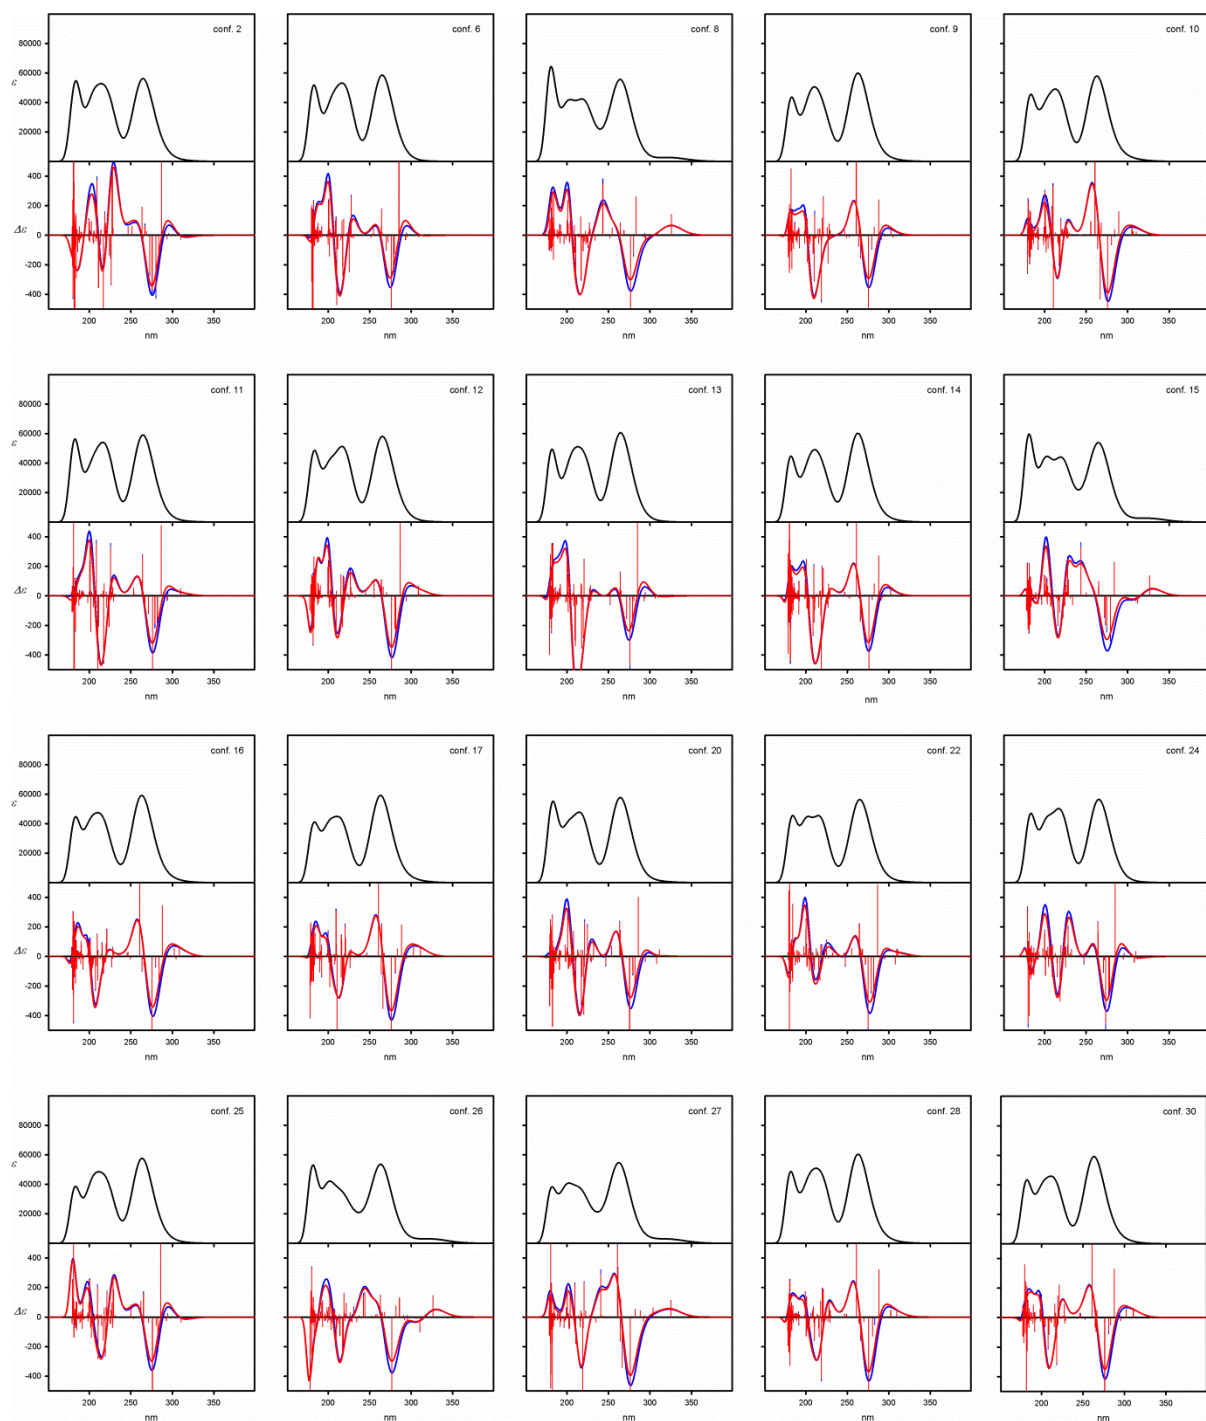

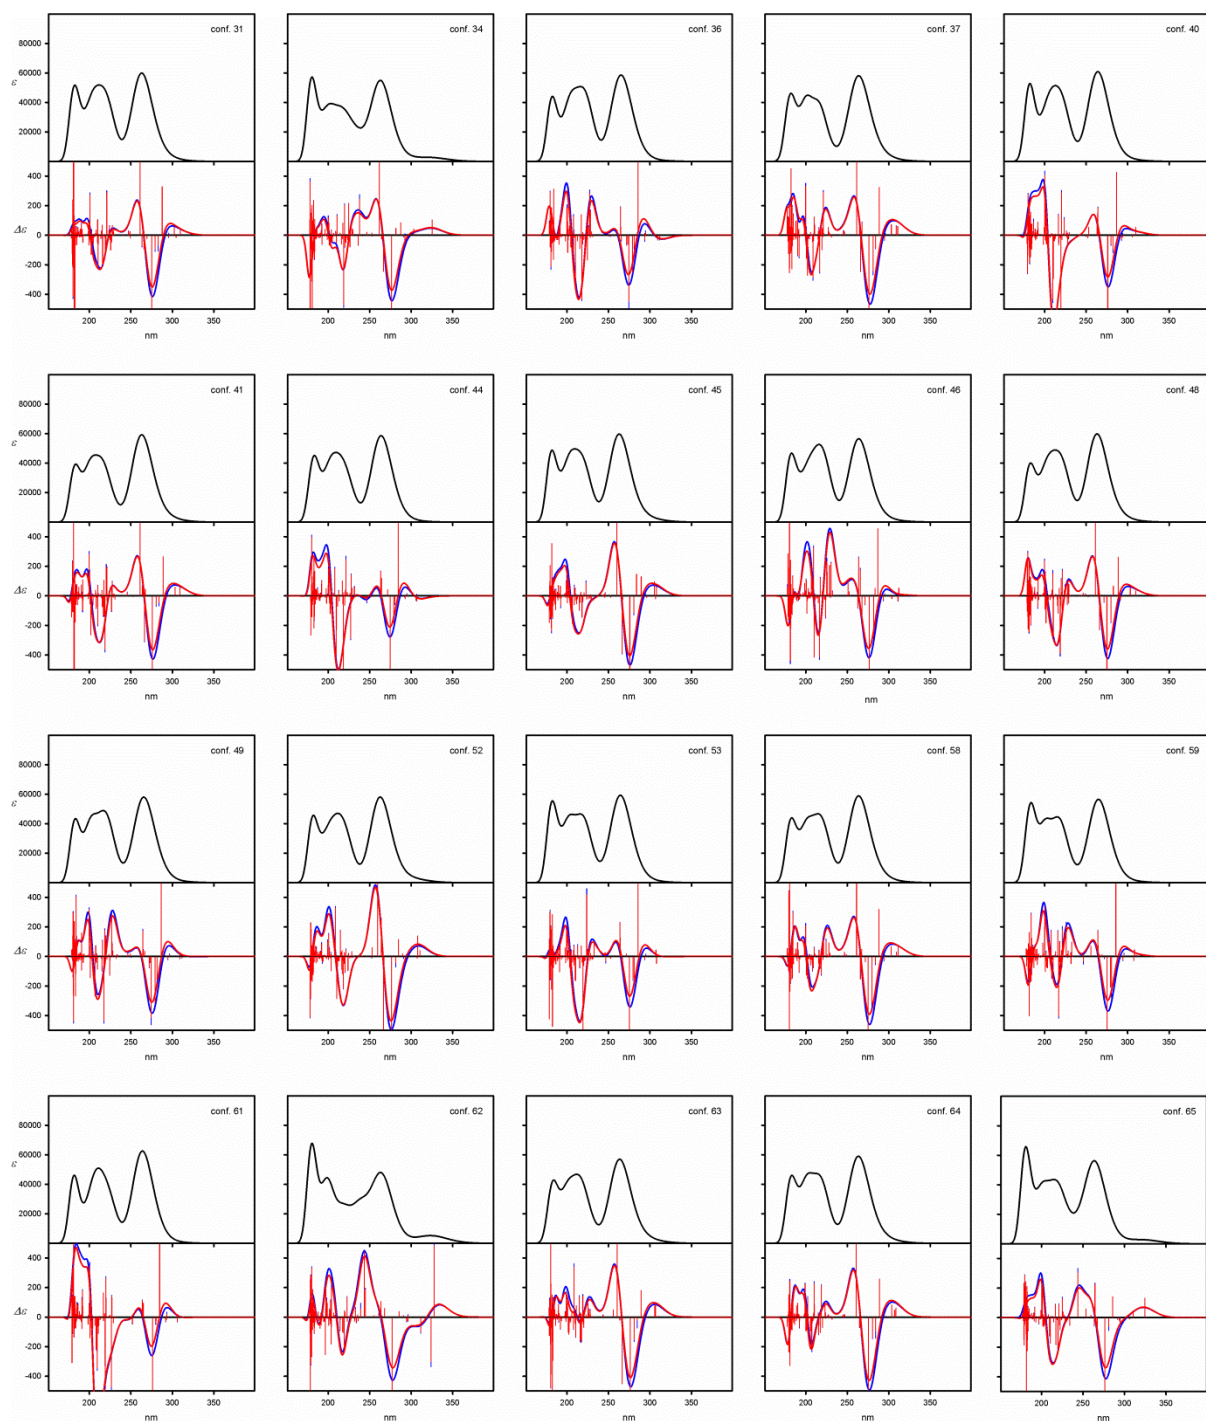



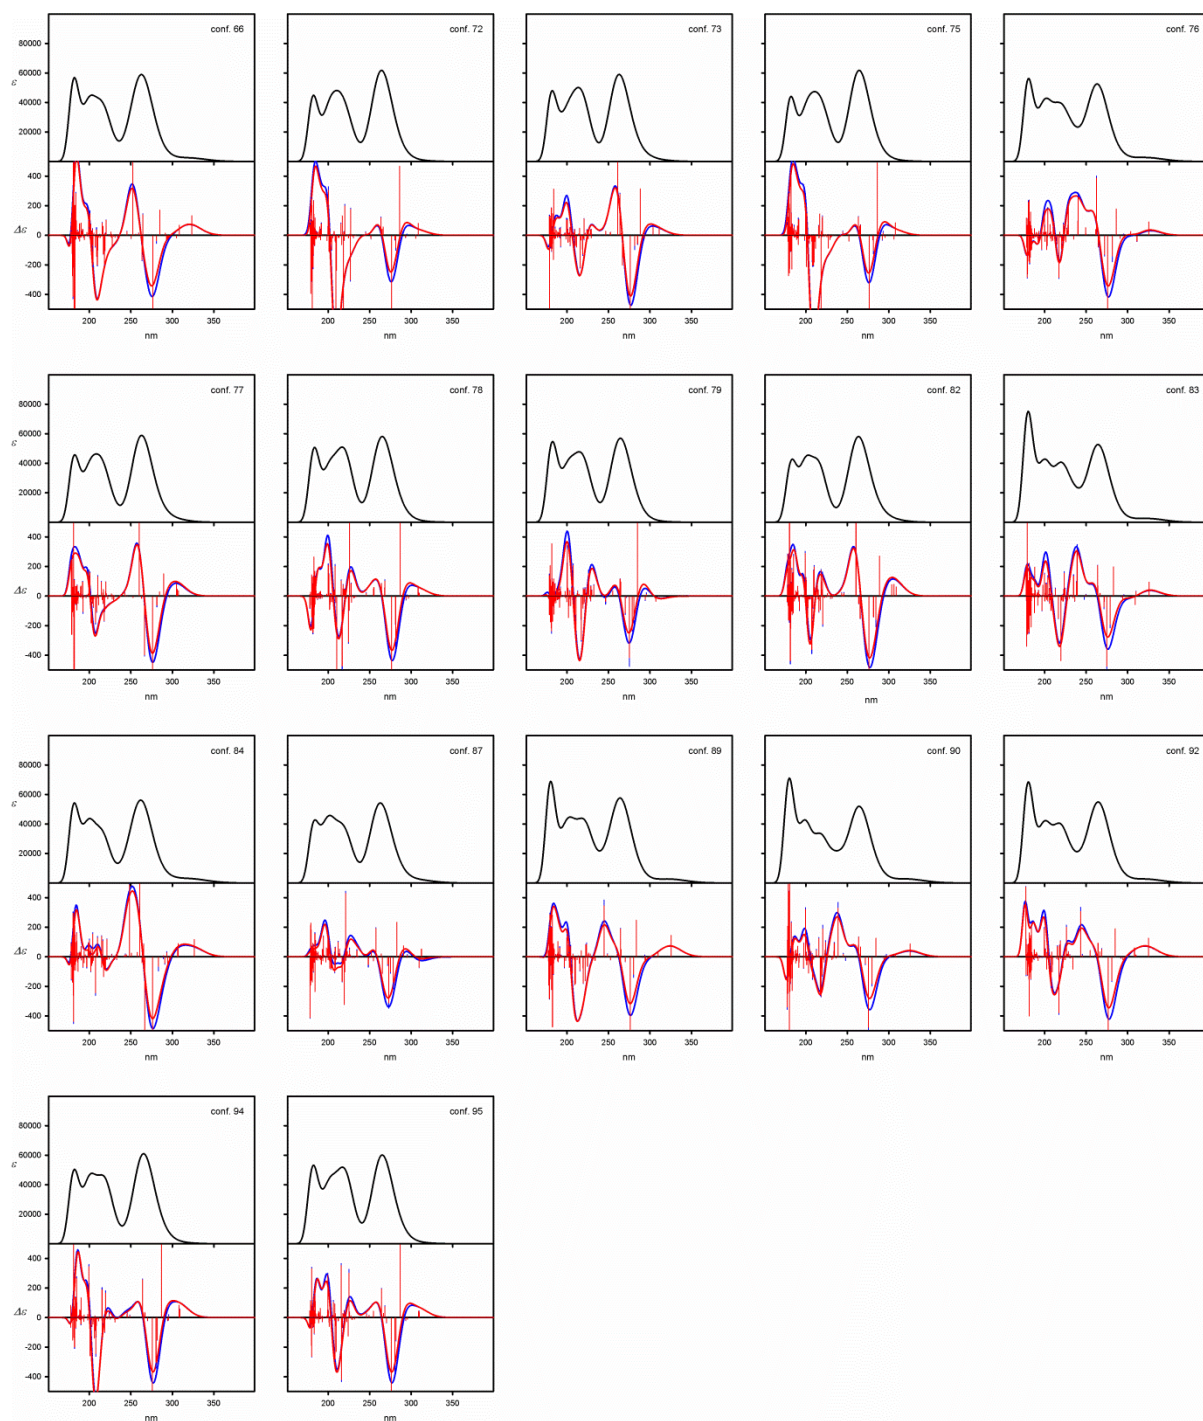

**Figure S89.** UV (upper panels) and ECD (lower panels) spectra calculated at the TD-M06-2X/6-311G(d,p) level for individual, symmetrical low-energy conformers of **6g**. Wavelengths were not corrected. Geometries were optimized at the B3LYP/6-311G(d,p) level.



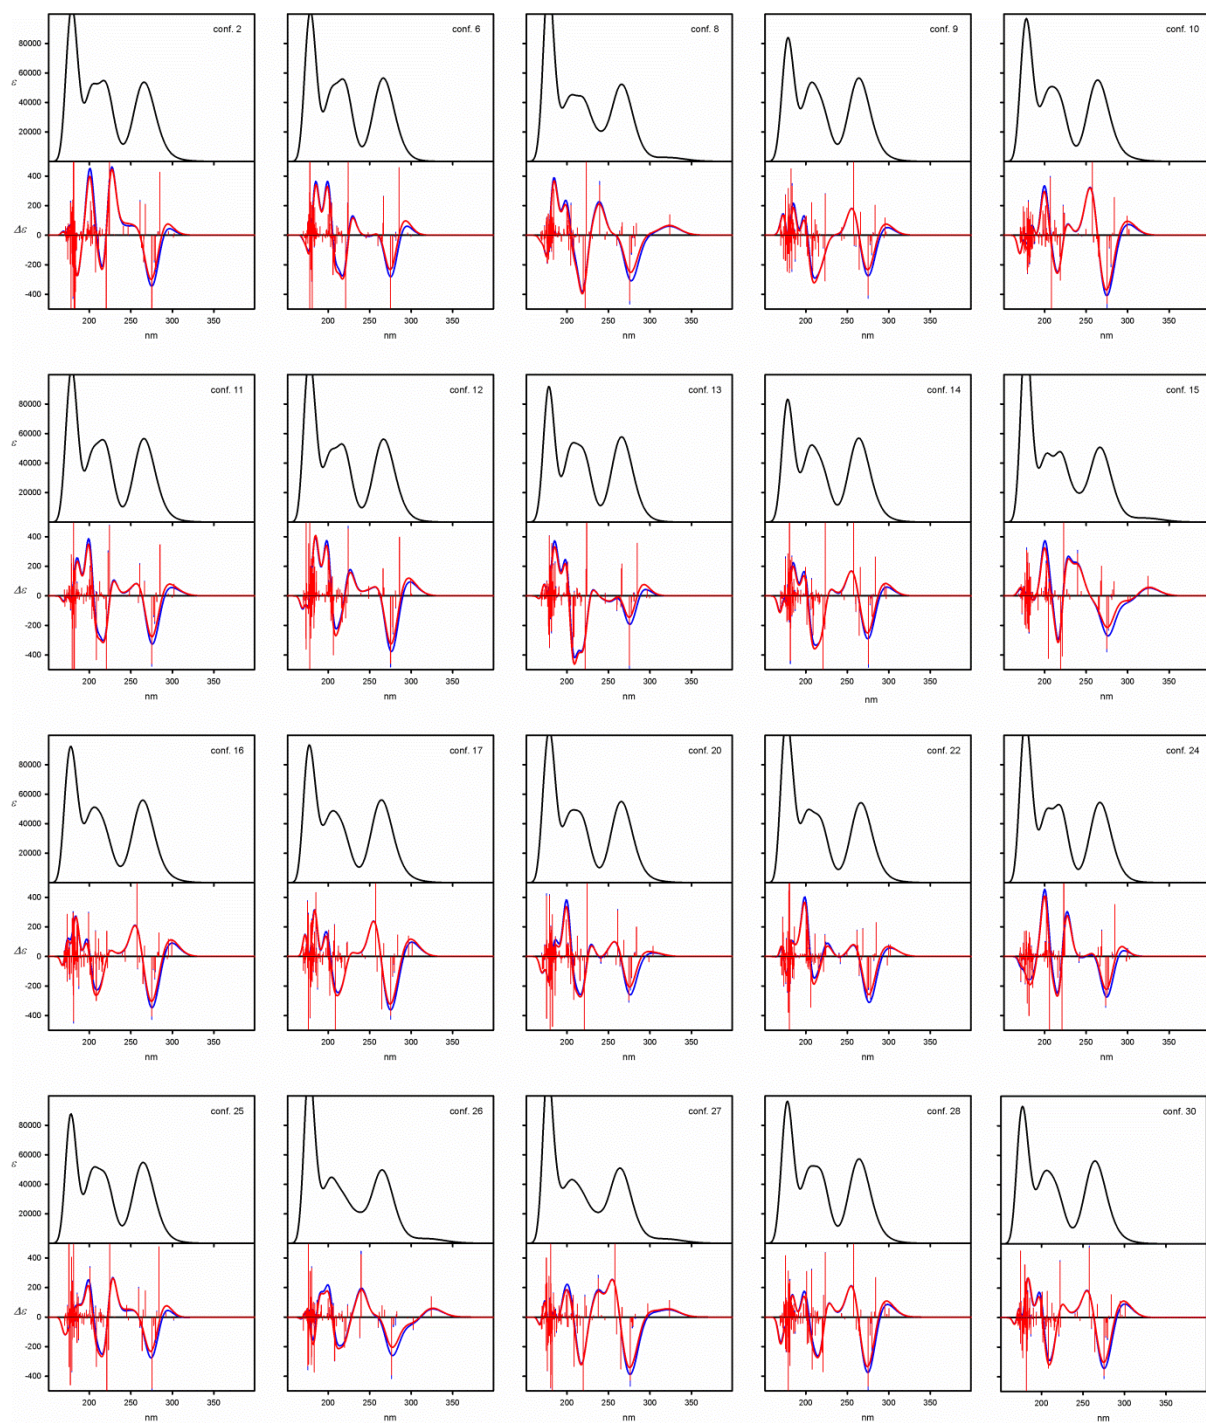



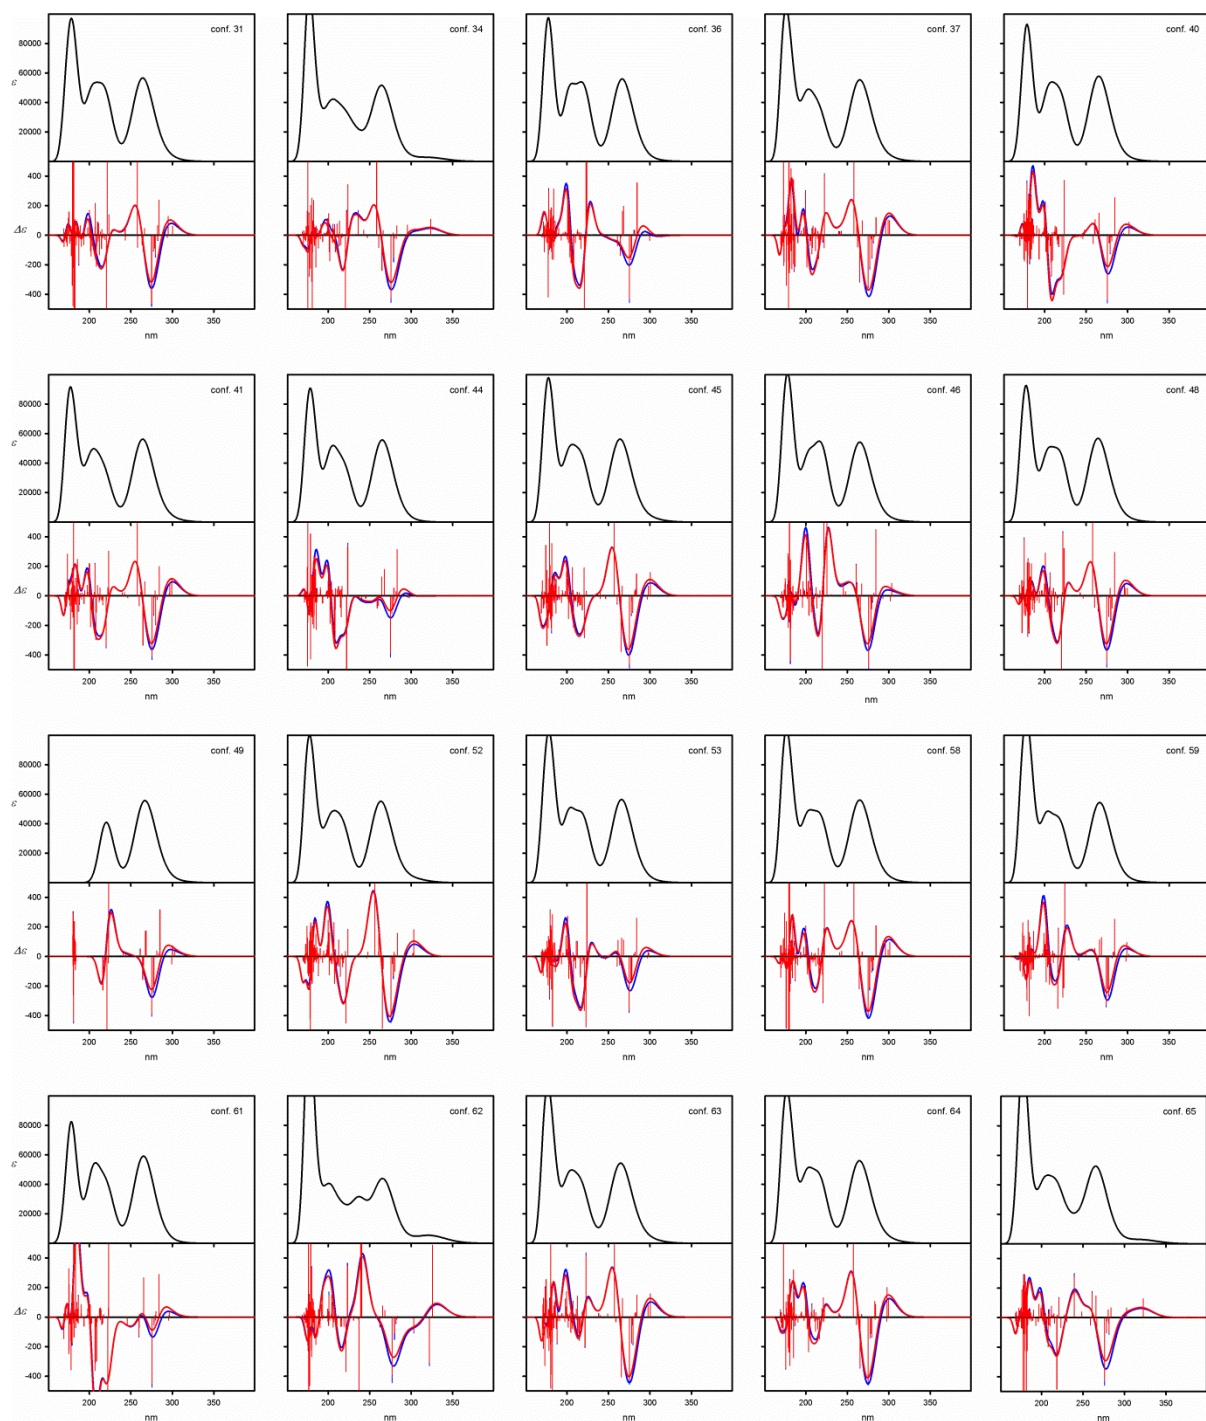



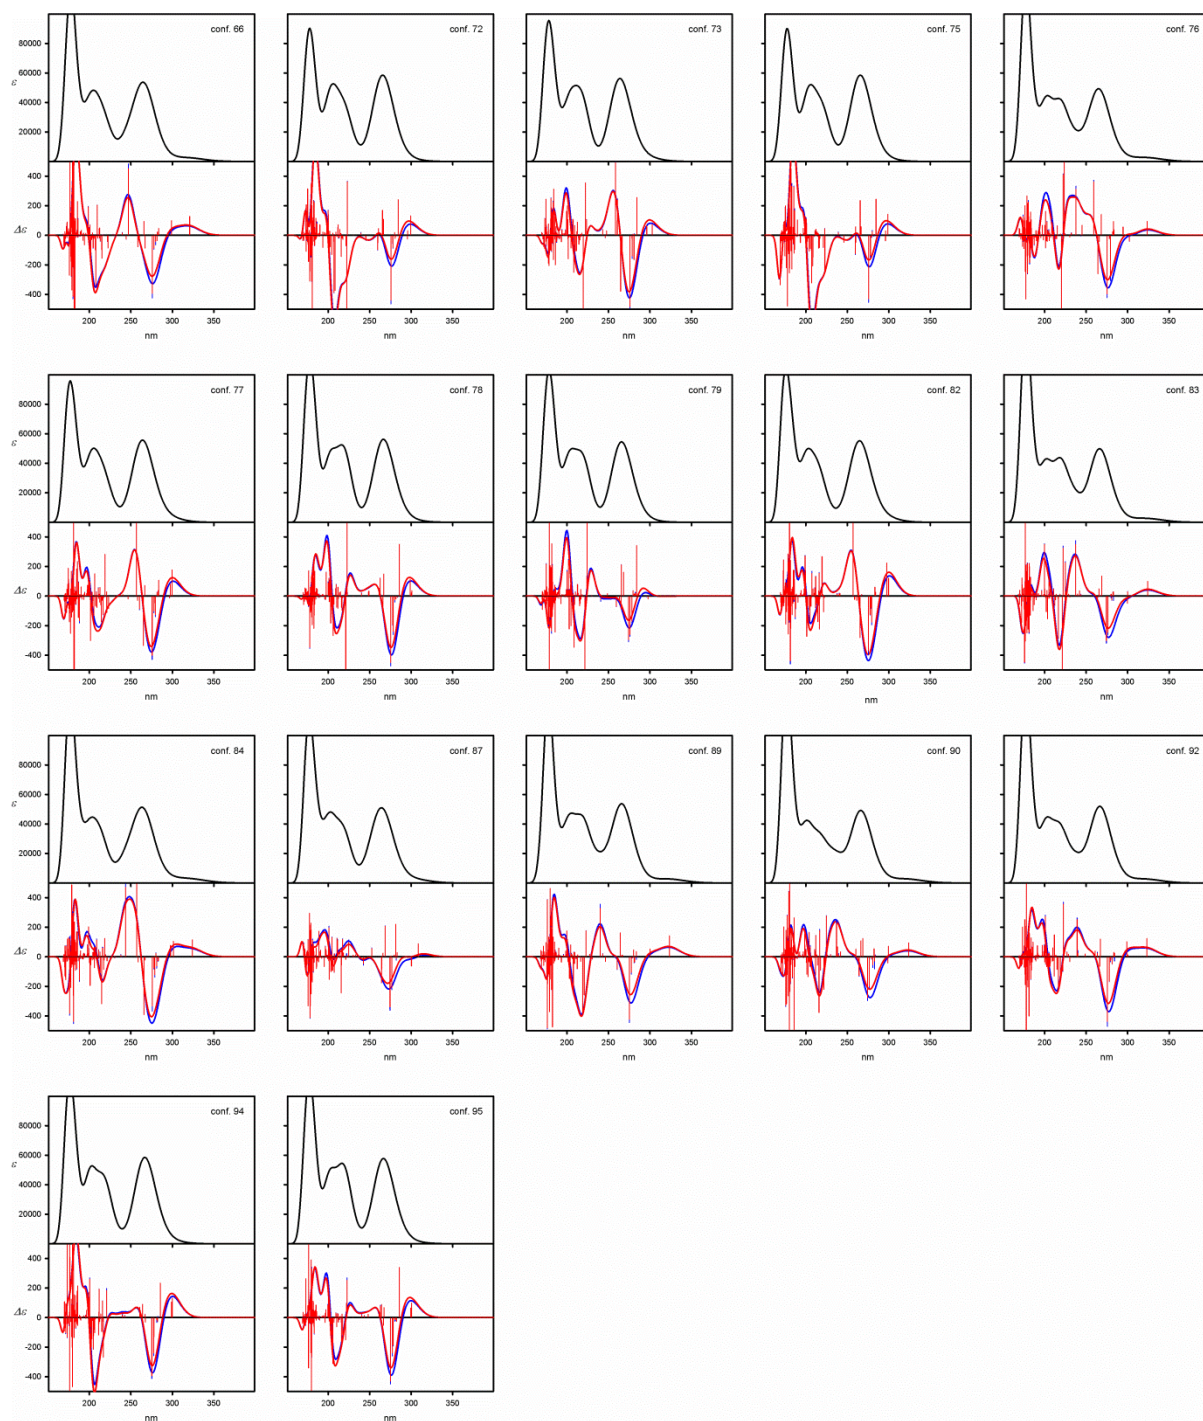

**Figure S90.** UV (upper panels) and ECD (lower panels) spectra calculated at the TD-M06-2X/6-311G(d,p) level for individual, non-symmetrical low-energy conformers of **6g**. Wavelengths were not corrected. Geometries were optimized at the B3LYP/6-311G(d,p) level.

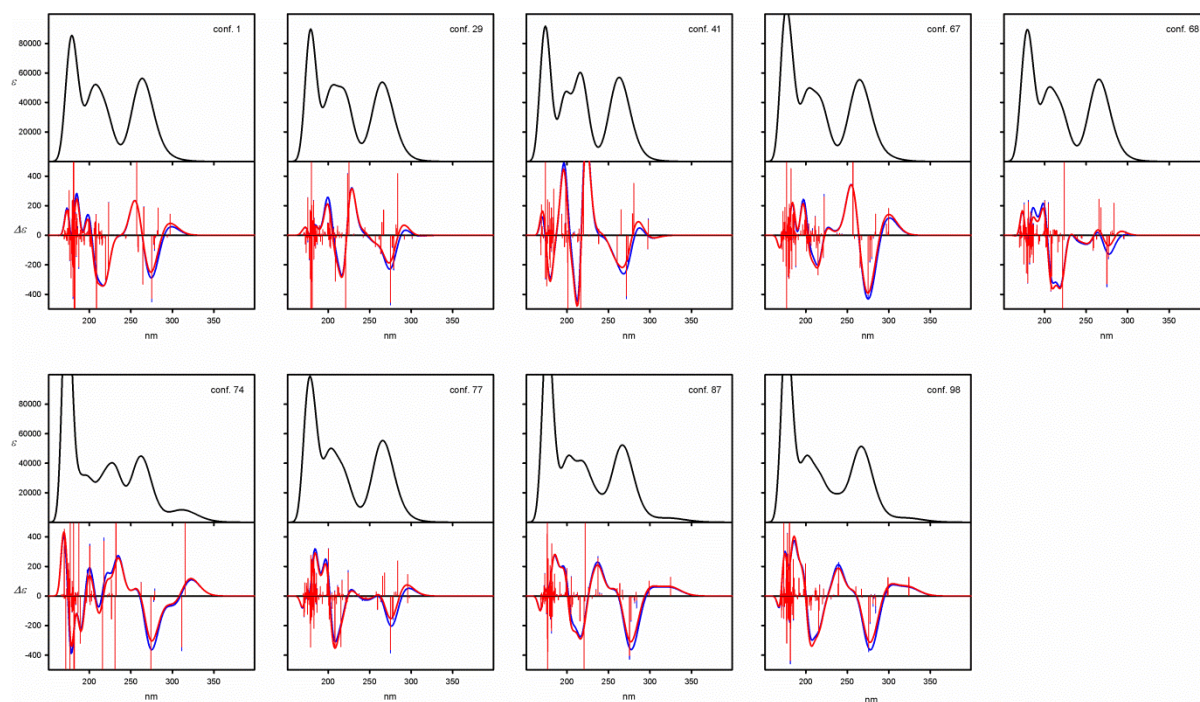

**Figure S91.** UV (upper panels) and ECD (lower panels) spectra calculated at the TD-wB97XD/6-311G(d,p) level for individual, symmetrical low-energy conformers of **6g**. Wavelengths were not corrected. Geometries were optimized at the B3LYP/6-311G(d,p) level.













**Figure S92.** UV (upper panels) and ECD (lower panels) spectra calculated at the TD-wB97XD/6-311G(d,p) level for individual, non-symmetrical low-energy conformers of **6g**. Wavelengths were not corrected. Geometries were optimized at the B3LYP/6-311G(d,p) level.



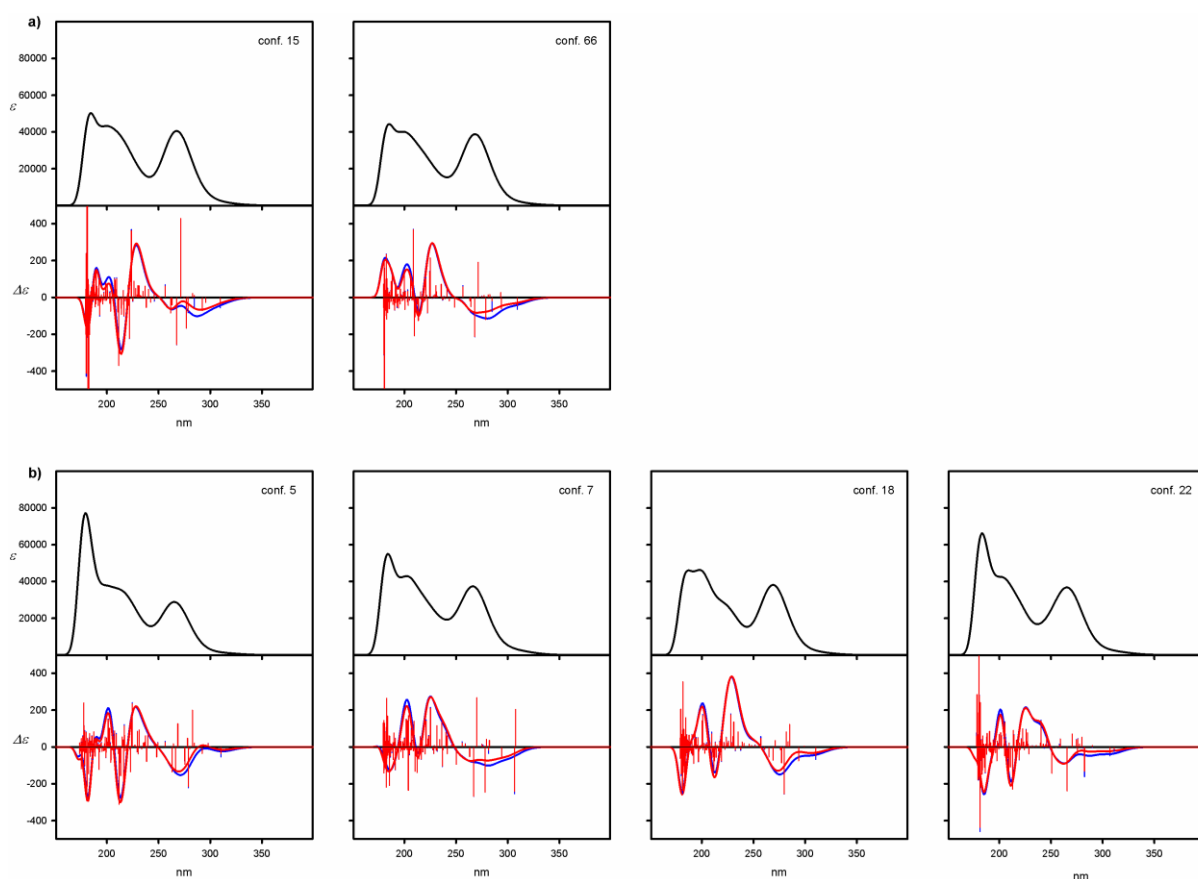

**Figure S93.** UV (upper panels) and ECD (lower panels) spectra calculated at the TD-CAM-B3LYP/6-311G(d,p) level for individual, a) symmetrical and b) non-symmetrical low-energy conformers of **6g**. Wavelengths were not corrected. Geometries were optimized at the B3LYP-GD3BJ/6-311G(d,p) level.

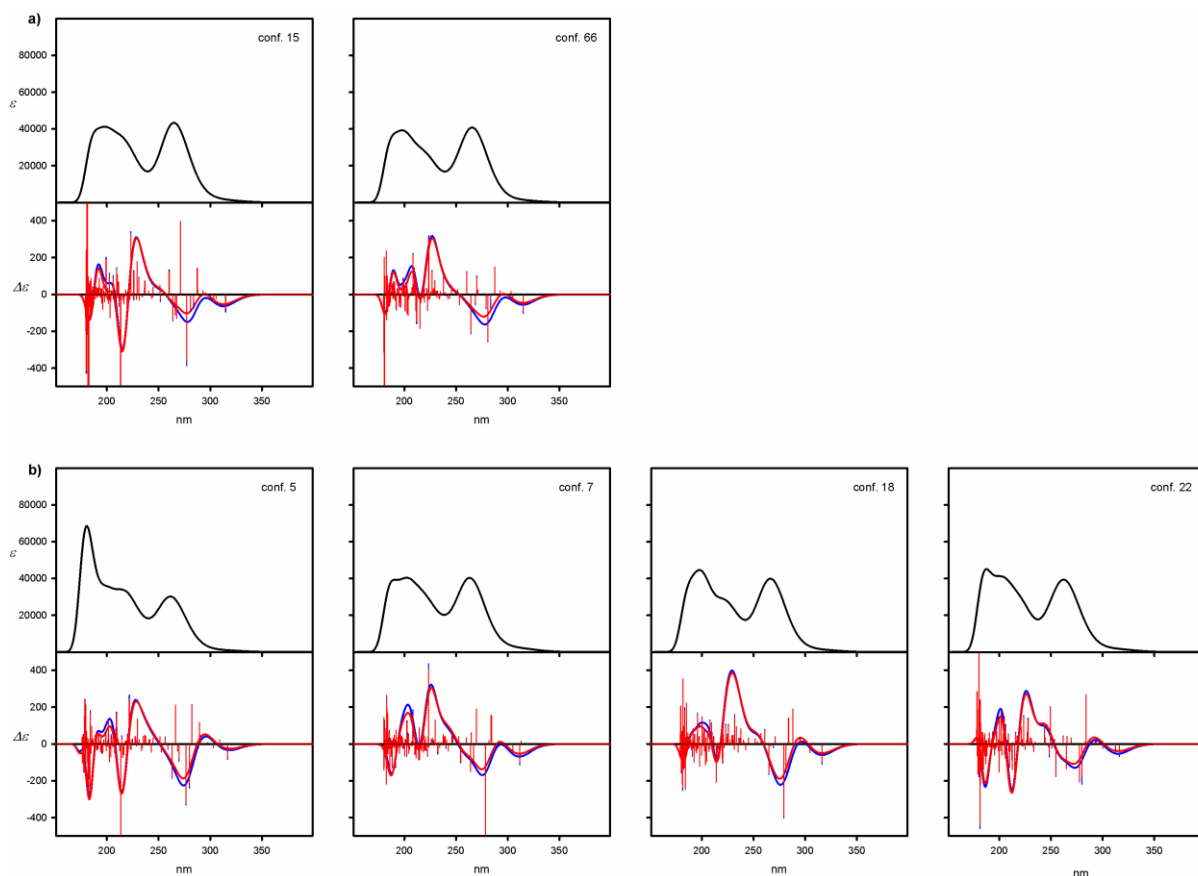

**Figure S94.** UV (upper panels) and ECD (lower panels) spectra calculated at the TD-M06-2X/6-311G(d,p) level for individual, a) symmetrical and b) non-symmetrical low-energy conformers of **6g**. Wavelengths were not corrected. Geometries were optimized at the B3LYP-GD3BJ/6-311G(d,p) level.

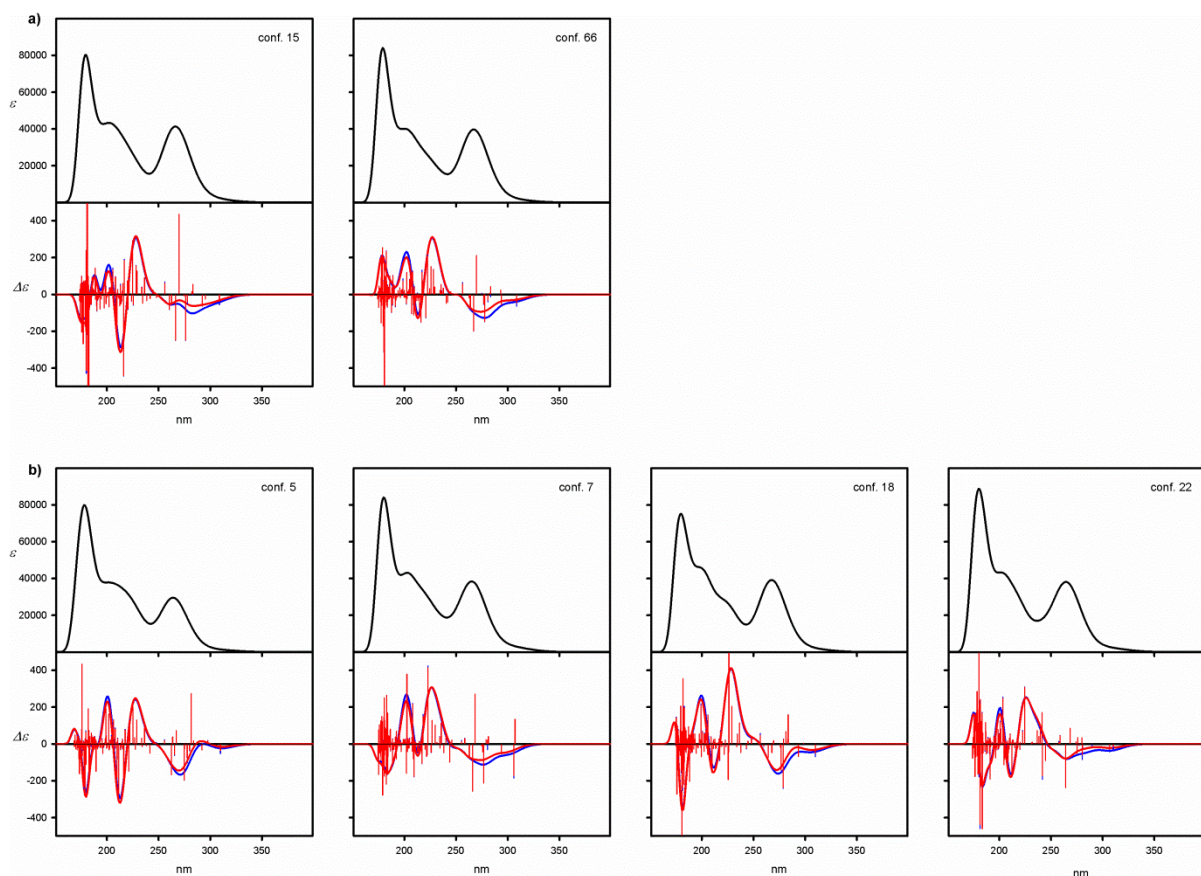

**Figure S95.** UV (upper panels) and ECD (lower panels) spectra calculated at the TD-wB97XD/6-311G(d,p) level for individual, a) symmetrical and b) non-symmetrical low-energy conformers of **6g**. Wavelengths were not corrected. Geometries were optimized at the B3LYP-GD3BJ/6-311G(d,p) level.

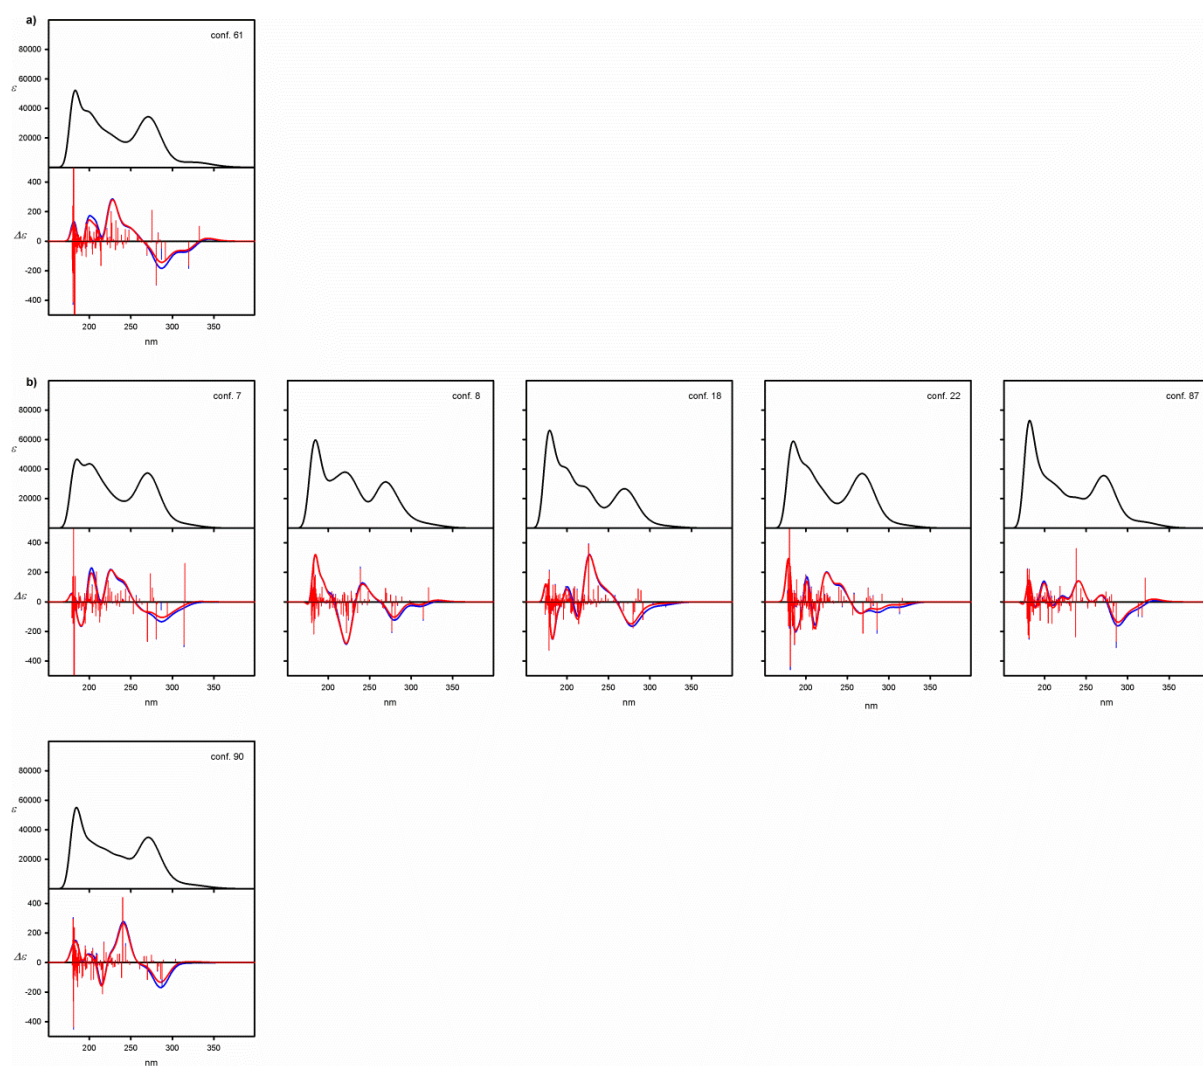

**Figure S96.** UV (upper panels) and ECD (lower panels) spectra calculated at the TD-CAM-B3LYP/6-311G(d,p) level for individual, a) symmetrical and b) non-symmetrical low-energy conformers of **6g**. Wavelengths were not corrected. Geometries were optimized at the M06L/6-311G(d,p) level.

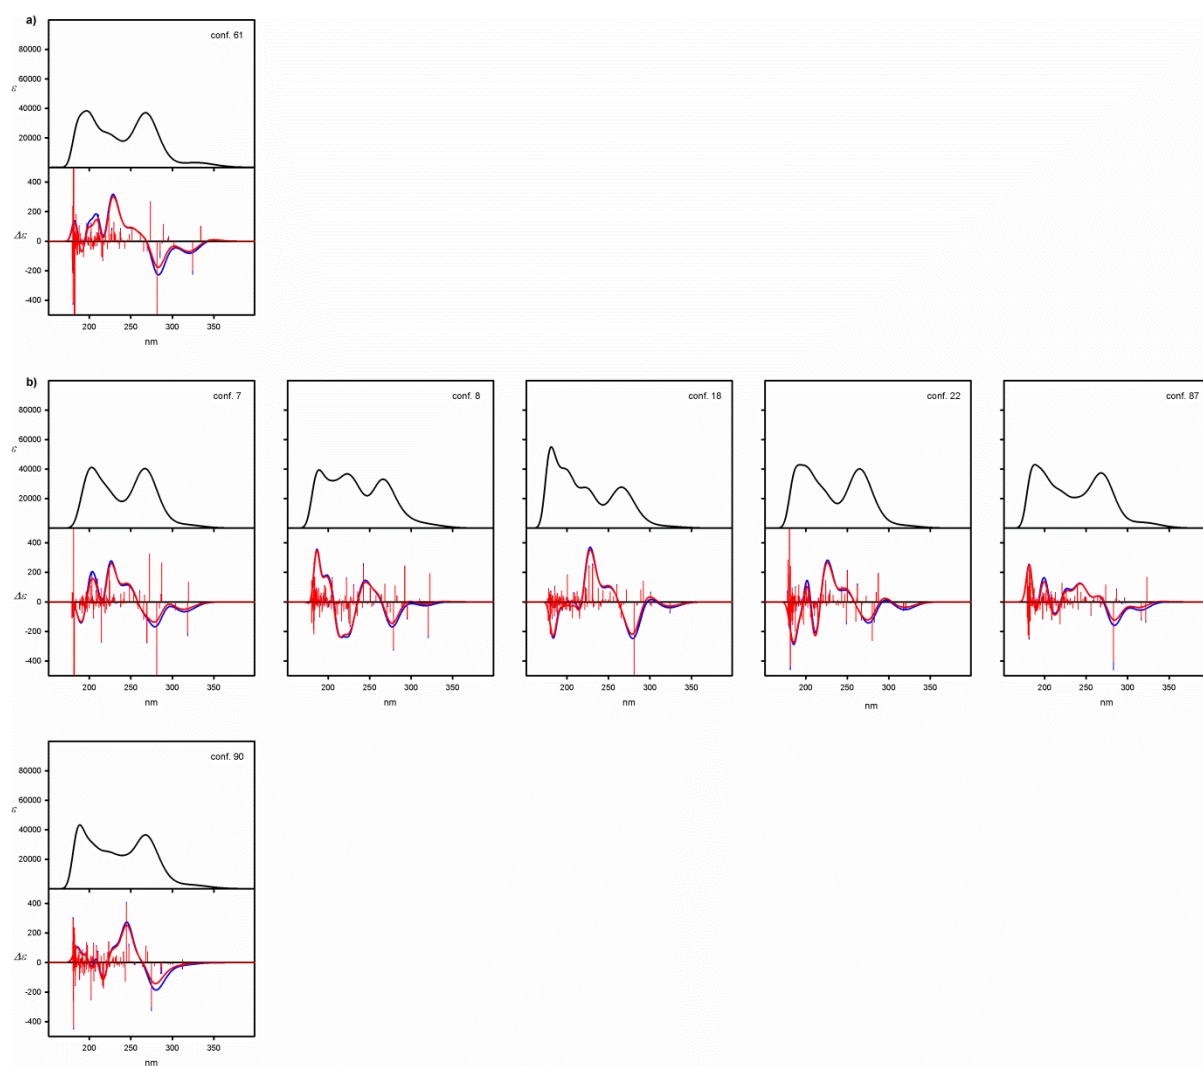

**Figure S97.** UV (upper panels) and ECD (lower panels) spectra calculated at the TD-M06-2X/6-311G(d,p) level for individual, a) symmetrical and b) non-symmetrical low-energy conformers of **6g**. Wavelengths were not corrected. Geometries were optimized at the M06L/6-311G(d,p) level.

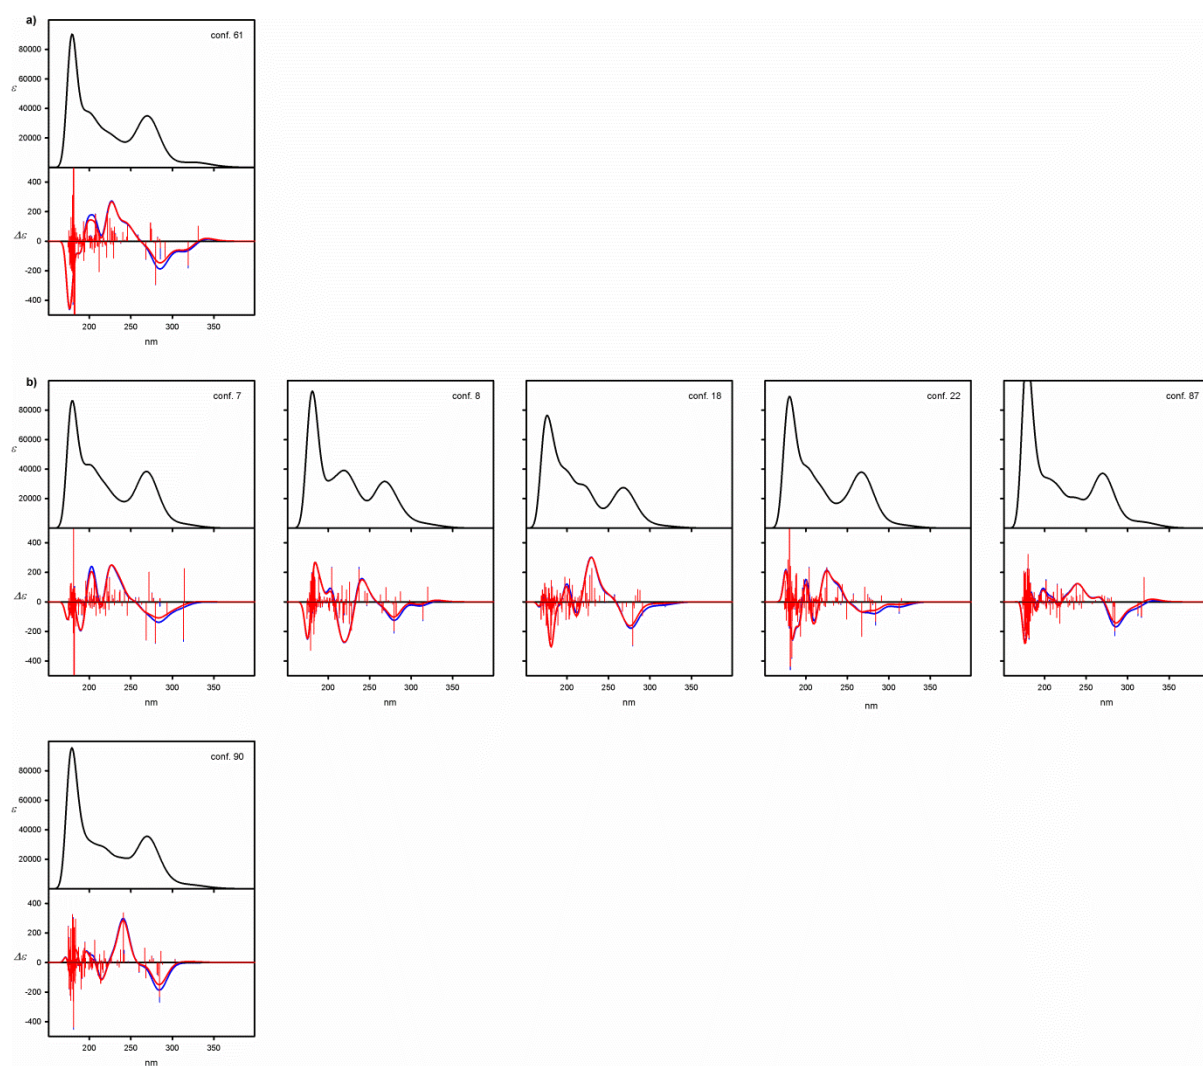

**Figure S98.** UV (upper panels) and ECD (lower panels) spectra calculated at the TD-wB97XD/6-311G(d,p) level for individual, a) symmetrical and b) non-symmetrical low-energy conformers of **6g**. Wavelengths were not corrected. Geometries were optimized at the M06L/6-311G(d,p) level.



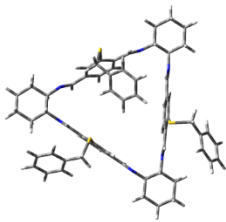

conf. sym-1

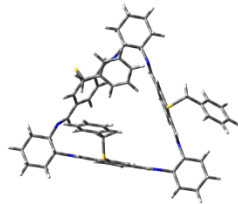

conf. sym-29

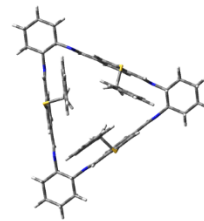

conf. sym-41

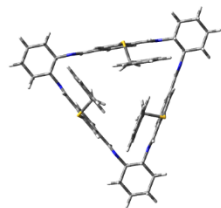

conf. sym-45

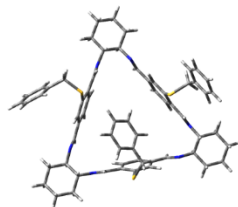

conf. sym-67

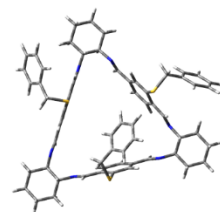

conf. sym-68

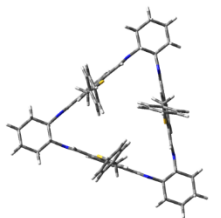

conf. sym-74

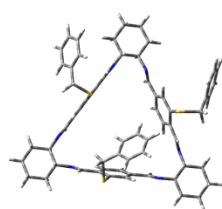

conf. sym-77

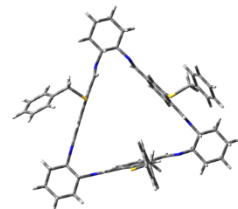

conf. sym-87

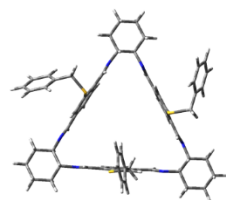

conf. sym-98

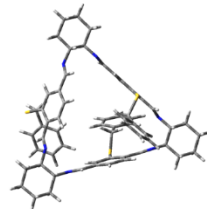

conf. 2

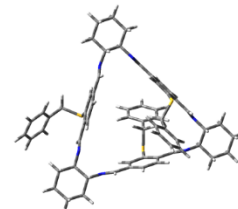

conf. 6

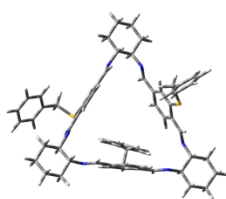

conf. 8

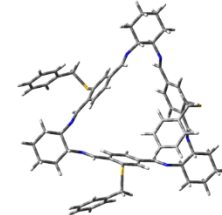

conf. 9

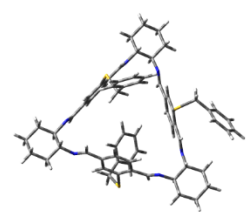

conf. 10

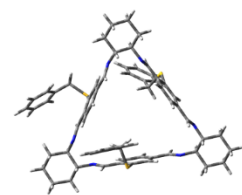

conf. 11

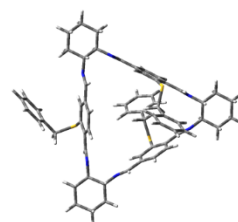

conf. 12

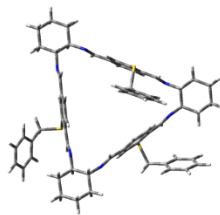

conf. 13



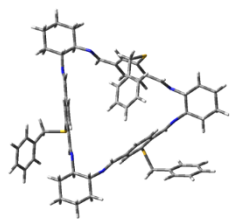

conf. 14

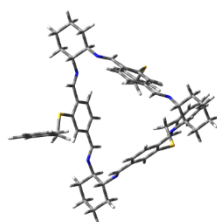

conf. 15

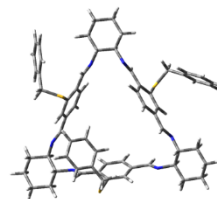

conf. 16

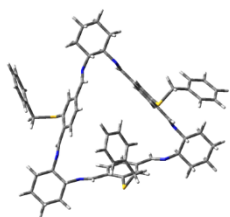

conf. 17

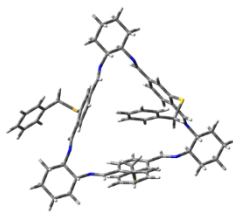

conf. 19

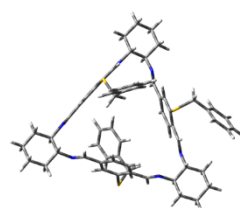

conf. 20

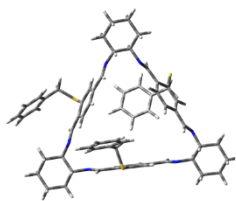

conf. 21

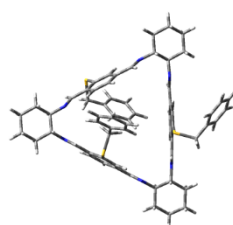

conf. 22

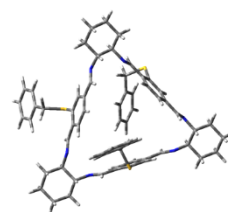

conf. 23

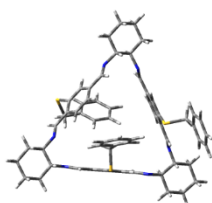

conf. 24

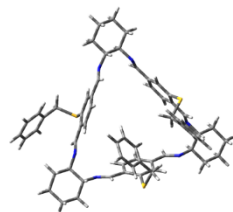

conf. 25

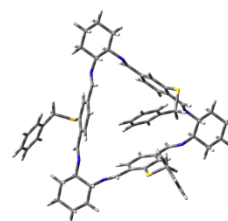

conf. 26

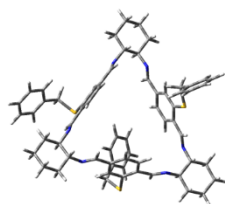

conf. 27

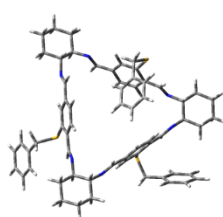

conf. 28

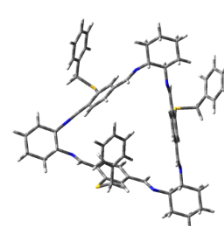

conf. 30

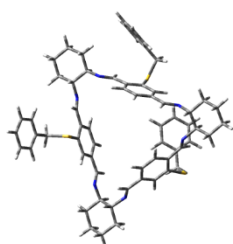

conf. 31

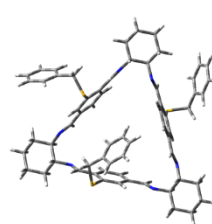

conf. 33

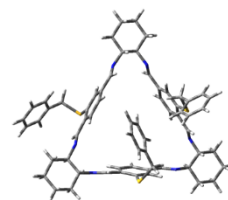

conf. 34

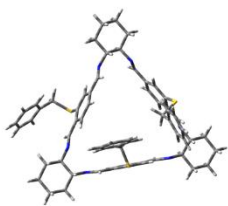

conf. 36

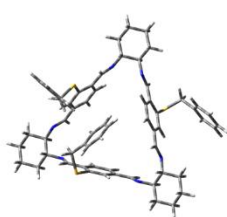

conf. 38

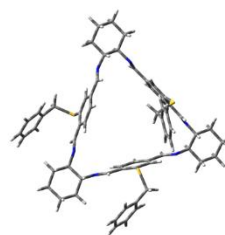

conf. 40

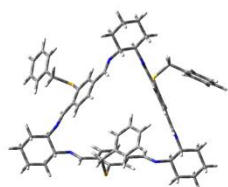

conf. 42

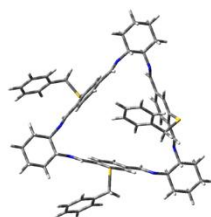

conf. 44

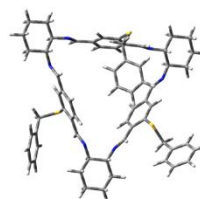

conf. 45

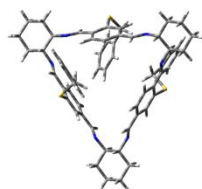

conf. 46

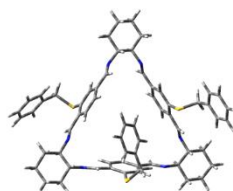

conf. 48

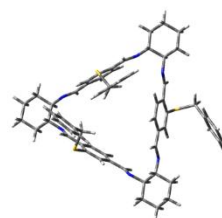

conf. 49

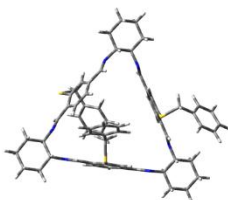

conf. 52

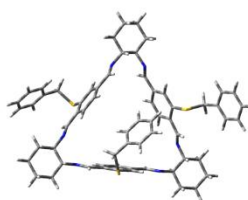

conf. 53

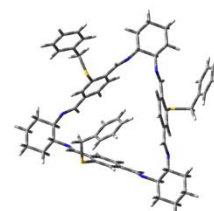

conf. 57

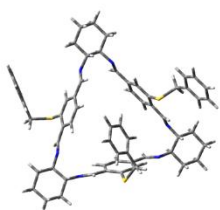

conf. 58

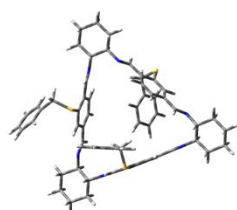

conf. 59

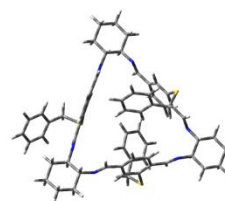

conf. 60

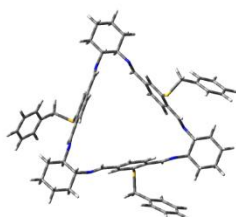

conf. 61

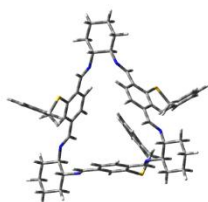

conf. 62

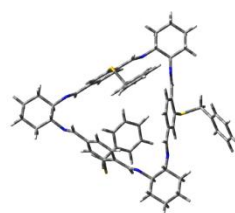

conf. 63

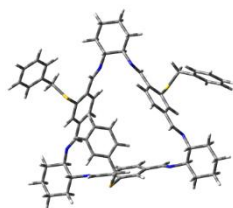

conf. 64

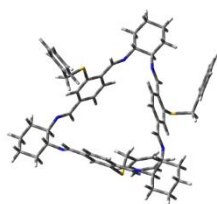

conf. 65

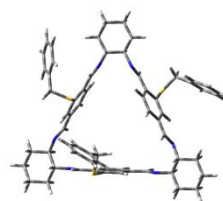

conf. 66

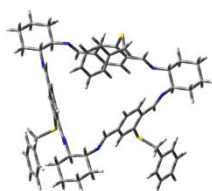

conf. 69

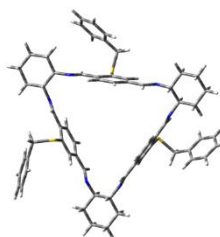

conf. 72

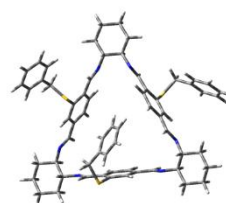

conf. 74

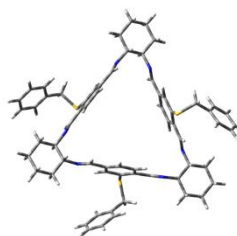

conf. 75

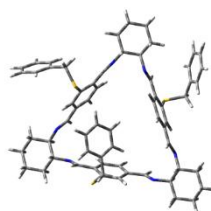

conf. 77

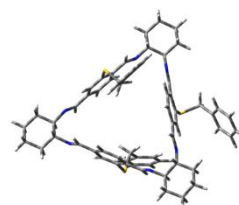

conf. 78

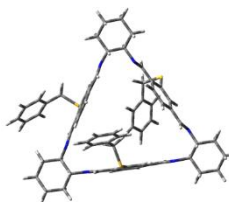

conf. 79

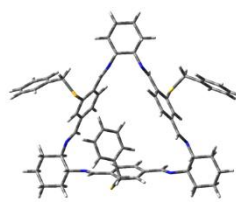

conf. 82

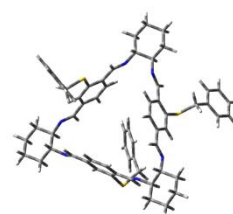

conf. 83

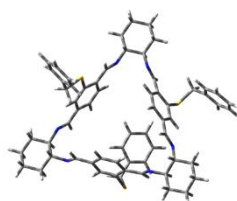

conf. 84

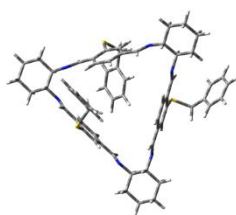

conf. 86

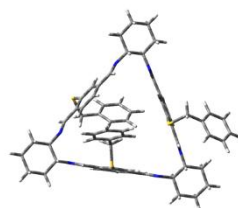

conf. 87

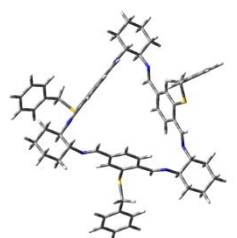

conf. 89

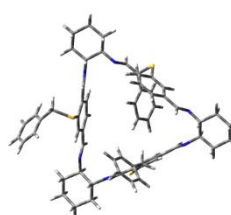

conf. 90

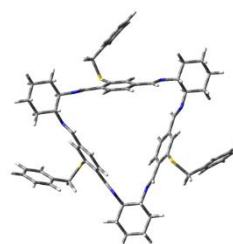

conf. 91

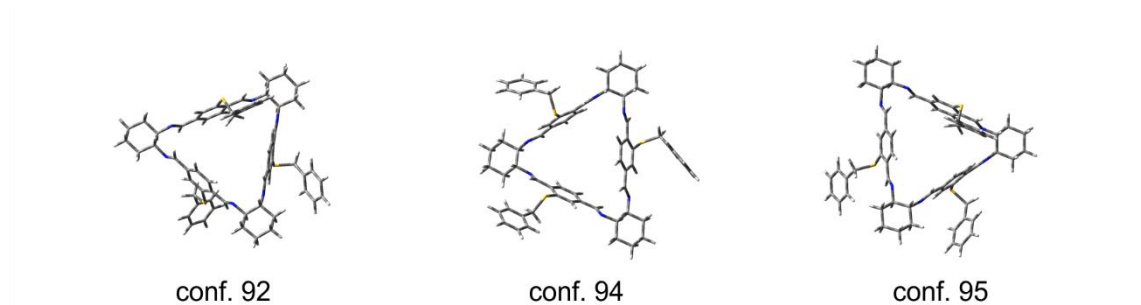

**Figure S99.** Structures of the low-energy conformers of **6h**, calculated at the B3LYP/6-311G(d,p) level. Prefix “sym” denotes symmetrical conformer.

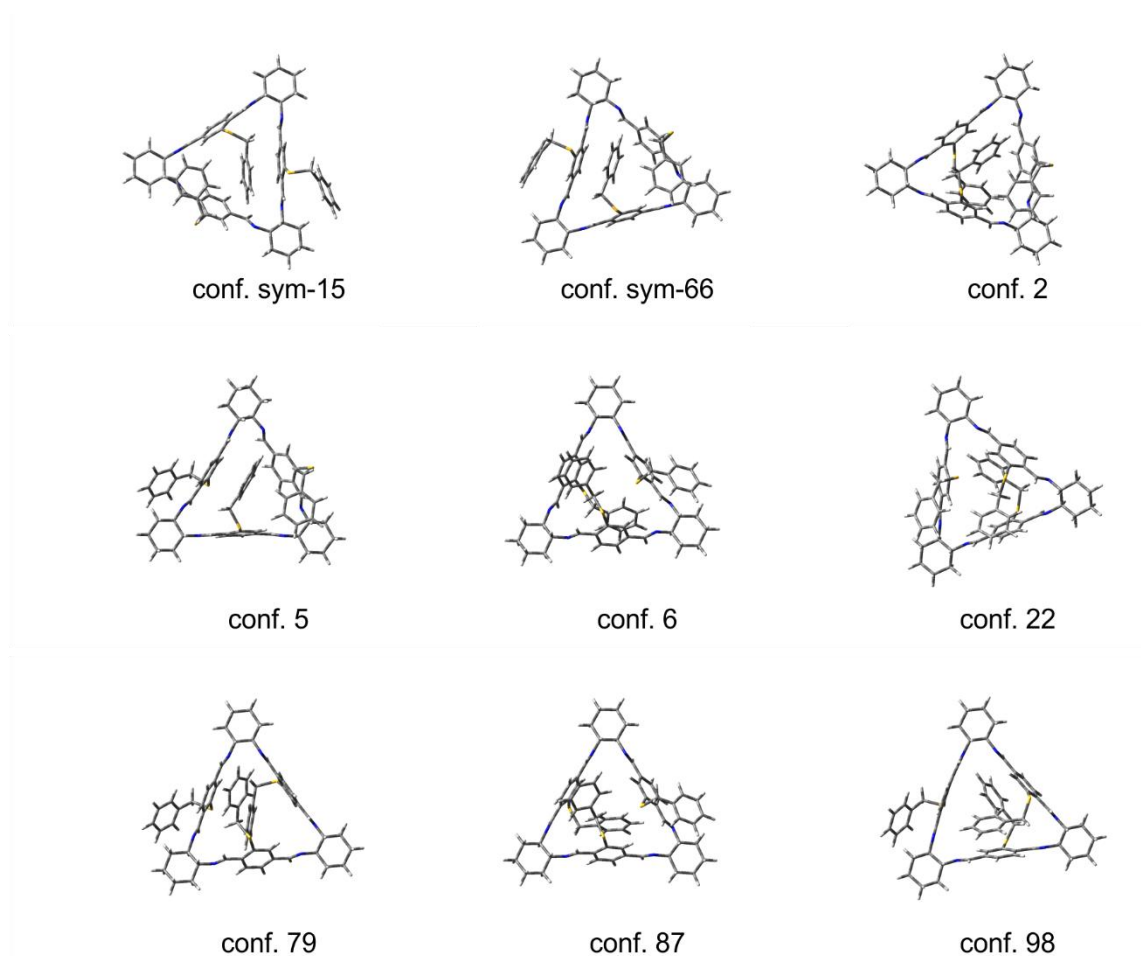

**Figure S100.** Structures of the low-energy conformers of **6h**, calculated at the B3LYP-GD3BJ/6-311G(d,p) level. Prefix “sym” denotes symmetrical conformer.

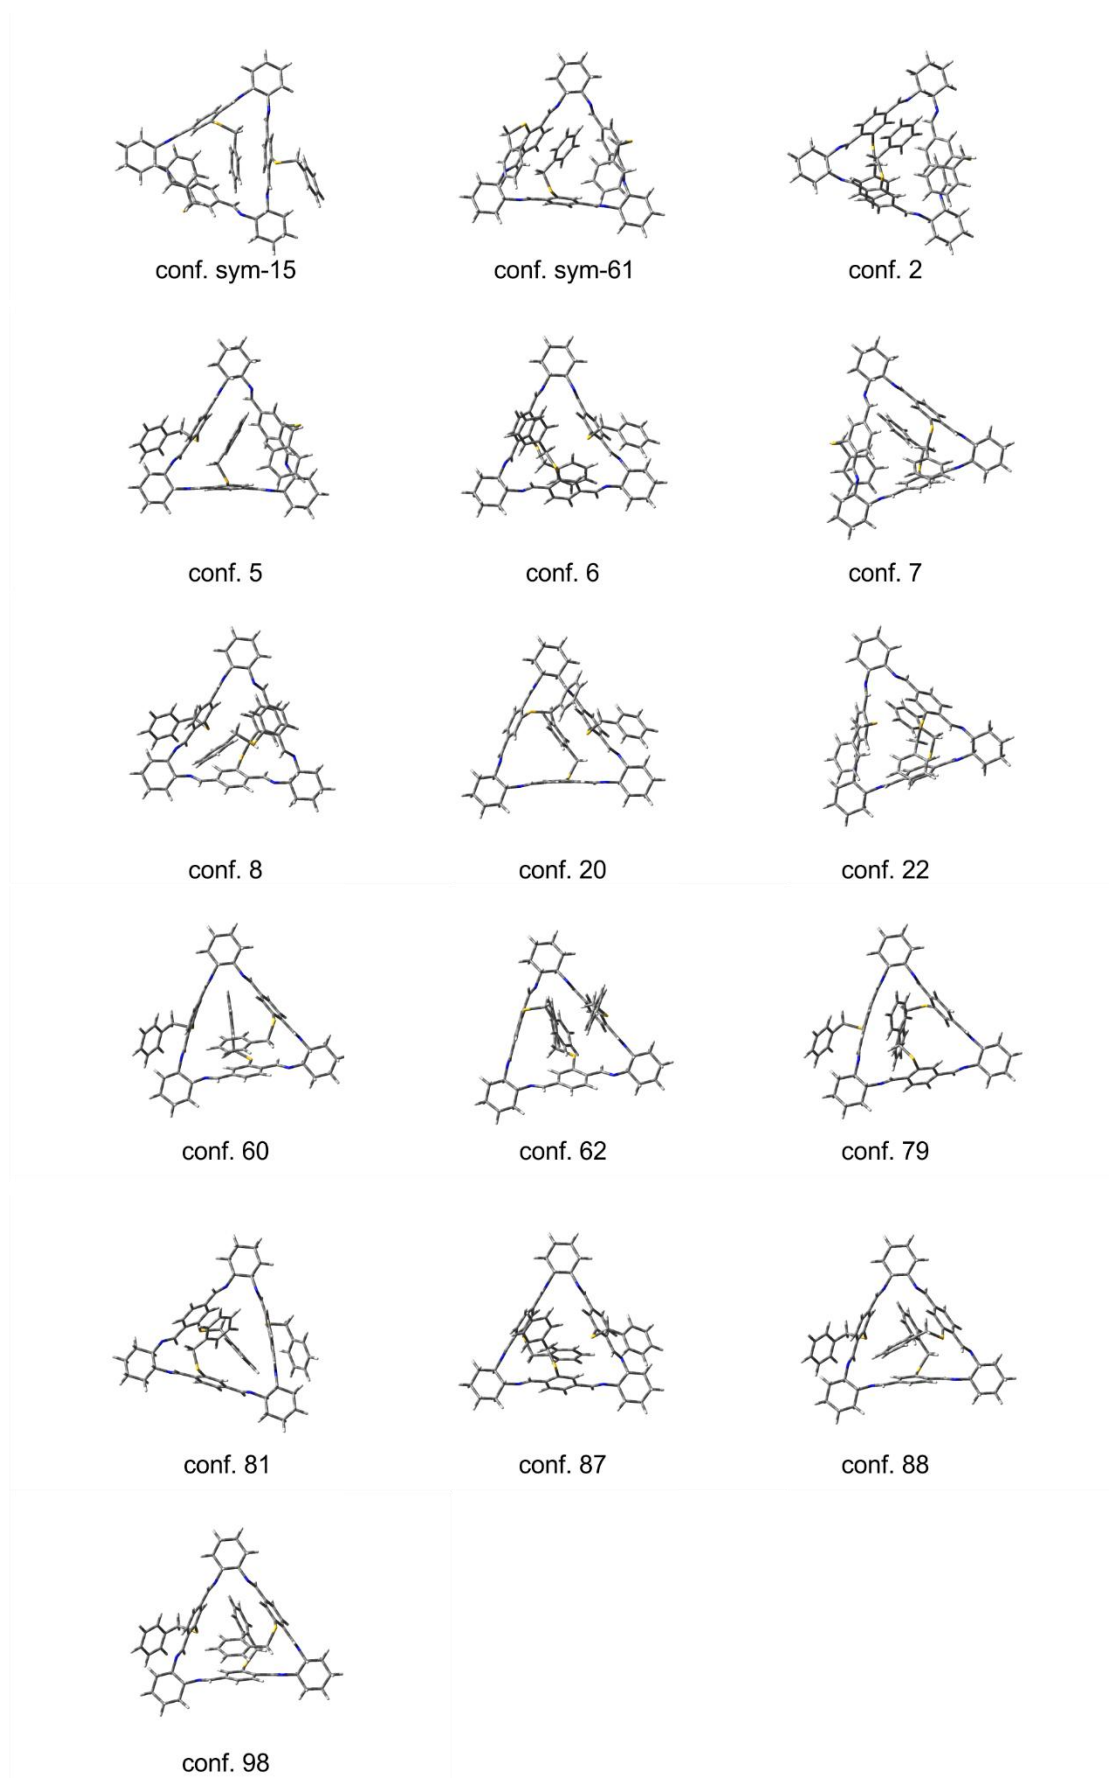

**Figure S101.** Structures of the low-energy conformers of **6h**, calculated at the M06L/6-311G(d,p) level. Prefix “sym” denotes symmetrical conformer.



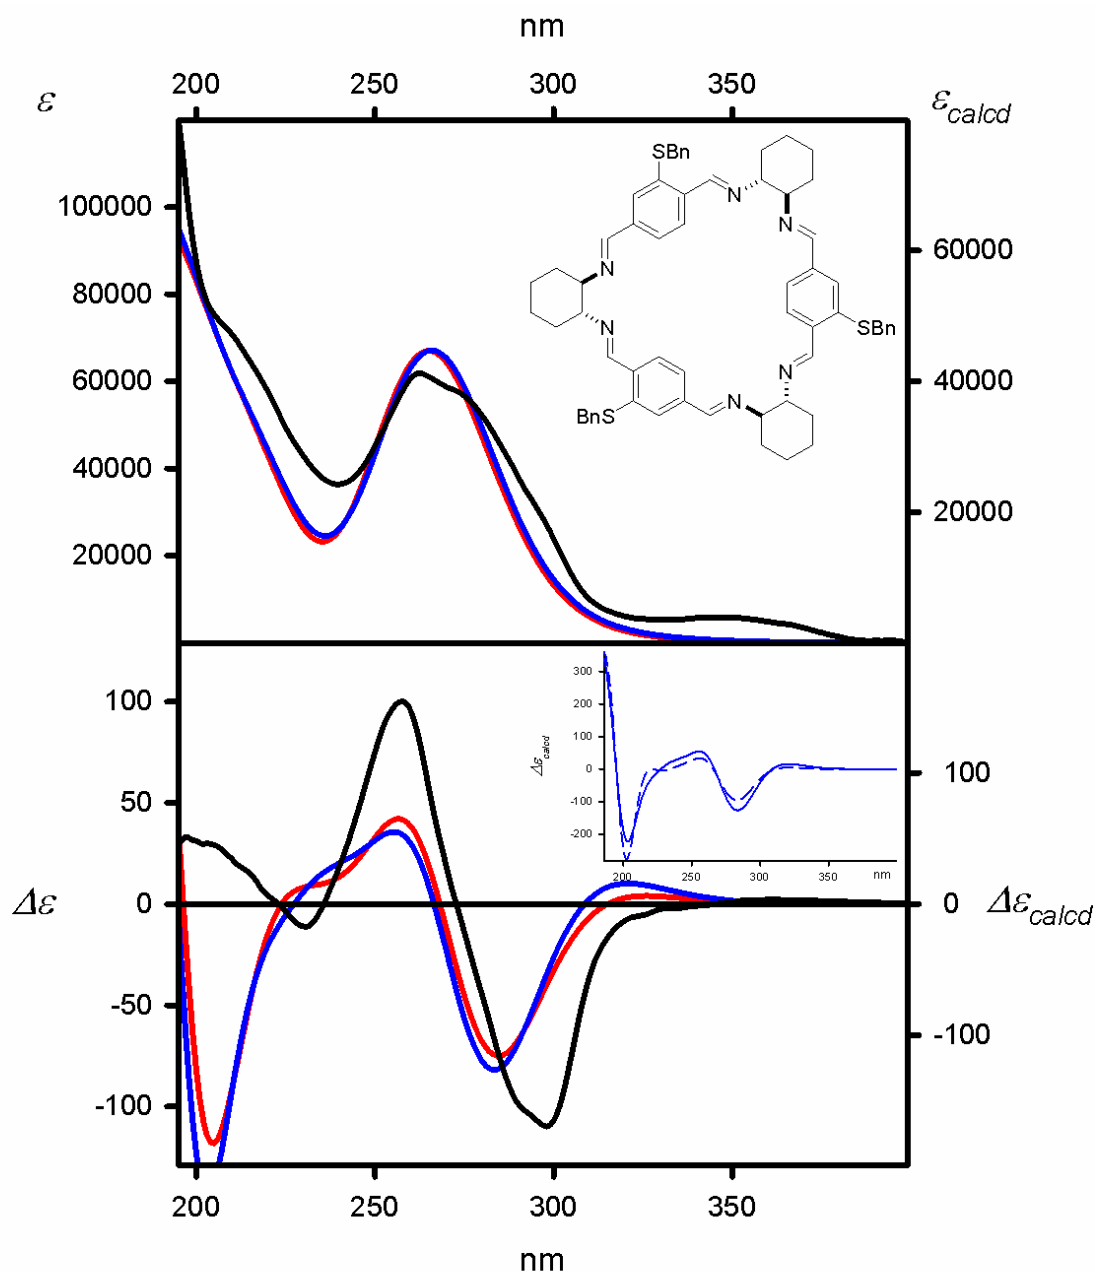

Experimental (cyclohexane, black lines)

Calculated at the  
 TD-CAM-B3LYP/6-311G(d,p) level and:  
 $\Delta E$ -based Boltzmann averaged (red lines)  
 $\Delta\Delta G$ -based Boltzmann averaged (blue lines)  
 Geometry optimized at the  
 B3LYP/6-311G(d,p) level

**Figure S102.** UV (upper panel) and ECD (lower panel) spectra of **6h** measured in cyclohexane (solid black lines) and calculated at the TD-CAM-B3LYP/6-311G(d,p) level for geometries optimized at the B3LYP/6-311G(d,p) level. The calculated ECD spectra were Boltzmann-averaged based on  $\Delta E$  (red lines) and  $\Delta\Delta G$  values (blue lines). Wavelengths were corrected to match the experimental UV maxima. The insert shows the comparison between the ECD spectra calculated for the lowest energy conformer of a given compound (dashed blue lines) and the  $\Delta\Delta G$ -based and Boltzmann averaged (solid blue lines).

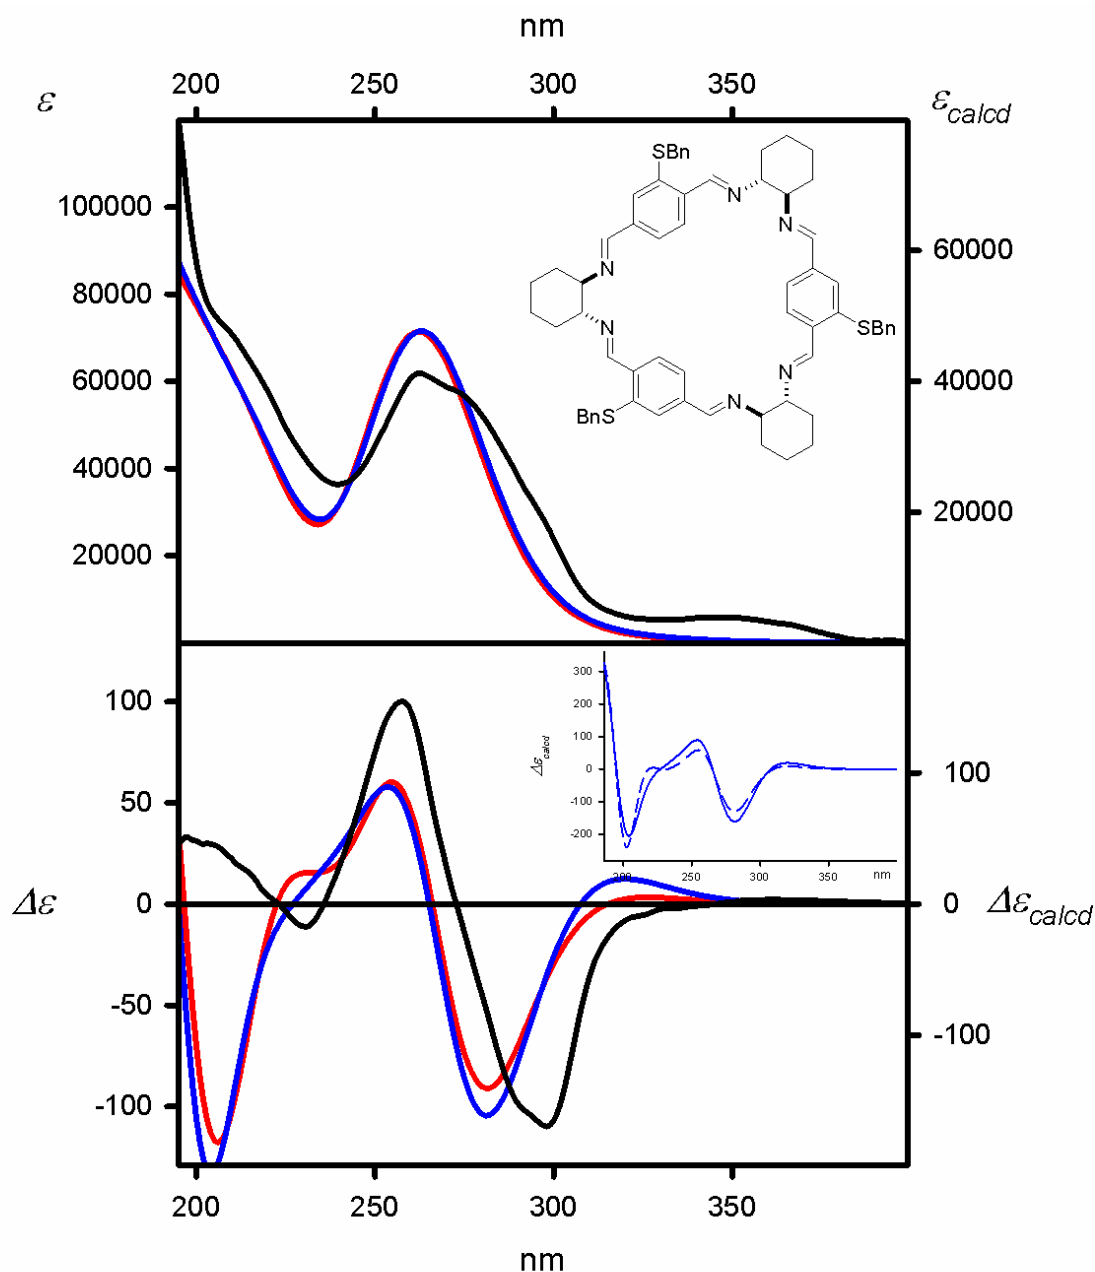

Experimental (cyclohexane, black lines)

Calculated at the  
TD-M06-2X/6-311G(d,p) level and:

$\Delta E$ -based Boltzmann averaged (red lines)

$\Delta \Delta G$ -based Boltzmann averaged (blue lines)

Geometry optimized at the  
B3LYP/6-311G(d,p) level

**Figure S103.** UV (upper panel) and ECD (lower panel) spectra of **6h** measured in cyclohexane (solid black lines) and calculated at the TD-M06-2X/6-311G(d,p) level for geometries optimized at the B3LYP/6-311G(d,p) level. The calculated ECD spectra were Boltzmann-averaged based on  $\Delta E$  (red lines) and  $\Delta \Delta G$  values (blue lines). Wavelengths were corrected to match the experimental UV maxima. The insert shows the comparison between the ECD spectra calculated for the lowest energy conformer of a given compound (dashed blue lines) and the  $\Delta \Delta G$ -based and Boltzmann averaged (solid blue lines).

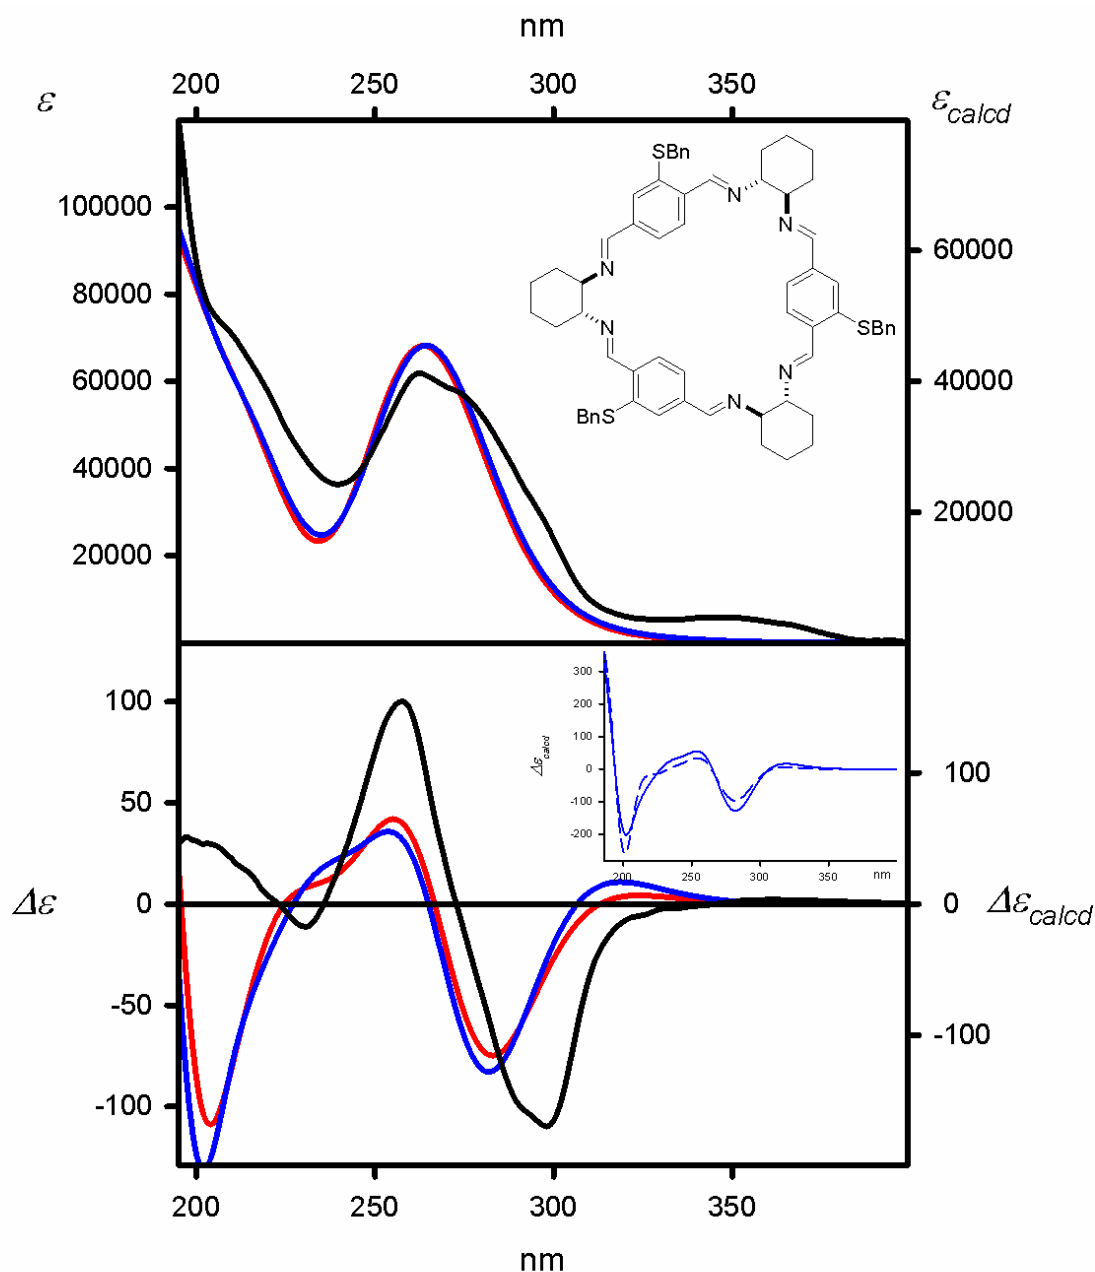

Experimental (cyclohexane, black lines)

Calculated at the  
 TD-wB97XD/6-311G(d,p) level and:  
 $\Delta E$ -based Boltzmann averaged (red lines)  
 $\Delta\Delta G$ -based Boltzmann averaged (blue lines)  
 Geometry optimized at the  
 B3LYP/6-311G(d,p) level

**Figure S104.** UV (upper panel) and ECD (lower panel) spectra of **6h** measured in cyclohexane (solid black lines) and calculated at the TD-wB97XD/6-311G(d,p) level for geometries optimized at the B3LYP/6-311G(d,p) level. The calculated ECD spectra were Boltzmann-averaged based on  $\Delta E$  (red lines) and  $\Delta\Delta G$  values (blue lines). Wavelengths were corrected to match the experimental UV maxima. The insert shows the comparison between the ECD spectra calculated for the lowest energy conformer of a given compound (dashed blue lines) and the  $\Delta\Delta G$ -based and Boltzmann averaged (solid blue lines).

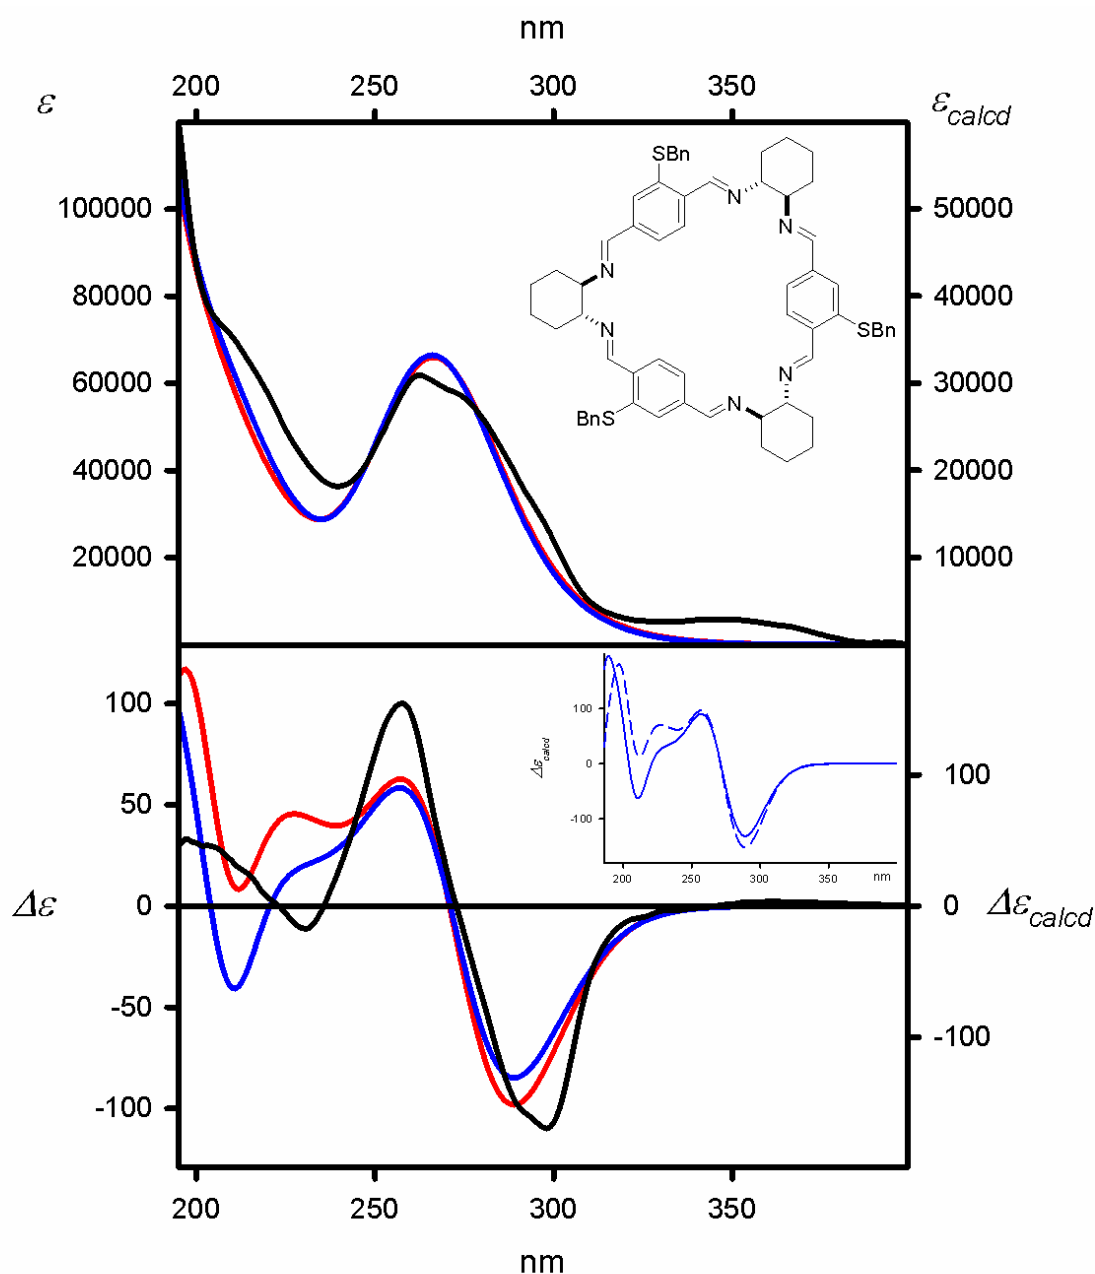

Experimental (cyclohexane, black lines)

Calculated at the  
 TD-CAM-B3LYP/6-311G(d,p) level and:  
 $\Delta E$ -based Boltzmann averaged (red lines)  
 $\Delta\Delta G$ -based Boltzmann averaged (blue lines)  
 Geometry optimized at the  
 B3LYP-GD3BJ/6-311G(d,p) level

**Figure S105.** UV (upper panel) and ECD (lower panel) spectra of **6h** measured in cyclohexane (solid black lines) and calculated at the TD-CAM-B3LYP/6-311G(d,p) level for geometries optimized at the B3LYP-GD3BJ/6-311G(d,p) level. The calculated ECD spectra were Boltzmann-averaged based on  $\Delta E$  (red lines) and  $\Delta\Delta G$  values (blue lines). Wavelengths were corrected to match the experimental UV maxima. The insert shows the comparison between the ECD spectra calculated for the lowest energy conformer of a given compound (dashed blue lines) and the  $\Delta\Delta G$ -based and Boltzmann averaged (solid blue lines).

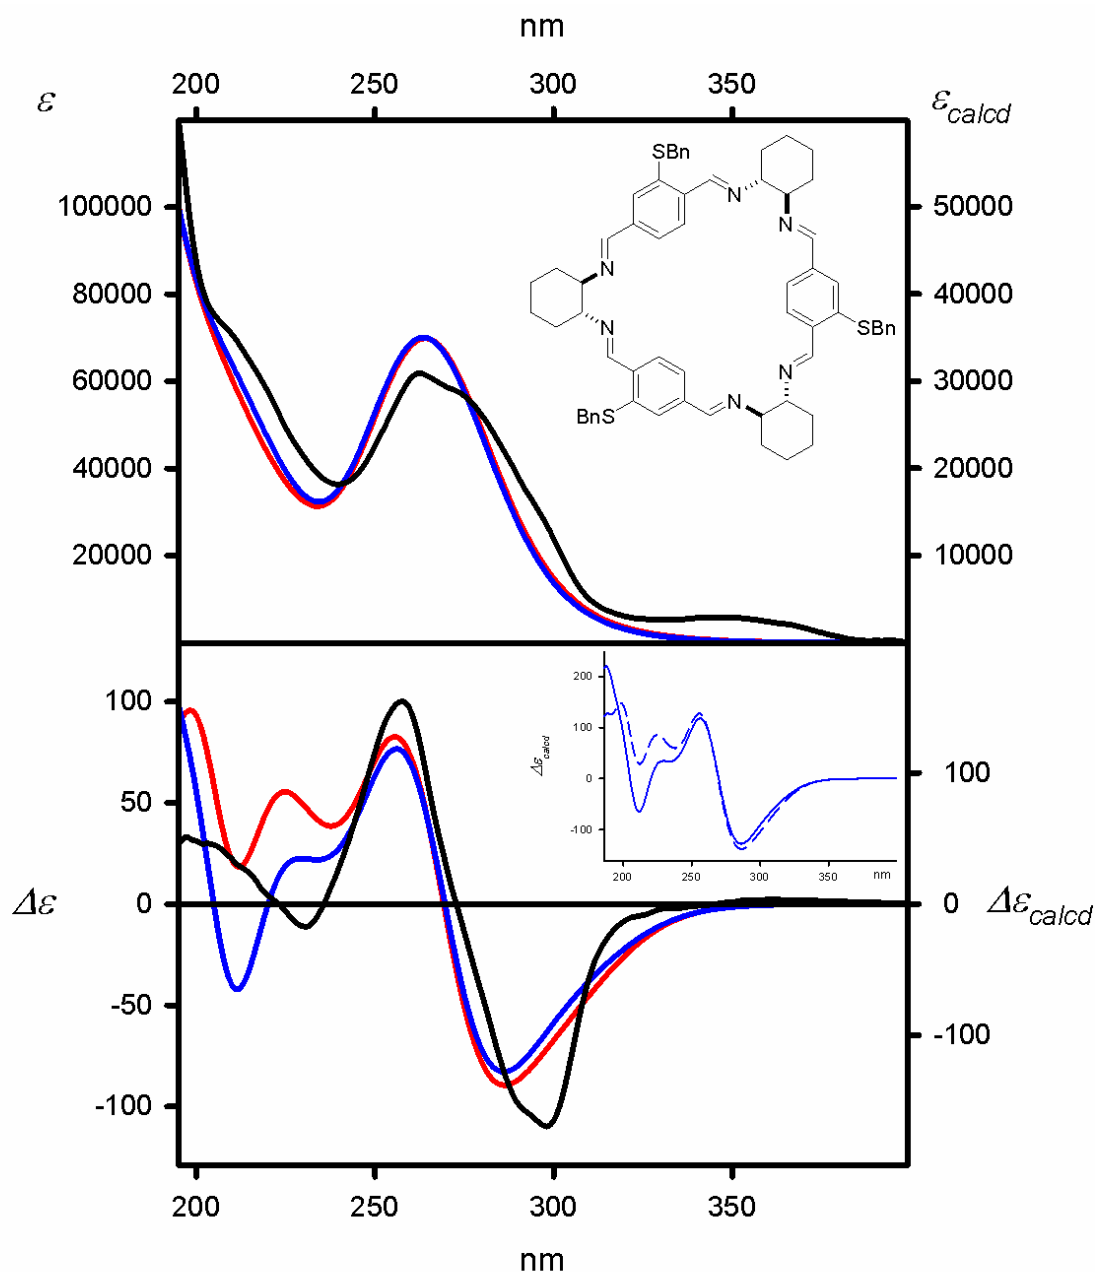

Experimental (cyclohexane, black lines)

Calculated at the  
TD-M06-2X/6-311G(d,p) level and:

$\Delta E$ -based Boltzmann averaged (red lines)

$\Delta\Delta G$ -based Boltzmann averaged (blue lines)

Geometry optimized at the  
B3LYP-GD3BJ/6-311G(d,p) level

**Figure S106.** UV (upper panel) and ECD (lower panel) spectra of **6h** measured in cyclohexane (solid black lines) and calculated at the TD-M06-2X/6-311G(d,p) level for geometries optimized at the B3LYP-GD3BJ/6-311G(d,p) level. The calculated ECD spectra were Boltzmann-averaged based on  $\Delta E$  (red lines) and  $\Delta\Delta G$  values (blue lines). Wavelengths were corrected to match the experimental UV maxima. The insert shows the comparison between the ECD spectra calculated for the lowest energy conformer of a given compound (dashed blue lines) and the  $\Delta\Delta G$ -based and Boltzmann averaged (solid blue lines).



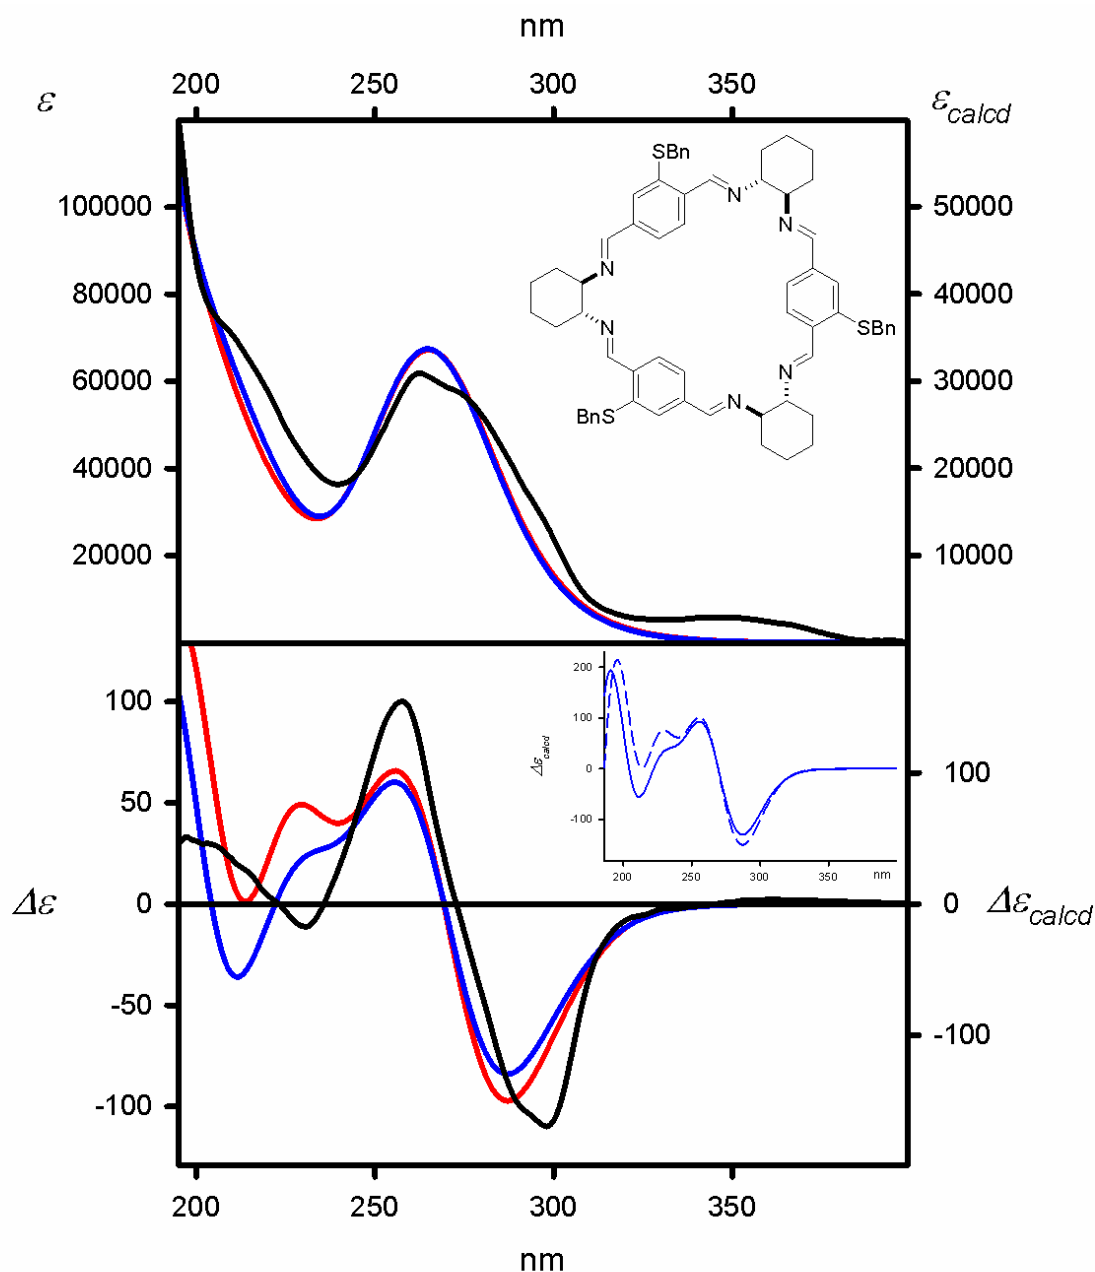

Experimental (cyclohexane, black lines)

Calculated at the  
 TD-wB97XD/6-311G(d,p) level and:  
 $\Delta E$ -based Boltzmann averaged (red lines)  
 $\Delta\Delta G$ -based Boltzmann averaged (blue lines)  
 Geometry optimized at the  
 B3LYP-GD3BJ/6-311G(d,p) level

**Figure S107.** UV (upper panel) and ECD (lower panel) spectra of **6h** measured in cyclohexane (solid black lines) and calculated at the TD-wB97XD/6-311G(d,p) level for geometries optimized at the B3LYP-GD3BJ/6-311G(d,p) level. The calculated ECD spectra were Boltzmann-averaged based on  $\Delta E$  (red lines) and  $\Delta\Delta G$  values (blue lines). Wavelengths were corrected to match the experimental UV maxima. The insert shows the comparison between the ECD spectra calculated for the lowest energy conformer of a given compound (dashed blue lines) and the  $\Delta\Delta G$ -based and Boltzmann averaged (solid blue lines).

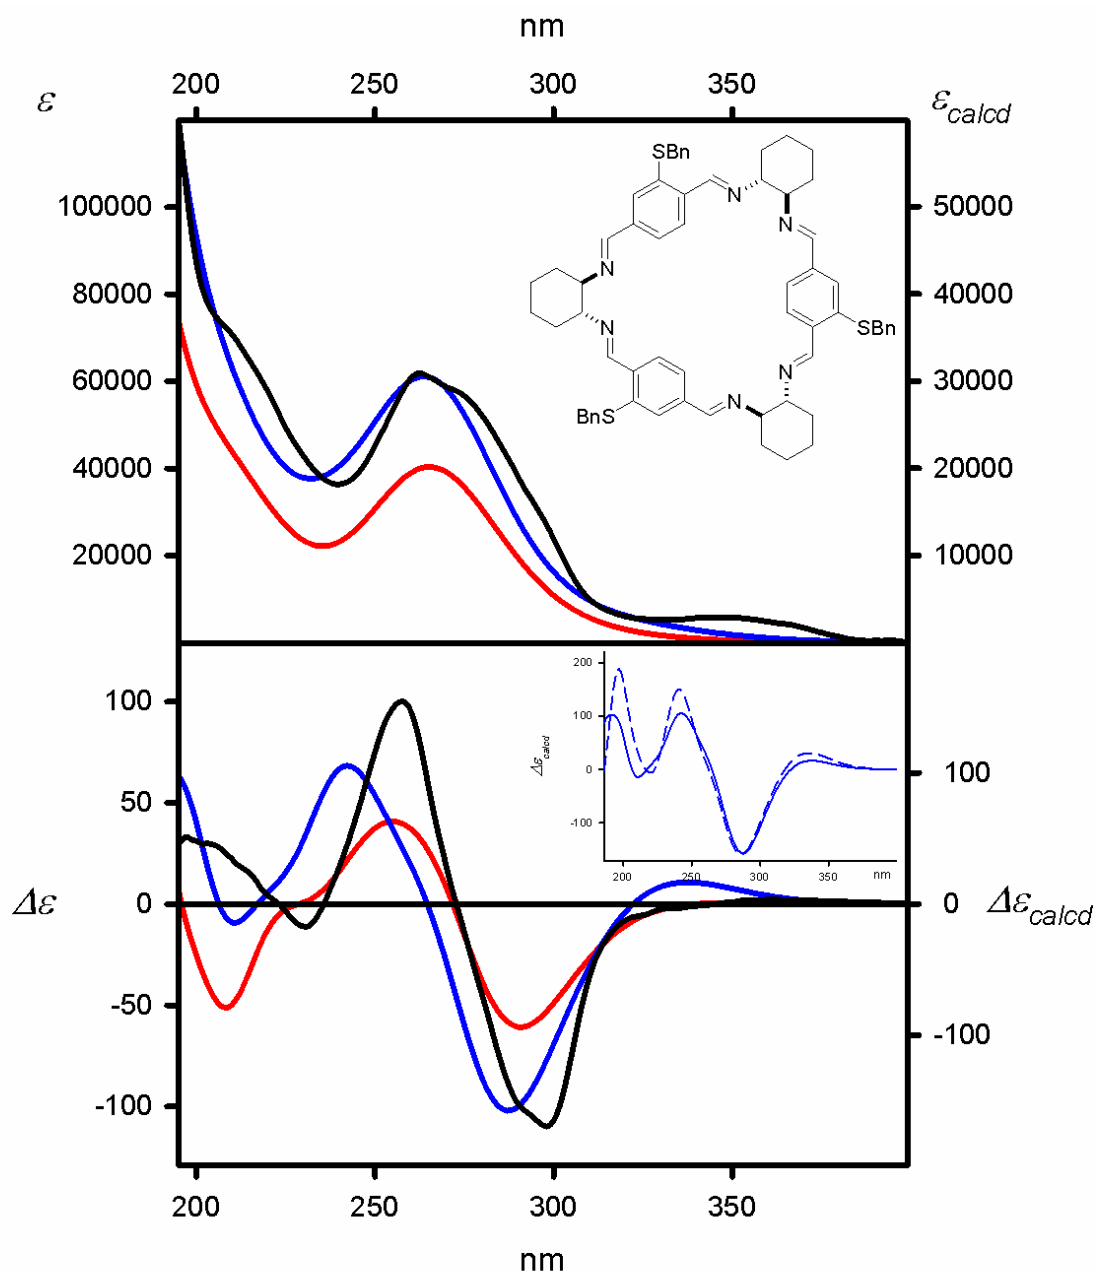

Experimental (cyclohexane, black lines)

Calculated at the  
 TD-CAM-B3LYP/6-311G(d,p) level and:  
 $\Delta E$ -based Boltzmann averaged (red lines)  
 $\Delta\Delta G$ -based Boltzmann averaged (blue lines)  
 Geometry optimized at the  
 M06L/6-311G(d,p) level

**Figure S108.** UV (upper panel) and ECD (lower panel) spectra of **6h** measured in cyclohexane (solid black lines) and calculated at the TD-CAM-B3LYP/6-311G(d,p) level for geometries optimized at the M06L/6-311G(d,p) level. The calculated ECD spectra were Boltzmann-averaged based on  $\Delta E$  (red lines) and  $\Delta\Delta G$  values (blue lines). Wavelengths were corrected to match the experimental UV maxima. The insert shows the comparison between the ECD spectra calculated for the lowest energy conformer of a given compound (dashed blue lines) and the  $\Delta\Delta G$ -based and Boltzmann averaged (solid blue lines).

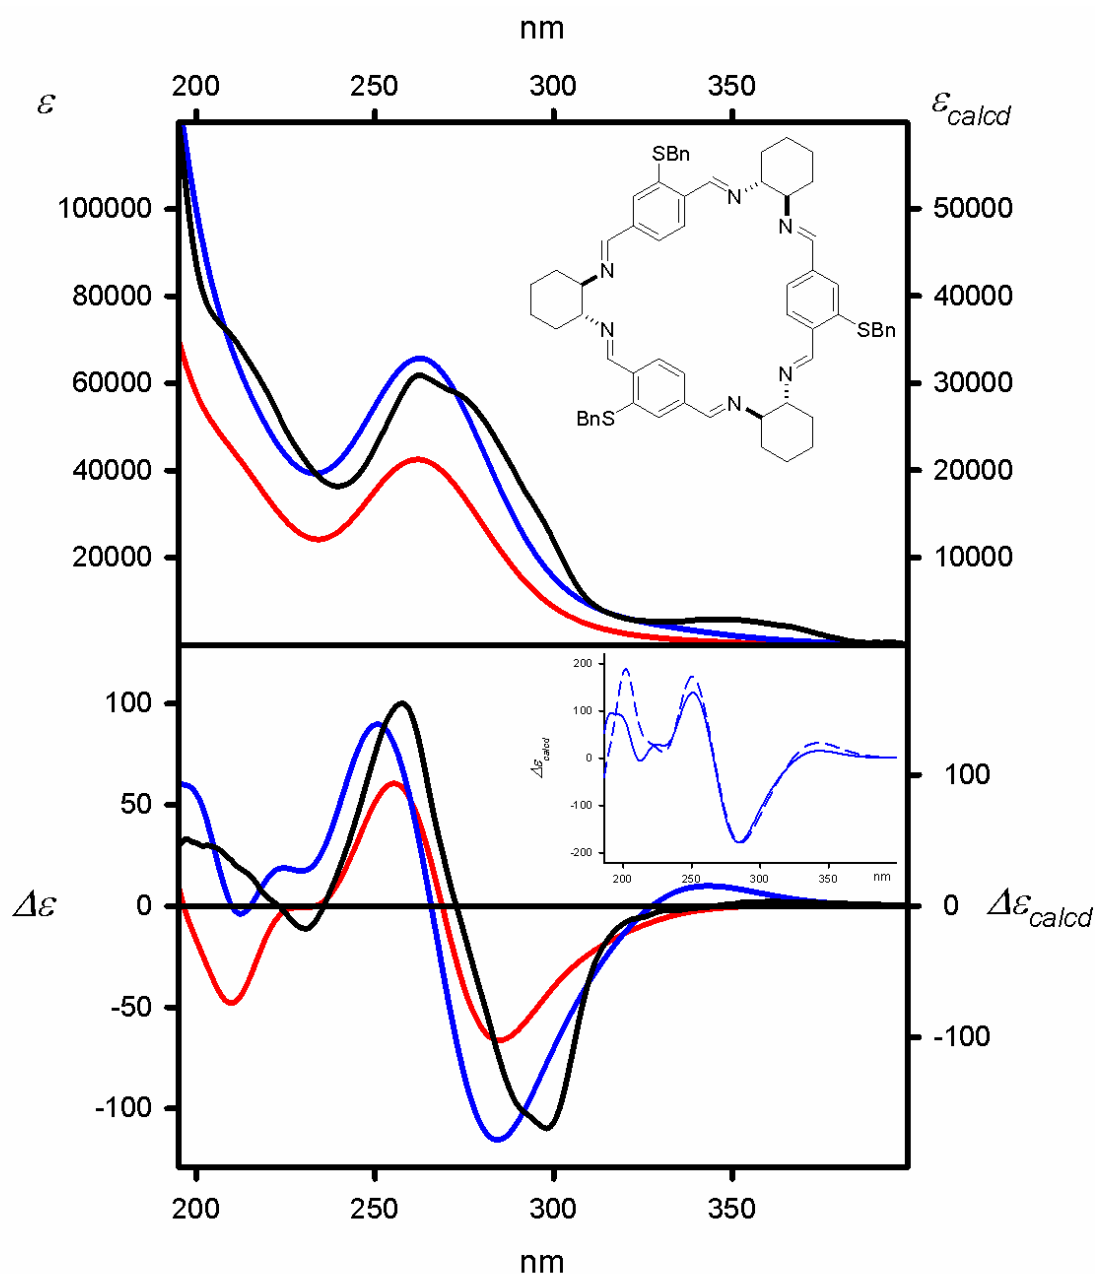

Experimental (cyclohexane, black lines)

Calculated at the  
TD-M06-2X/6-311G(d,p) level and:

$\Delta E$ -based Boltzmann averaged (red lines)

$\Delta\Delta G$ -based Boltzmann averaged (blue lines)

Geometry optimized at the  
M06L/6-311G(d,p) level

**Figure S109.** UV (upper panel) and ECD (lower panel) spectra of **6h** measured in cyclohexane (solid black lines) and calculated at the TD-M06-2X/6-311G(d,p) level for geometries optimized at the M06L/6-311G(d,p) level. The calculated ECD spectra were Boltzmann-averaged based on  $\Delta E$  (red lines) and  $\Delta\Delta G$  values (blue lines). Wavelengths were corrected to match the experimental UV maxima. The insert shows the comparison between the ECD spectra calculated for the lowest energy conformer of a given compound (dashed blue lines) and the  $\Delta\Delta G$ -based and Boltzmann averaged (solid blue lines).

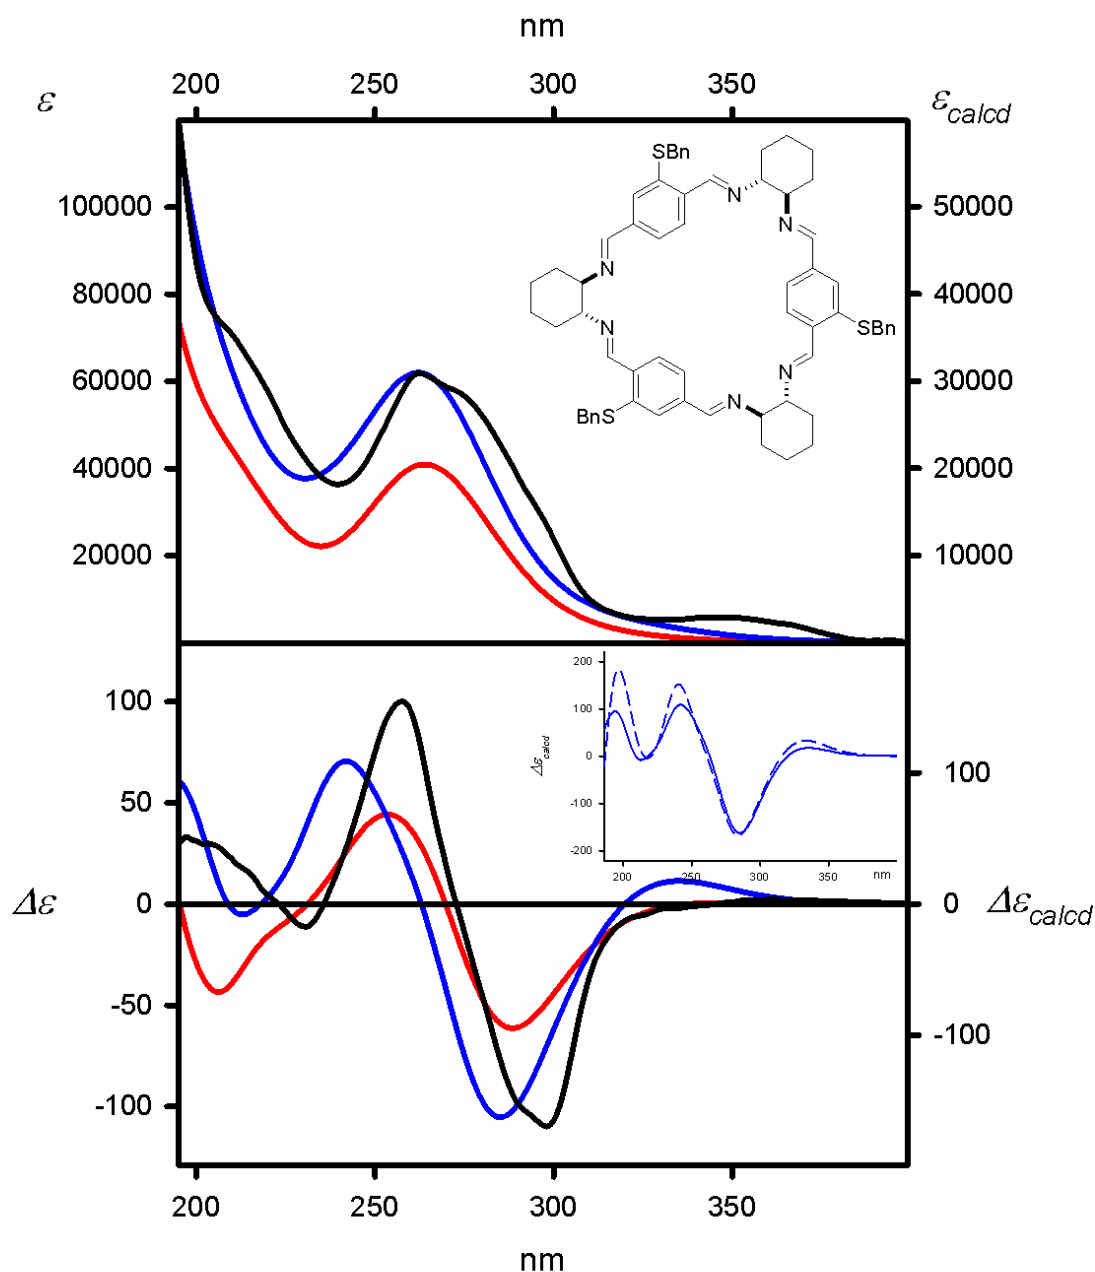

Experimental (cyclohexane, black lines)

Calculated at the  
 TD-wB97XD/6-311G(d,p) level and:  
 $\Delta E$ -based Boltzmann averaged (red lines)  
 $\Delta\Delta G$ -based Boltzmann averaged (blue lines)  
 Geometry optimized at the  
 M06L/6-311G(d,p) level

**Figure S110.** UV (upper panel) and ECD (lower panel) spectra of **6h** measured in cyclohexane (solid black lines) and calculated at the TD-wB97XD/6-311G(d,p) level for geometries optimized at the M06L/6-311G(d,p) level. The calculated ECD spectra were Boltzmann-averaged based on  $\Delta E$  (red lines) and  $\Delta\Delta G$  values (blue lines). Wavelengths were corrected to match the experimental UV maxima. The insert shows the comparison between the ECD spectra calculated for the lowest energy conformer of a given compound (dashed blue lines) and the  $\Delta\Delta G$ -based and Boltzmann averaged (solid blue lines).

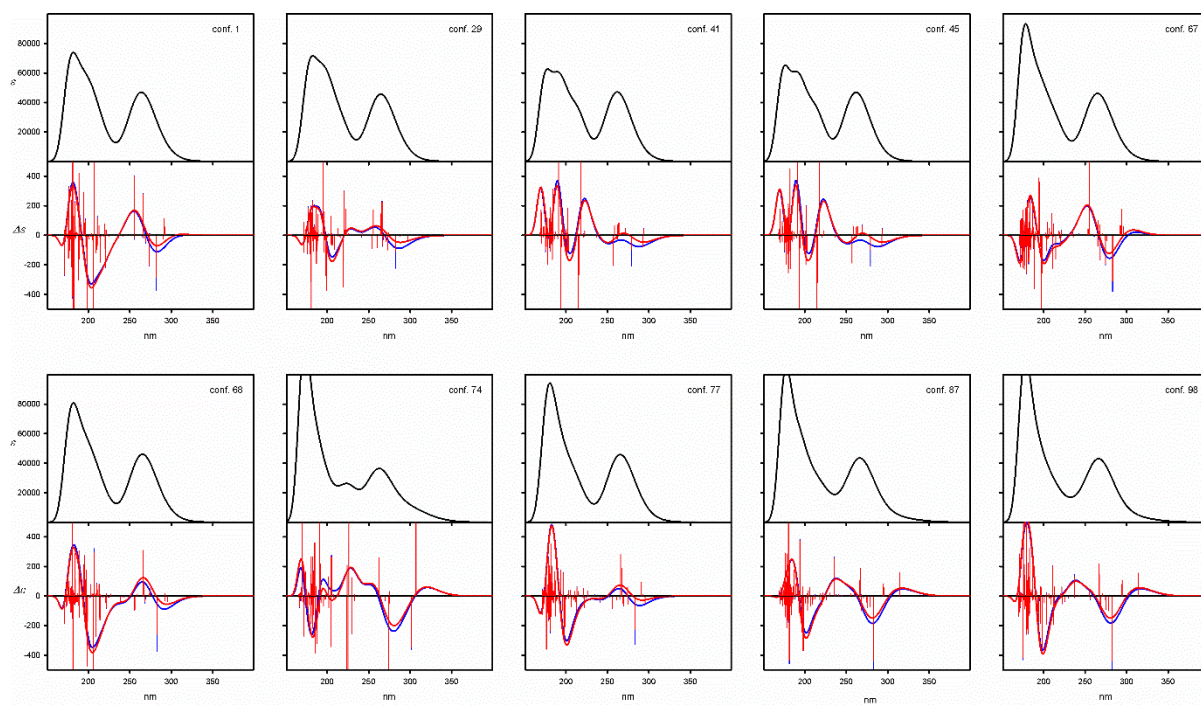

**Figure S111.** UV (upper panels) and ECD (lower panels) spectra calculated at the TD-CAM-B3LYP/6-311G(d,p) level for individual, symmetrical low-energy conformers of **6h**. Wavelengths were not corrected. Geometries were optimized at the B3LYP/6-311G(d,p) level.

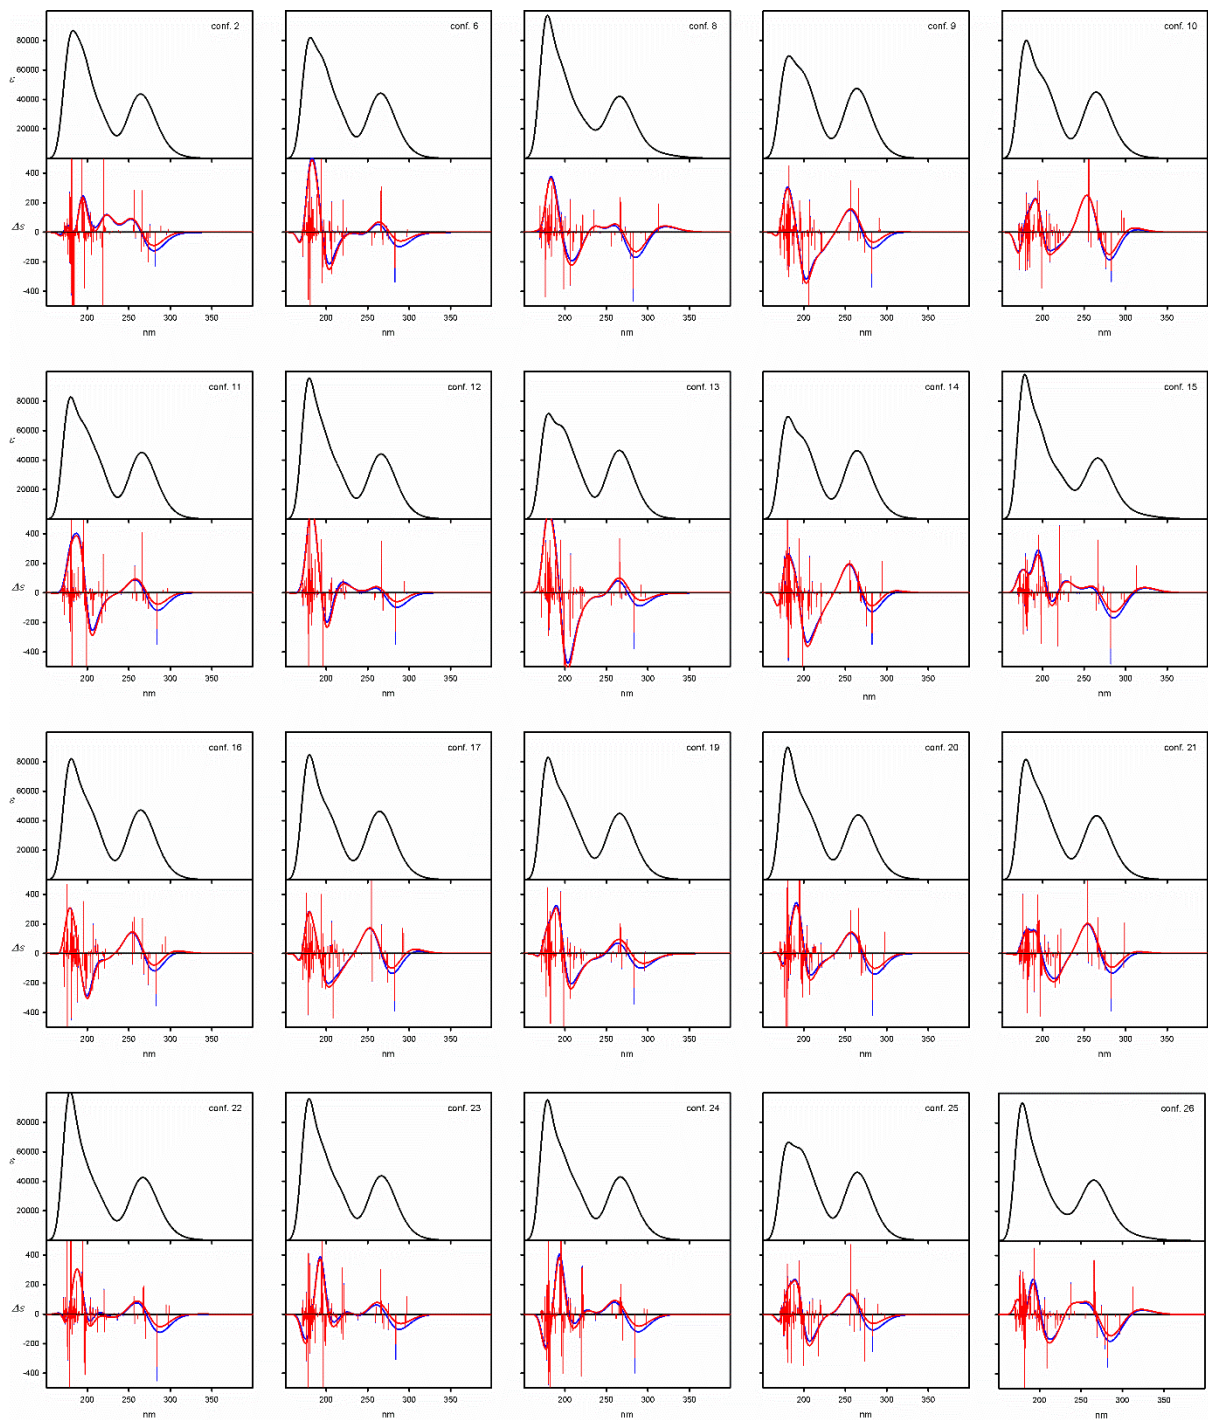



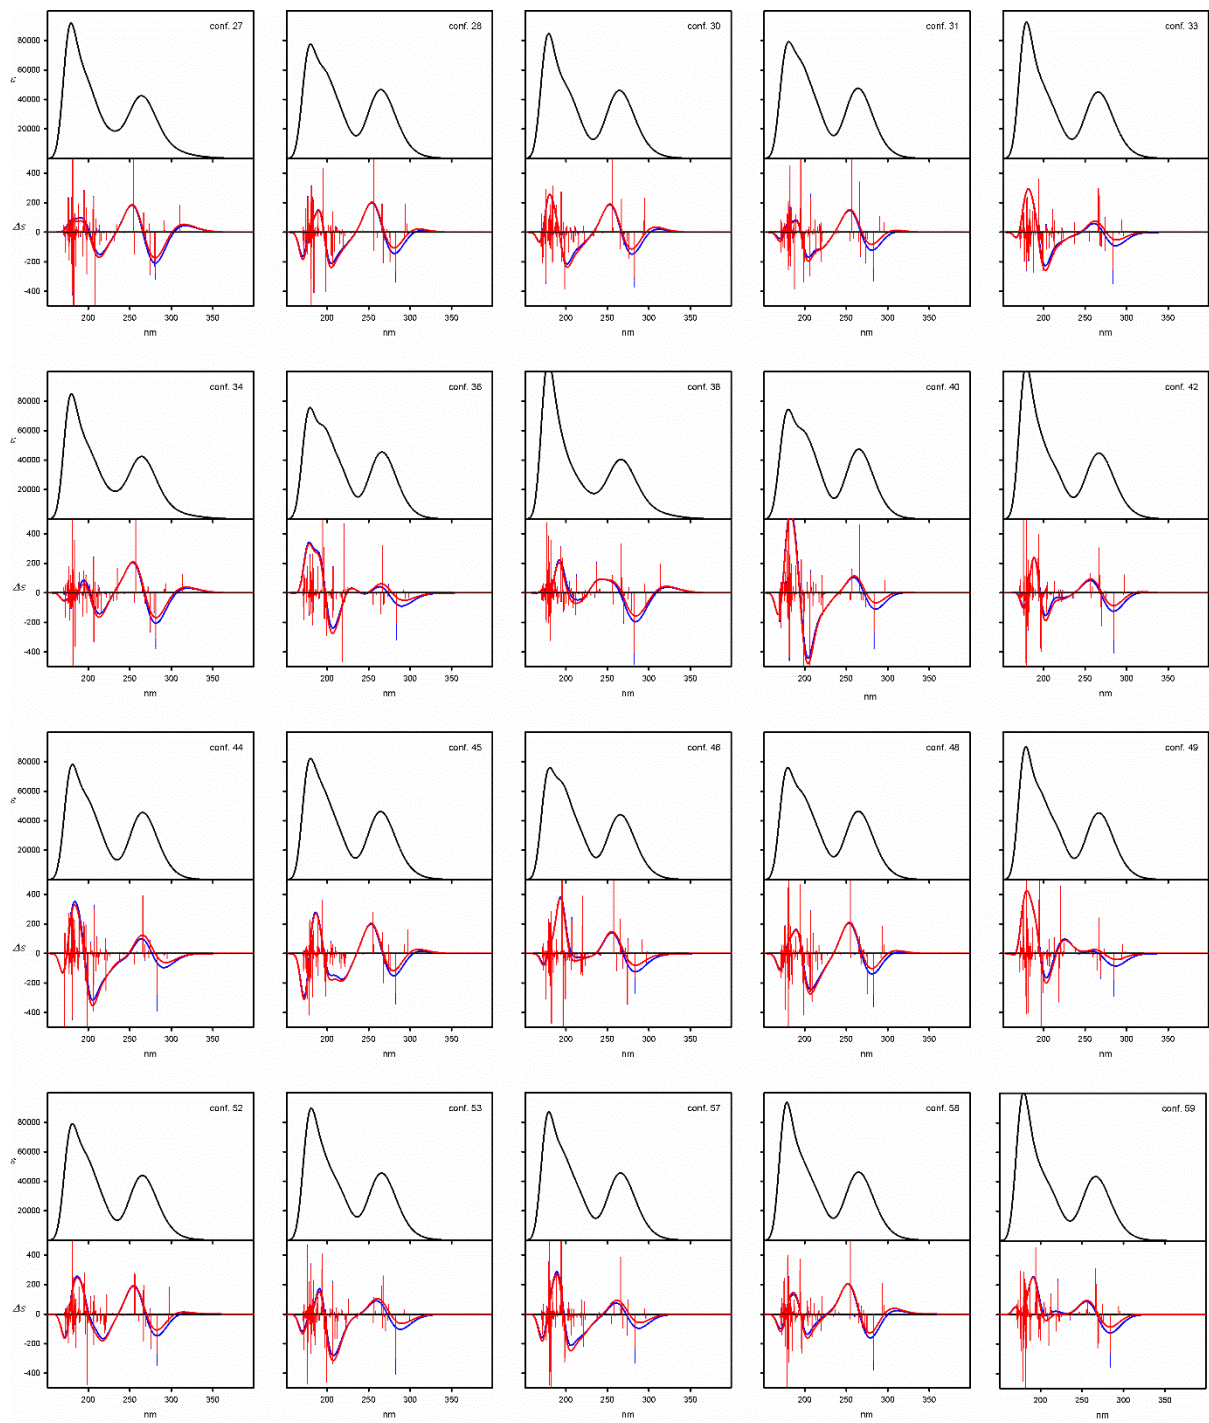

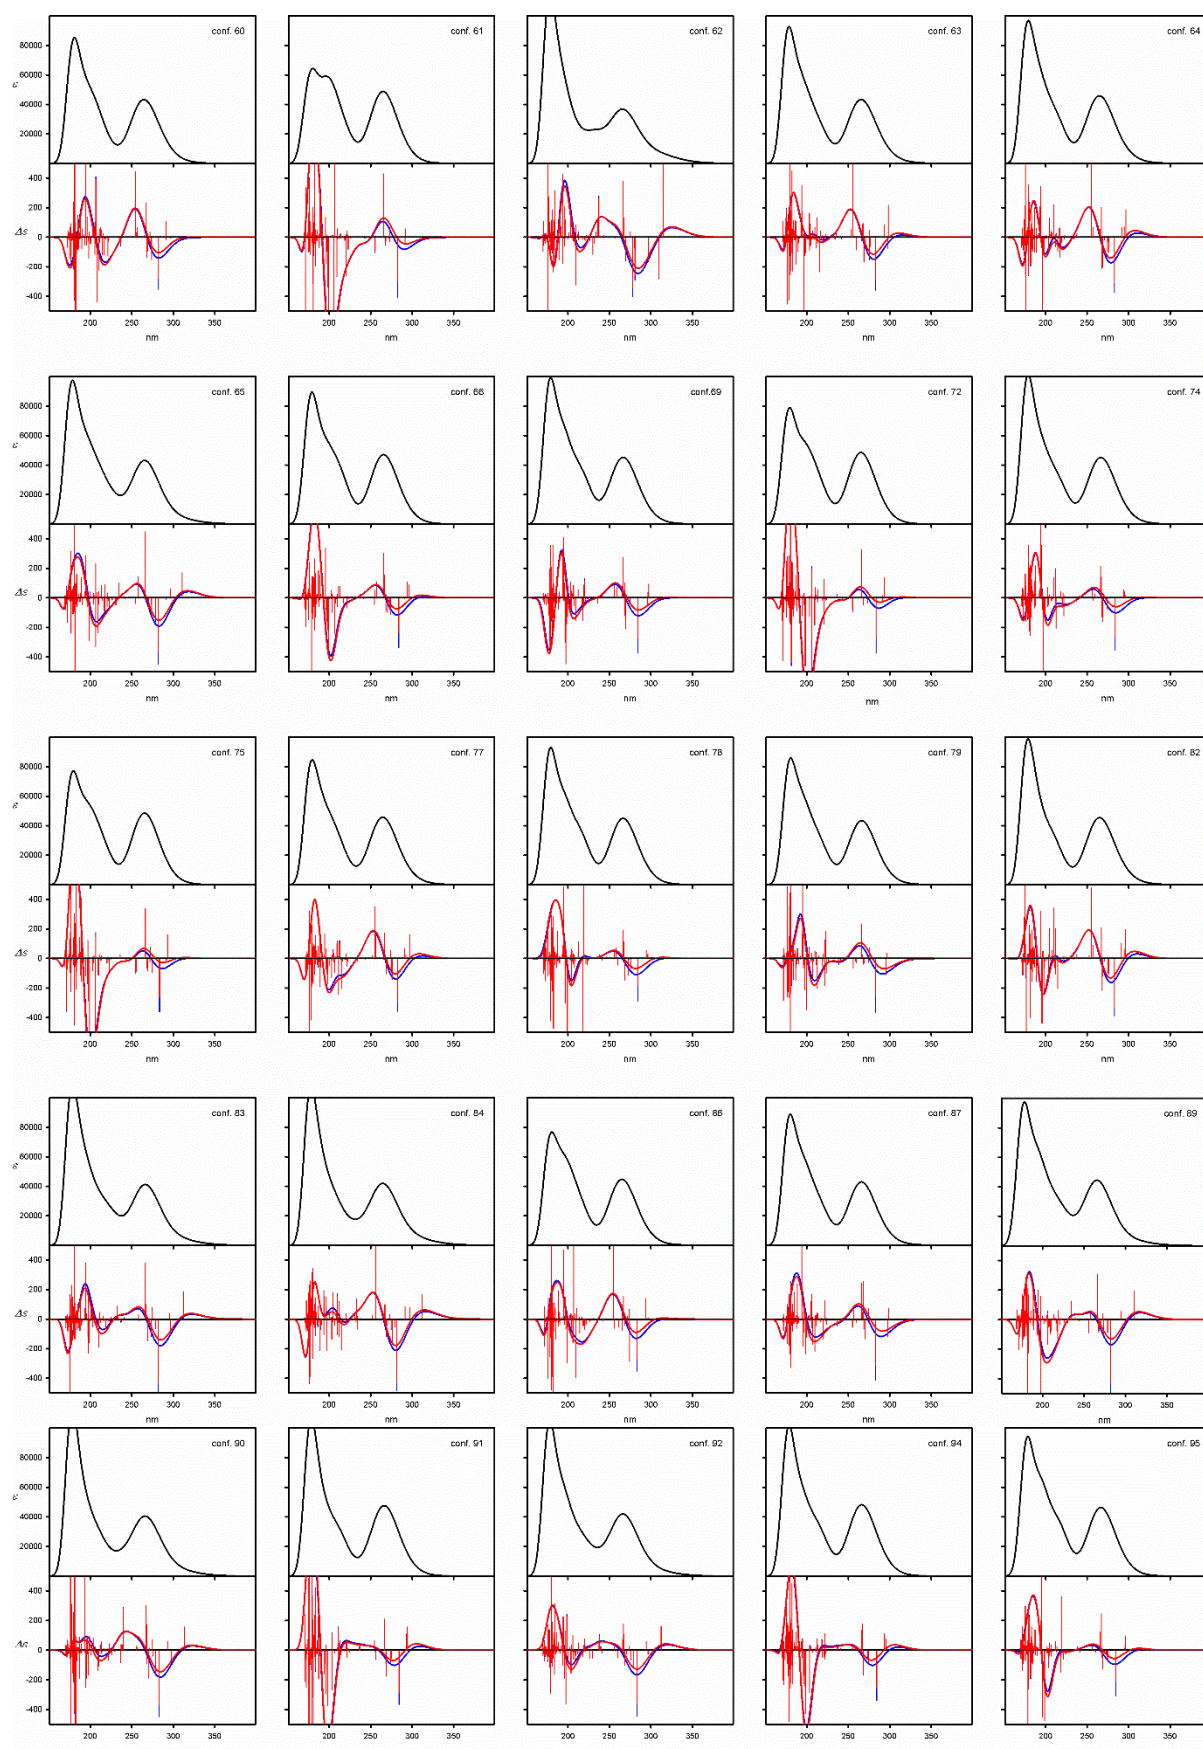

**Figure S112.** UV (upper panels) and ECD (lower panels) spectra calculated at the TD-CAM-B3LYP/6-311G(d,p) level for individual, non-symmetrical low-energy conformers of **6h**. Wavelengths were not corrected. Geometries were optimized at the B3LYP/6-311G(d,p) level.



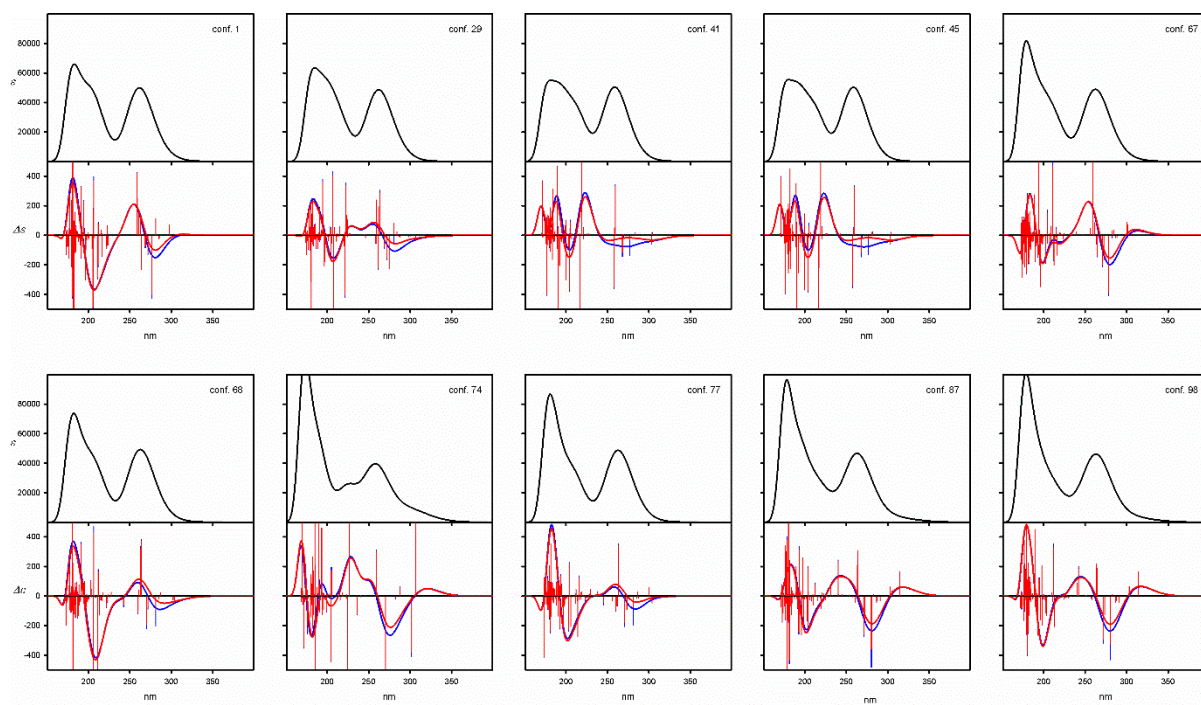

**Figure S113.** UV (upper panels) and ECD (lower panels) spectra calculated at the TD-M06-2X/6-311G(d,p) level for individual, symmetrical low-energy conformers of **6h**. Wavelengths were not corrected. Geometries were optimized at the B3LYP/6-311G(d,p) level.

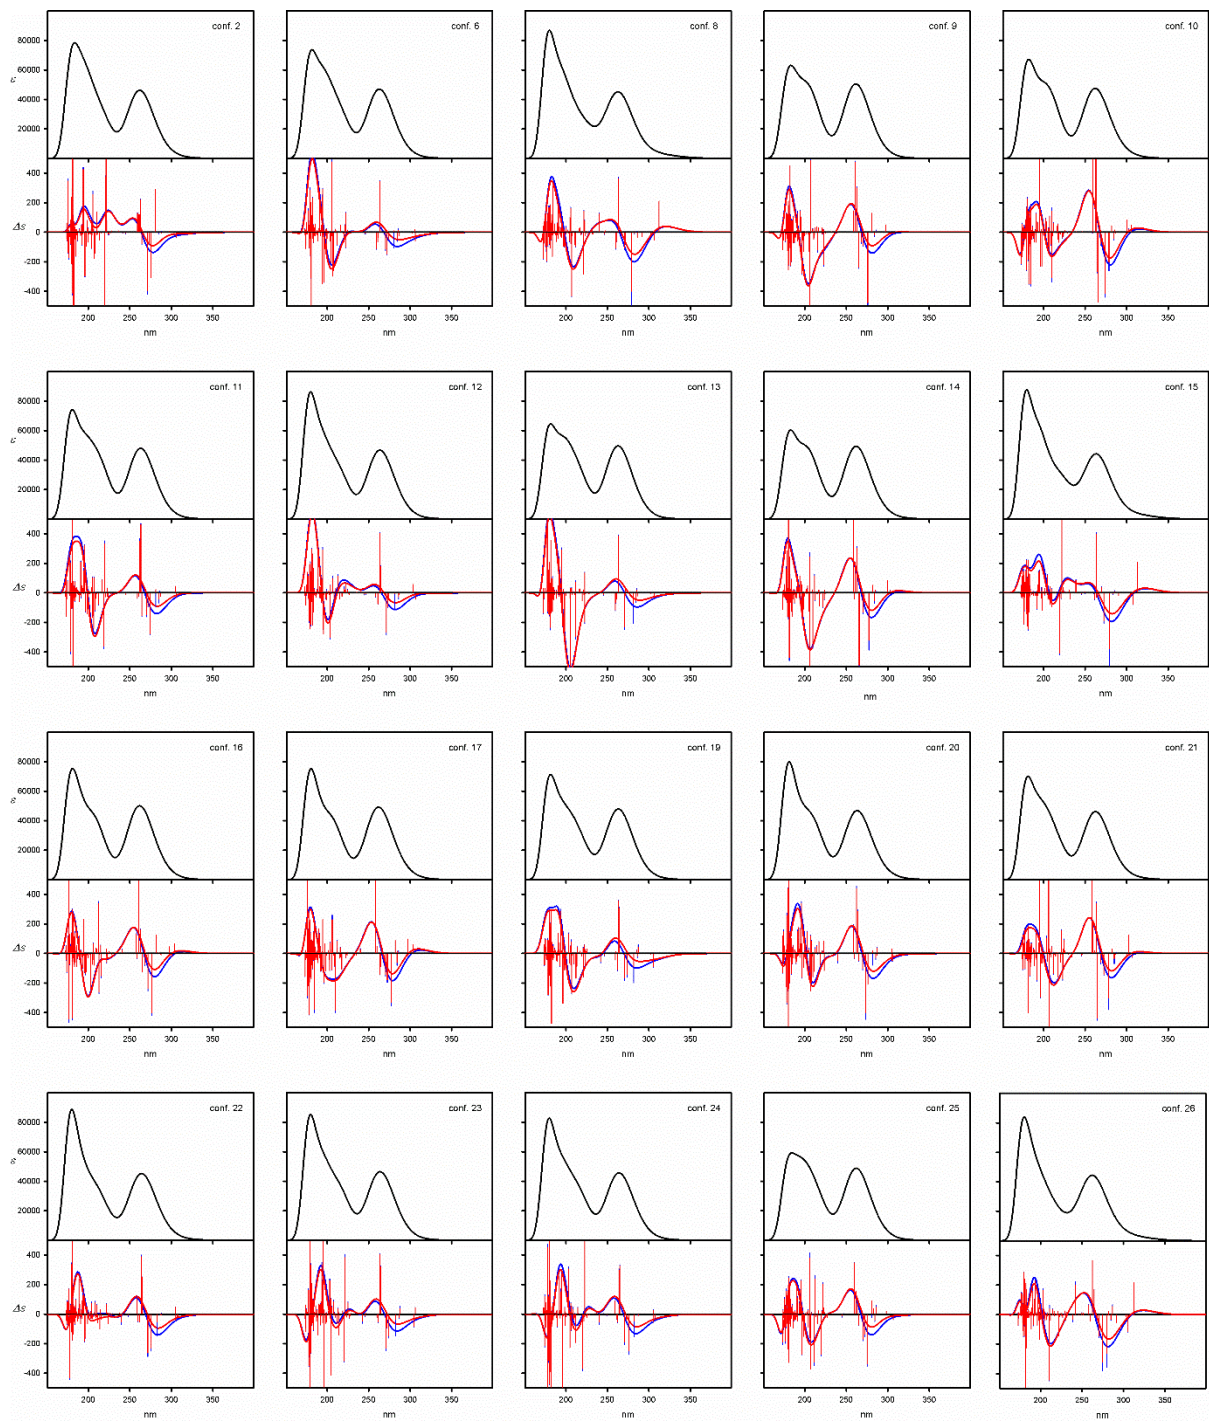

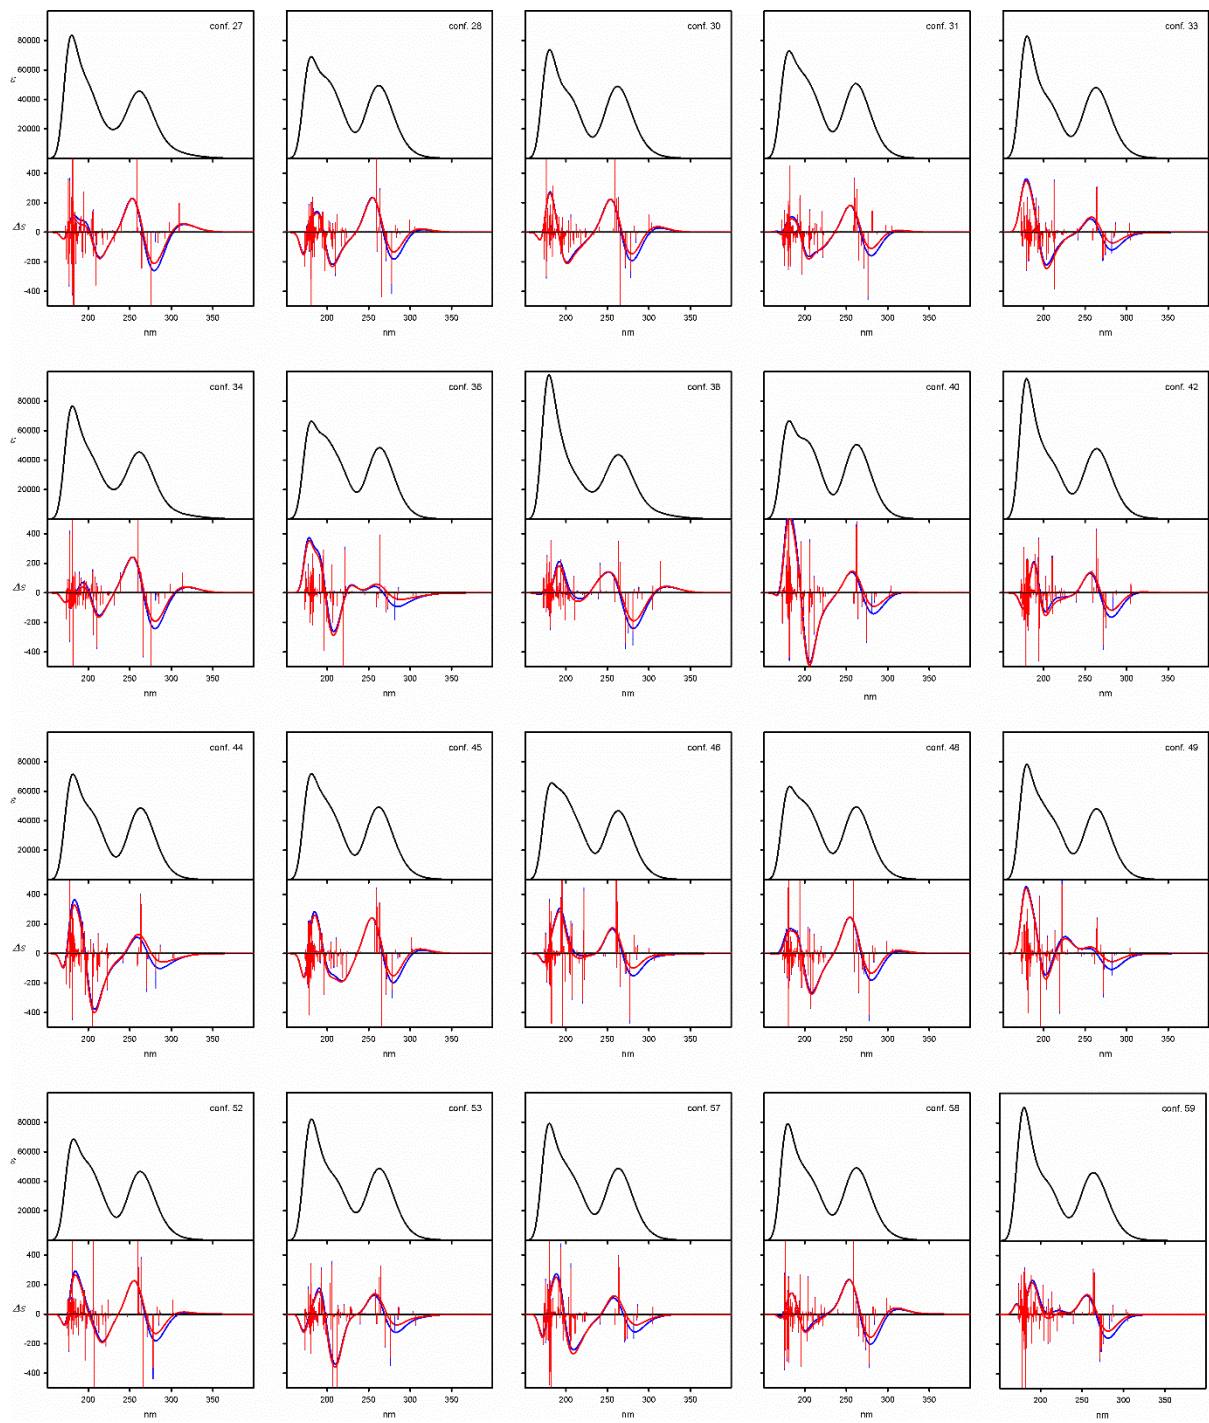



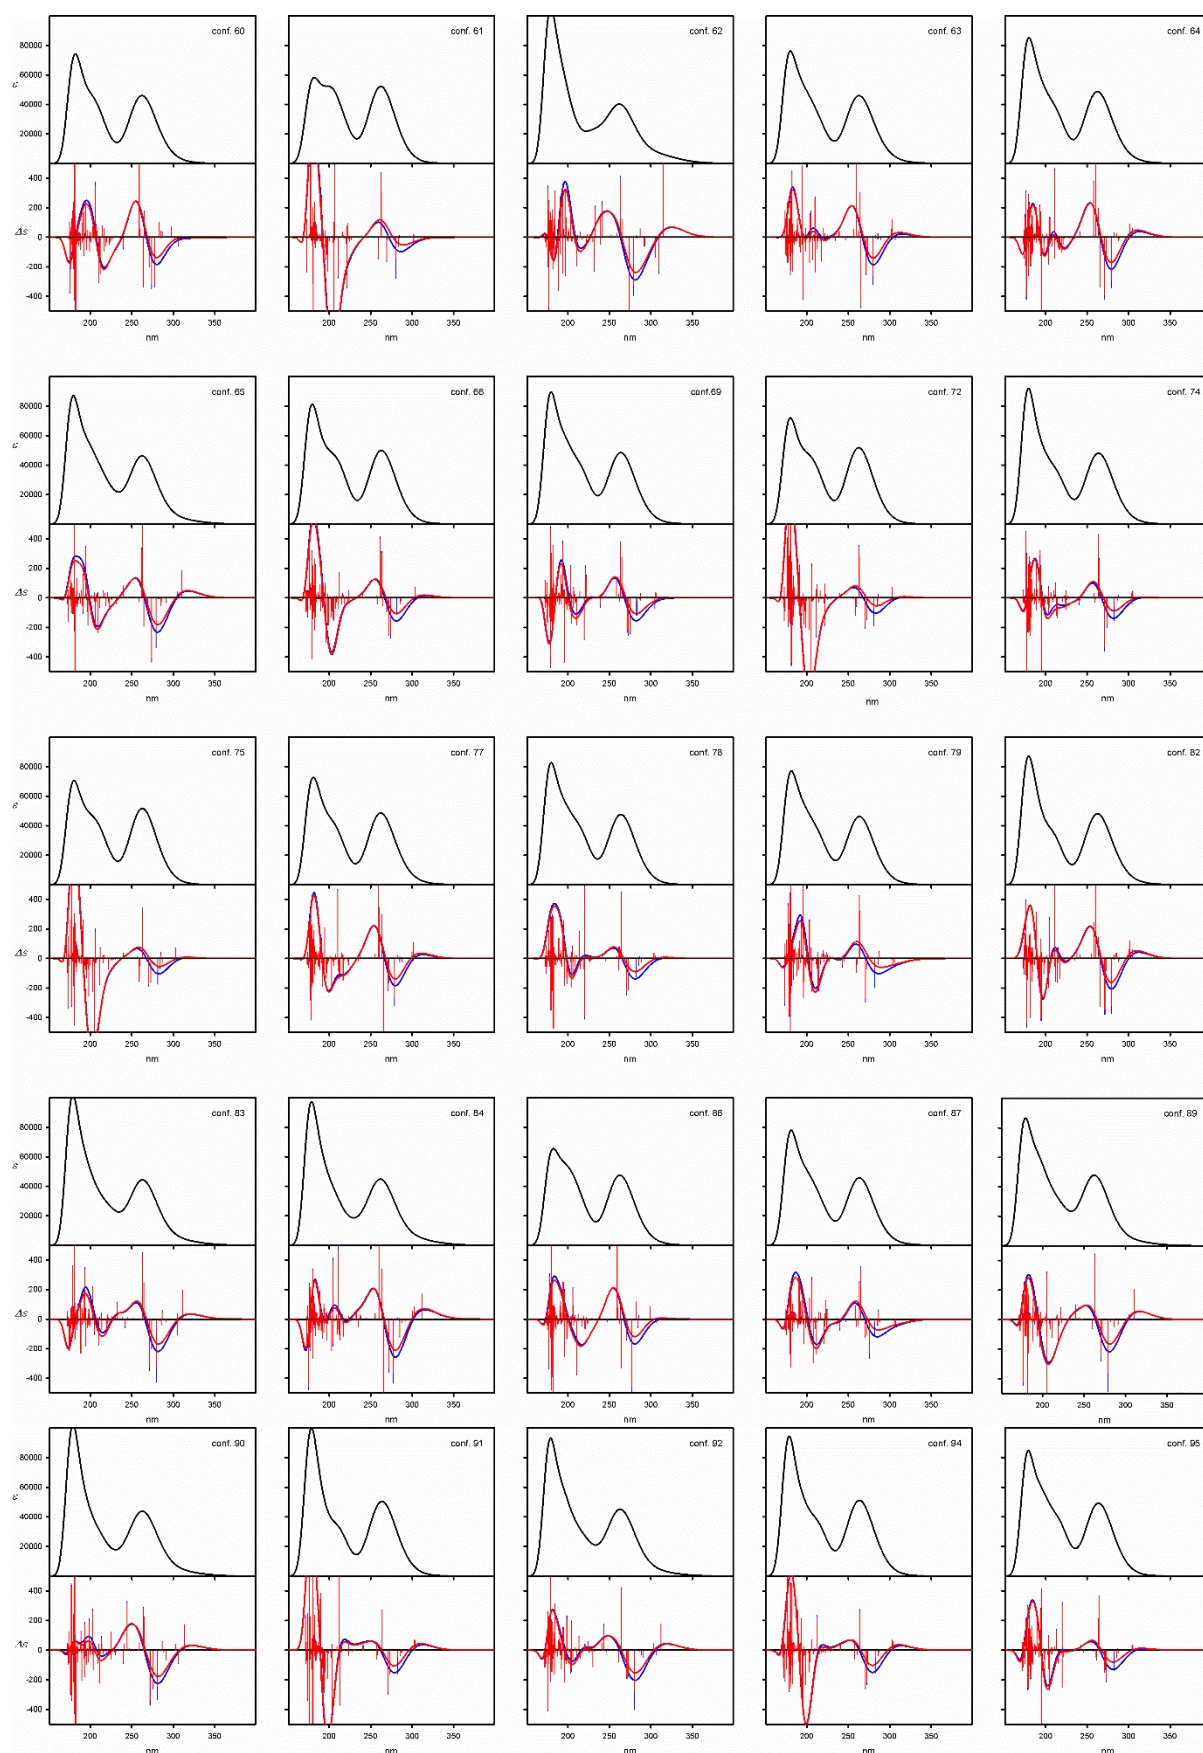

**Figure S114.** UV (upper panels) and ECD (lower panels) spectra calculated at the TD-M06-2X/6-311G(d,p) level for individual, non-symmetrical low-energy conformers of **6h**. Wavelengths were not corrected. Geometries were optimized at the B3LYP/6-311G(d,p) level.



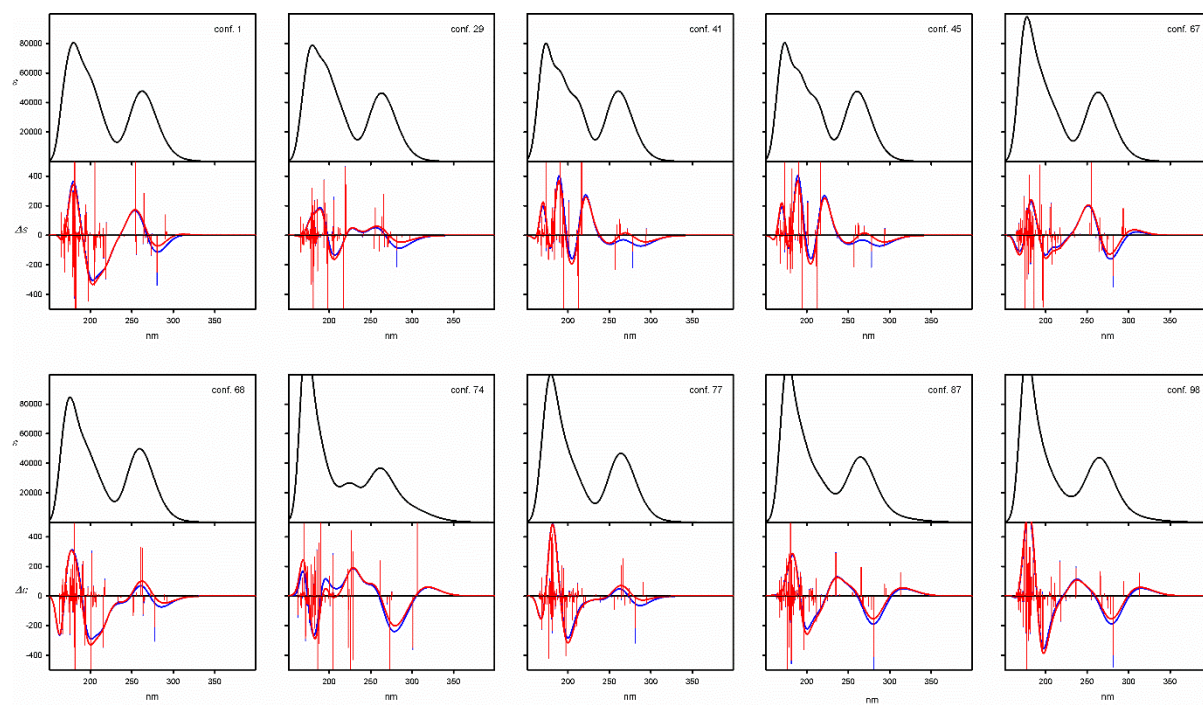

**Figure S115.** UV (upper panels) and ECD (lower panels) spectra calculated at the TD-wB97XD/6-311G(d,p) level for individual, symmetrical low-energy conformers of **6h**. Wavelengths were not corrected. Geometries were optimized at the B3LYP/6-311G(d,p) level.

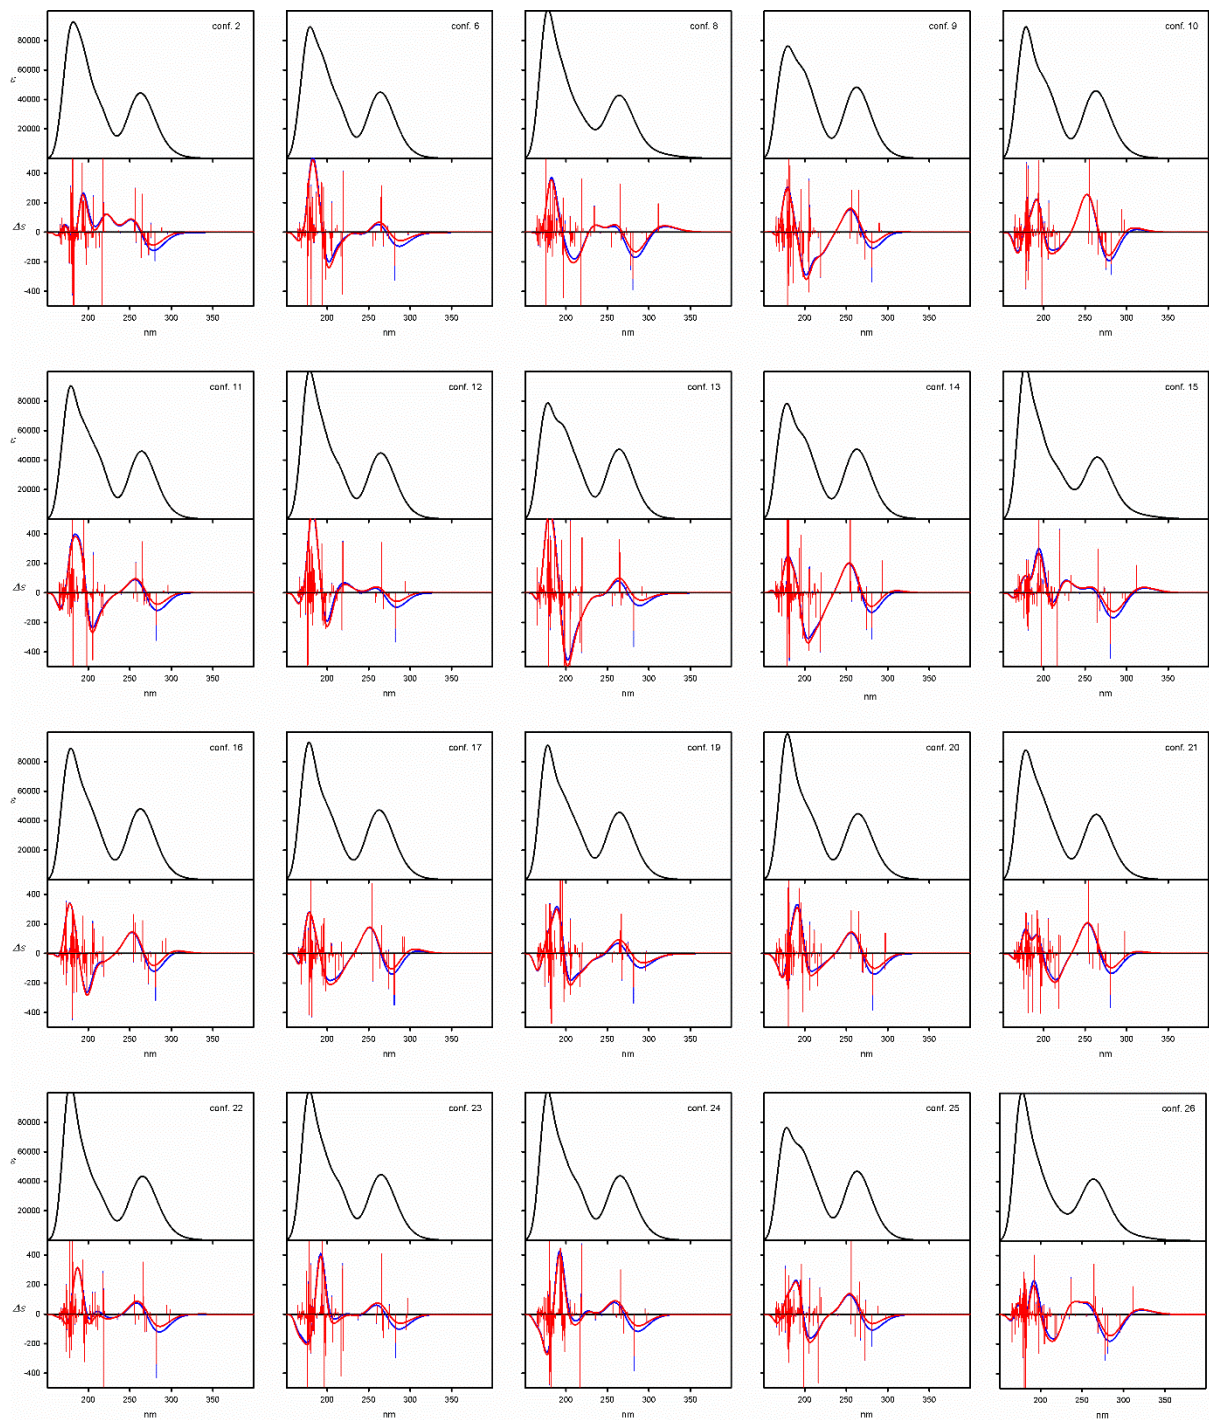



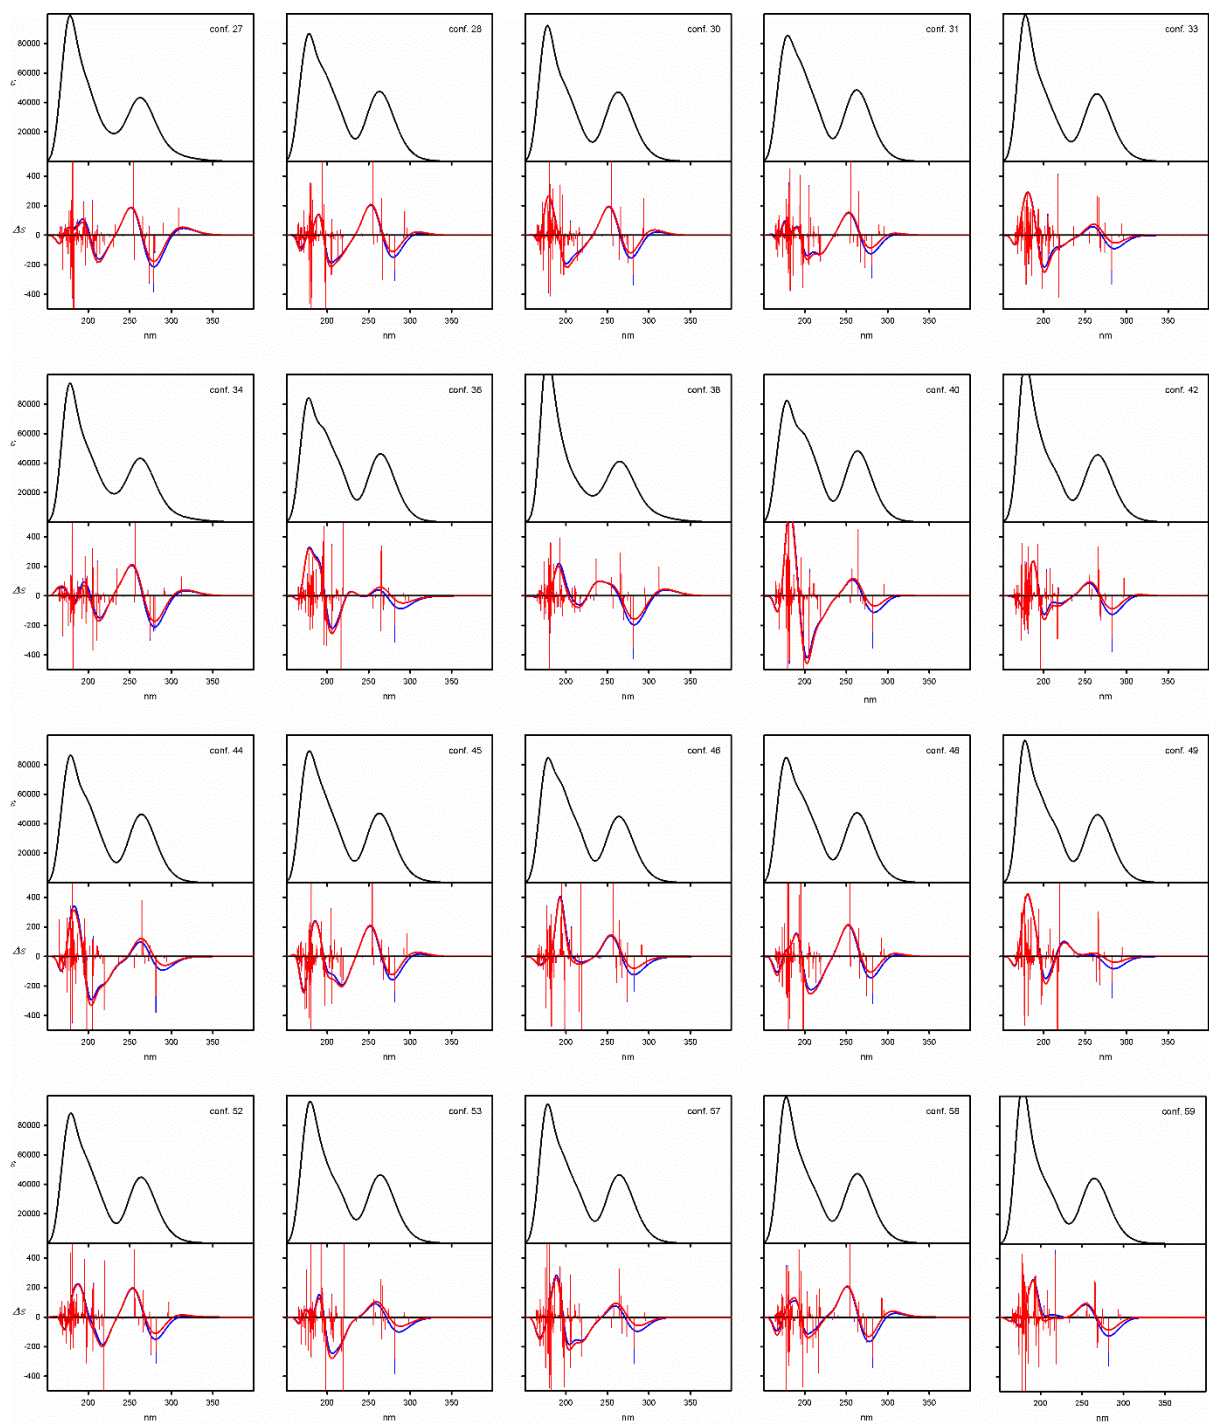

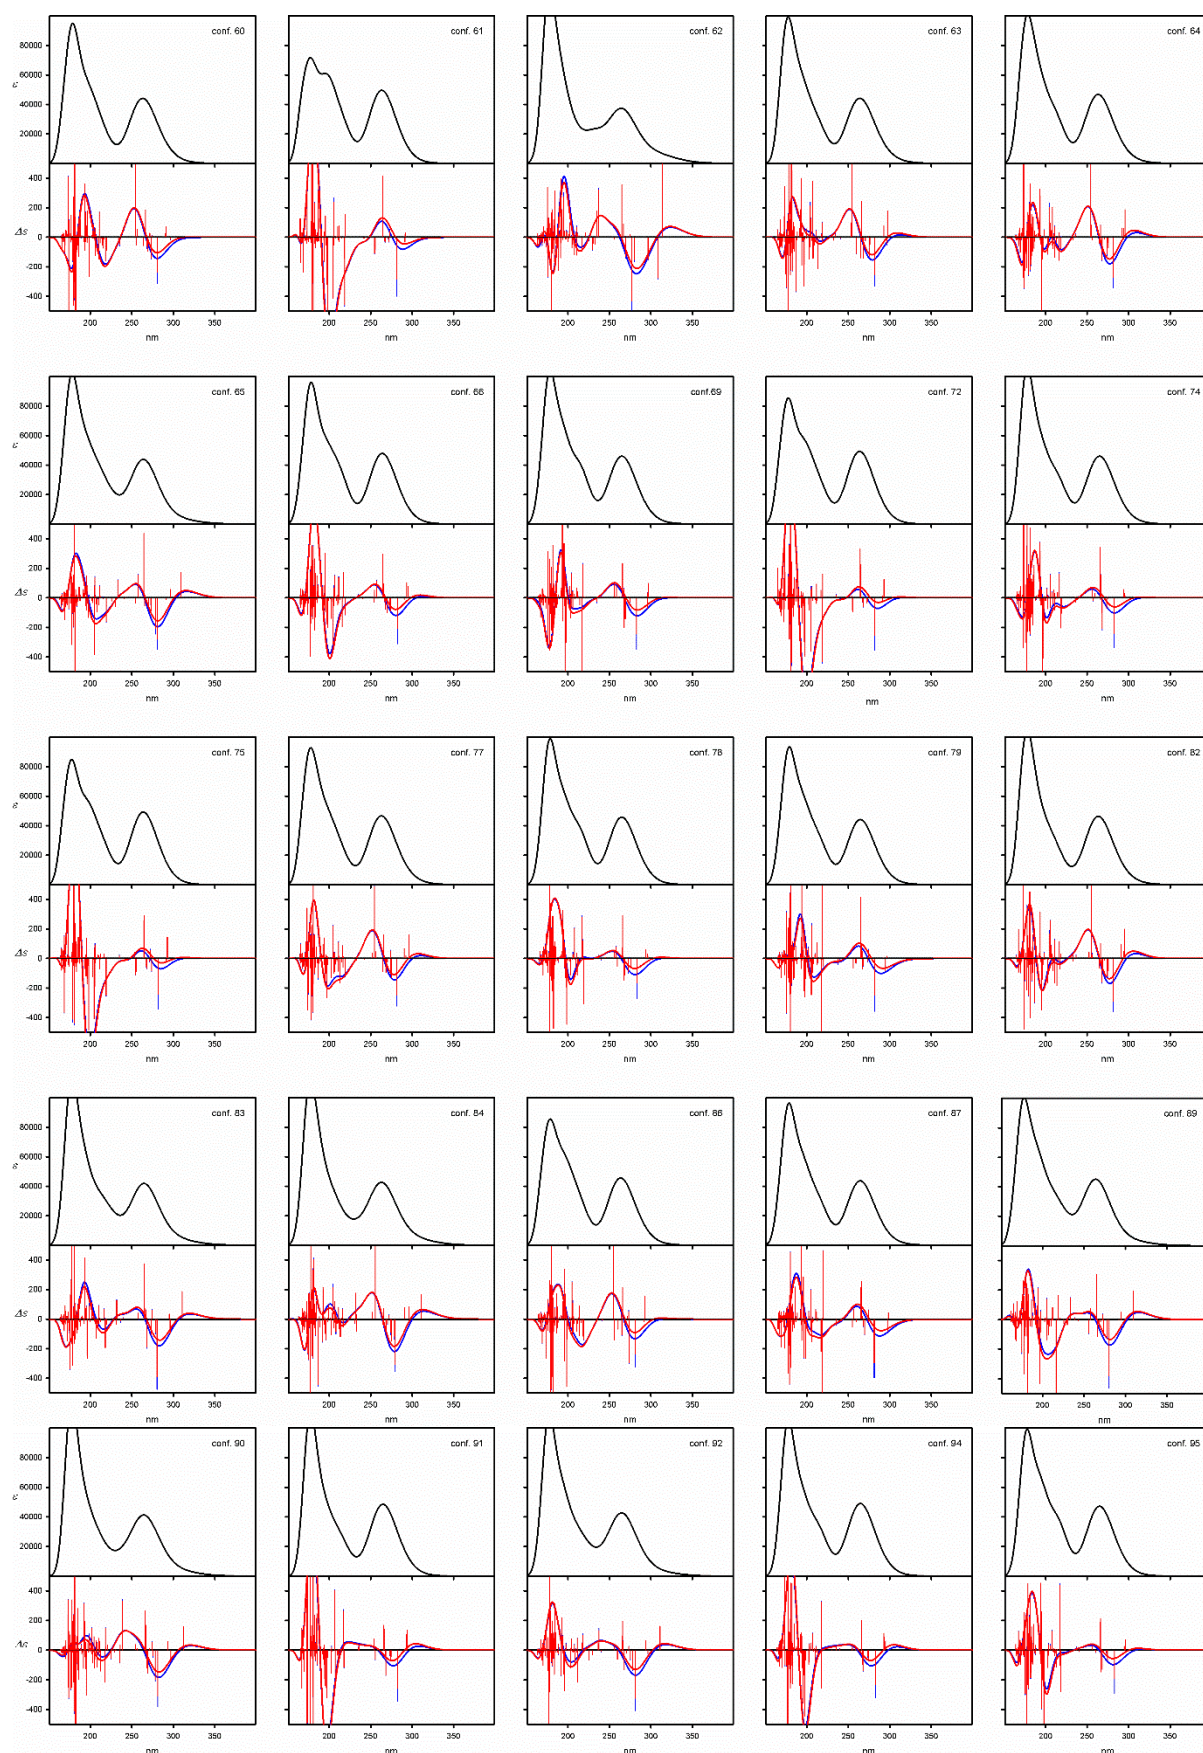

**Figure S116.** UV (upper panels) and ECD (lower panels) spectra calculated at the TD-wB97XD/6-311G(d,p) level for individual, non-symmetrical low-energy conformers of **6h**. Wavelengths were not corrected. Geometries were optimized at the B3LYP/6-311G(d,p) level.



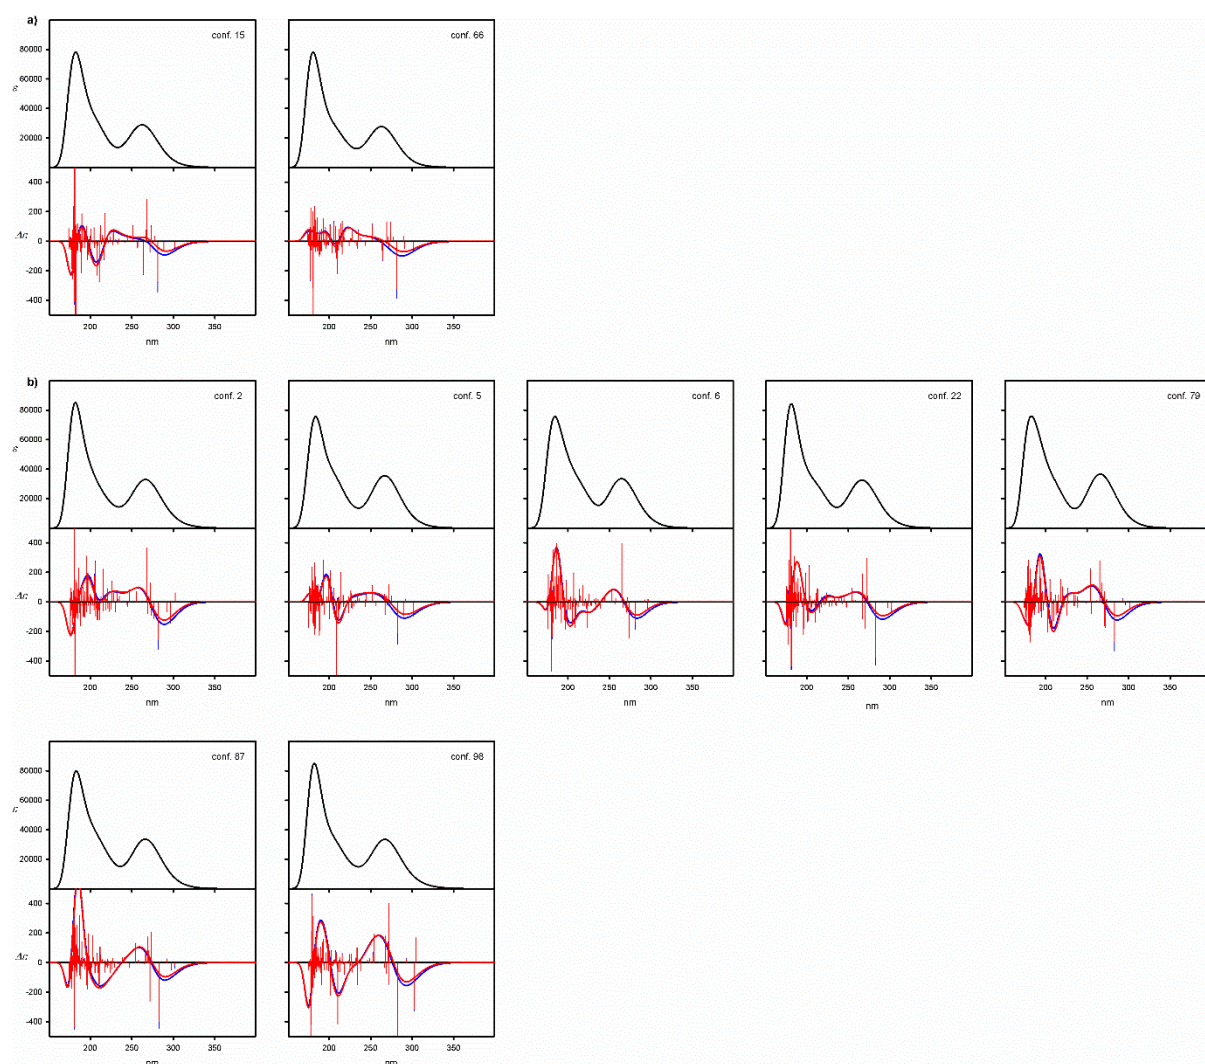

**Figure S117.** UV (upper panels) and ECD (lower panels) spectra calculated at the TD-CAM-B3LYP/6-311G(d,p) level for individual, a) symmetrical and b) non-symmetrical low-energy conformers of **6h**. Wavelengths were not corrected. Geometries were optimized at the B3LYP-GD3BJ/6-311G(d,p) level.



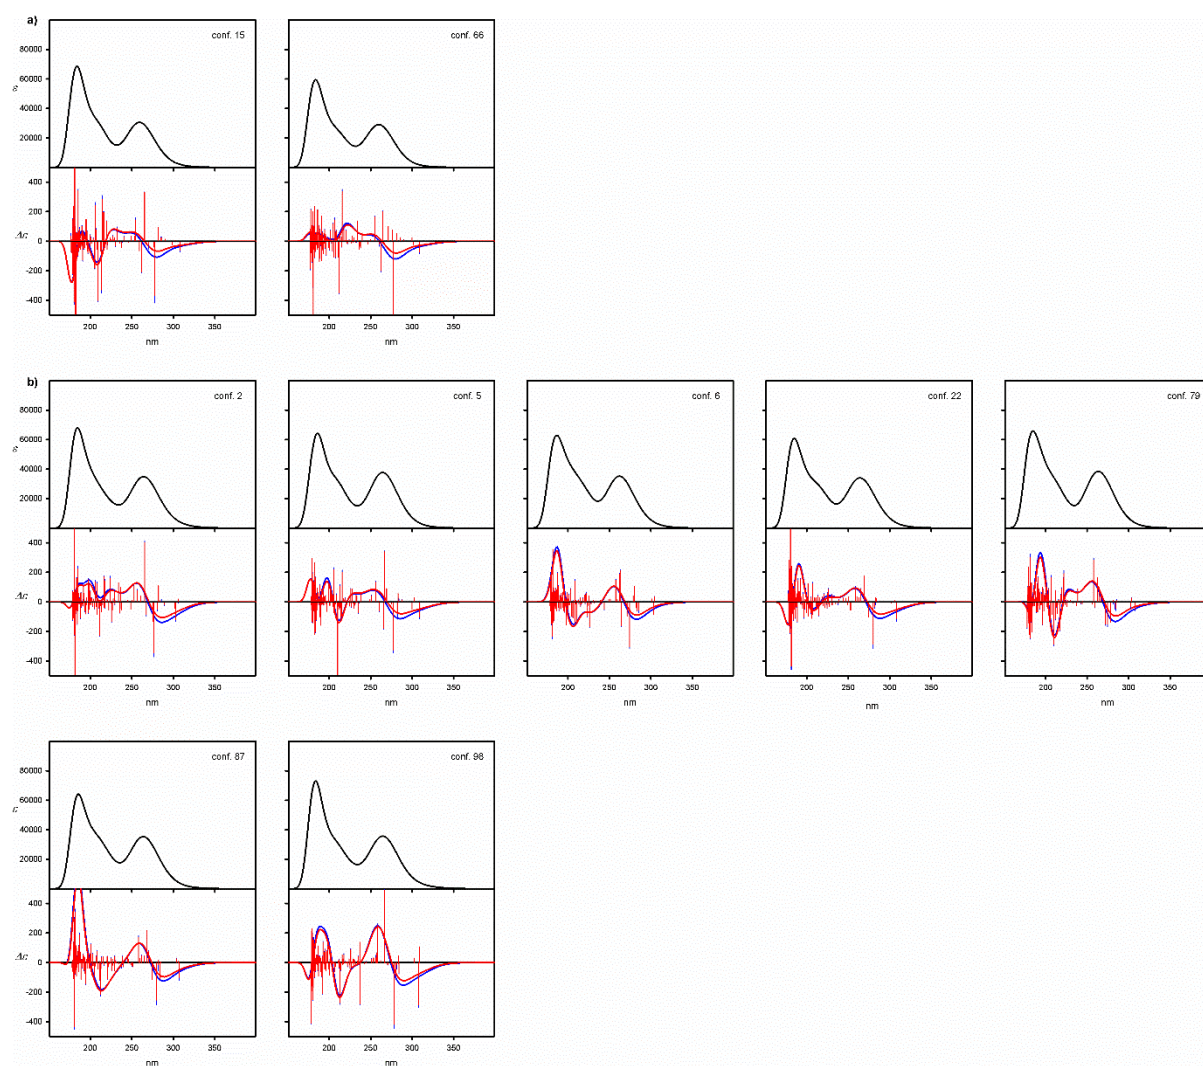

**Figure S118.** UV (upper panels) and ECD (lower panels) spectra calculated at the TD-M06-2X/6-311G(d,p) level for individual, a) symmetrical and b) non-symmetrical low-energy conformers of **6h**. Wavelengths were not corrected. Geometries were optimized at the B3LYP-GD3BJ/6-311G(d,p) level.

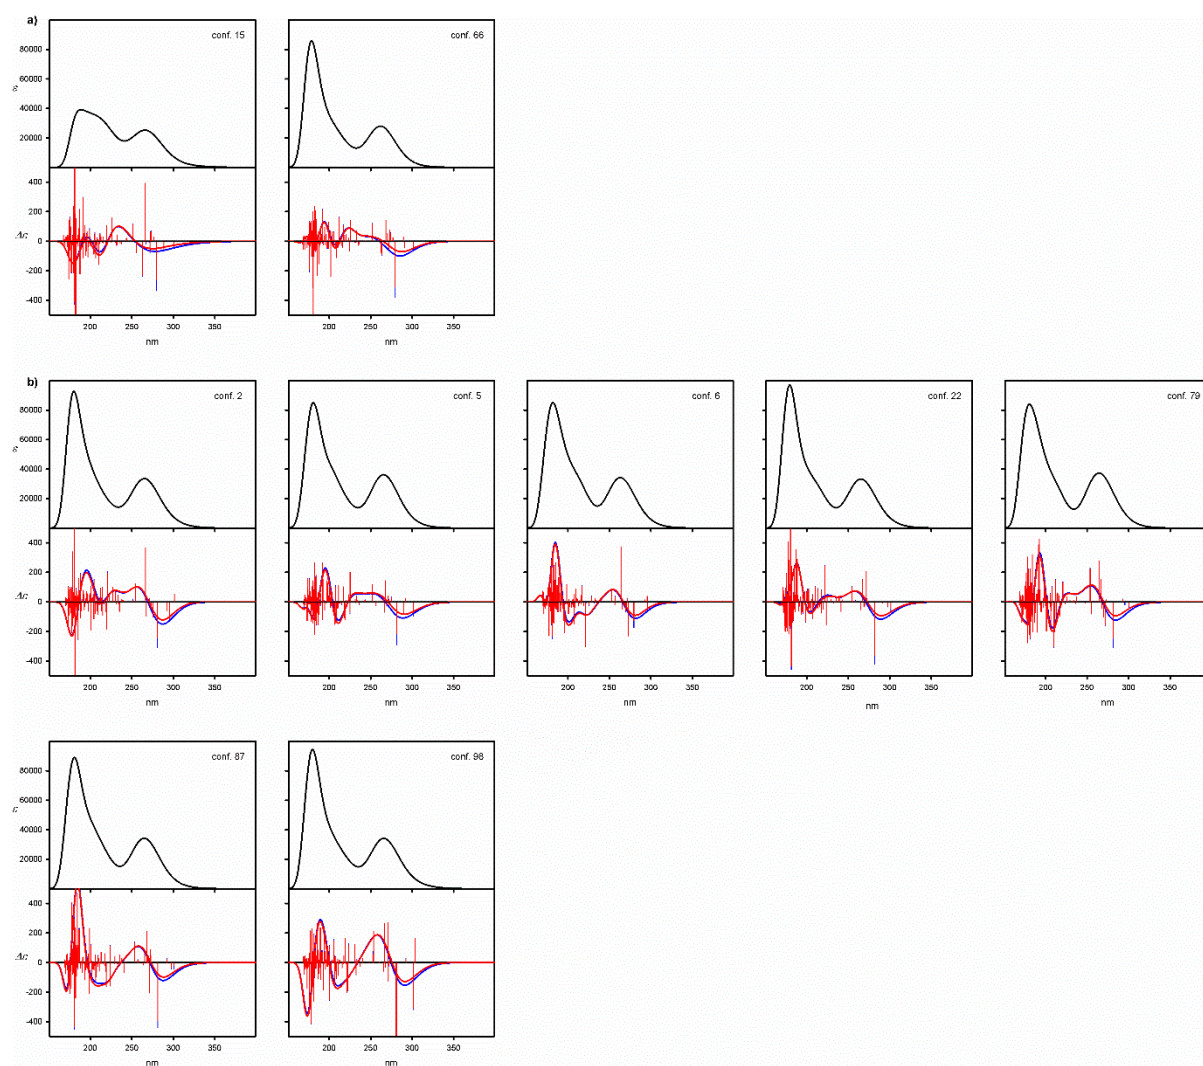

**Figure S119.** UV (upper panels) and ECD (lower panels) spectra calculated at the TD-wB97XD/6-311G(d,p) level for individual, a) symmetrical and b) non-symmetrical low-energy conformers of **6h**. Wavelengths were not corrected. Geometries were optimized at the B3LYP-GD3BJ/6-311G(d,p) level.

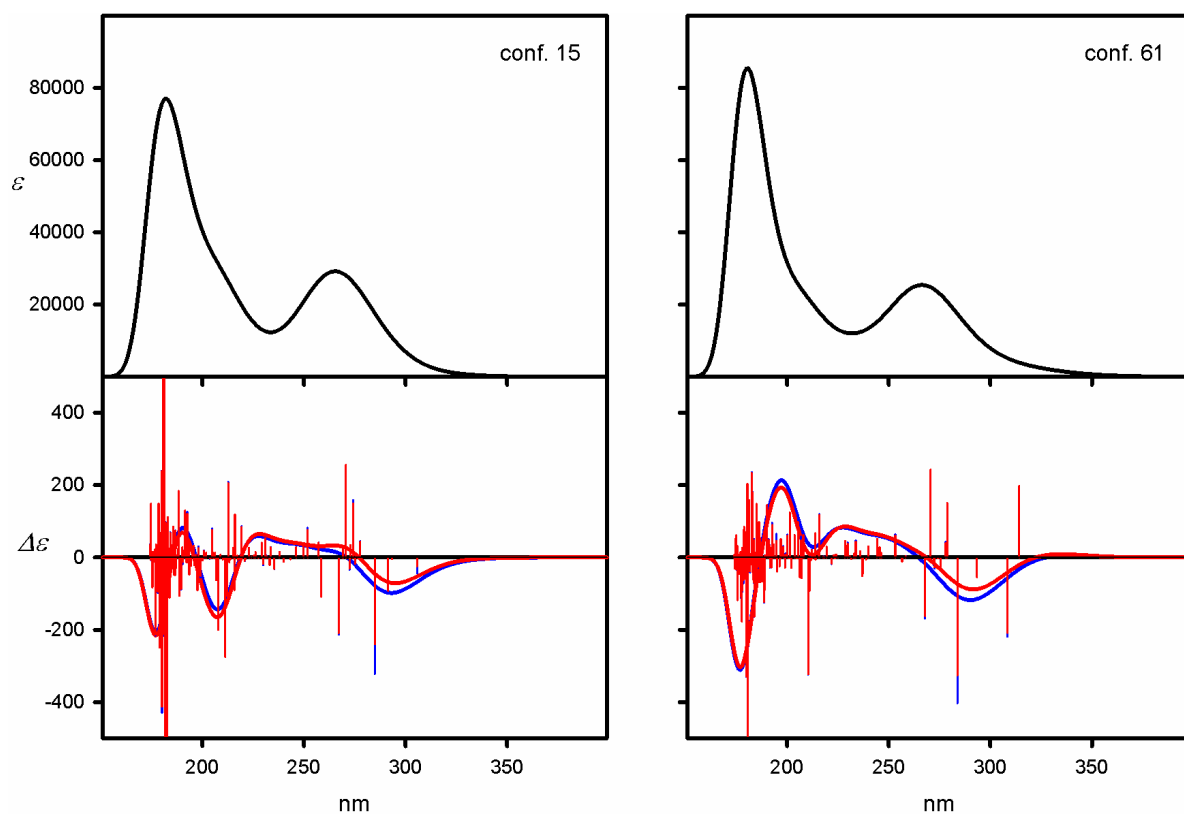

**Figure S120.** UV (upper panels) and ECD (lower panels) spectra calculated at the TD-CAM-B3LYP/6-311G(d,p) level for individual, symmetrical low-energy conformers of **6h**. Wavelengths were not corrected. Geometries were optimized at the M06L/6-311G(d,p) level.



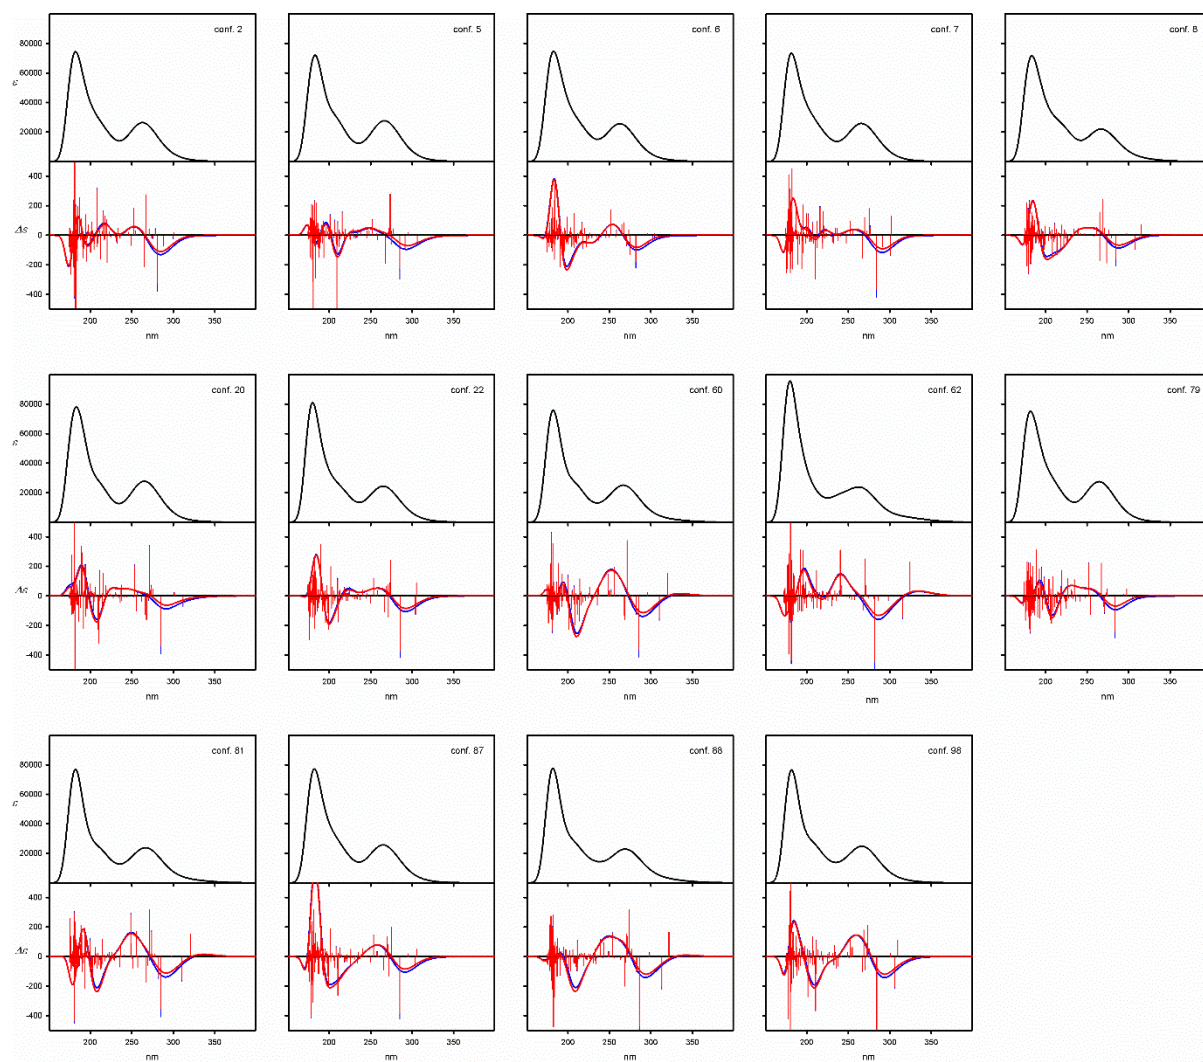

**Figure S121.** UV (upper panels) and ECD (lower panels) spectra calculated at the TD-CAM-B3LYP/6-311G(d,p) level for individual, non-symmetrical low-energy conformers of **6h**. Wavelengths were not corrected. Geometries were optimized at the M06L/6-311G(d,p) level.

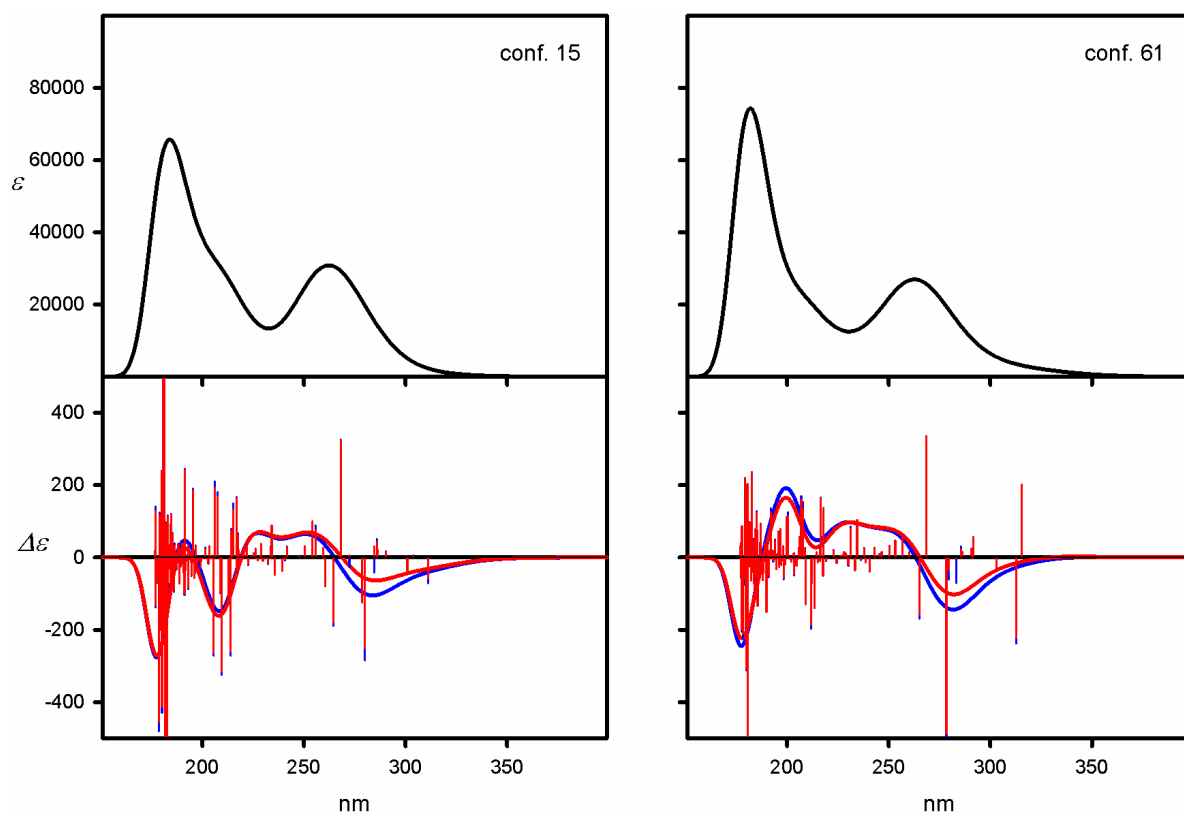

**Figure S122.** UV (upper panels) and ECD (lower panels) spectra calculated at the TD-M06-2X/6-311G(d,p) level for individual, symmetrical low-energy conformers of **6h**. Wavelengths were not corrected. Geometries were optimized at the M06L/6-311G(d,p) level.



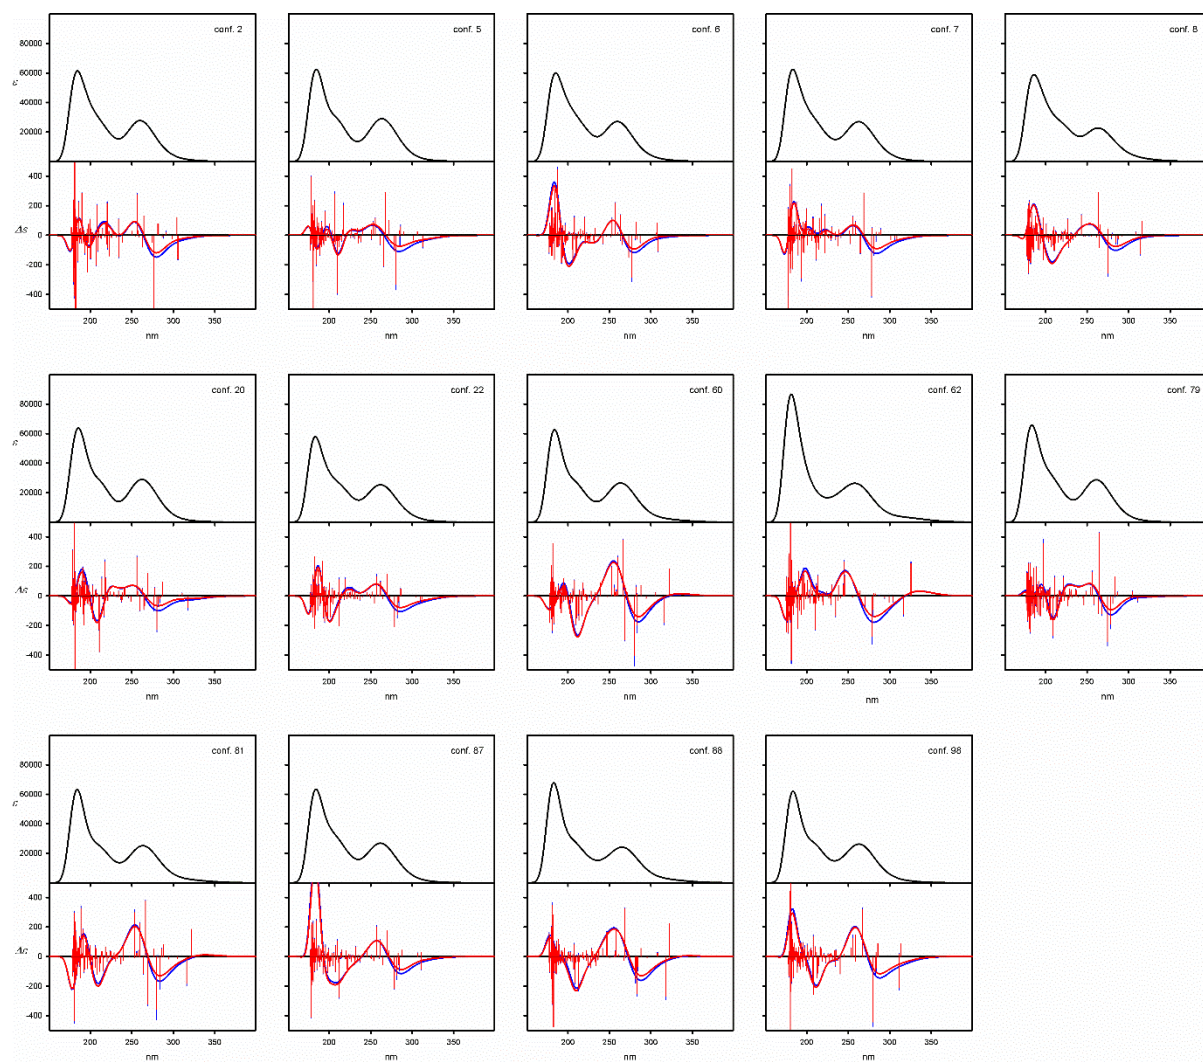

**Figure S123.** UV (upper panels) and ECD (lower panels) spectra calculated at the TD-M06-2X/6-311G(d,p) level for individual, non-symmetrical low-energy conformers of **6h**. Wavelengths were not corrected. Geometries were optimized at the M06L/6-311G(d,p) level.

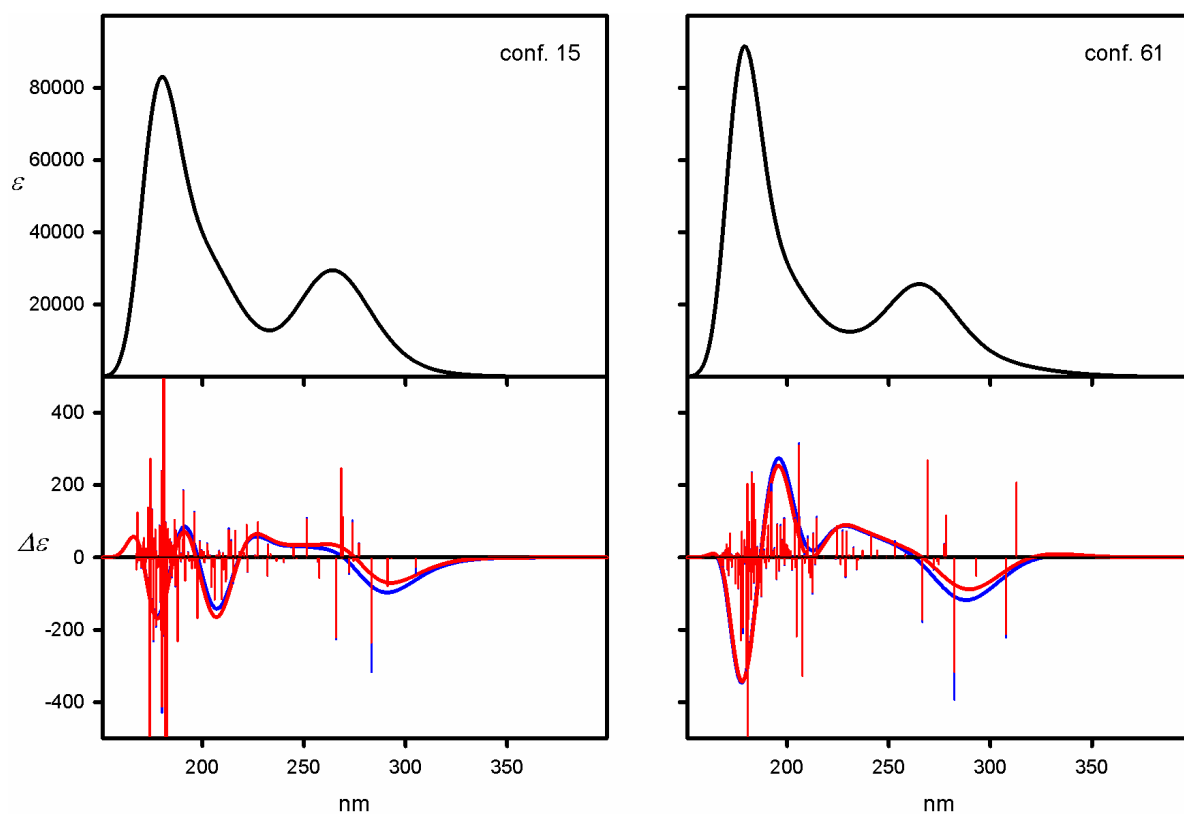

**Figure S124.** UV (upper panels) and ECD (lower panels) spectra calculated at the TD-wB97XD/6-311G(d,p) level for individual, symmetrical low-energy conformers of **6h**. Wavelengths were not corrected. Geometries were optimized at the M06L/6-311G(d,p) level.

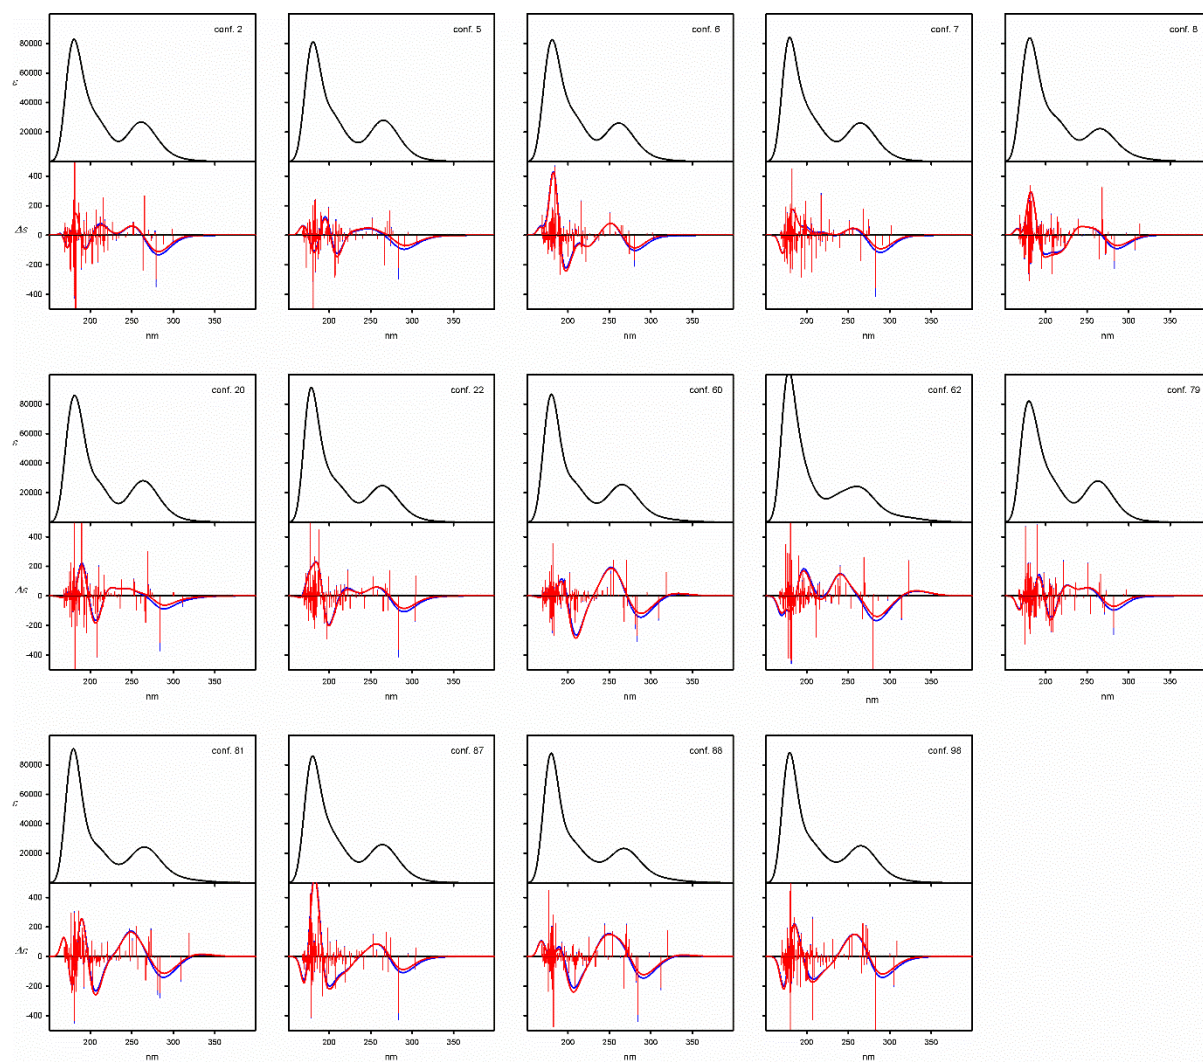

**Figure S125.** UV (upper panels) and ECD (lower panels) spectra calculated at the TD-wB97XD/6-311G(d,p) level for individual, non-symmetrical low-energy conformers of **6h**. Wavelengths were not corrected. Geometries were optimized at the M06L/6-311G(d,p) level.

#### 4 Single crystals X-ray analysis

All crystals subjected to X-ray analysis were mounted on loops by crystal protection grease. Reflection intensities for all samples were measured on an Oxford Diffraction SuperNova Atlas diffractometer equipped with a Cu  $K\alpha$  radiation source ( $\lambda = 1.54184 \text{ \AA}$ ) and an Atlas CCD detector. In all experiments, the diffraction data were collected at 130 K and the temperature was controlled with an Oxford Instruments Cryosystem cold nitrogen-gas blower. Data collection, reduction and analysis were carried out with CrysAlisPro software.[12] All crystal structures were solved by direct methods using SHELXT-2018 program,[13] and refined by full matrix least squares method on F2 using SHELXL-2018 program.[14] Non-hydrogen atoms were refined using anisotropic thermal parameters. Hydrogen atoms bonded to carbon atoms were placed in idealized positions and refined using the riding model, and their isotropic displacement parameters were set equal to 1.2Ueq(C).

Absolute structures of the compounds were specified by the synthetic procedure – from the known absolute configuration of *trans*-(*R,R*)-1,2-diaminocyclohexane, which was used as a starting material in the syntheses; and for measurements with a Cu  $K\alpha$  radiation source also confirmed using Flack parameter.[15] Graphical images were prepared using Olex2,[16] and Mercury programs.[17] Crystallographic data and refinement details are collected in **Table S17**. Selected geometrical parameters are juxtaposed in **Table S18**.

Analyzed crystal of **6f** was twinned and modeled with BASF parameter refined to 0.4212(9). In crystal **6f** solvent molecules have been identified on subsequent difference electron density maps but their disorder has not been precisely modelled. Instead, the electron density corresponding to these included solvent molecules was taken into account using the solvent mask procedure as implemented in Olex2 software.[16] A solvent mask was calculated and 256 electrons were found in a Volume of  $1930 \text{ \AA}^3$  in 1 void per unit cell. This is consistent with the presence of 1 hexane, 1 dichloromethane, 3 water molecules per asymmetric unit, which account for 244 electrons per unit cell. In macrocycle **6f**, one phenyl ring was modelled for disorder with the site occupation factors 0.55 and 0.45.

The crystals structure of **6g** contains a some amount of disordered solvent caged in intermolecular hole. A solvent mask was calculated and 46 electrons were found in a volume of  $203 \text{ \AA}^3$  in 1 void per unit cell. This is consistent with the presence of diethyl ether ( $\text{C}_4\text{H}_{10}\text{O}$ ) per asymmetric unit which account for 42 electrons per unit cell. The solvent mask procedure, implemented in Olex2 software was included in structure refinement. Additionally, the molecule of **6g** is disordered. In crystal structure symmetry of macrocyclic molecule is  $C_1$  with one of the three bromine atoms on the opposite side of the ring plane. However, the arrangement of substituent for 20% of the molecules is different and all three bromine atoms are on the same side of the molecule (the refined occupancy factor is 0.194).

CCDC **2394844** (**6b**), **2387654** (**6f**) and **2394845** (**6g**) contain the supplementary crystallographic data for this paper. These data can be obtained free of charge from The Cambridge Crystallographic Data Centre via [www.ccdc.cam.ac.uk/data%5Frequest/cif](http://www.ccdc.cam.ac.uk/data%5Frequest/cif).

**Table S17.** Selected crystal data and structure refinement details.

|                                                                                                                | <b>6b</b>                                                     | <b>6f</b>                                                                                                                                              | <b>6g</b>                                                                     |
|----------------------------------------------------------------------------------------------------------------|---------------------------------------------------------------|--------------------------------------------------------------------------------------------------------------------------------------------------------|-------------------------------------------------------------------------------|
| CCDC number                                                                                                    | <b>2394844</b>                                                | <b>2387654</b>                                                                                                                                         | <b>2394845</b>                                                                |
| Chemical formula                                                                                               | C <sub>90</sub> H <sub>96</sub> N <sub>6</sub> S <sub>6</sub> | C <sub>156</sub> H <sub>132</sub> N <sub>6</sub> S <sub>6</sub> · C <sub>6</sub> H <sub>14</sub> · CH <sub>2</sub> Cl <sub>2</sub> · 3H <sub>2</sub> O | C <sub>63</sub> H <sub>63</sub> Br <sub>3</sub> N <sub>6</sub> S <sub>3</sub> |
| <i>M<sub>r</sub></i>                                                                                           | 1454.08                                                       | 2508.17                                                                                                                                                |                                                                               |
| Crystal system, space group                                                                                    | Monoclinic, <i>P</i> 2 <sub>1</sub>                           | Monoclinic, <i>P</i> 2 <sub>1</sub>                                                                                                                    | Triclinic, <i>P</i> 1                                                         |
| Temperature (K)                                                                                                | 130                                                           | 130                                                                                                                                                    | 130                                                                           |
| <i>a</i> , <i>b</i> , <i>c</i> (Å)                                                                             | 12.56390 (11),<br>17.58334 (11),<br>18.66386 (19)             | 20.1919 (1),<br>17.5652 (1),<br>20.9011 (1)                                                                                                            | 9.7084 (3),<br>12.0742 (4),<br>14.9689 (4)                                    |
| $\alpha$ , $\beta$ , $\gamma$ (°)                                                                              | 103.5053 (9)                                                  | 90.865 (1)                                                                                                                                             | 92.032 (3),<br>102.902 (3),<br>107.401 (3)                                    |
| <i>V</i> (Å <sup>3</sup> )                                                                                     | 4009.12 (6)                                                   | 7412.25 (7)                                                                                                                                            | 1622.20 (10)                                                                  |
| <i>Z</i>                                                                                                       | 2                                                             | 2                                                                                                                                                      | 1                                                                             |
| Radiation type                                                                                                 | Cu <i>K</i> α                                                 |                                                                                                                                                        |                                                                               |
| $\mu$ (mm <sup>-1</sup> )                                                                                      | 1.95                                                          | 1.62                                                                                                                                                   | 3.52                                                                          |
| Crystal size (mm)                                                                                              | 0.2 × 0.1 × 0.03                                              | 0.9 × 0.3 × 0.1                                                                                                                                        | 0.1 × 0.05 × 0.01                                                             |
| <i>T</i> <sub>min</sub> , <i>T</i> <sub>max</sub>                                                              | 0.803, 1.000                                                  | 0.269, 0.269                                                                                                                                           | -                                                                             |
| No. of measured, independent and observed [ <i>I</i> > 2σ( <i>I</i> )] reflections                             | 49709, 16379, 15519                                           | 80527, 80527, 76491                                                                                                                                    | 24968, 11767, 10295                                                           |
| <i>R</i> <sub>int</sub>                                                                                        | 0.029                                                         | ?                                                                                                                                                      | 0.038                                                                         |
| (sin $\theta$ /λ) <sub>max</sub> (Å <sup>-1</sup> )                                                            | 0.631                                                         | 0.629                                                                                                                                                  | 0.631                                                                         |
| <i>R</i> [ <i>F</i> <sup>2</sup> > 2σ( <i>F</i> <sup>2</sup> )], <i>wR</i> ( <i>F</i> <sup>2</sup> ), <i>S</i> | 0.035, 0.091, 1.02                                            | 0.067, 0.189, 1.05                                                                                                                                     | 0.046, 0.115, 1.03                                                            |
| No. of reflections                                                                                             | 16379                                                         | 80527                                                                                                                                                  | 11767                                                                         |
| No. of parameters                                                                                              | 1257                                                          | 1508                                                                                                                                                   | 698                                                                           |
| No. of restraints                                                                                              | 55                                                            | 109                                                                                                                                                    | 211                                                                           |
| $\Delta\rho_{\text{max}}$ , $\Delta\rho_{\text{min}}$ (e Å <sup>-3</sup> )                                     | 0.28, -0.32                                                   | 0.37, -0.63                                                                                                                                            | 0.48, -0.52                                                                   |
| Absolute structure parameter                                                                                   | -0.005 (4)                                                    | 0.056 (7)                                                                                                                                              | -0.028 (13)                                                                   |



**Table S18.** The helicity of trityl groups in molecule **6f** in the crystal structure. The conformation of each phenyl ring in a given trityl group was defined by its helicity which can be either M ( $90 < \phi < 0$ ), P ( $0 < \phi < 90$ ) or O (for  $\phi$  angles deviating from planarity by  $\pm 5$ ).

|              | $\phi$ (°)        | helicity   |
|--------------|-------------------|------------|
| <b>S1-Tr</b> | -23.2(5)          | <i>MPP</i> |
|              | 34.8(5)           |            |
|              | 74.0(5)           |            |
| <b>S2-Tr</b> | 83.5(4)           | <i>PPP</i> |
|              | 6.5(5)            |            |
|              | 43.2(4)           |            |
| <b>S3-Tr</b> | 81.7(5)           | <i>PPP</i> |
|              | 11.6(9) / 30.6(9) |            |
|              | 37.5(6)           |            |
| <b>S4-Tr</b> | 87.0(4)           | <i>PMP</i> |
|              | -9.4(6)           |            |
|              | 35.8(5)           |            |
| <b>S5-Tr</b> | -48.7(5)          | <i>MMM</i> |
|              | -58.4(6)          |            |
|              | -6.9(6)           |            |
| <b>S6-Tr</b> | 84.2(4)           | <i>POP</i> |
|              | -3.8(5)           |            |
|              | 35.8(5)           |            |

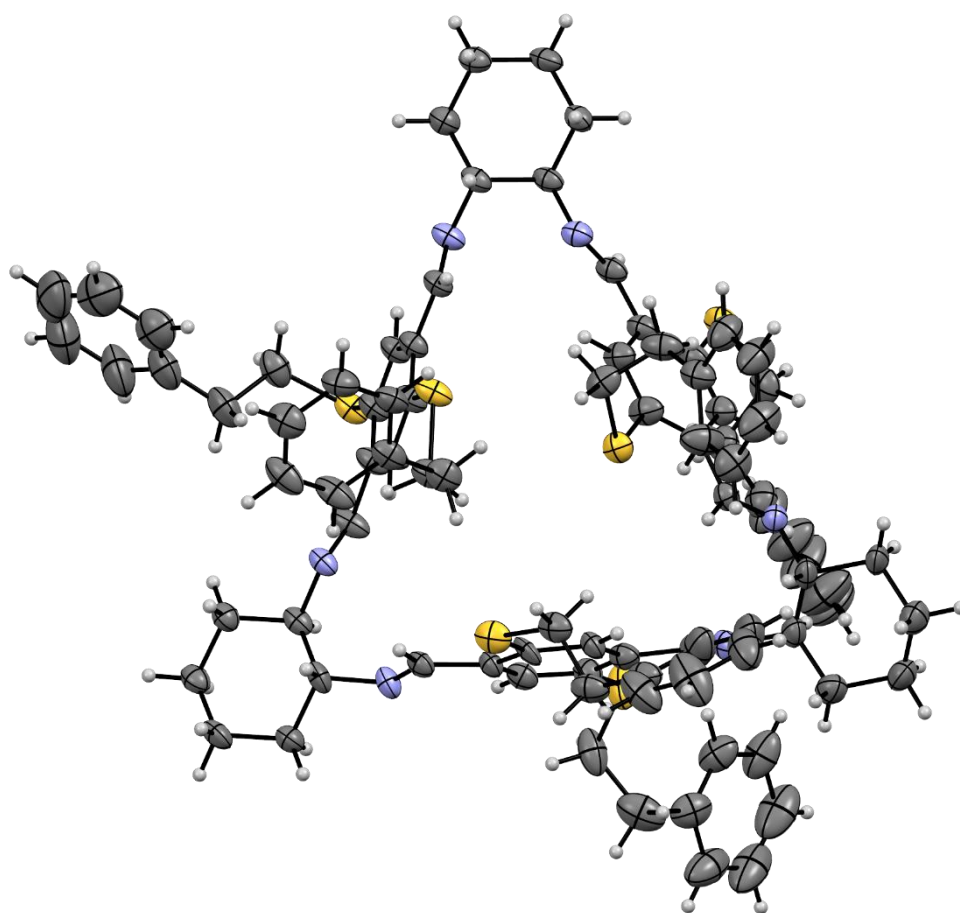

**Figure S126.** Structure of the macrocyclic molecule **6b**. Displacement ellipsoids are drawn at the 30% probability level. Hydrogen atoms are represented in arbitrary radii.

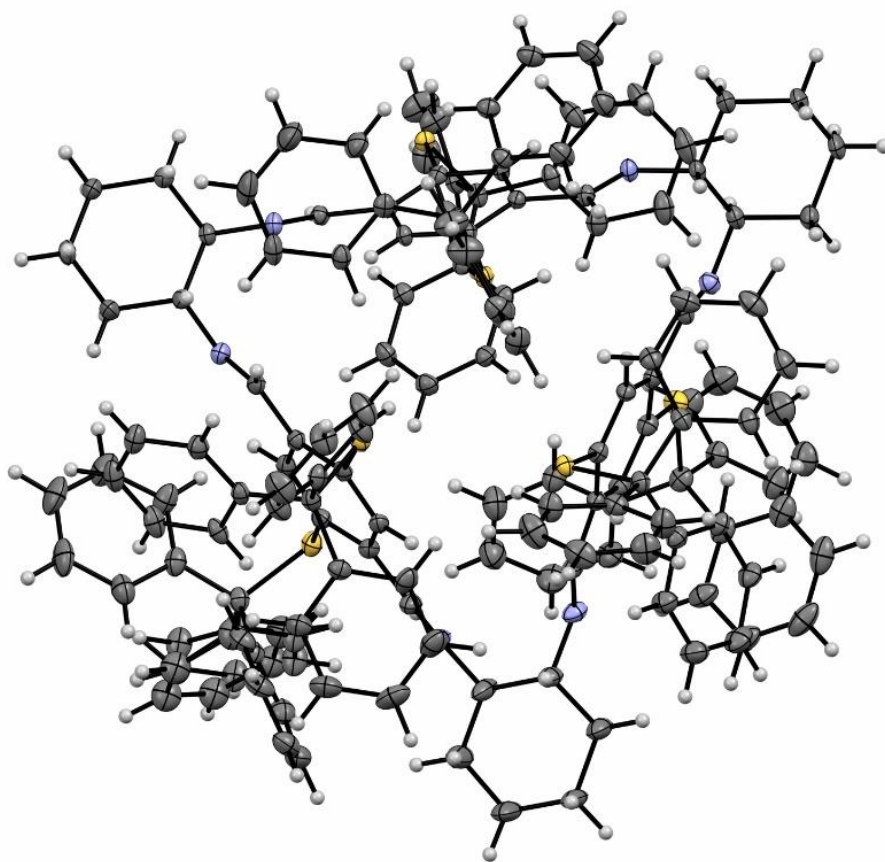

**Figure S127.** Structure of the macrocyclic molecule **6f**. Displacement ellipsoids are drawn at the 30% probability level. Hydrogen atoms are represented in arbitrary radii.

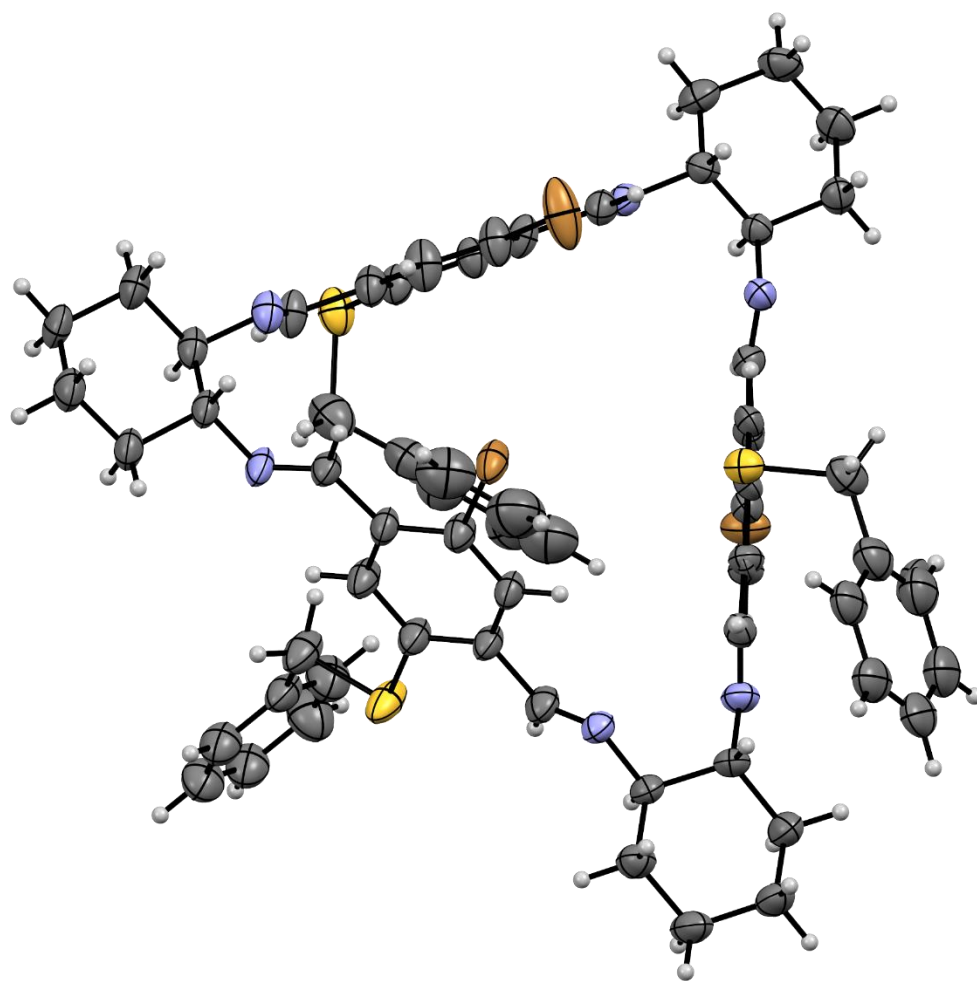

**Figure S128.** Structure of the macrocyclic molecule **6g**. Displacement ellipsoids are drawn at the 30% probability level. Hydrogen atoms are represented in arbitrary radii.

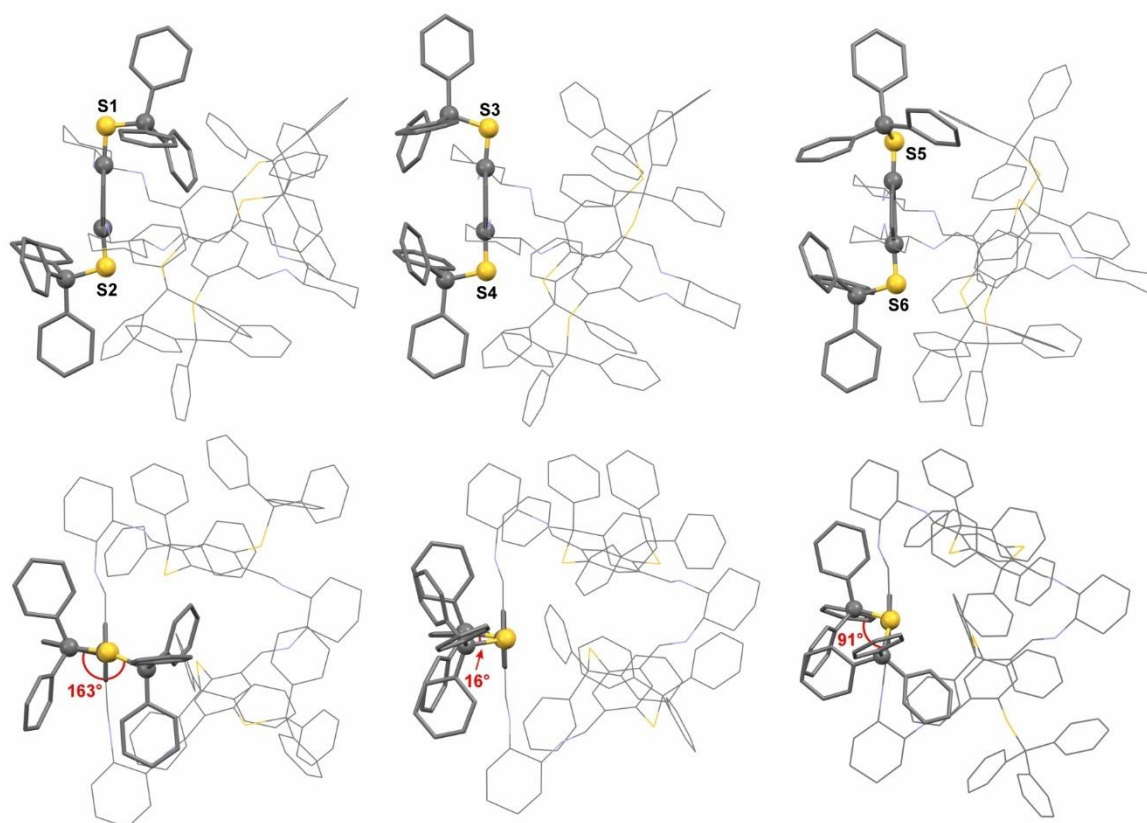

**Figure S129.** Arrangement of aromatic linkers with anchored –STr groups in the molecule **6f** in crystal. The *pseudotorsion* angles values, C(Tr)-S-(Ar)-S-C(Tr), are highlighted in red.

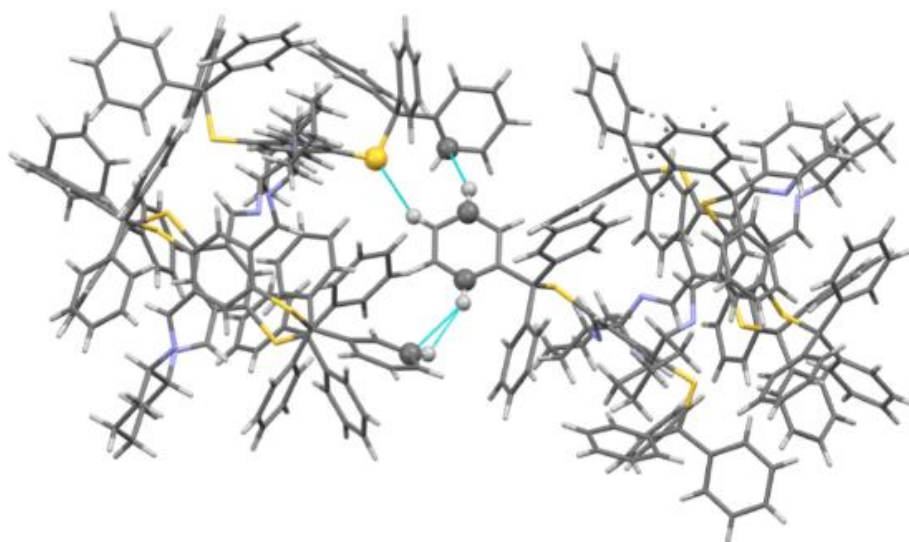

**Figure S130.** Supramolecular architecture in **6f** crystals created between macrocycles. Selected intermolecular interactions are indicated in blue dash lines.



5 Copies of  $^1\text{H}$  and  $^{13}\text{C}$  NMR spectra

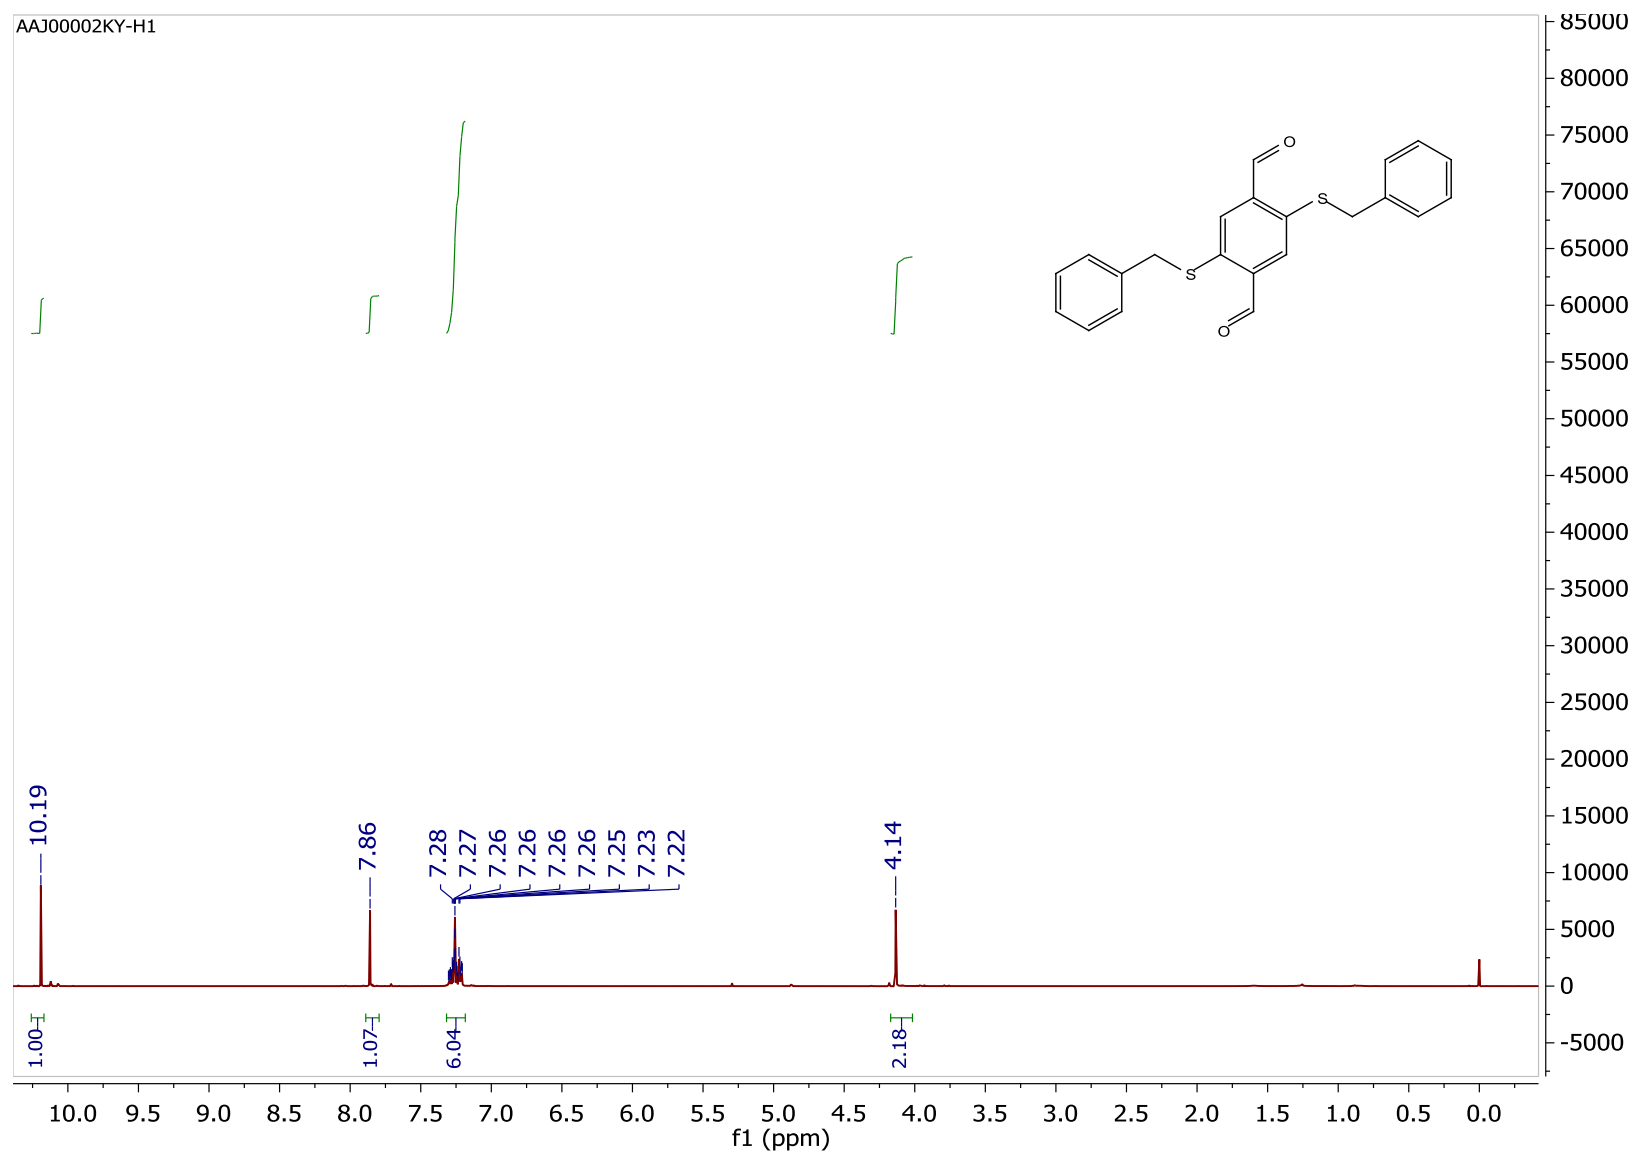

**Figure S131.** Copy of  $^1\text{H}$  NMR spectrum ( $\text{CDCl}_3$ , 400 MHz, RT) of **5a**.

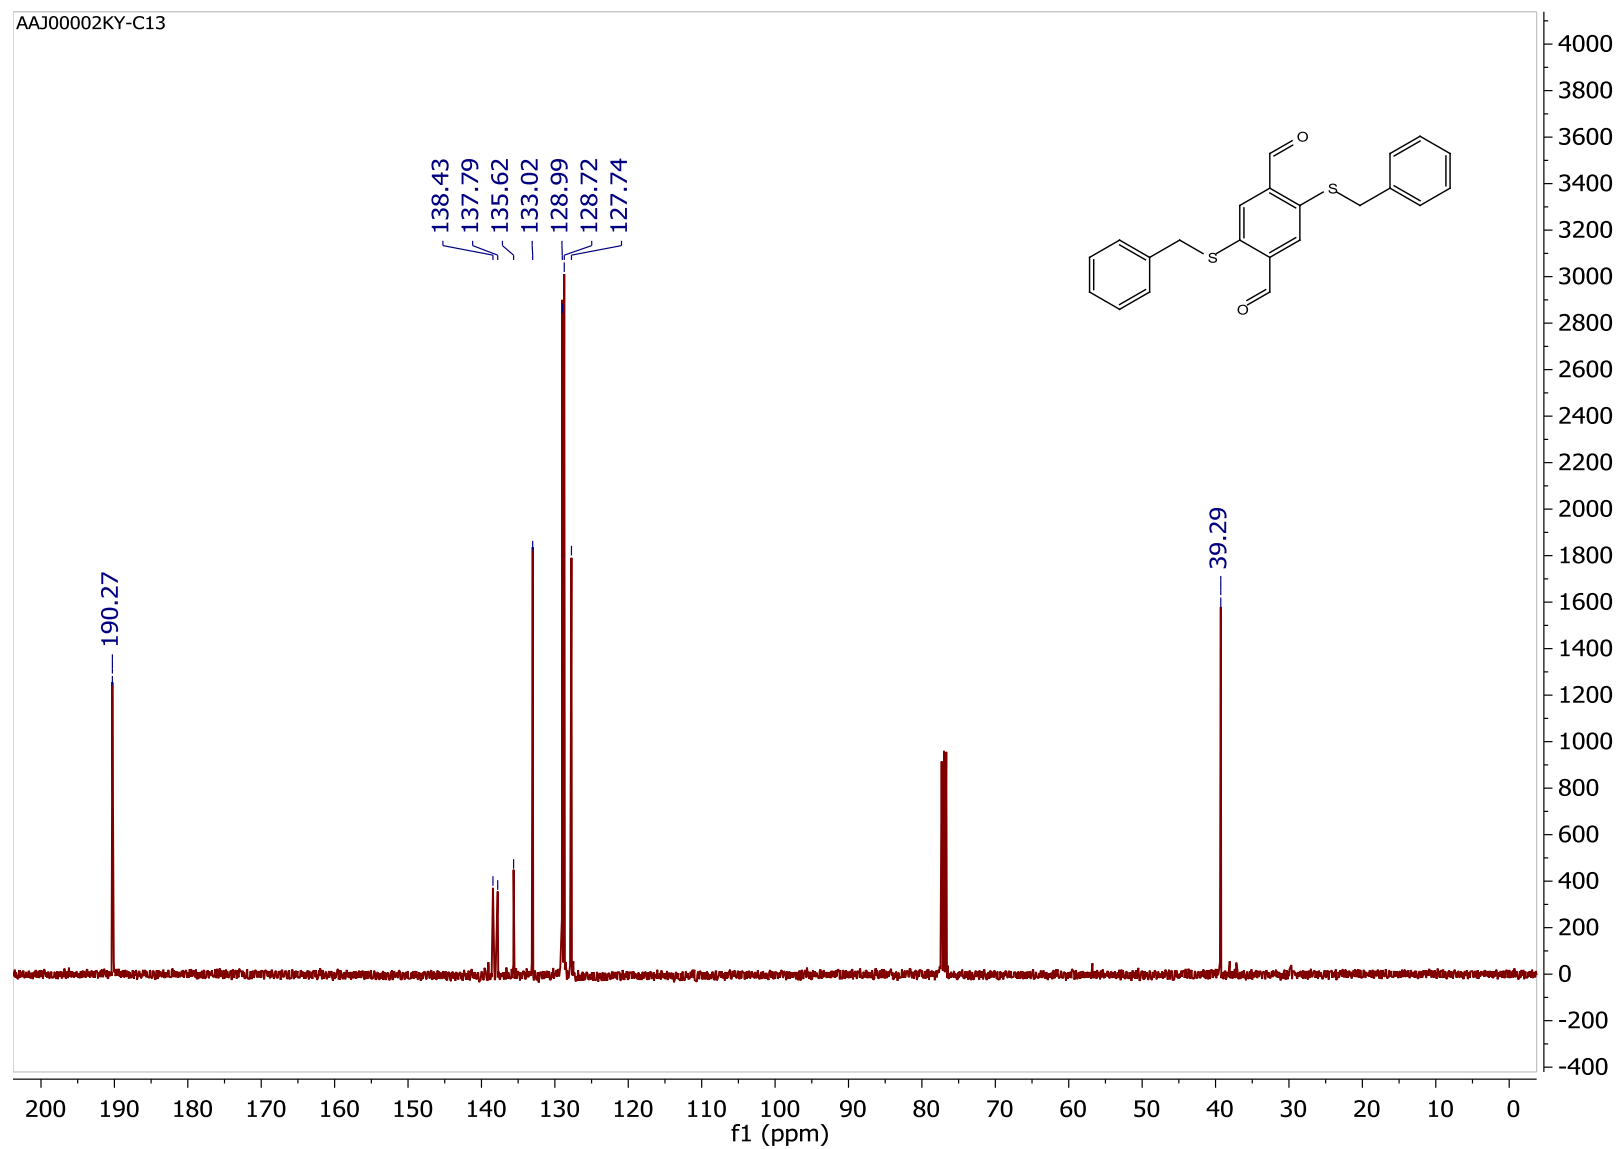

**Figure S132.** Copy of  $^{13}\text{C}\{^1\text{H}\}$  NMR spectrum ( $\text{CDCl}_3$ , 101 MHz, RT) of **5a**.

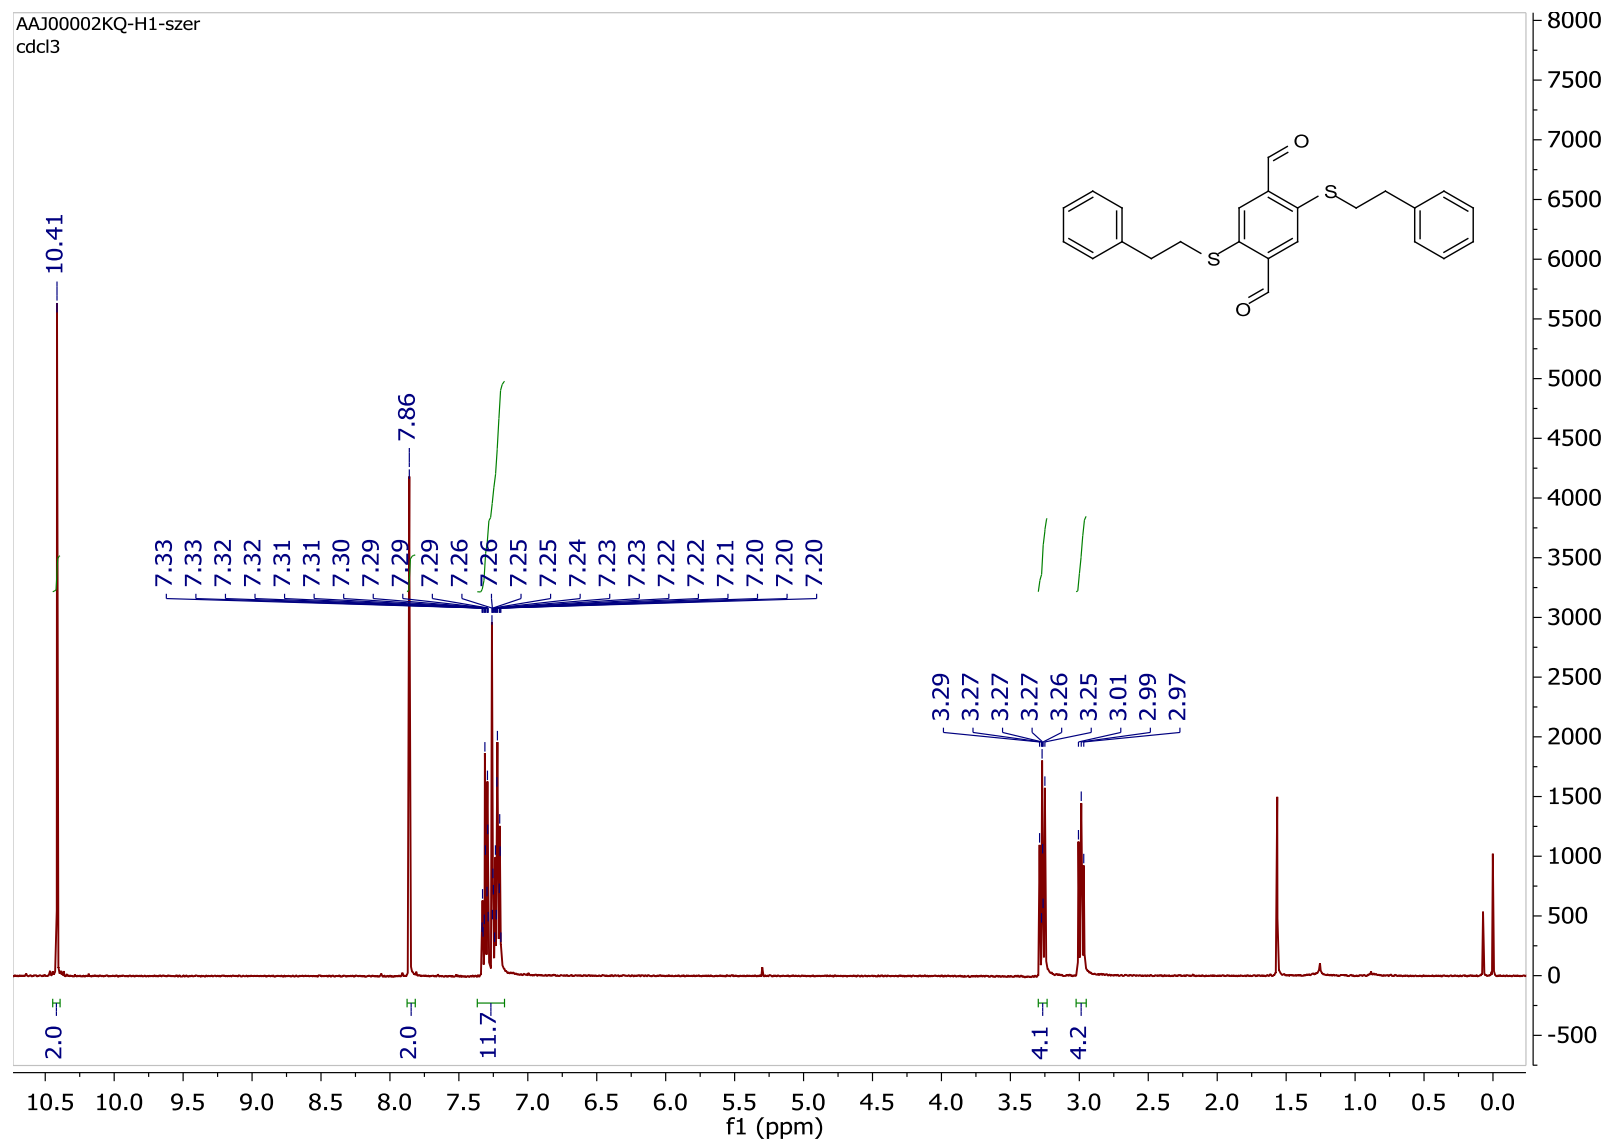

**Figure S133.** Copy of  $^1\text{H}$  NMR spectrum ( $\text{CDCl}_3$ , 400 MHz, RT) of **5b**.

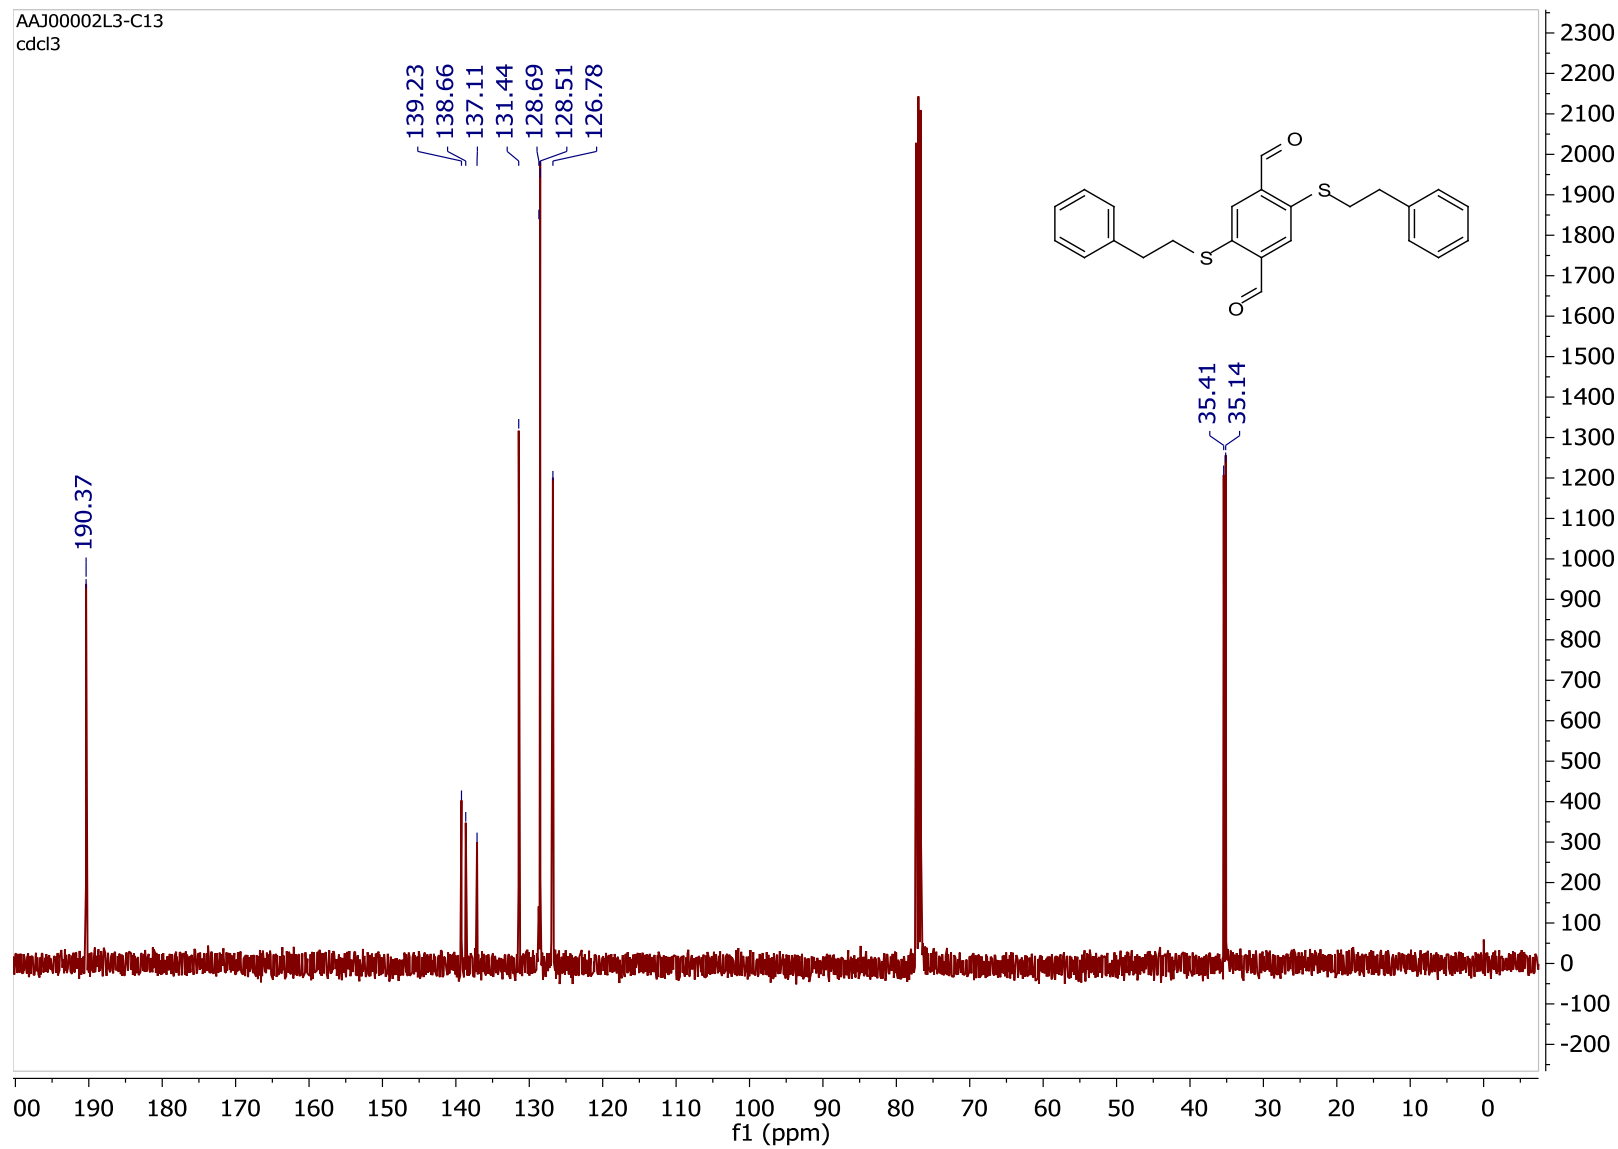

**Figure S134.** Copy of  $^{13}\text{C}\{^1\text{H}\}$  NMR spectrum ( $\text{CDCl}_3$ , 101 MHz, RT) of **5b**.



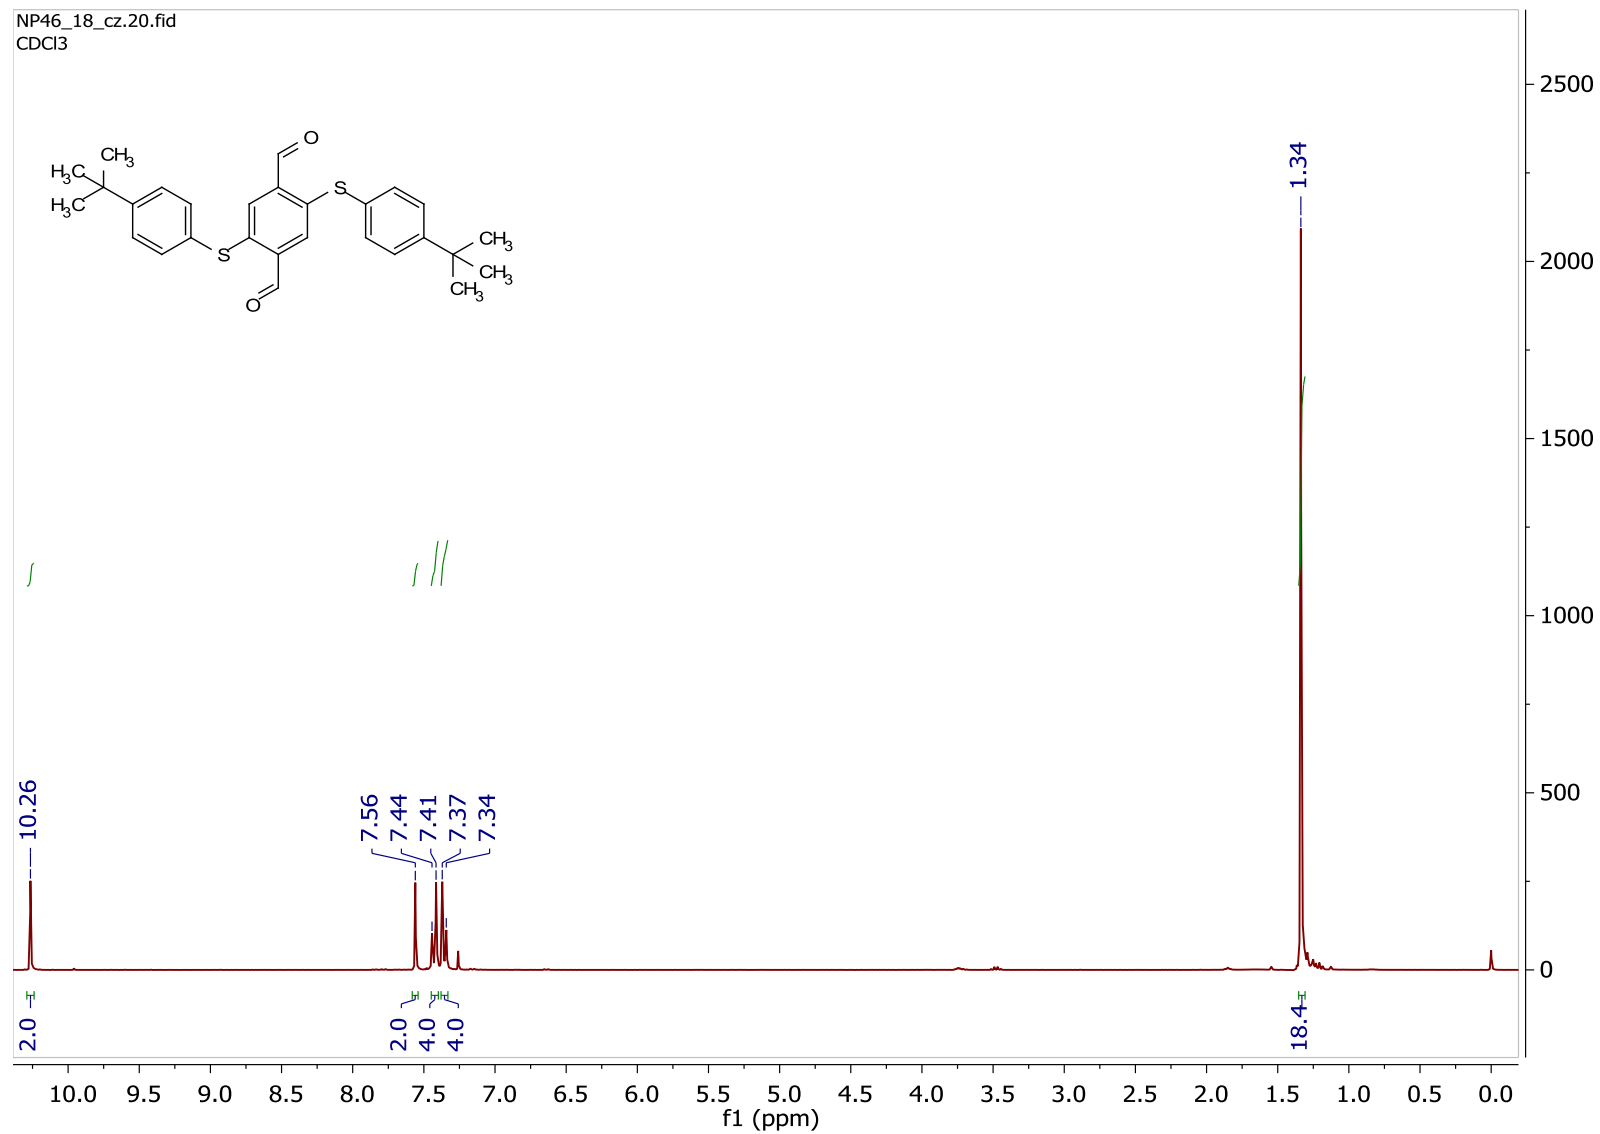

**Figure S135.** Copy of <sup>1</sup>H NMR spectrum (CDCl<sub>3</sub>, 300 MHz, RT) of **5c**.

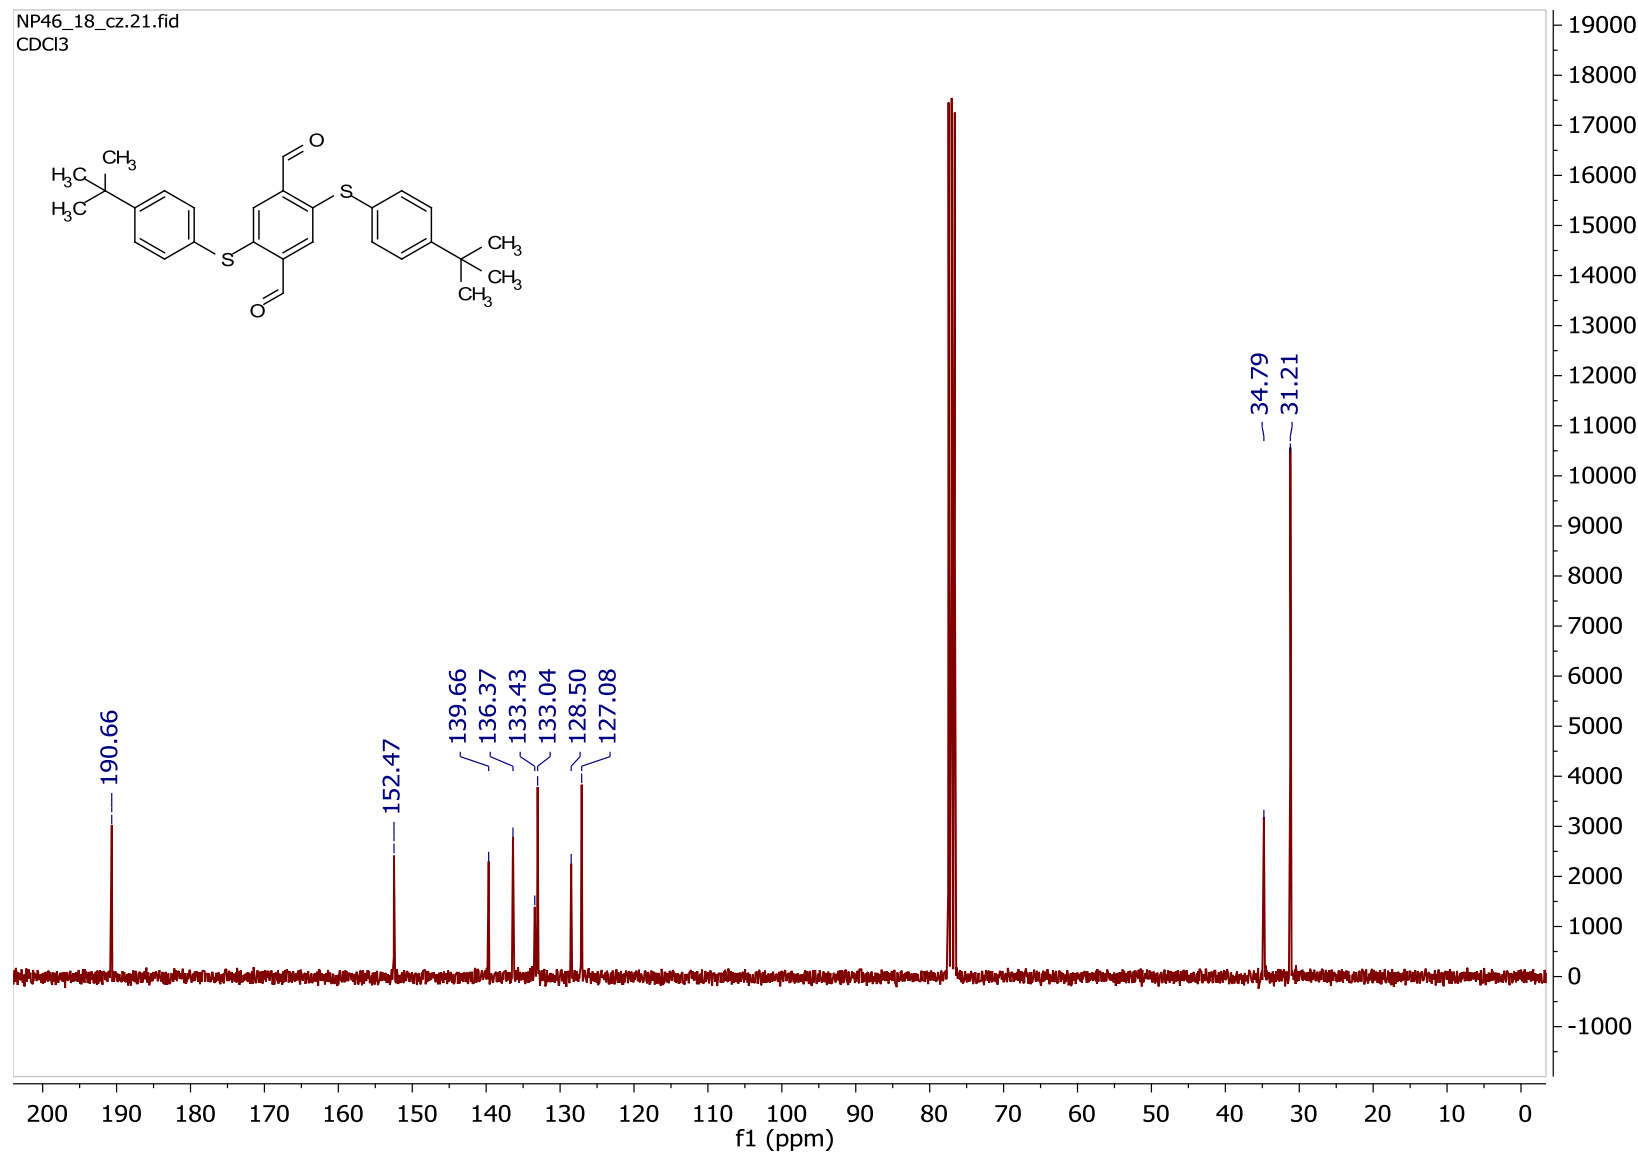

**Figure S136.** Copy of  $^{13}\text{C}\{^1\text{H}\}$  NMR spectrum ( $\text{CDCl}_3$ , 75 MHz, RT) of **5c**.

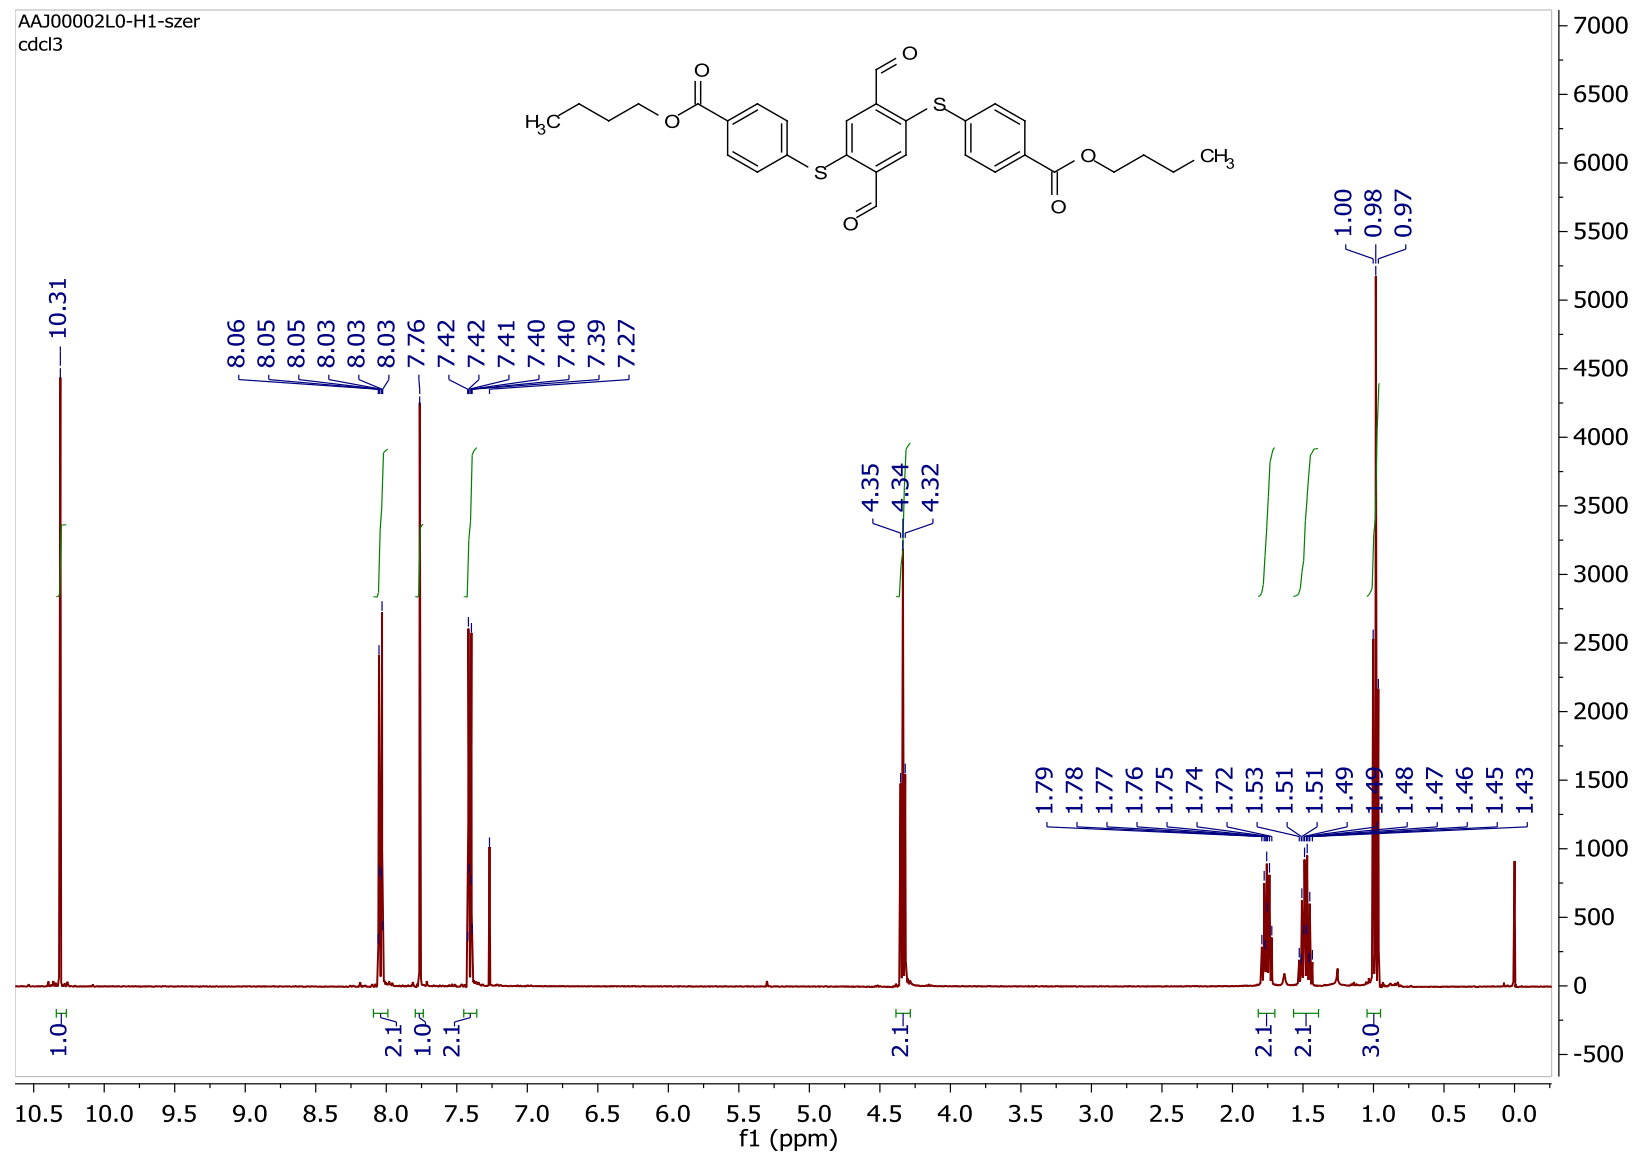

Figure S137. Copy of  $^1\text{H}$  NMR spectrum ( $\text{CDCl}_3$ , 400 MHz, RT) of 5d.

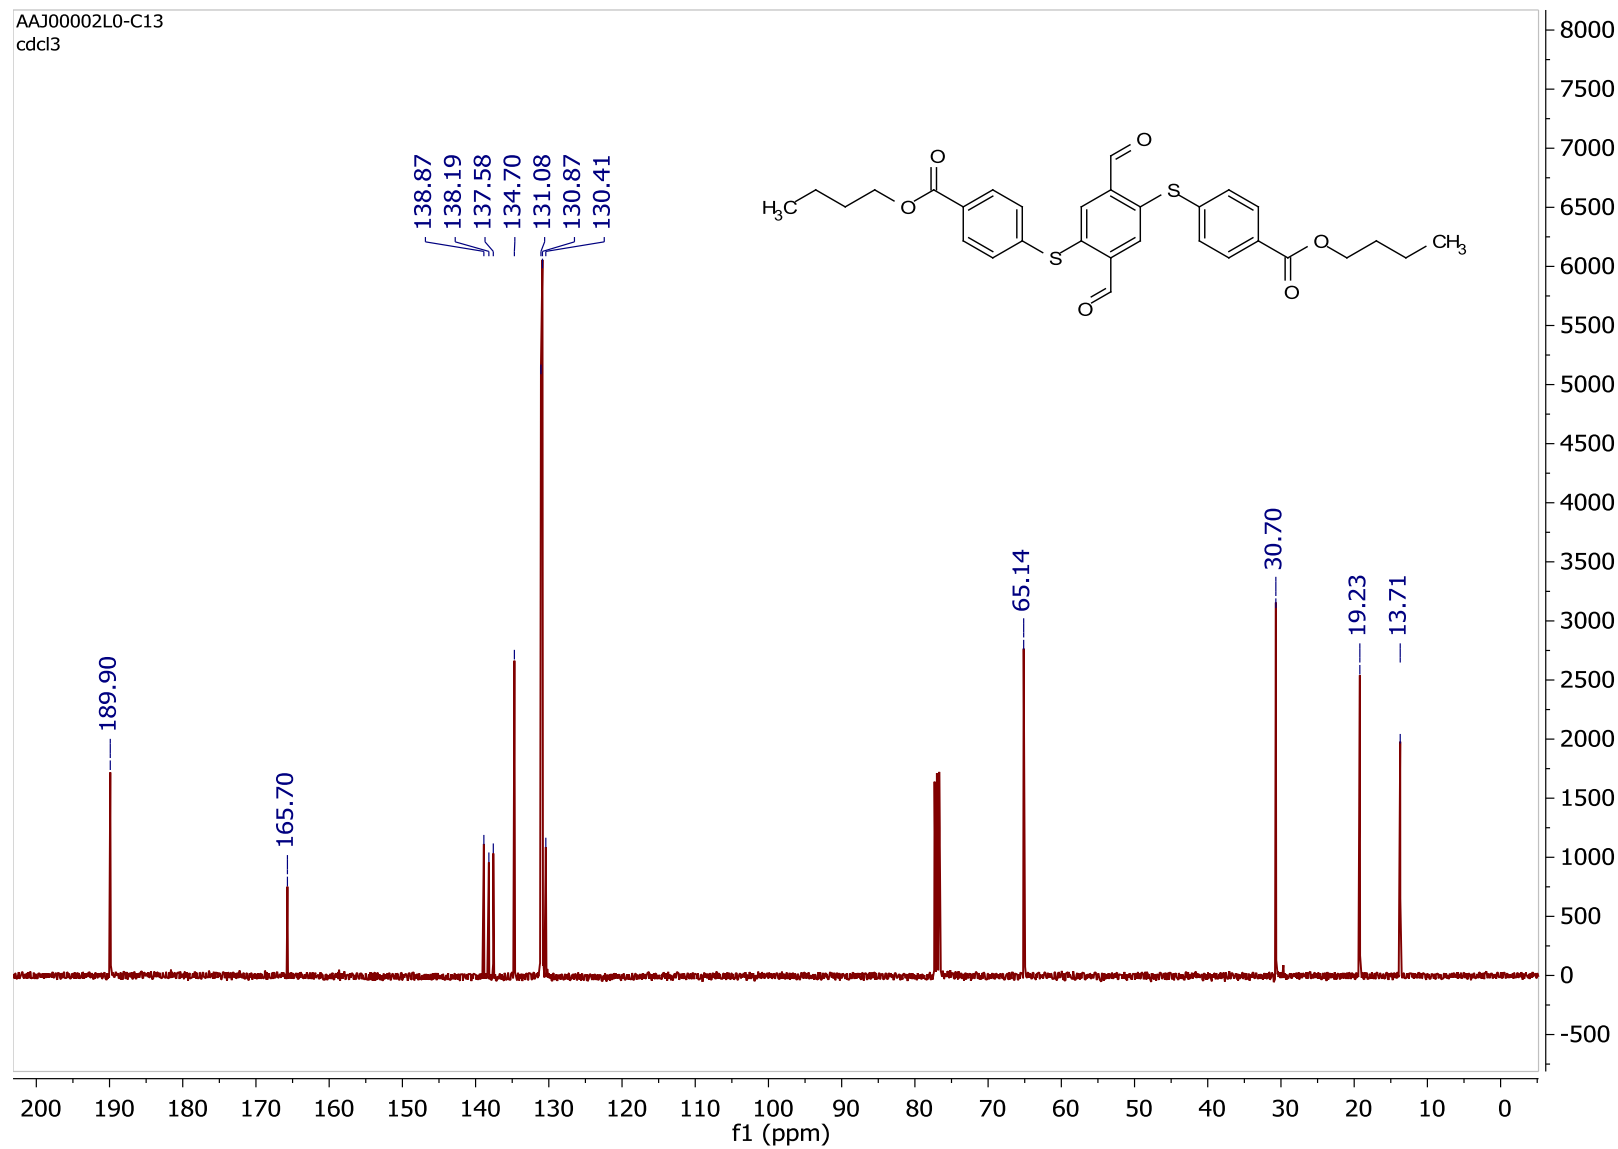

**Figure S138.** Copy of  $^{13}\text{C}\{^1\text{H}\}$  NMR spectrum ( $\text{CDCl}_3$ , 101 MHz, RT) of **5d**.

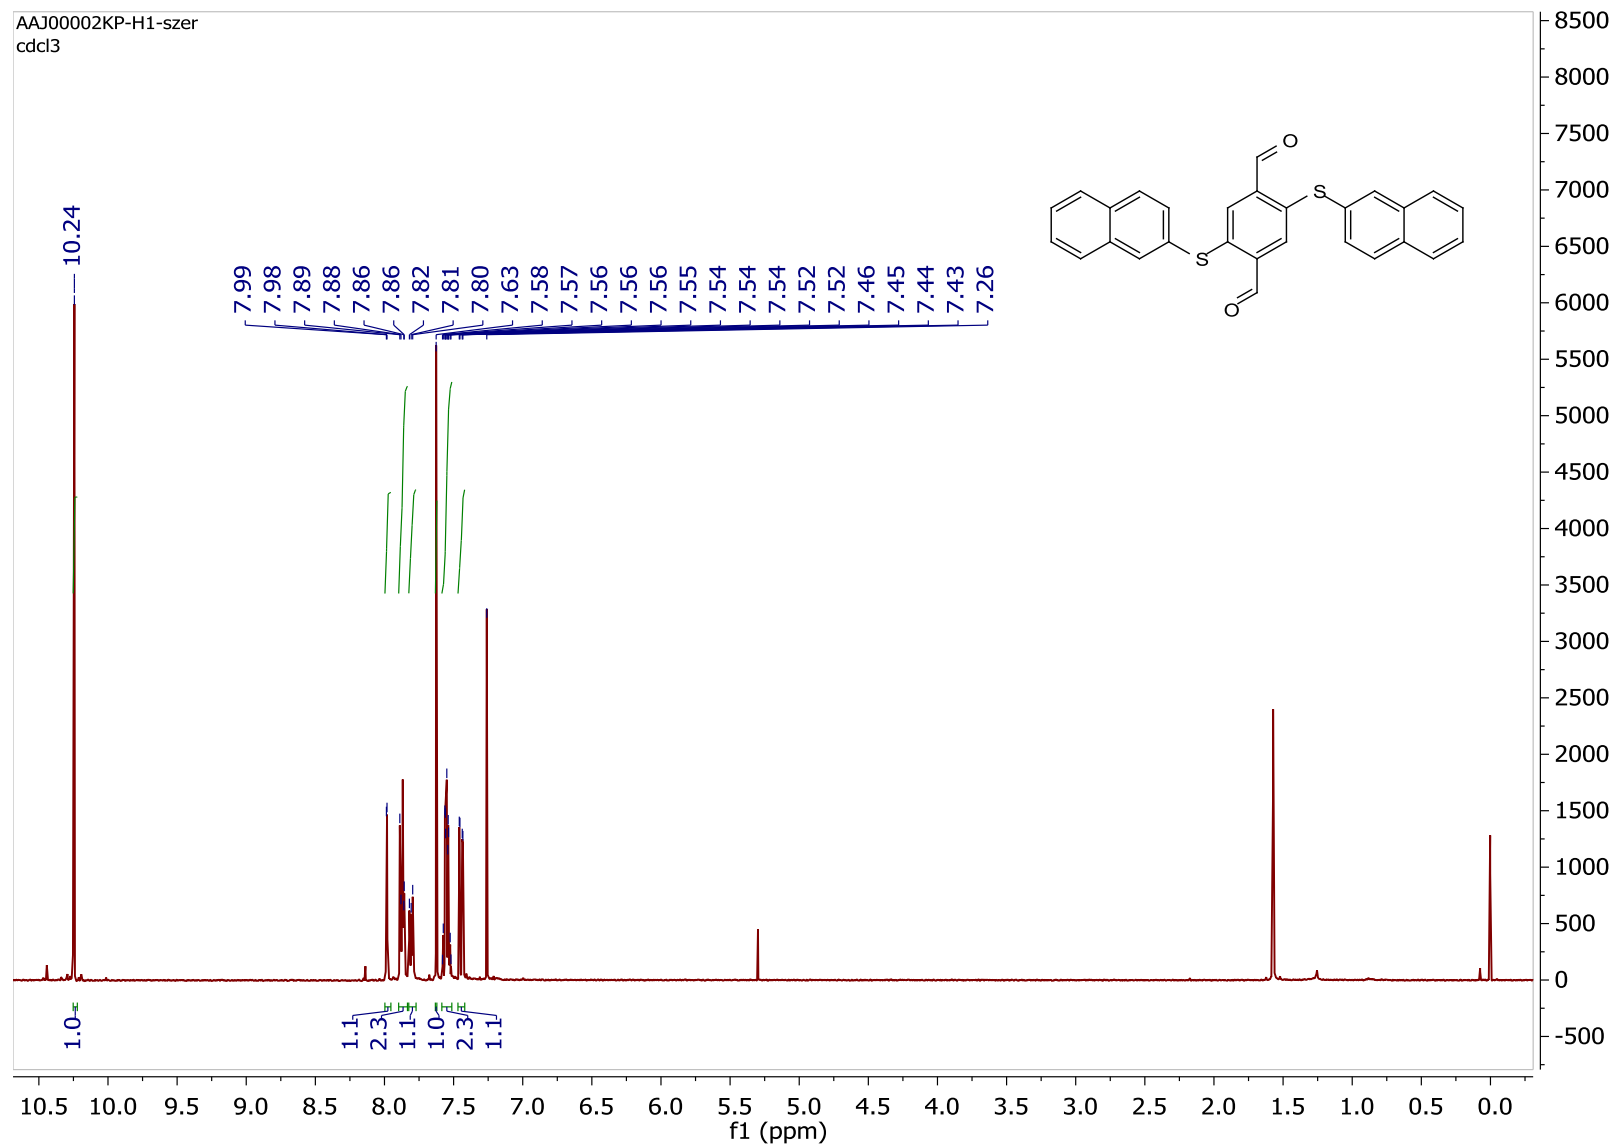

**Figure S139.** Copy of  $^1\text{H}$  NMR spectrum ( $\text{CDCl}_3$ , 400 MHz, RT) of **5e**.



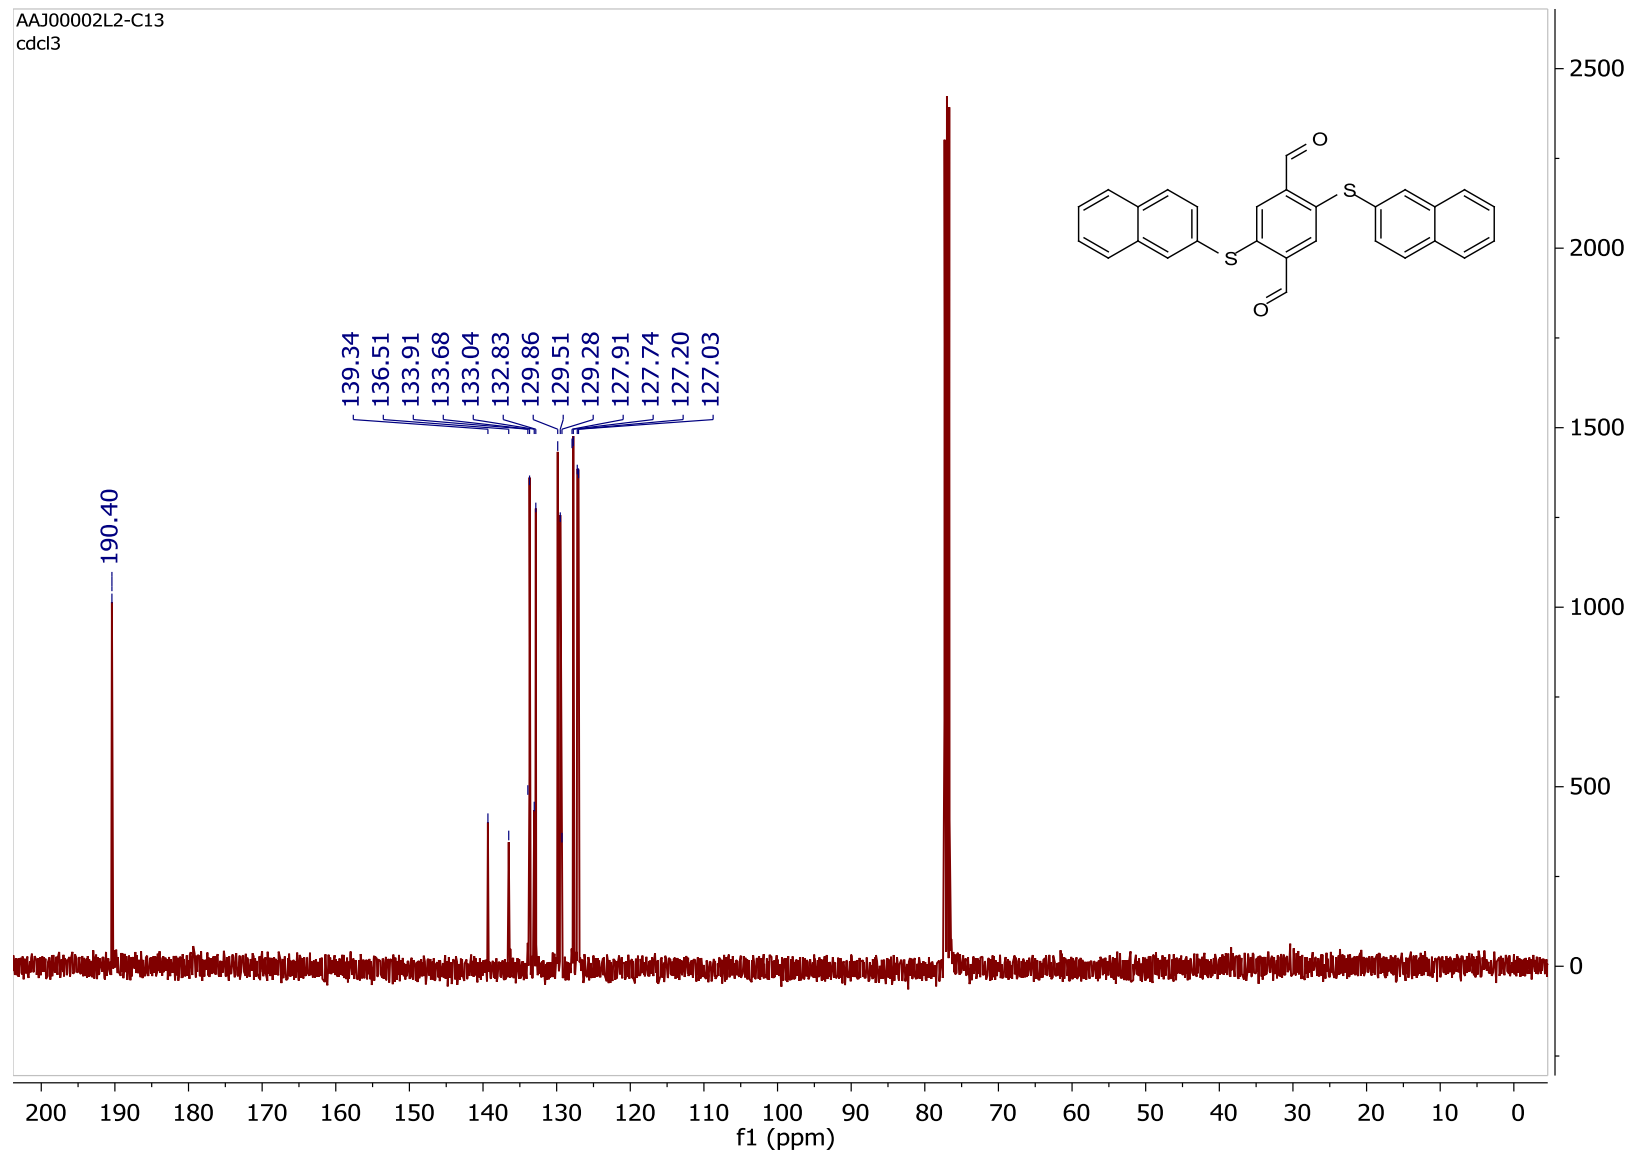

**Figure S140.** Copy of  $^{13}\text{C}\{^1\text{H}\}$  NMR spectrum ( $\text{CDCl}_3$ , 101 MHz, RT) of **5e**.

NP28\_22\_kol\_AAJ0000393.1.fid  
NP28\_22\_kol  
temp 298K

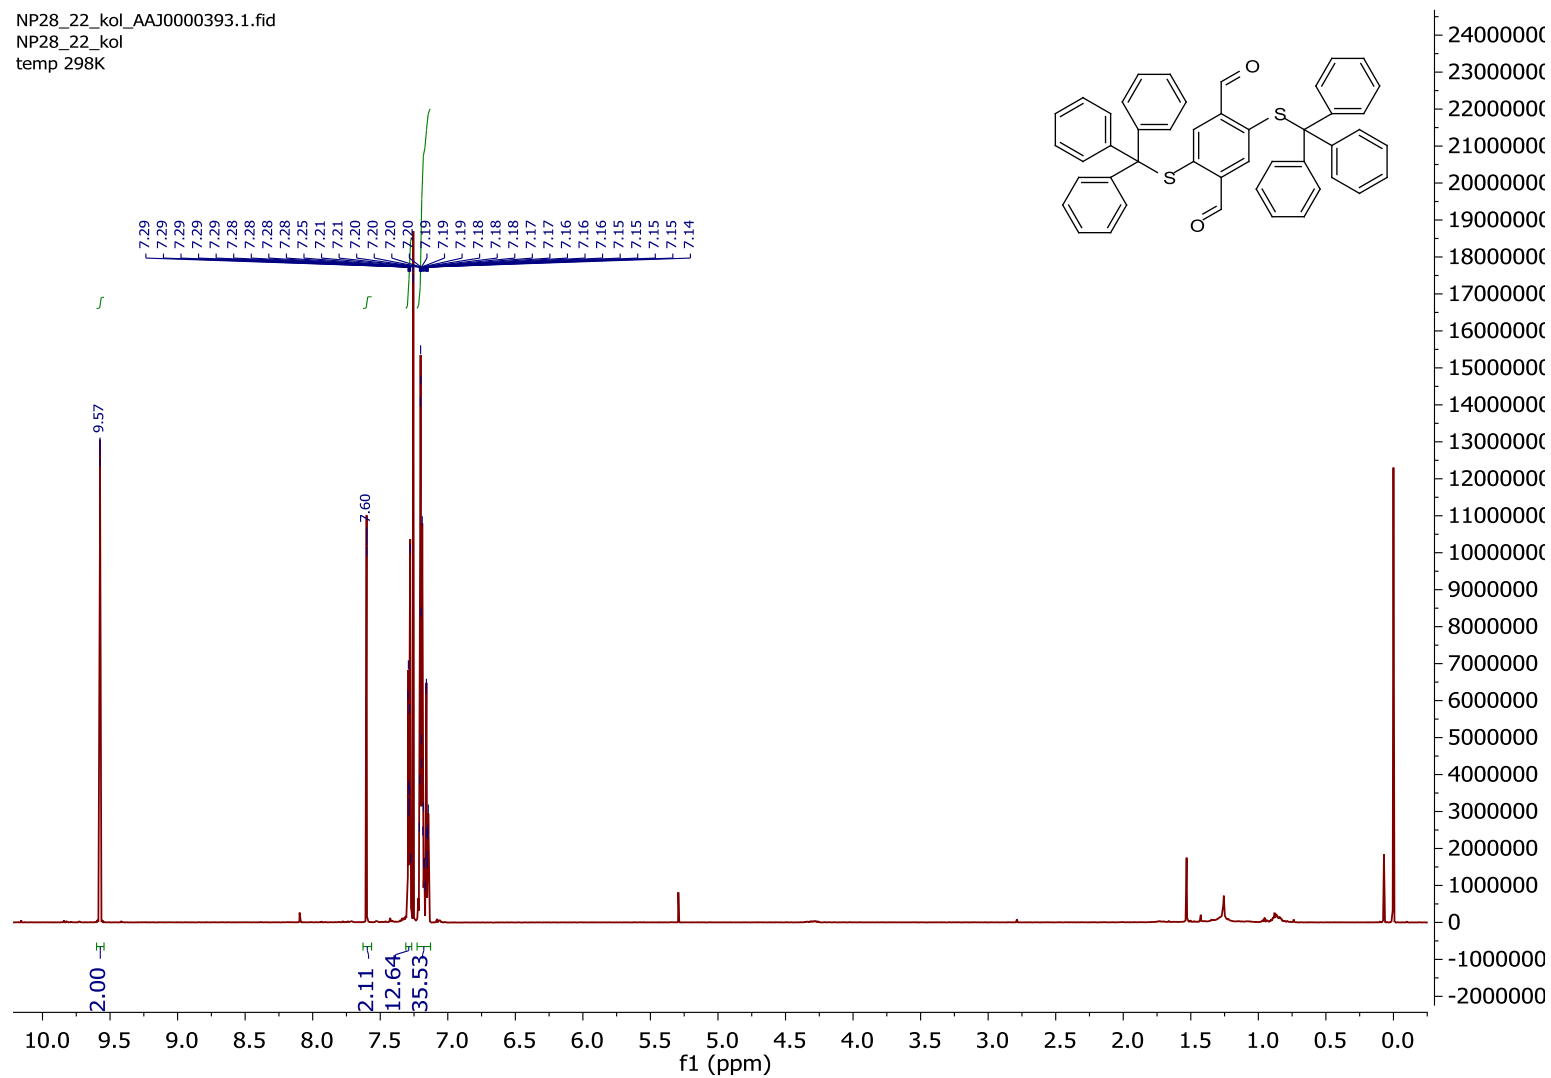

**Figure S141.** Copy of  $^1\text{H}$  NMR spectrum ( $\text{CDCl}_3$ , 600 MHz, RT) of **5f**.

NP28\_22\_kol\_AAJ0000393.4.fid  
NP28\_22\_kol  
temp 298K

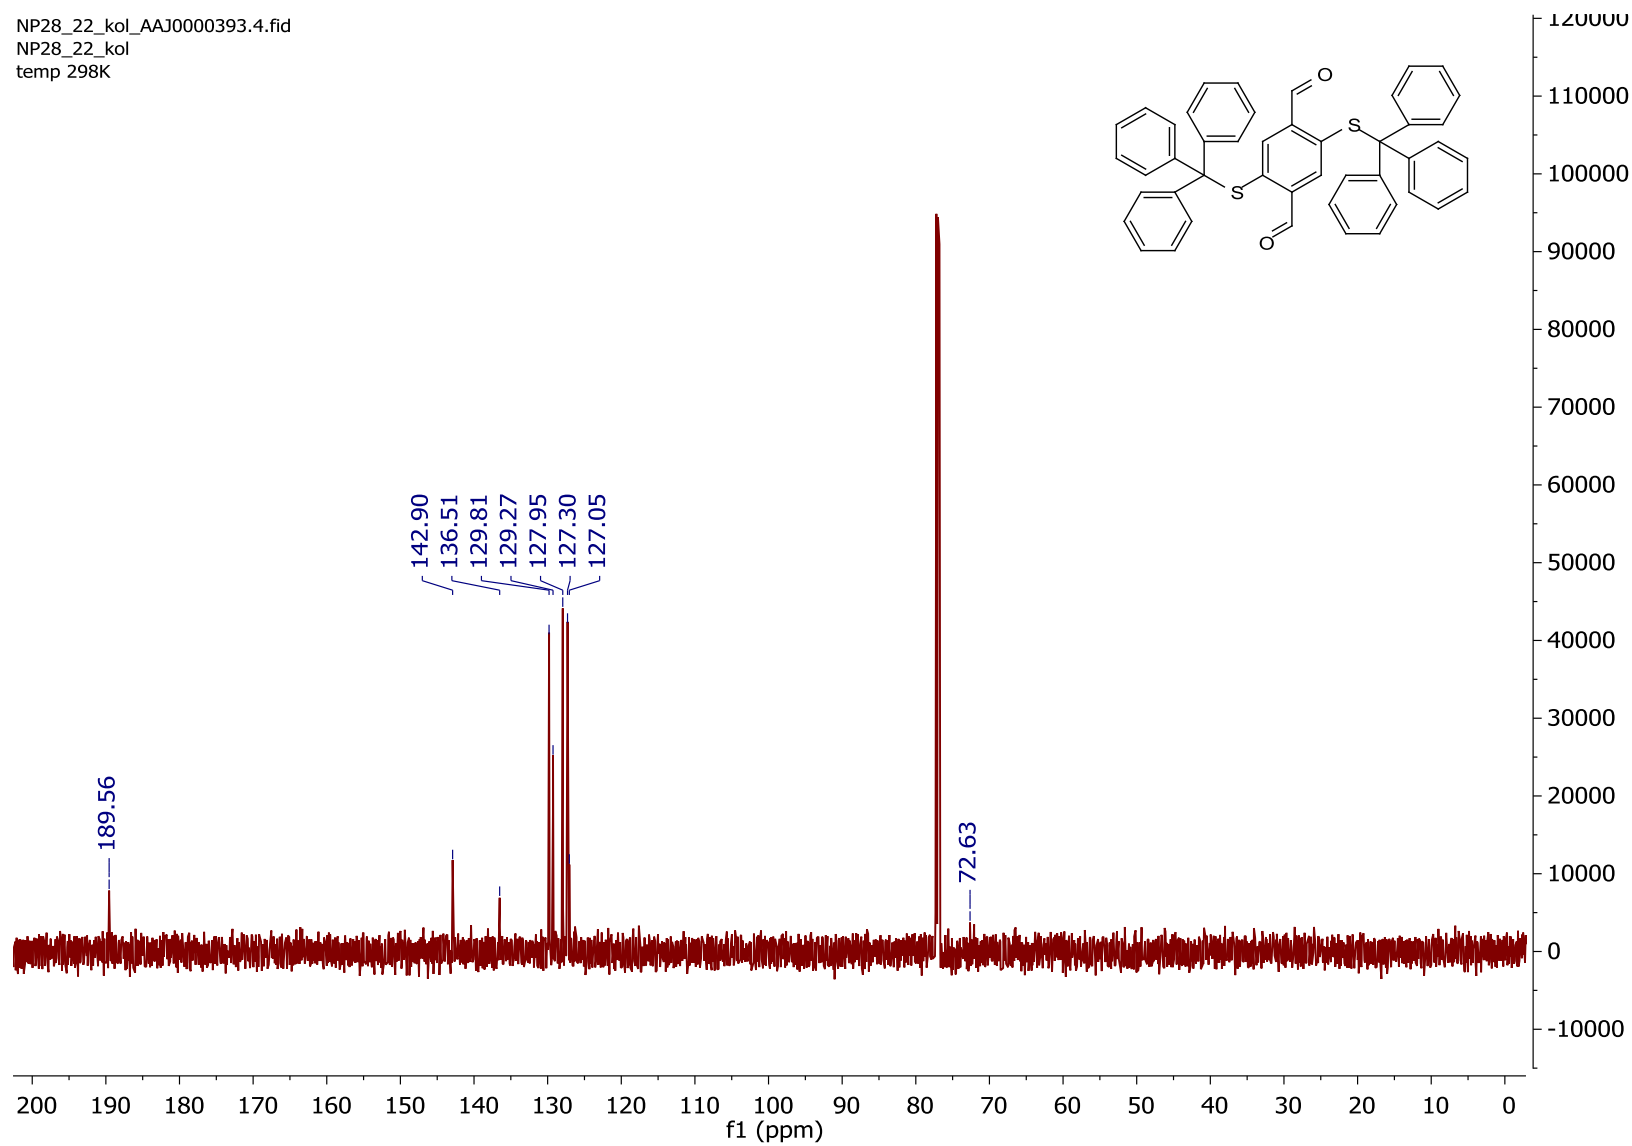

**Figure S142.** Copy of  $^{13}\text{C}\{^1\text{H}\}$  NMR spectrum ( $\text{CDCl}_3$ , 151 MHz, RT) of **5f**.

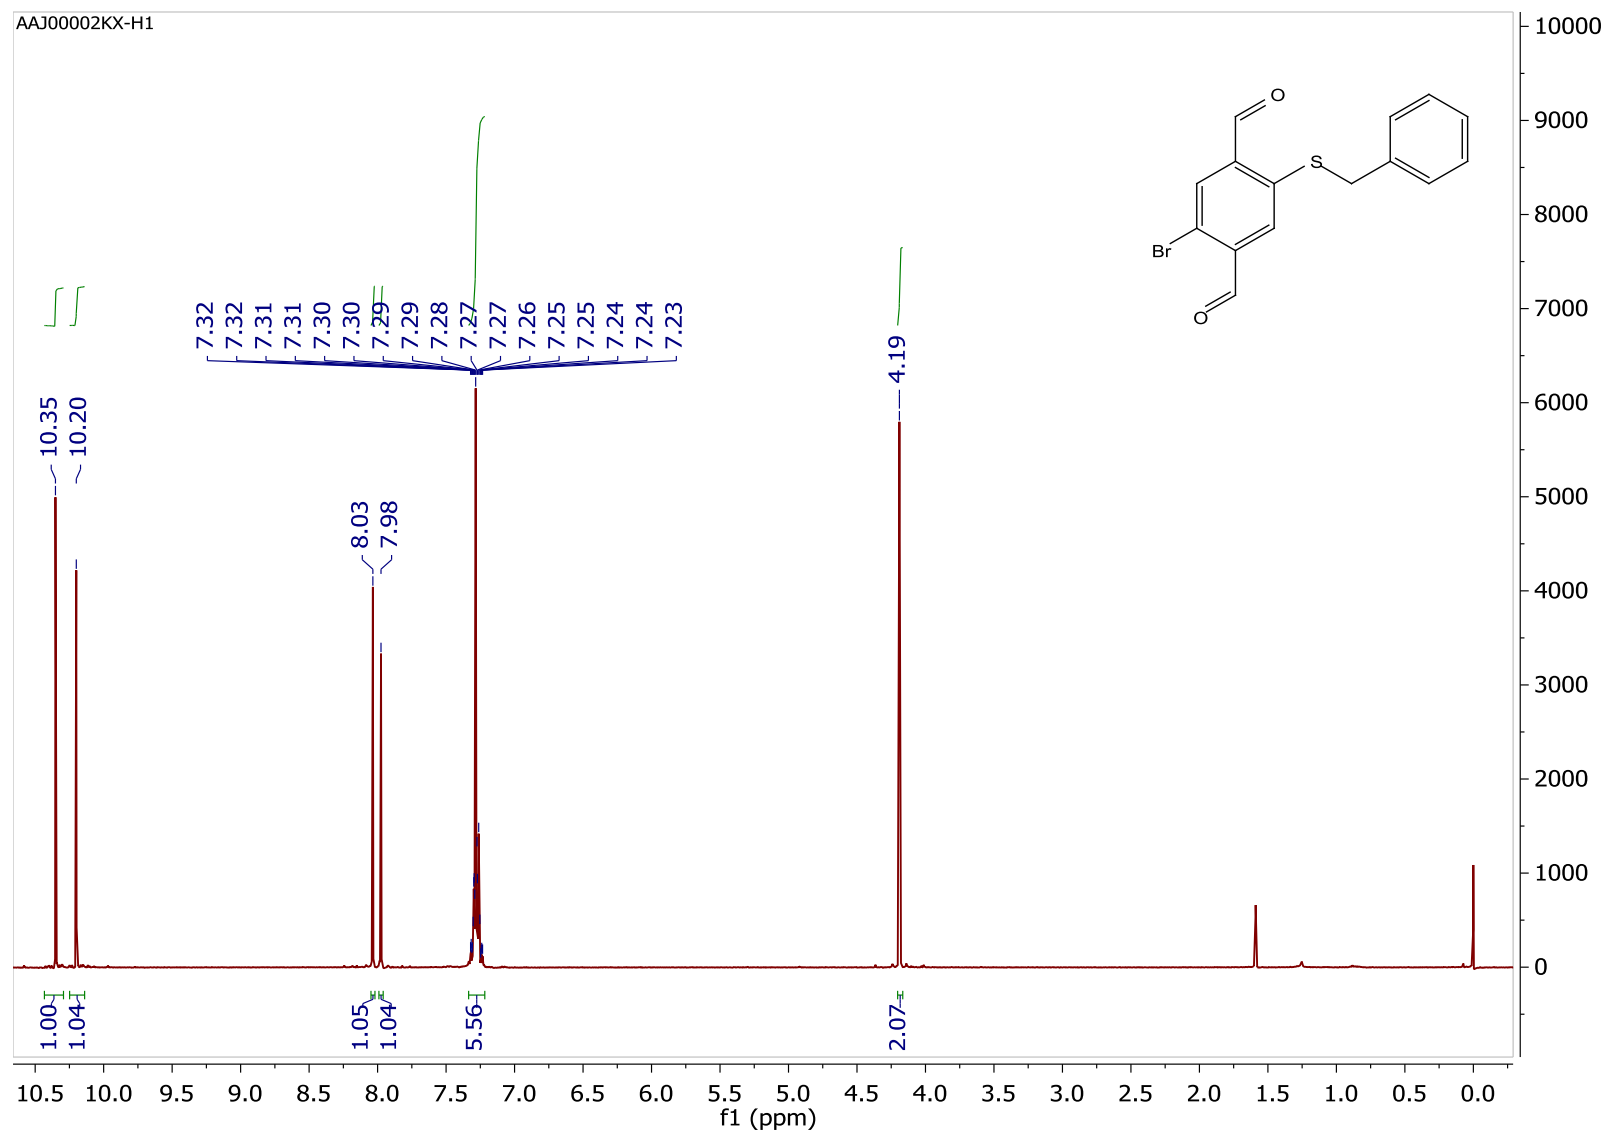

**Figure S143.** Copy of  $^1\text{H}$  NMR spectrum ( $\text{CDCl}_3$ , 400 MHz, RT) of **5g**.

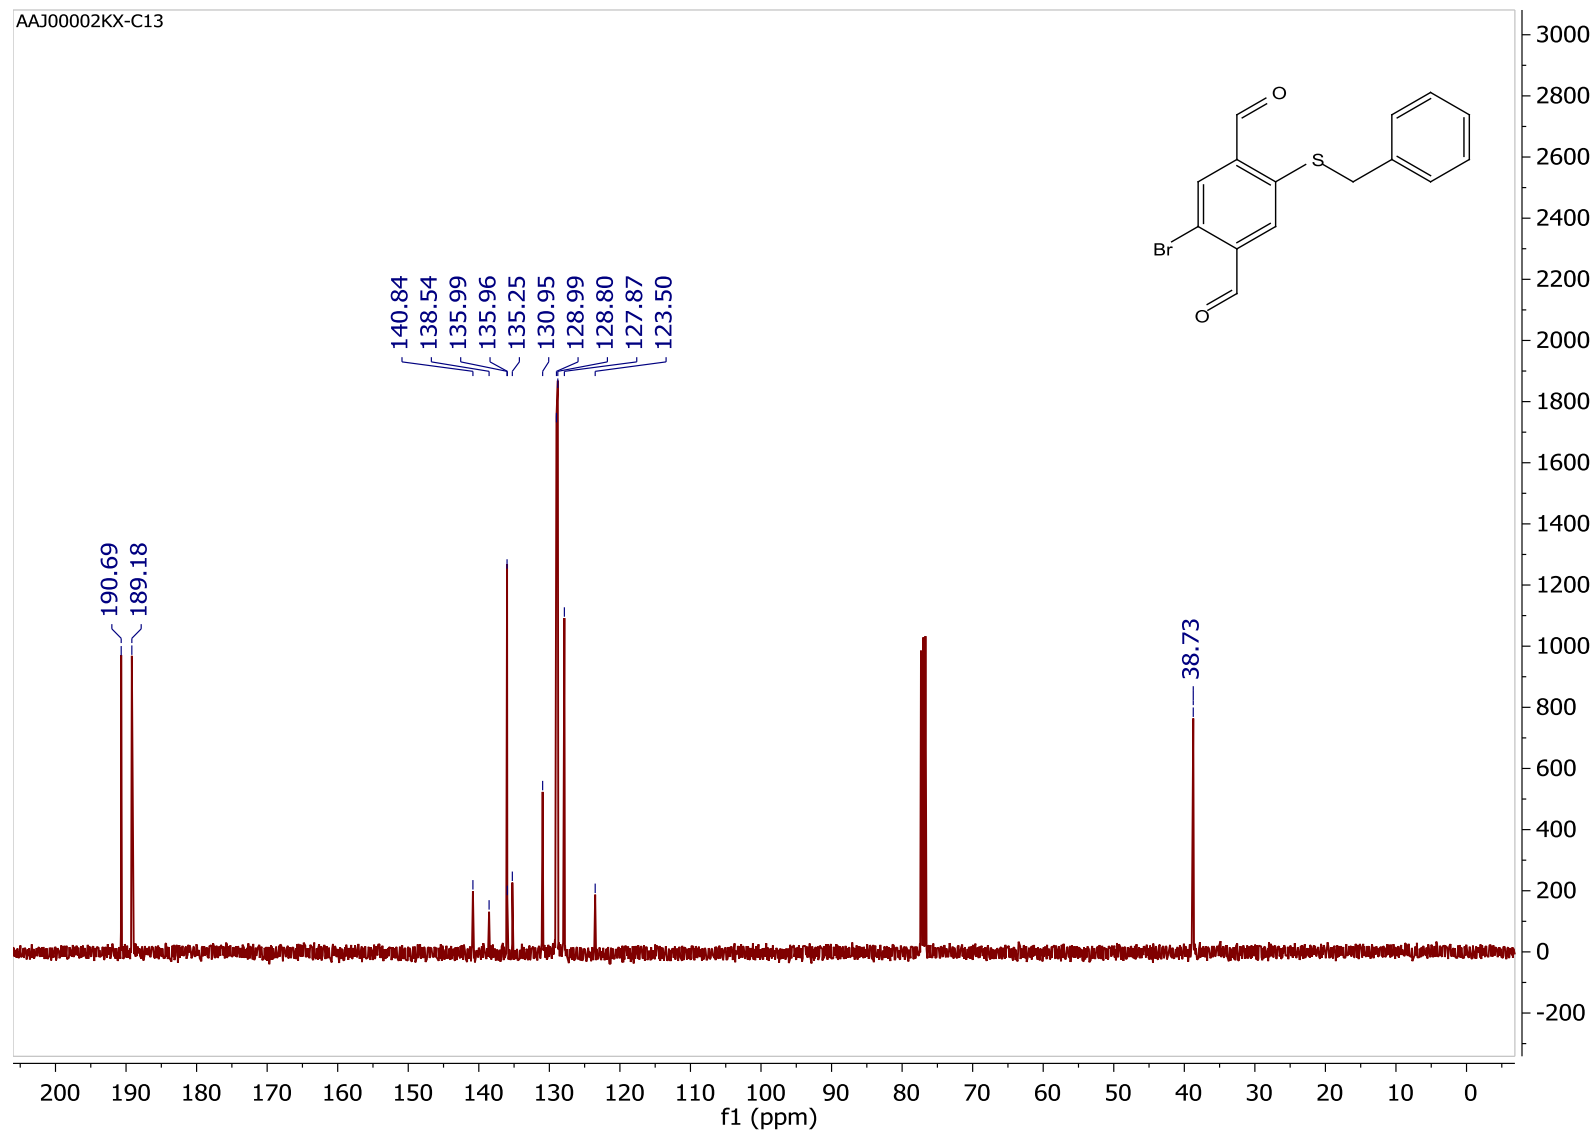

**Figure S144.** Copy of  $^{13}\text{C}\{^1\text{H}\}$  NMR spectrum ( $\text{CDCl}_3$ , 101 MHz, RT) of **5g**.



NP53\_22\_AAJ00003D6.1.fid  
NP53\_22  
temp 298K

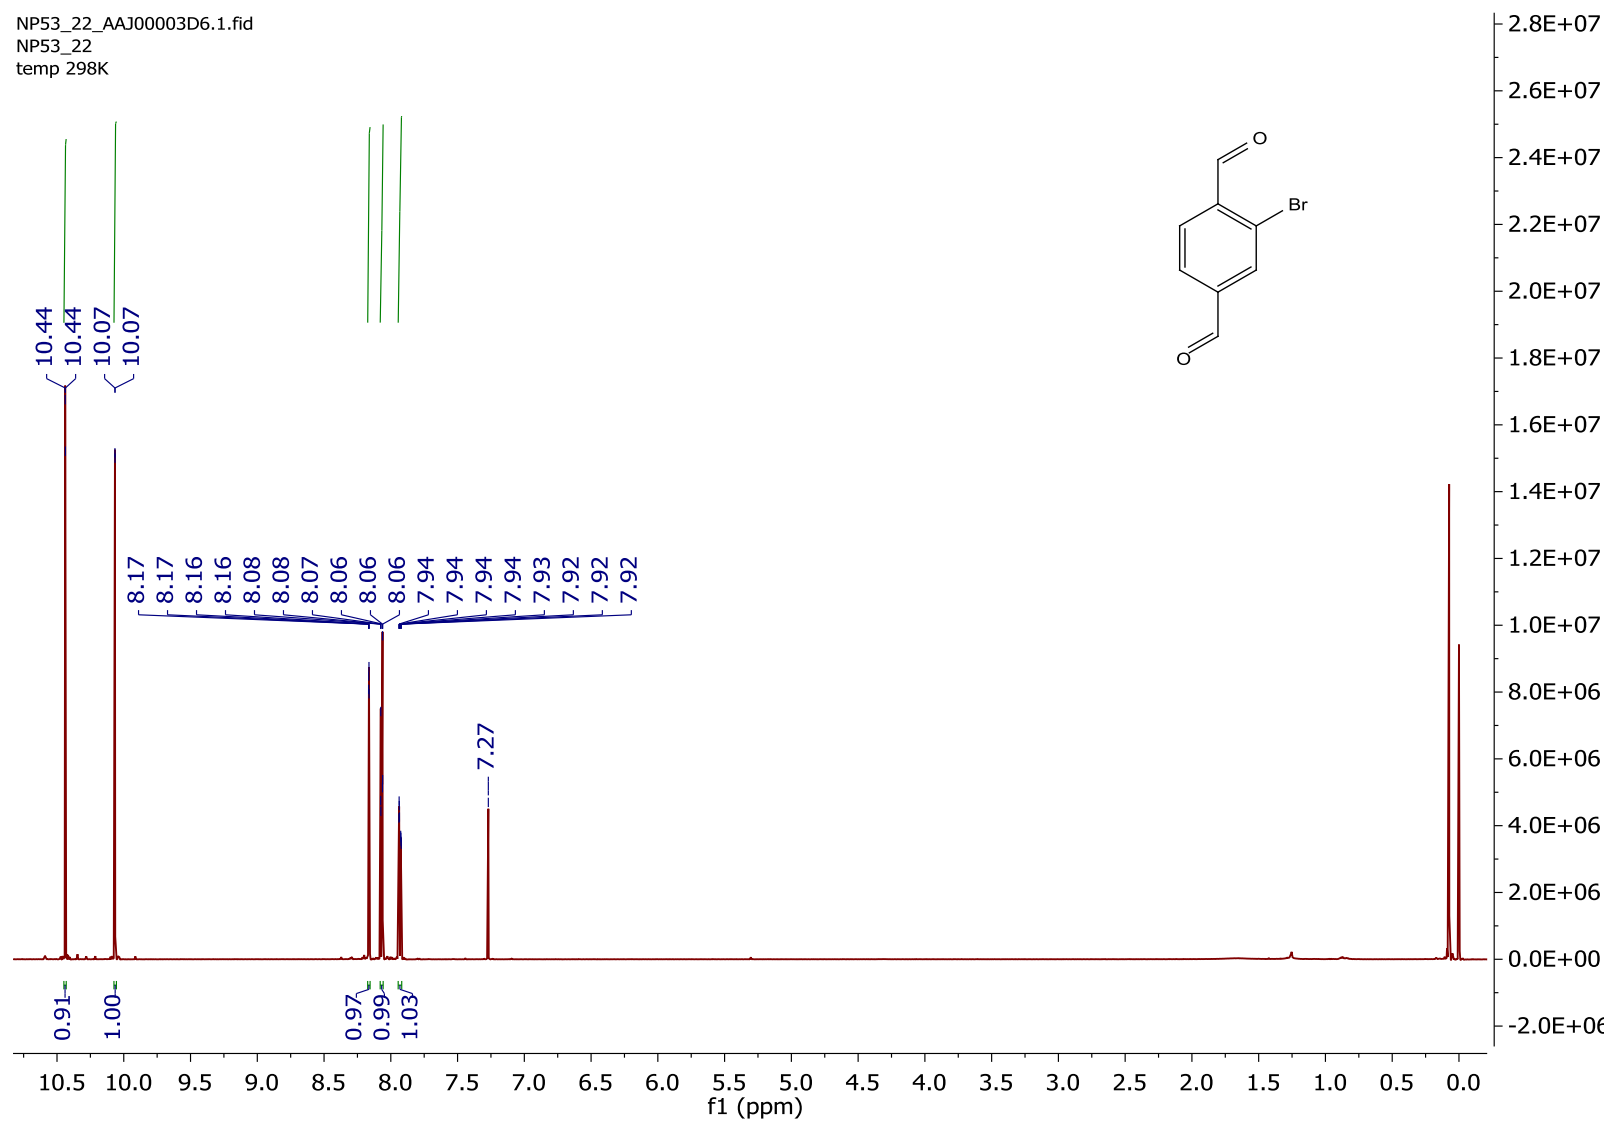

Figure S145. Copy of  $^1\text{H}$  NMR spectrum ( $\text{CDCl}_3$ , 600 MHz, RT) of 5h.

NP53\_22\_AAJ00003D6.2.fid  
NP53\_22  
temp 298K

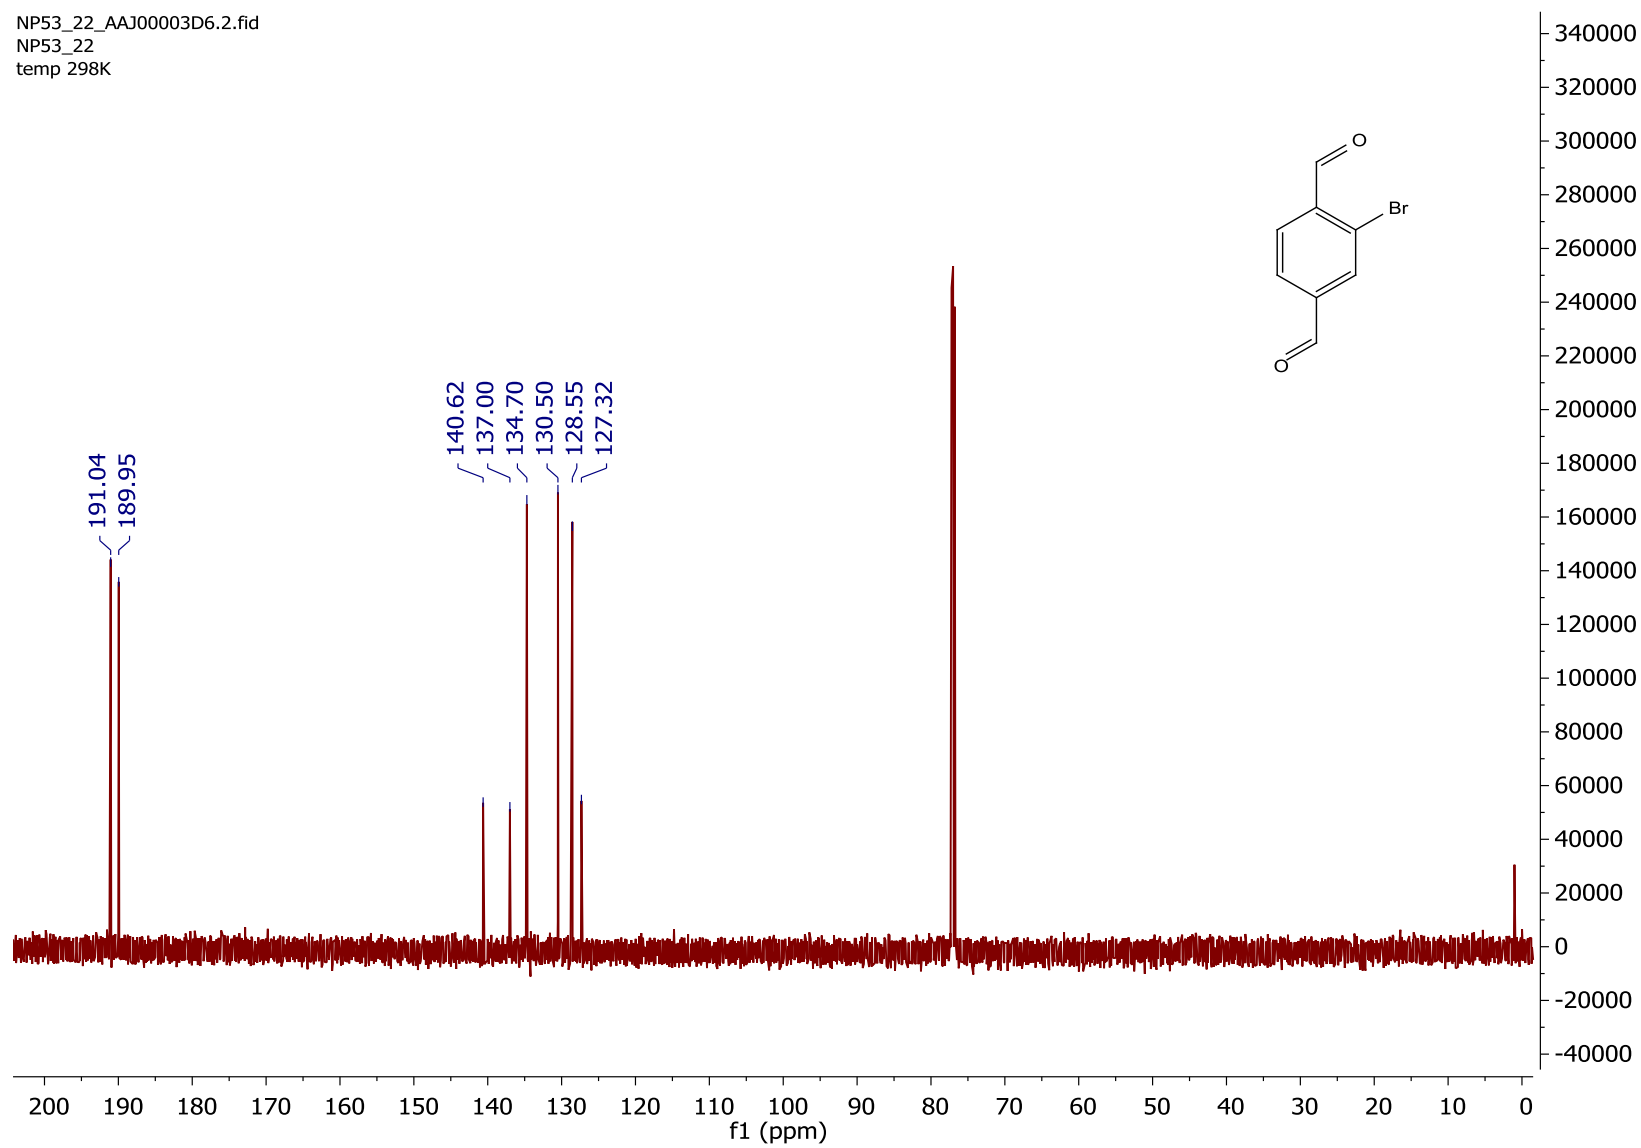

**Figure S146.** Copy of  $^{13}\text{C}\{^1\text{H}\}$  NMR spectrum ( $\text{CDCl}_3$ , 151 MHz, RT) of **5h**.

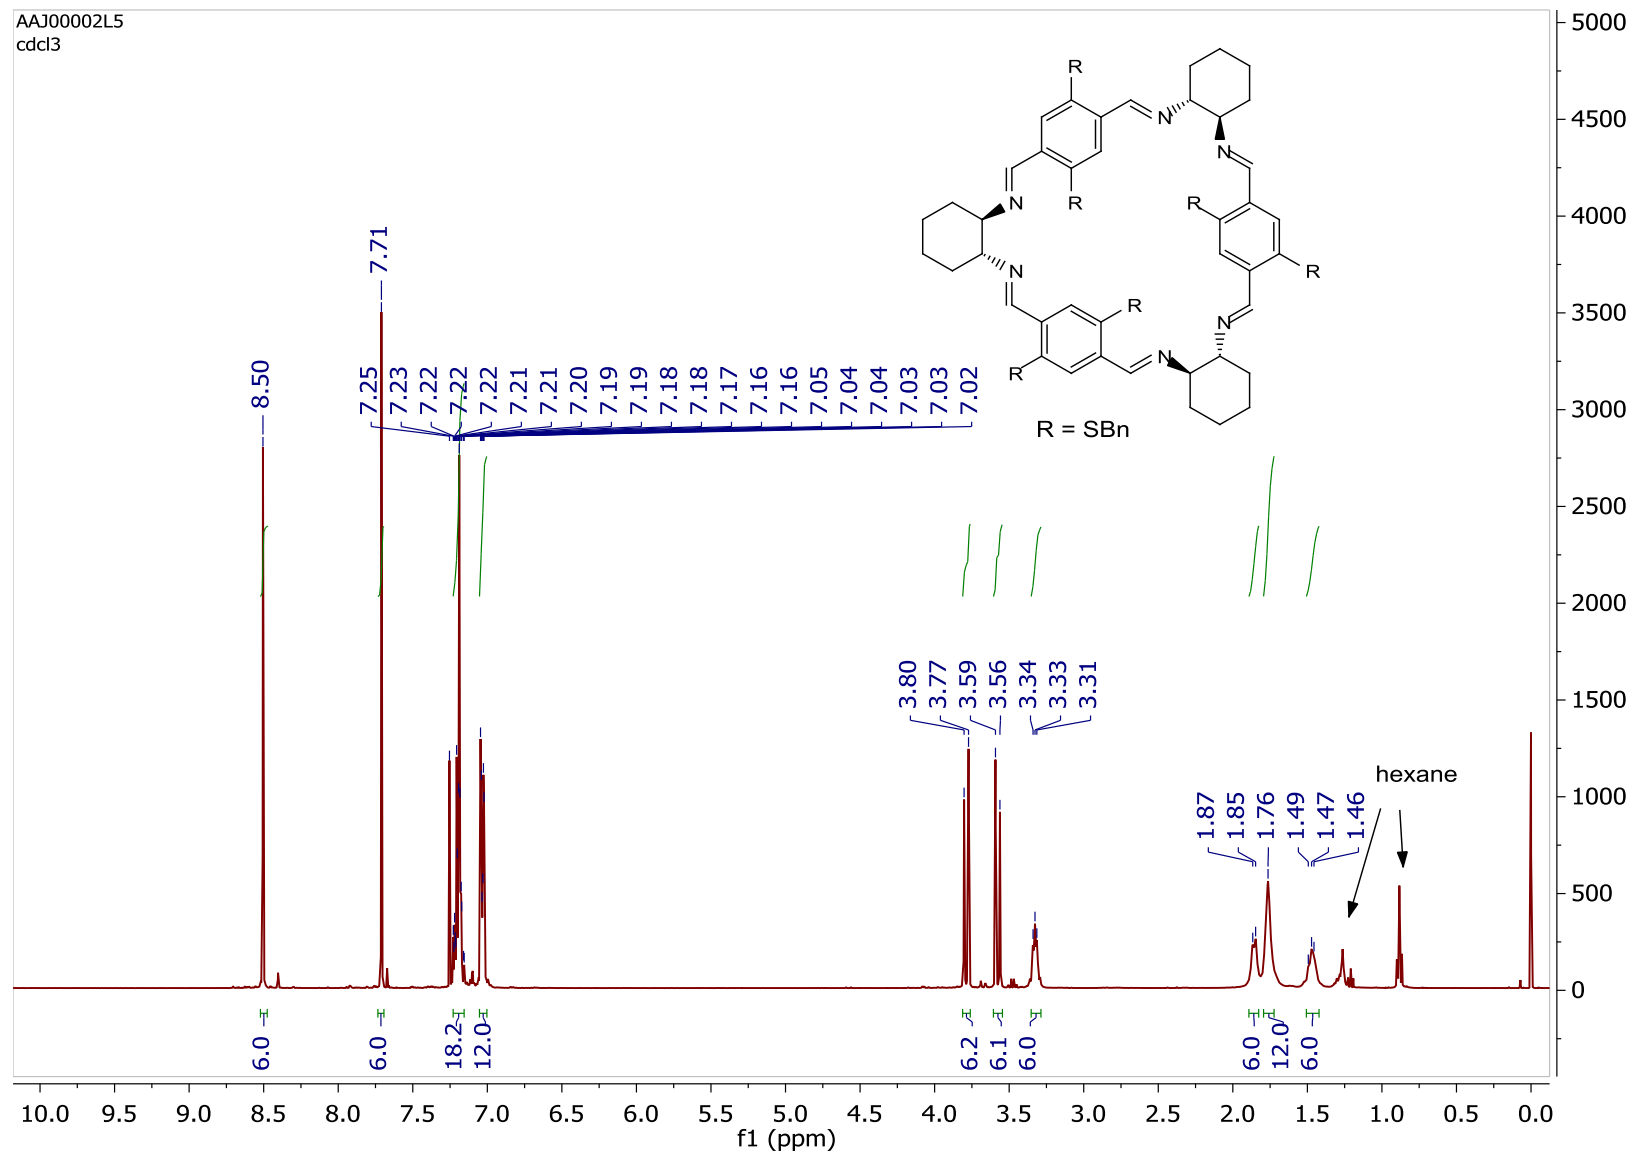

**Figure S147.** Copy of  $^1\text{H}$  NMR spectrum ( $\text{CDCl}_3$ , 400 MHz, RT) of **6a**.

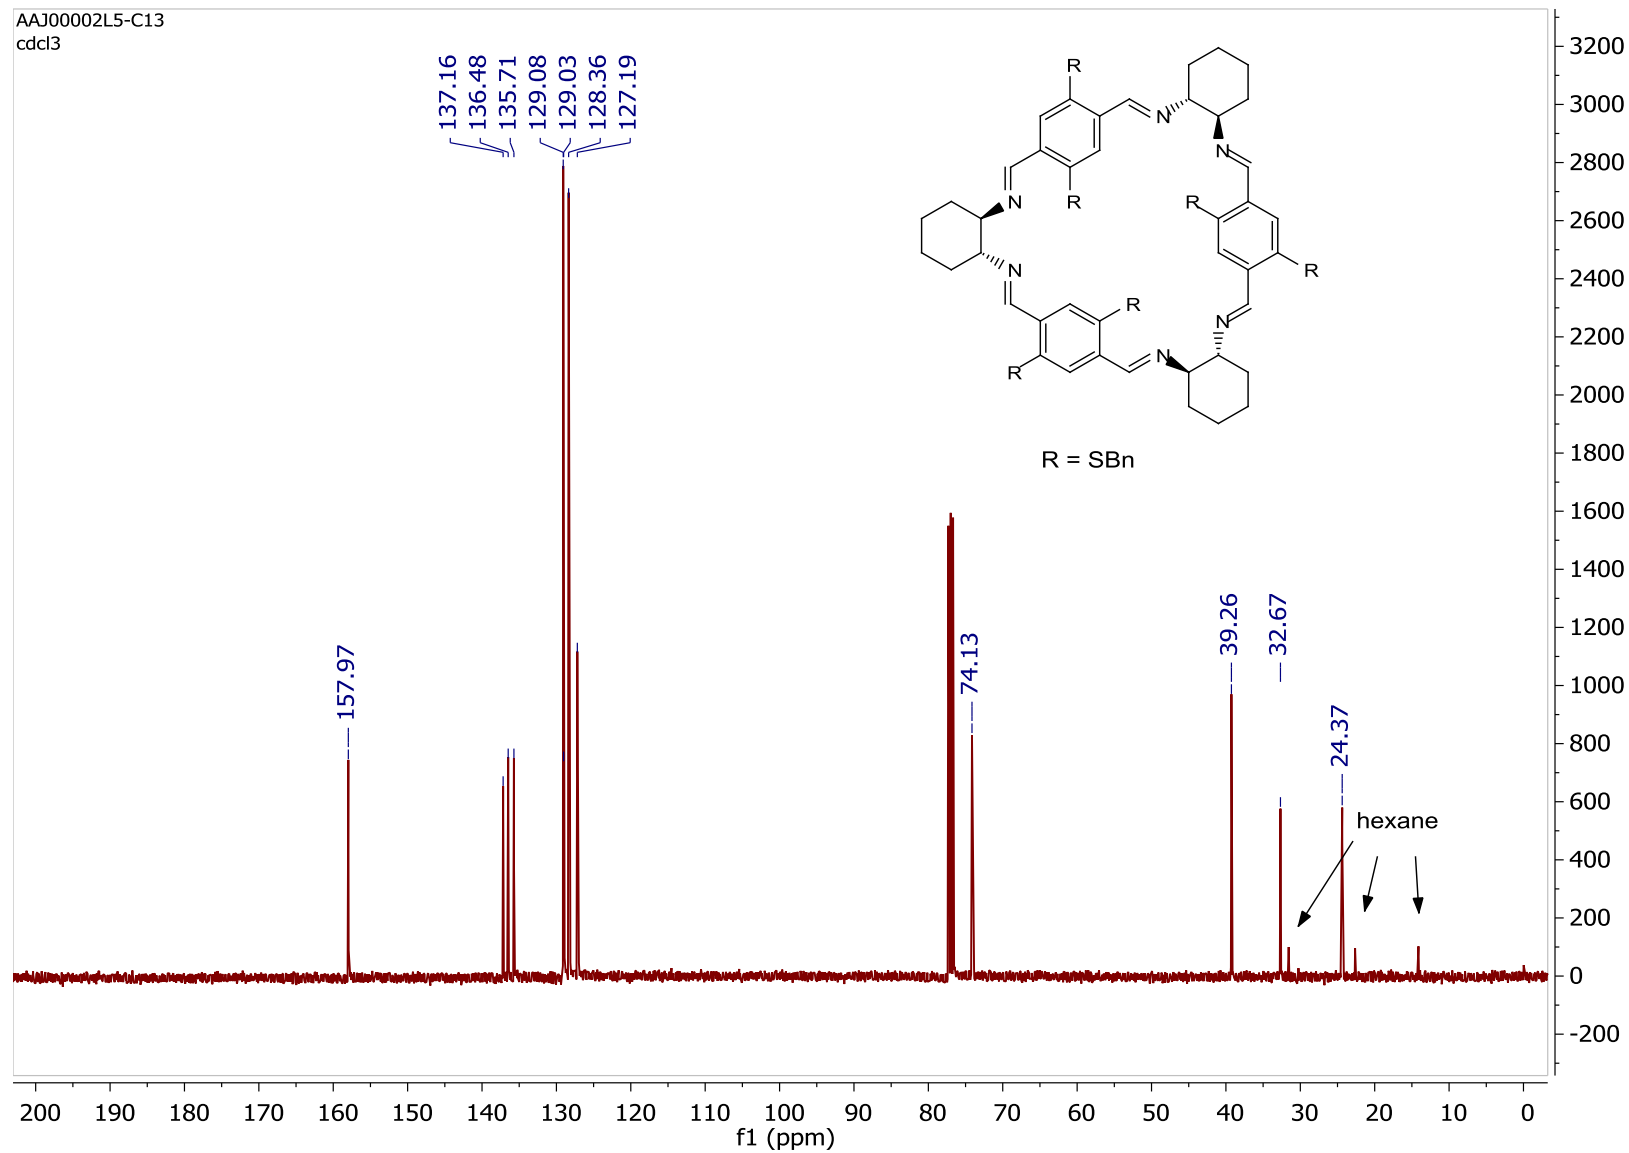

**Figure S148.** Copy of  $^{13}\text{C}\{^1\text{H}\}$  NMR spectrum (CDCl<sub>3</sub>, 101 MHz, RT) of **6a**.

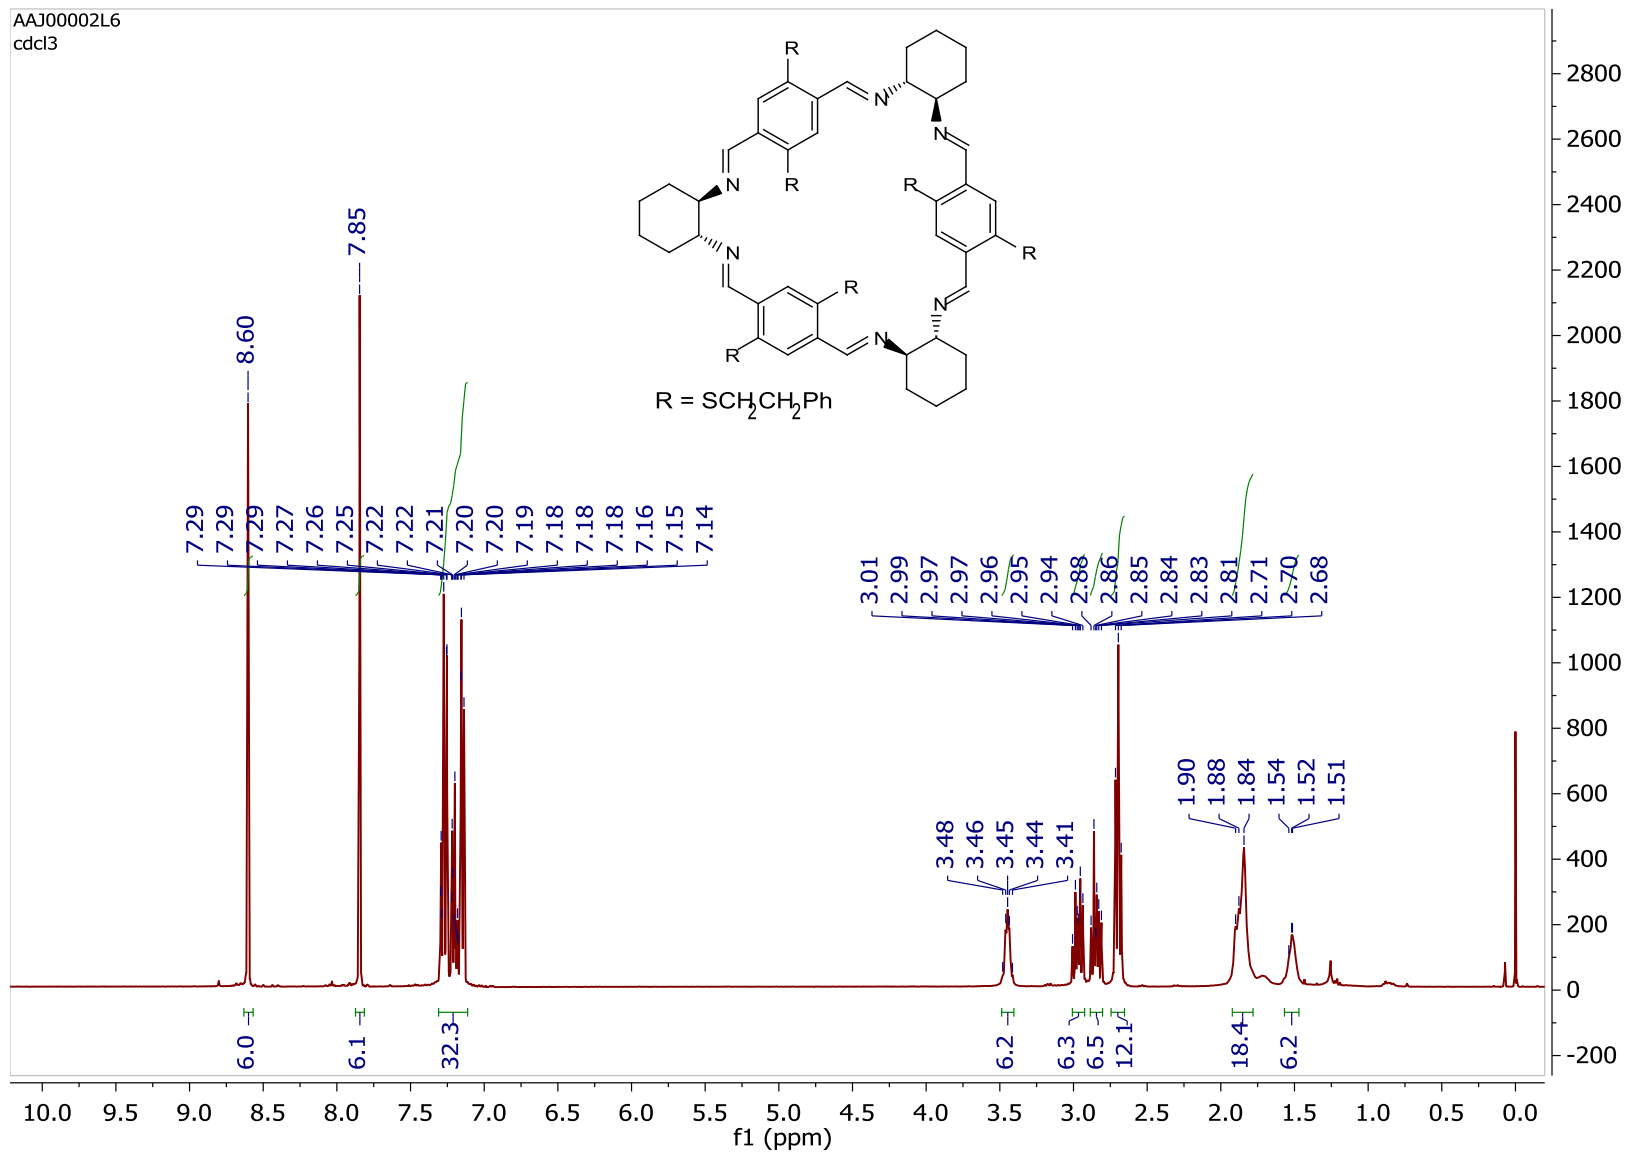

**Figure S149.** Copy of  $^1\text{H}$  NMR spectrum (CDCl<sub>3</sub>, 400 MHz, RT) of **6b**.



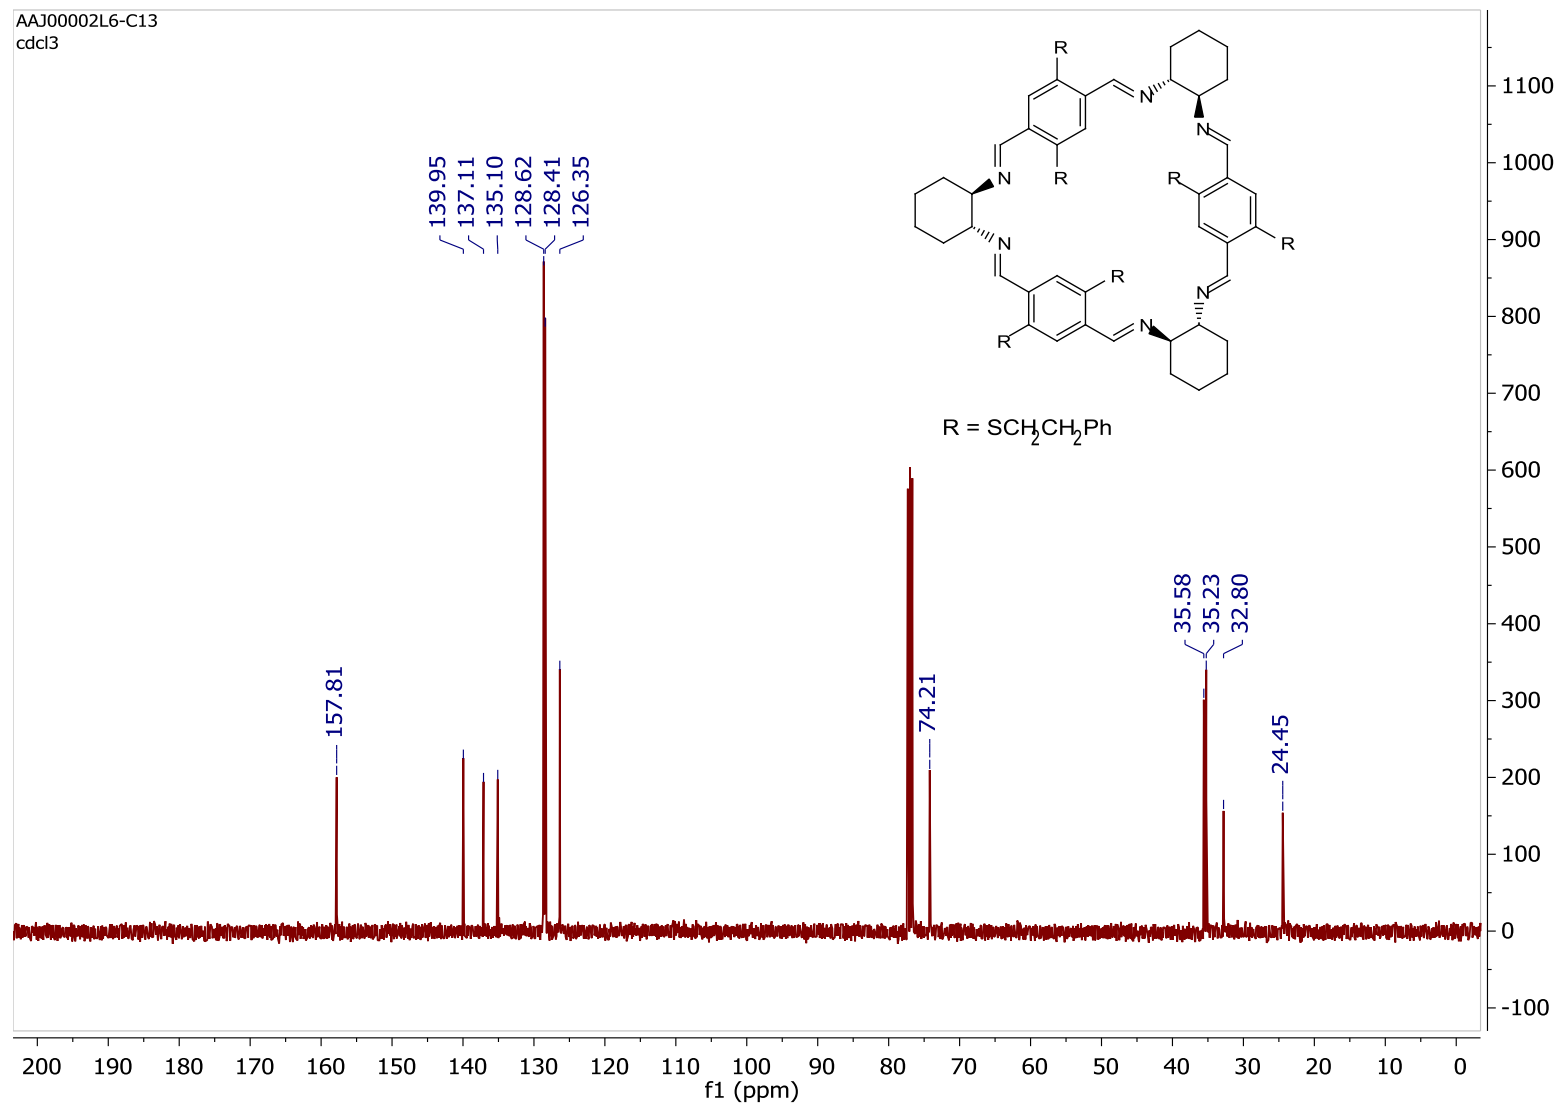

**Figure S150.** Copy of  $^{13}\text{C}\{^1\text{H}\}$  NMR spectrum ( $\text{CDCl}_3$ , 101 MHz, RT) of **6b**.

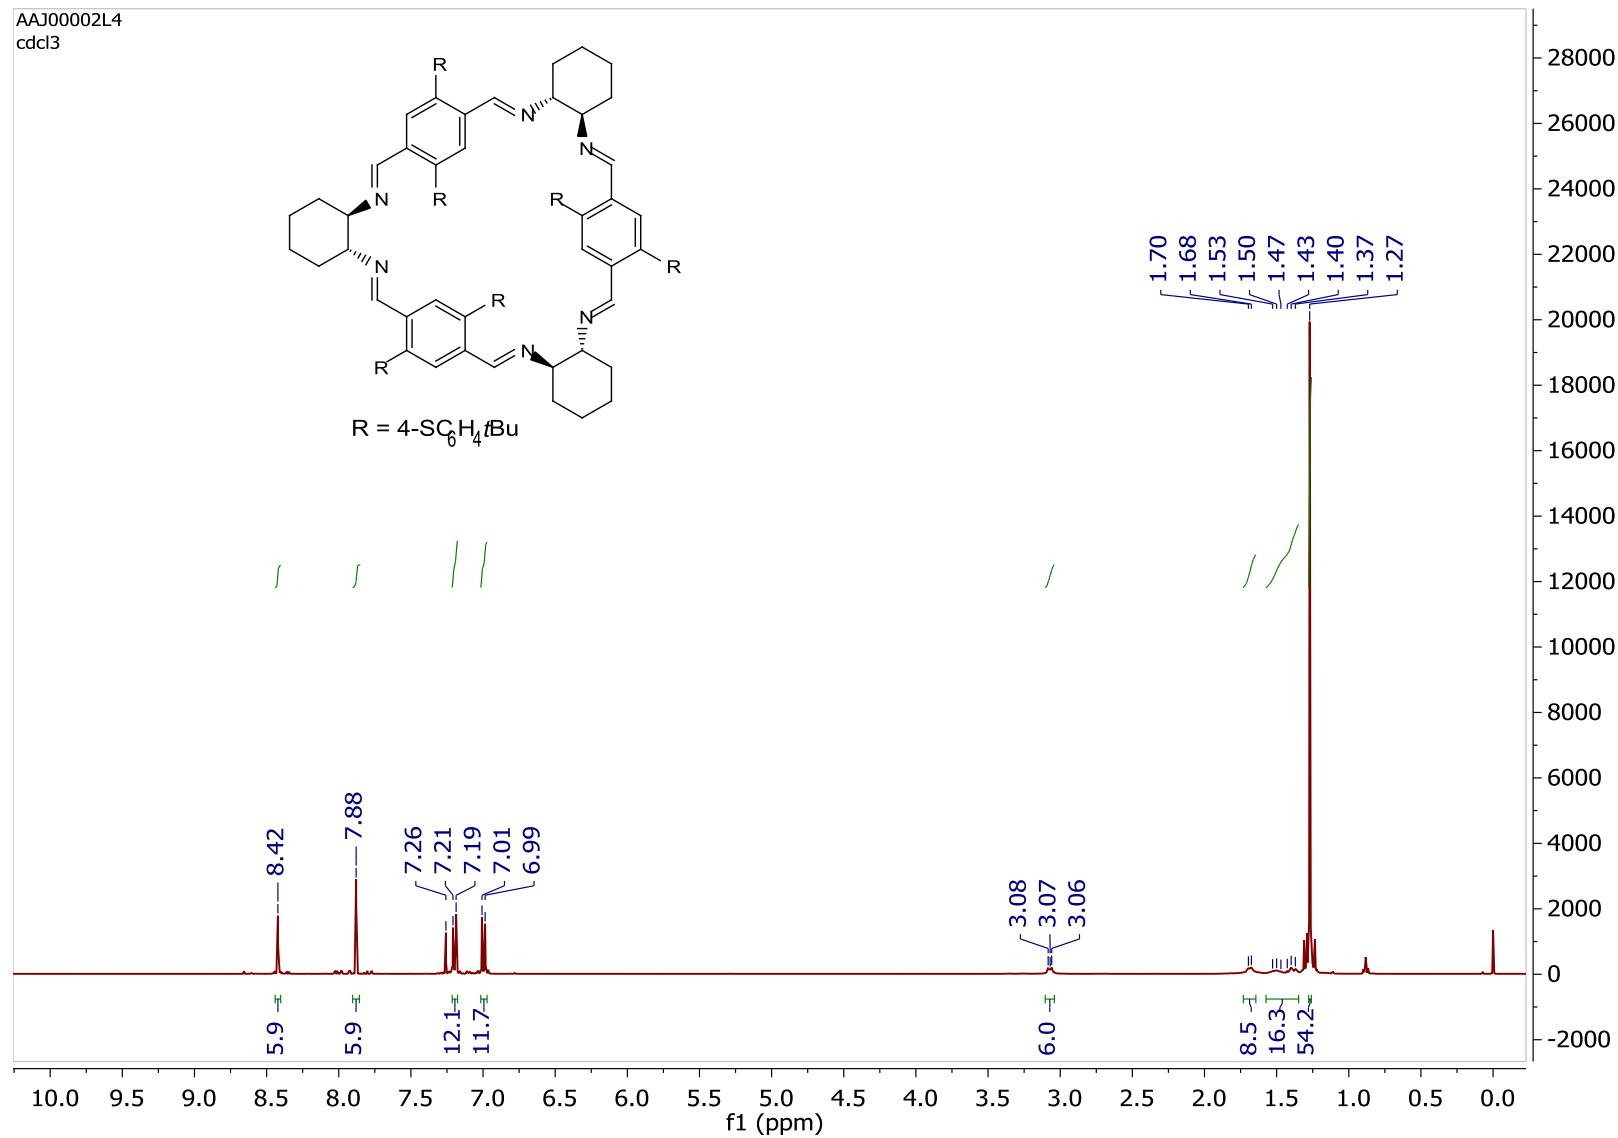

**Figure S151.** Copy of <sup>1</sup>H NMR spectrum (CDCl<sub>3</sub>, 400 MHz, RT) of **6c**.

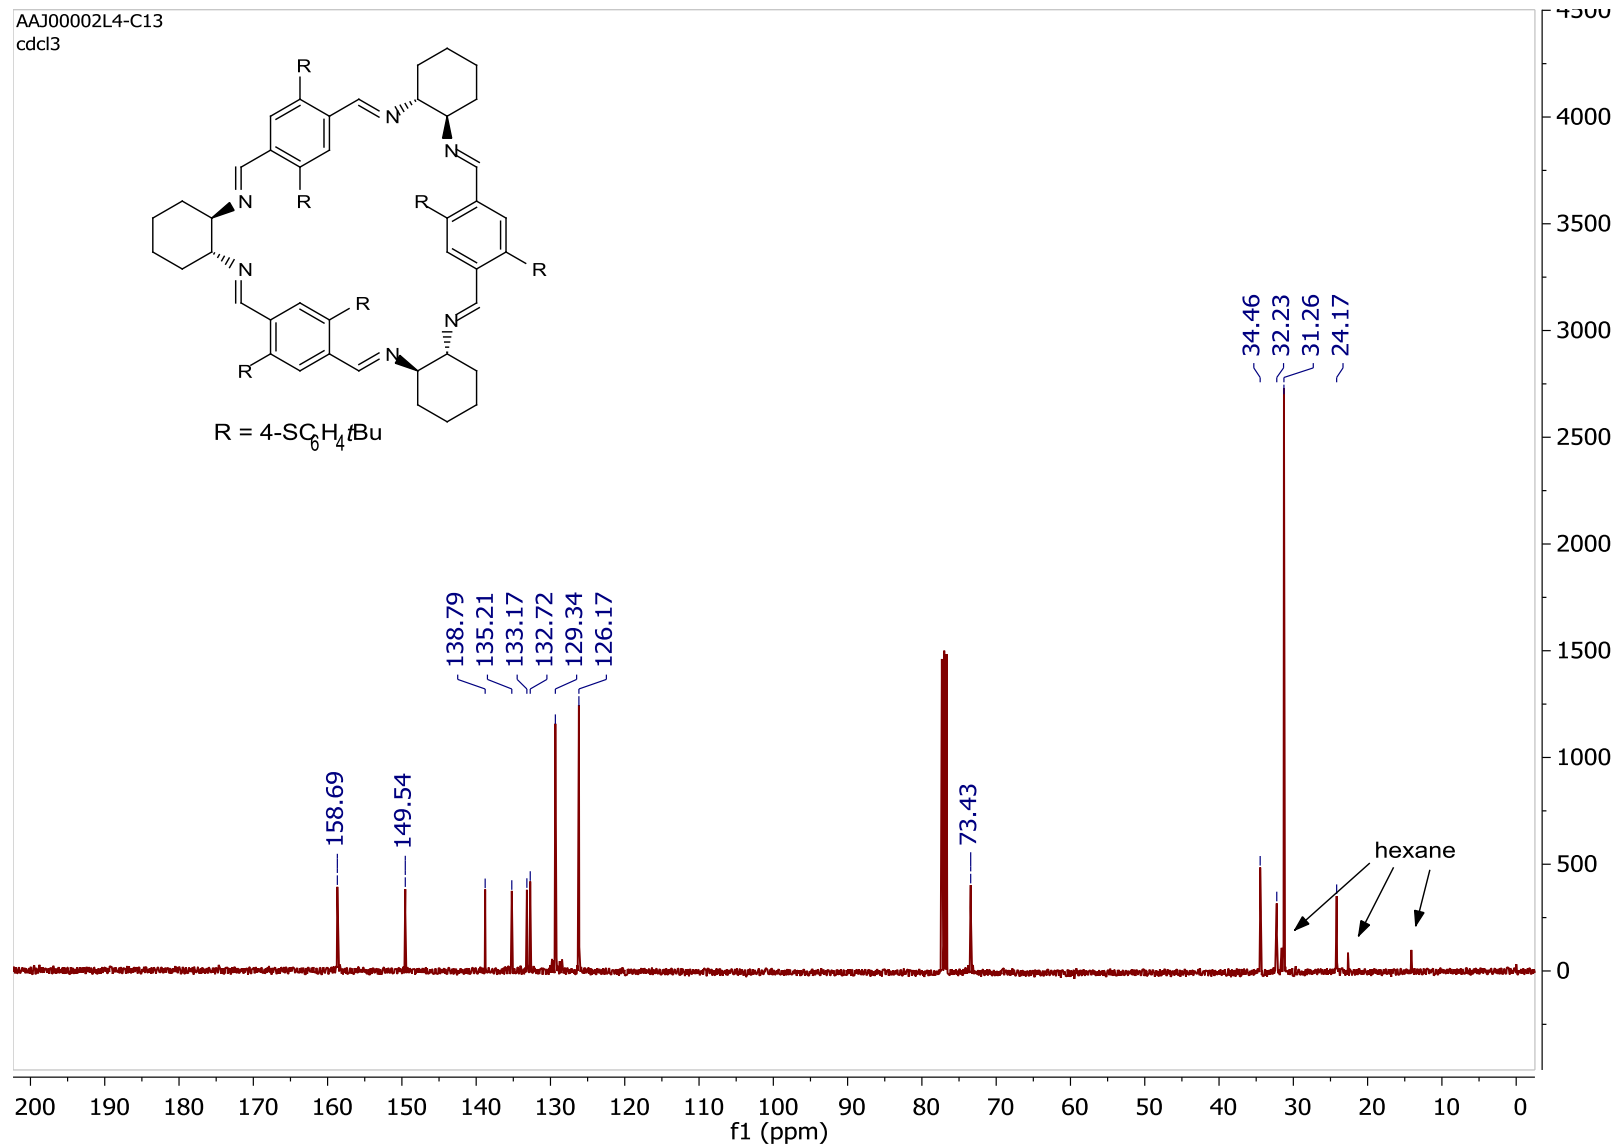

**Figure S152.** Copy of <sup>1</sup>H NMR spectrum (CDCl<sub>3</sub>, 600 MHz, RT) of **6c**.

NP15\_21\_AAJ00003BO.1.fid  
NP15\_21  
temp 298K

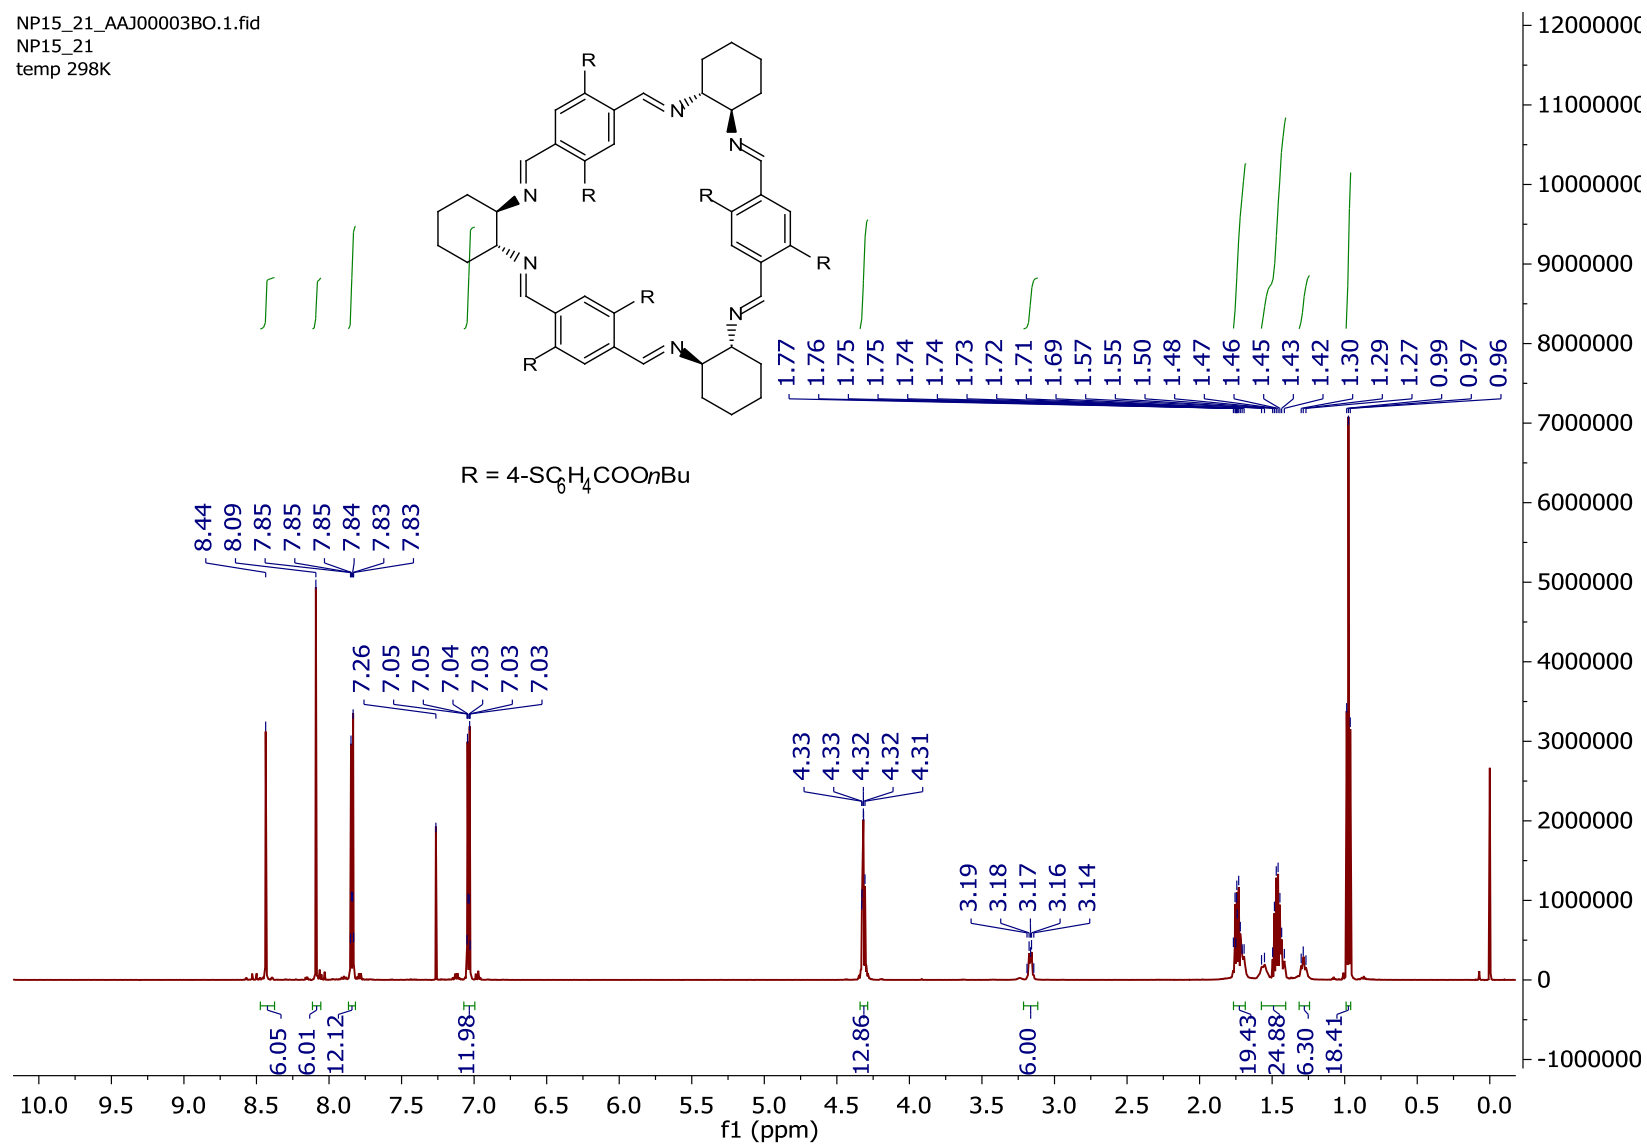

**Figure S153.** Copy of <sup>1</sup>H NMR spectrum (CDCl<sub>3</sub>, 600 MHz, RT) of **6d**.

NP15\_21\_AAJ00003BO.2.fid  
NP15\_21  
temp 298K

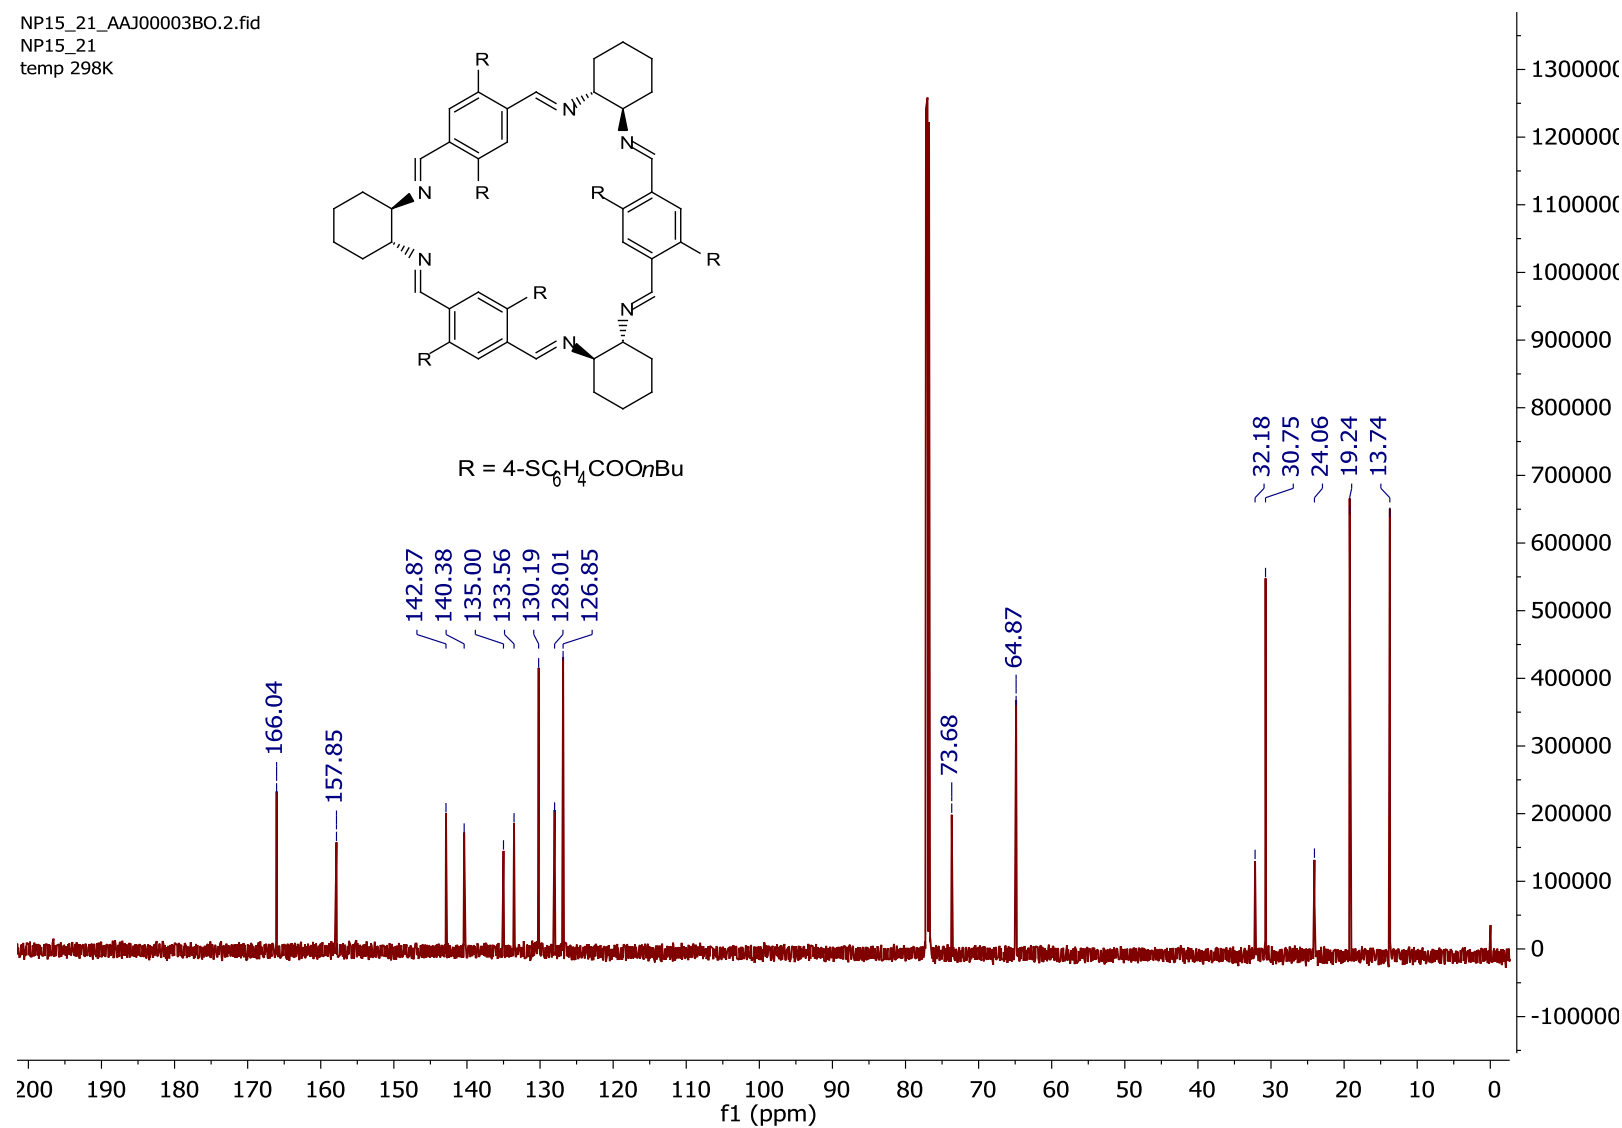

**Figure S154.** Copy of <sup>13</sup>C{<sup>1</sup>H} NMR spectrum (CDCl<sub>3</sub>, 151 MHz, RT) of **6d**.

NP35\_24\_B\_AAJ00003C3.1.fid  
NP35\_24\_B  
temp 298K

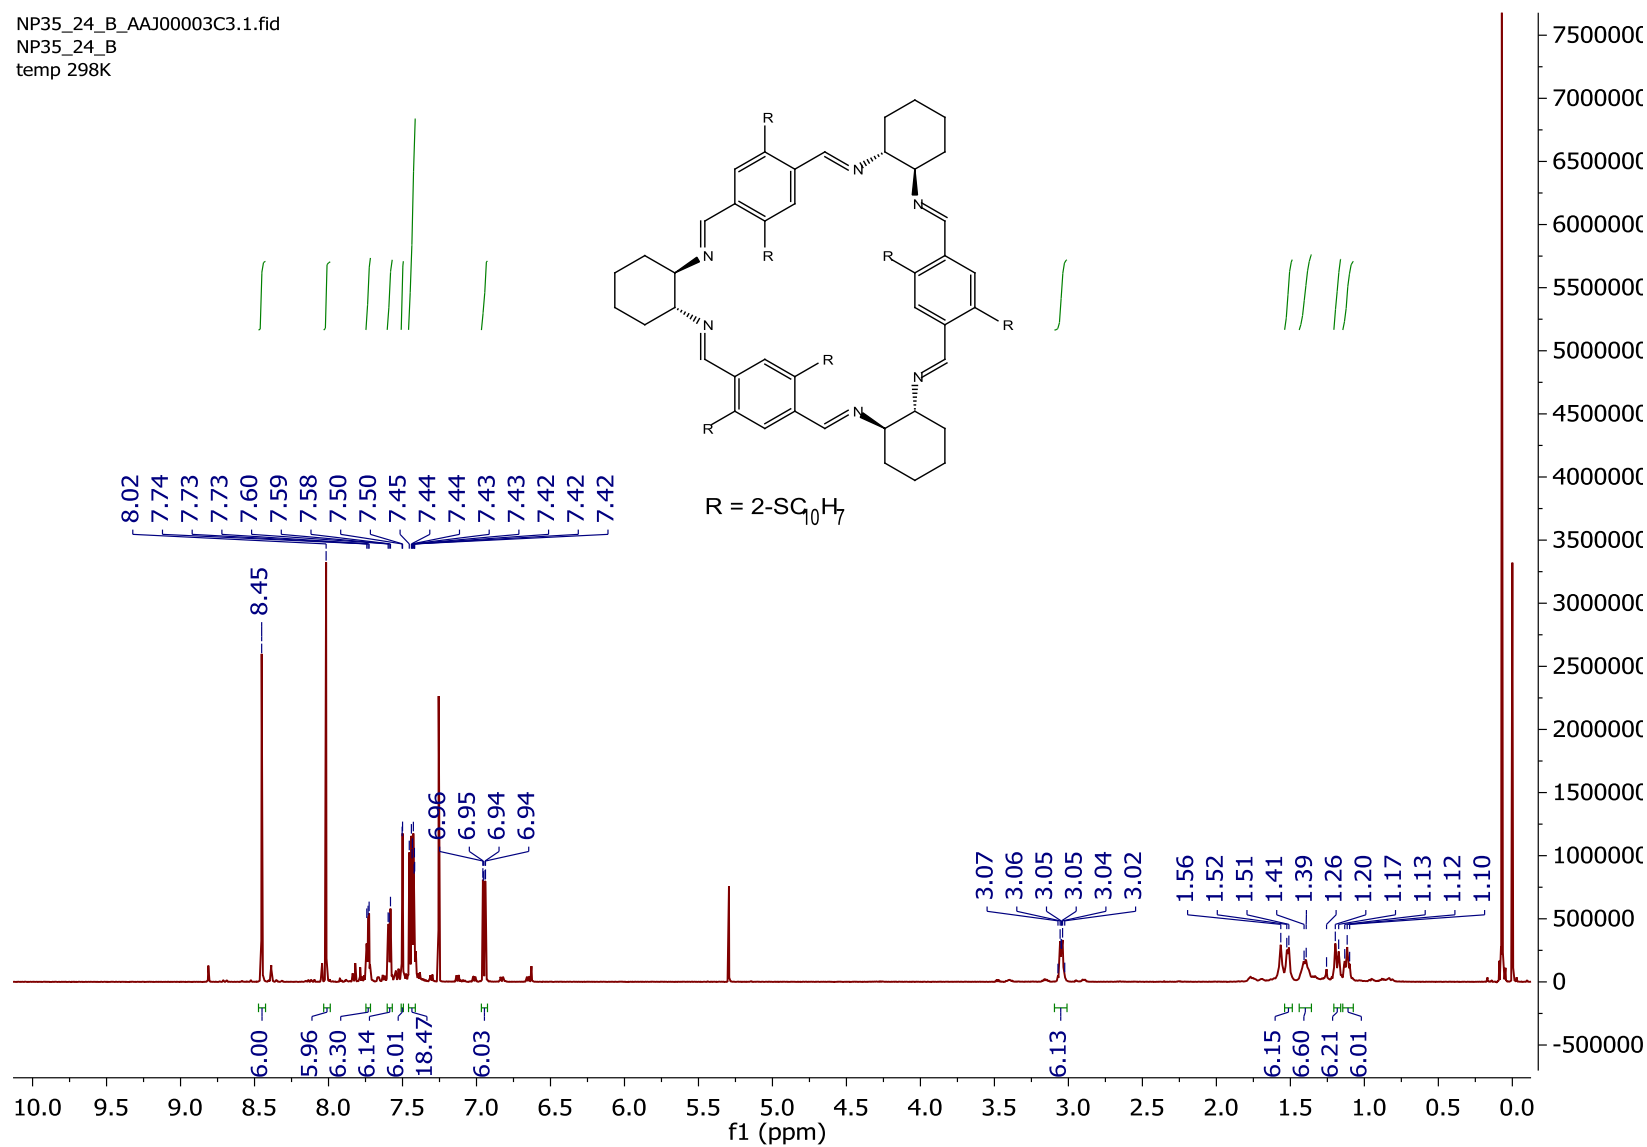

**Figure S155.** Copy of <sup>13</sup>C{<sup>1</sup>H} NMR spectrum (CDCl<sub>3</sub>, 151 MHz, RT) of **6e**.



NP35\_24\_AAJ00003BT.2.fid  
NP35\_24  
temp 298K

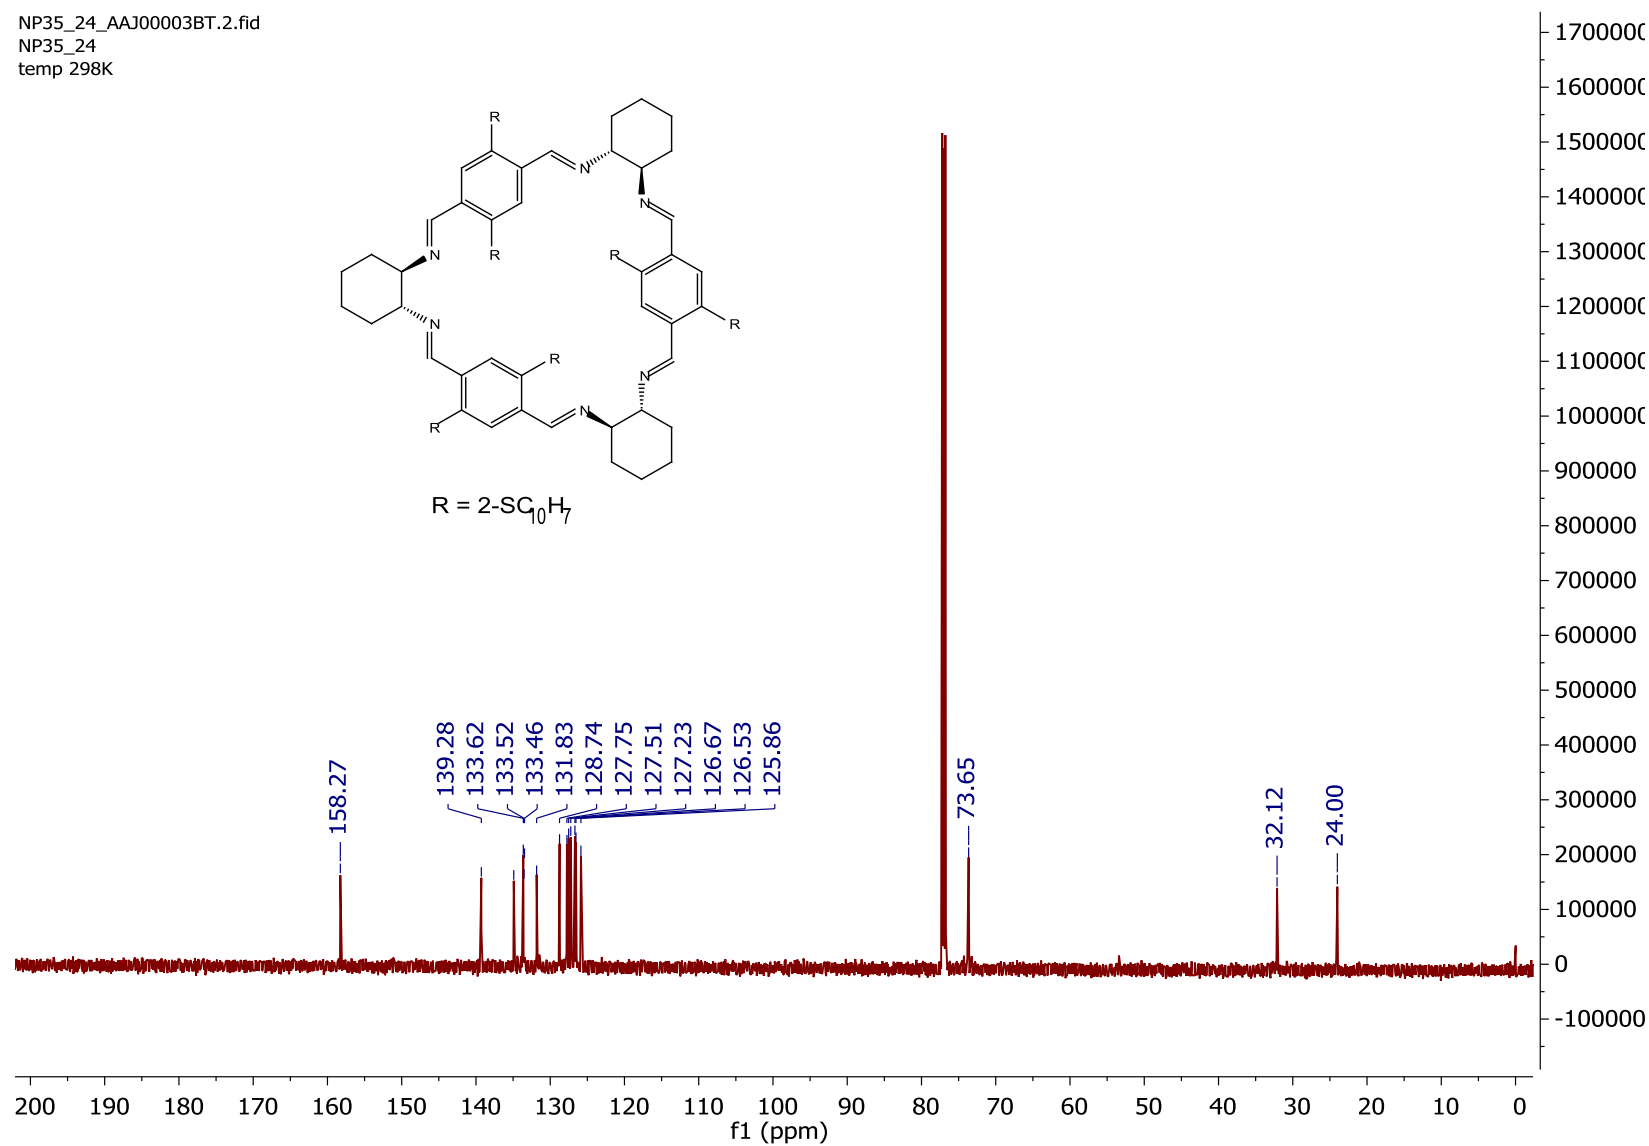

**Figure S156.** Copy of <sup>13</sup>C{<sup>1</sup>H} NMR spectrum (CDCl<sub>3</sub>, 151 MHz, RT) of **6e**.

NP54\_18\_cz.22.fid  
CDCl<sub>3</sub>

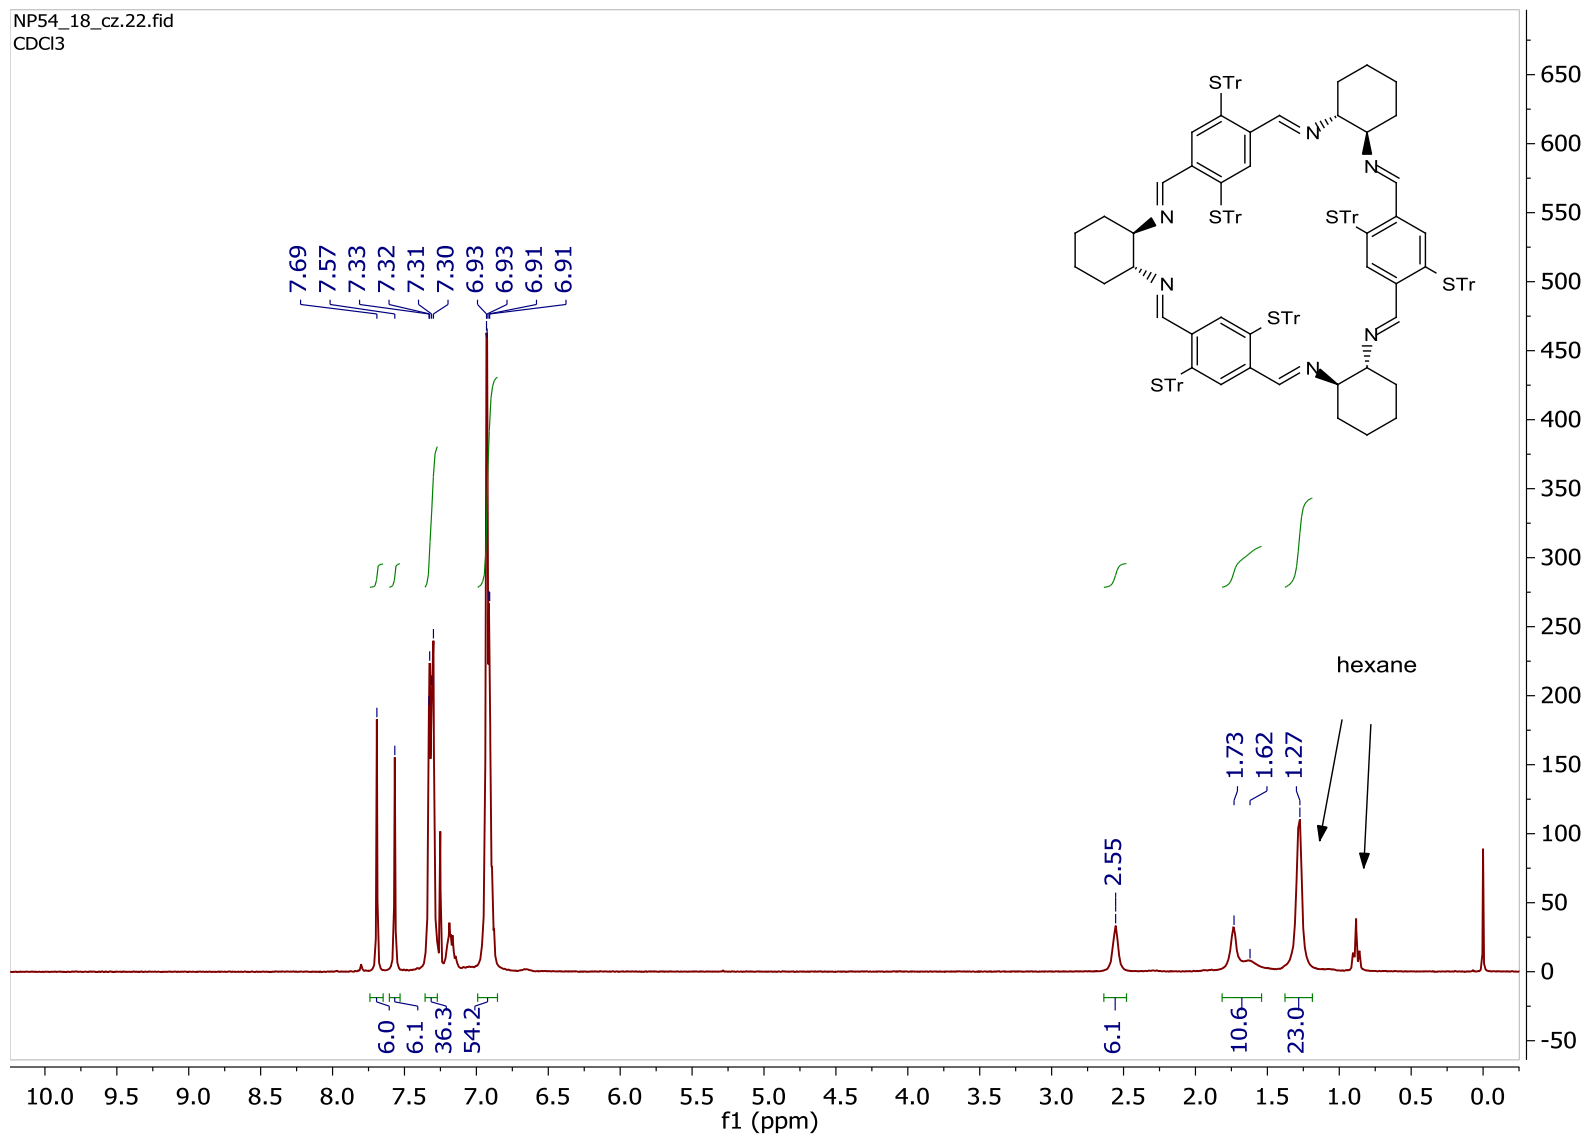

**Figure S157.** Copy of <sup>1</sup>H NMR spectrum (CDCl<sub>3</sub>, 300 MHz, RT) of **6f**.

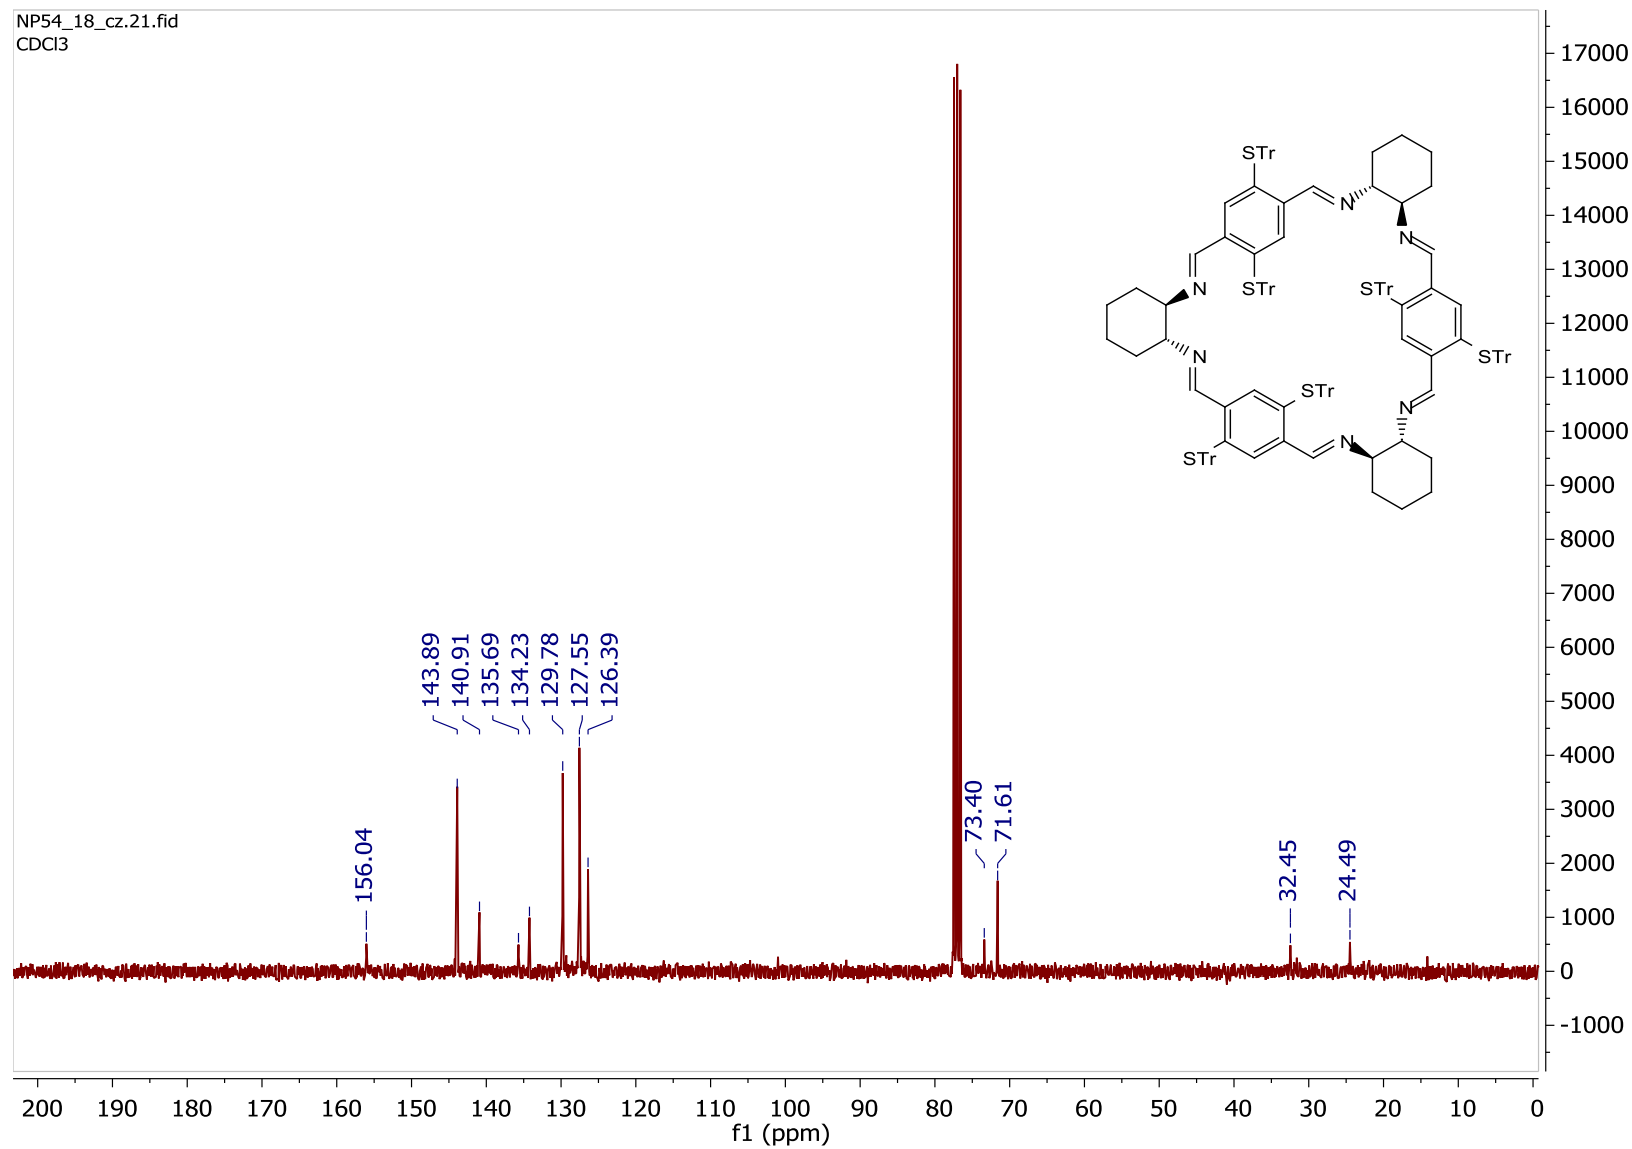

**Figure S158.** Copy of  $^{13}\text{C}\{^1\text{H}\}$  NMR spectrum ( $\text{CDCl}_3$ , 75 MHz, RT) of **6f**.

NP16\_21\_AAJ00003B3.1.fid  
NP16\_21  
temp 298K

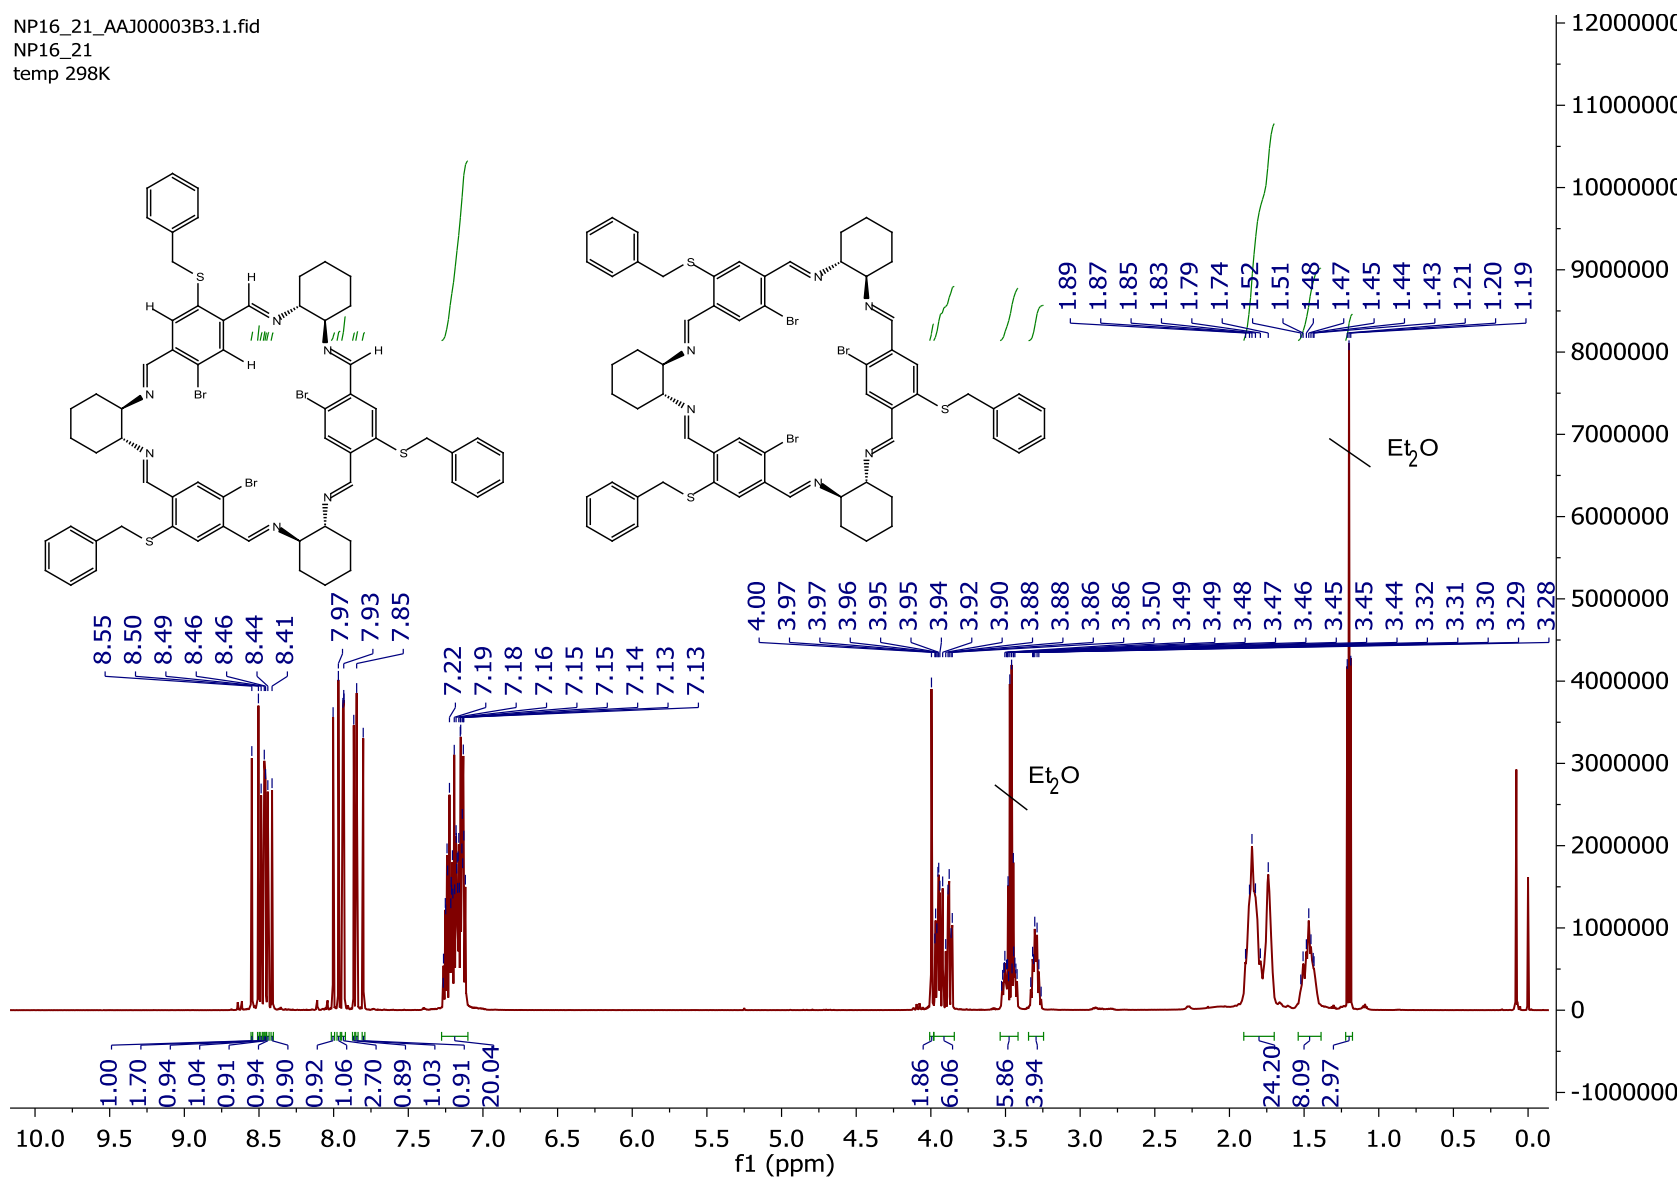

Figure S159. Copy of  $^1\text{H}$  NMR spectrum (CDCl<sub>3</sub>, 600 MHz, RT) of **6g**.

NP16\_21\_AA00003B3.2.fid  
NP16\_21  
temp 298K

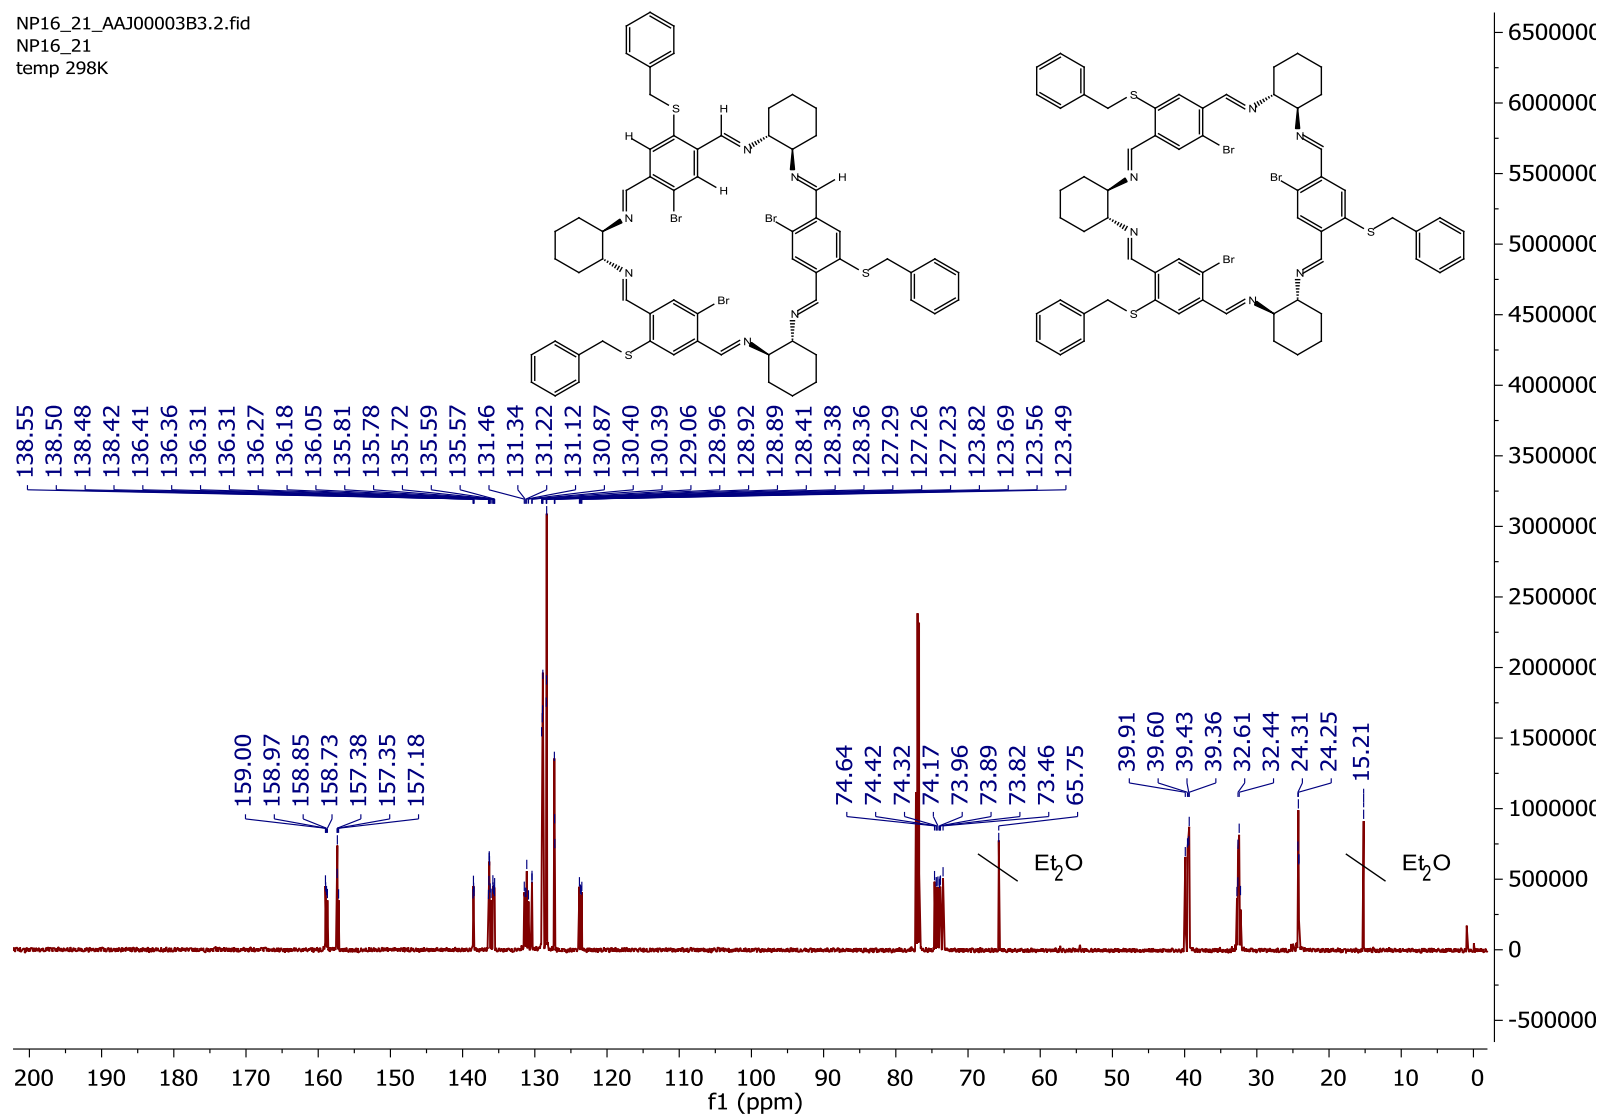

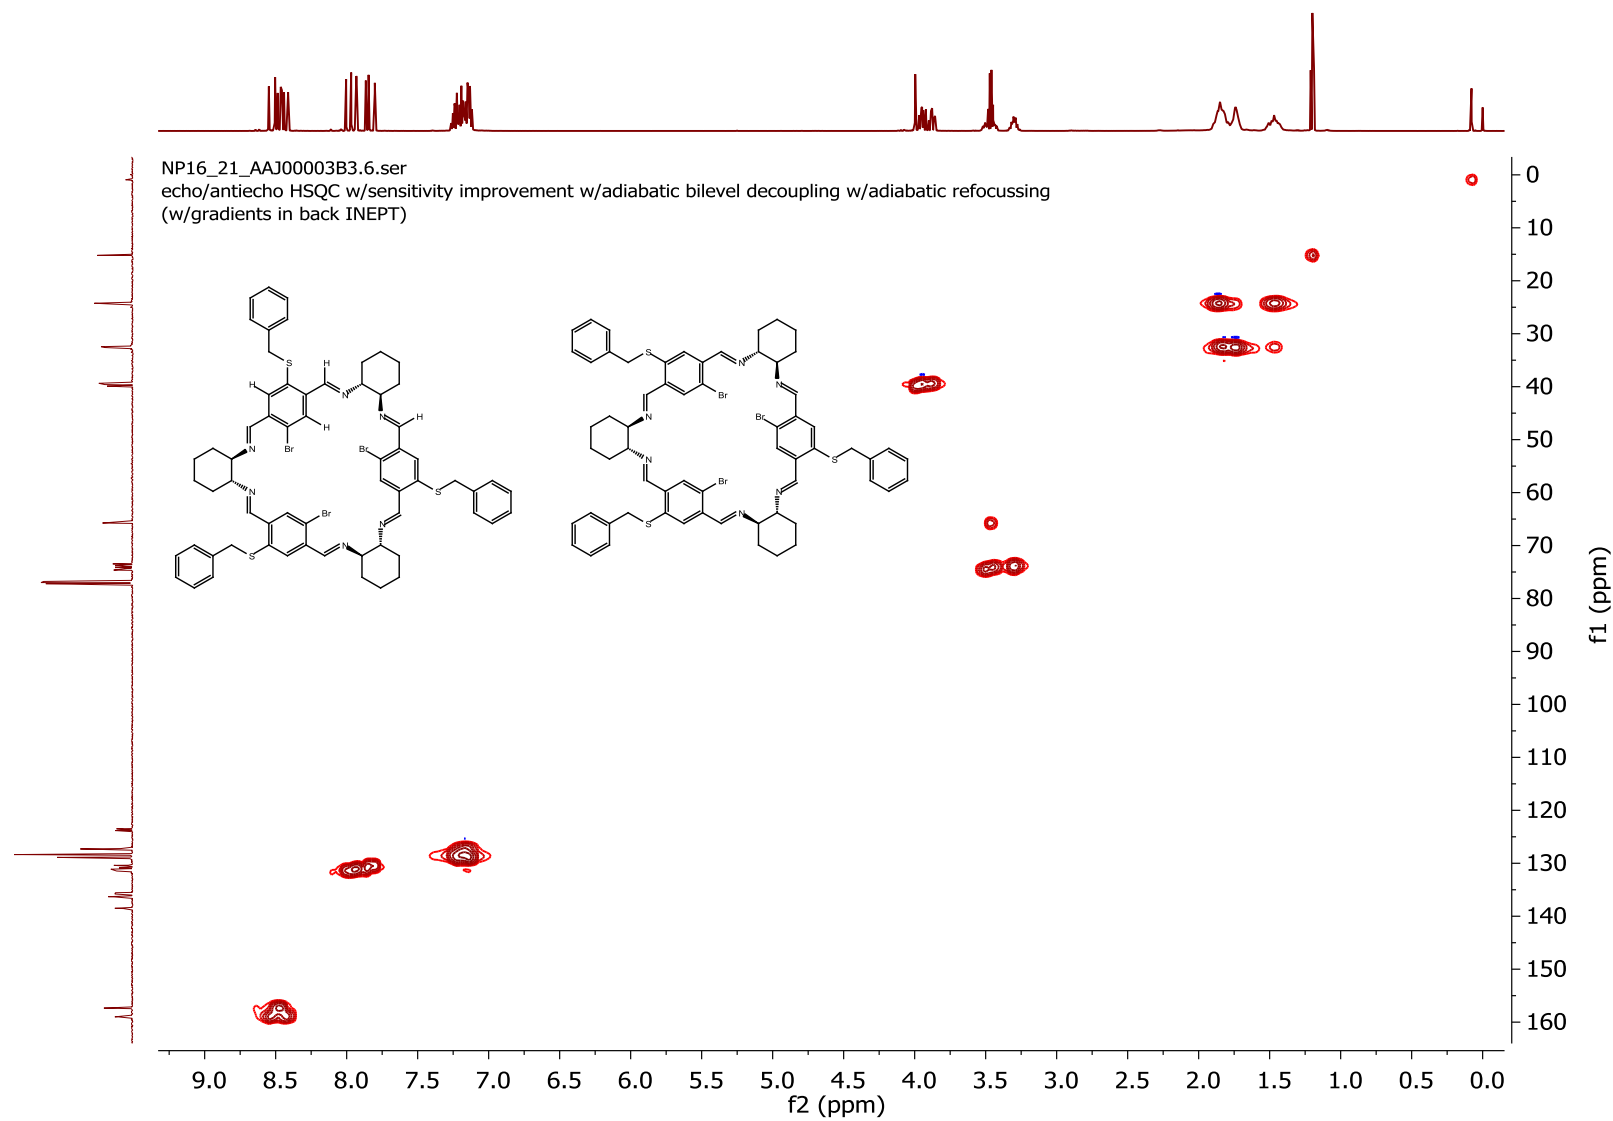

**Figure S161.** Copy of  $^{13}\text{C}\{^1\text{H}\}$ ,  $^1\text{H}$  HSQC spectrum (CDCl<sub>3</sub>, 151 MHz, RT) of **6g**.



NP37\_21\_AAJ00003B7.1.fid  
NP37\_21  
temp 298K

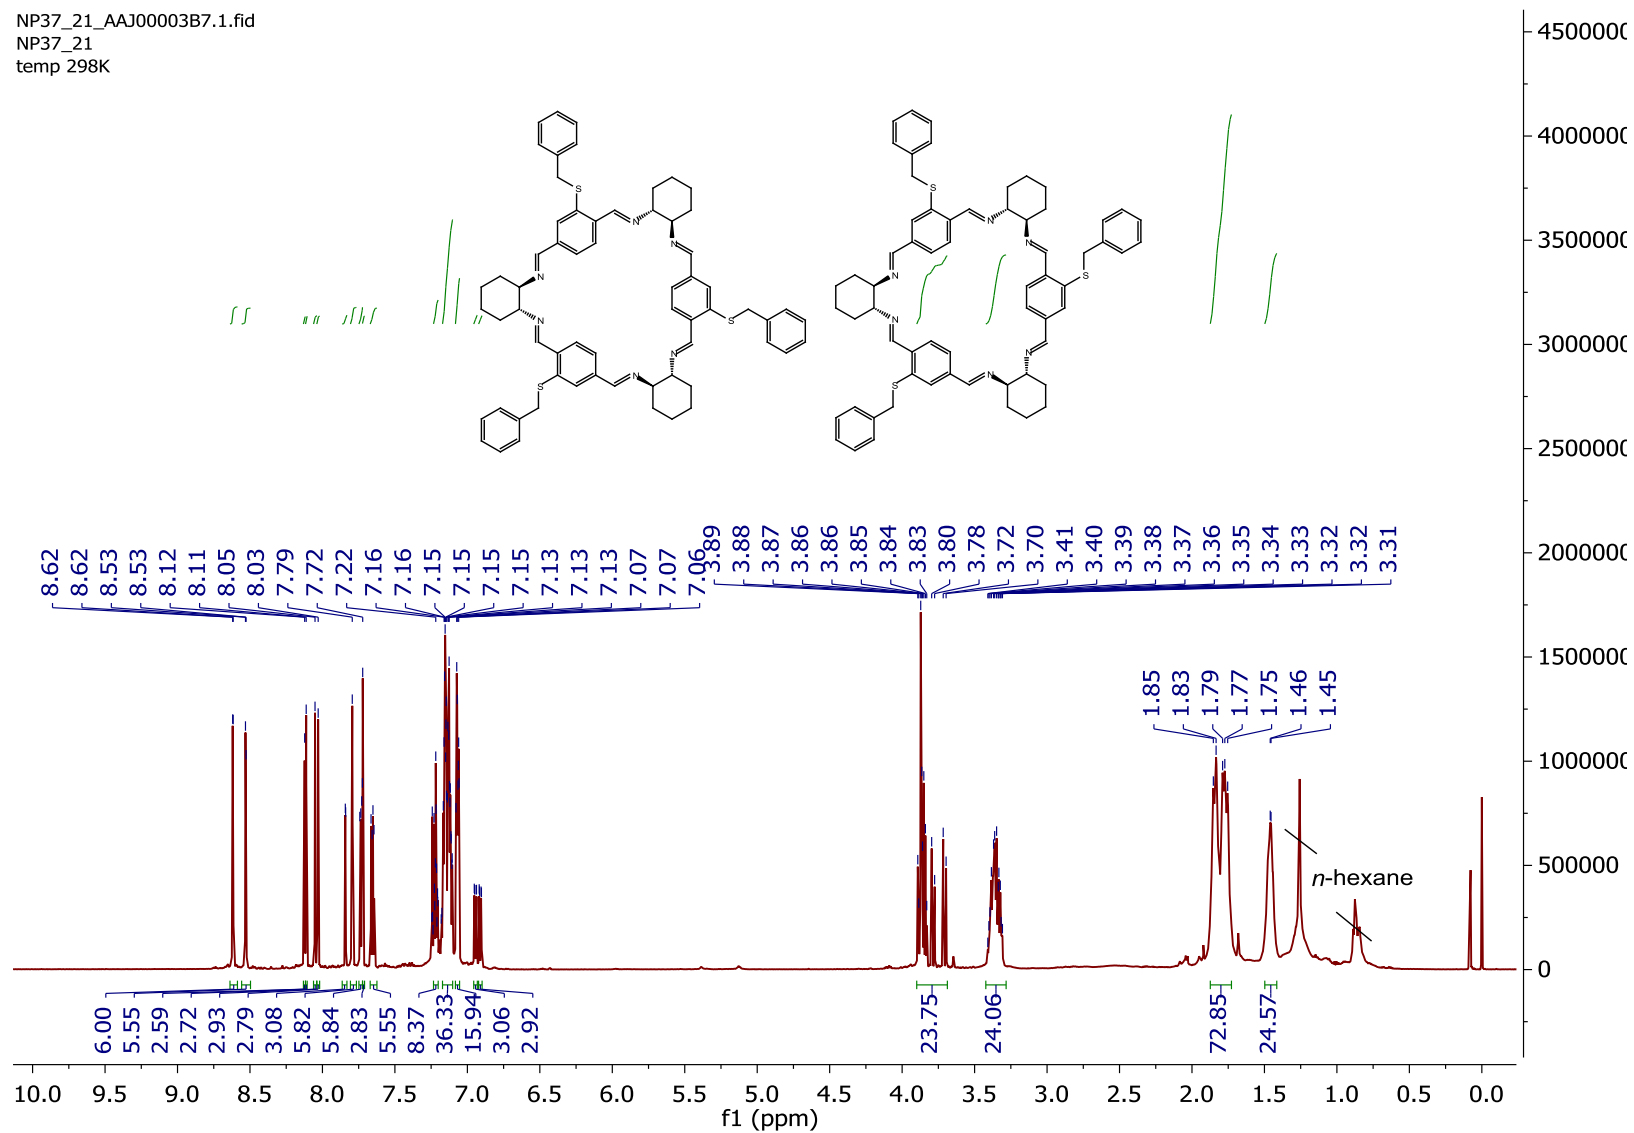

**Figure S162.** Copy of <sup>1</sup>H NMR spectrum (CDCl<sub>3</sub>, 600 MHz, RT) of 6h.

NP37\_21\_AAJ00003B7.2.fid  
NP37\_21  
temp 298K

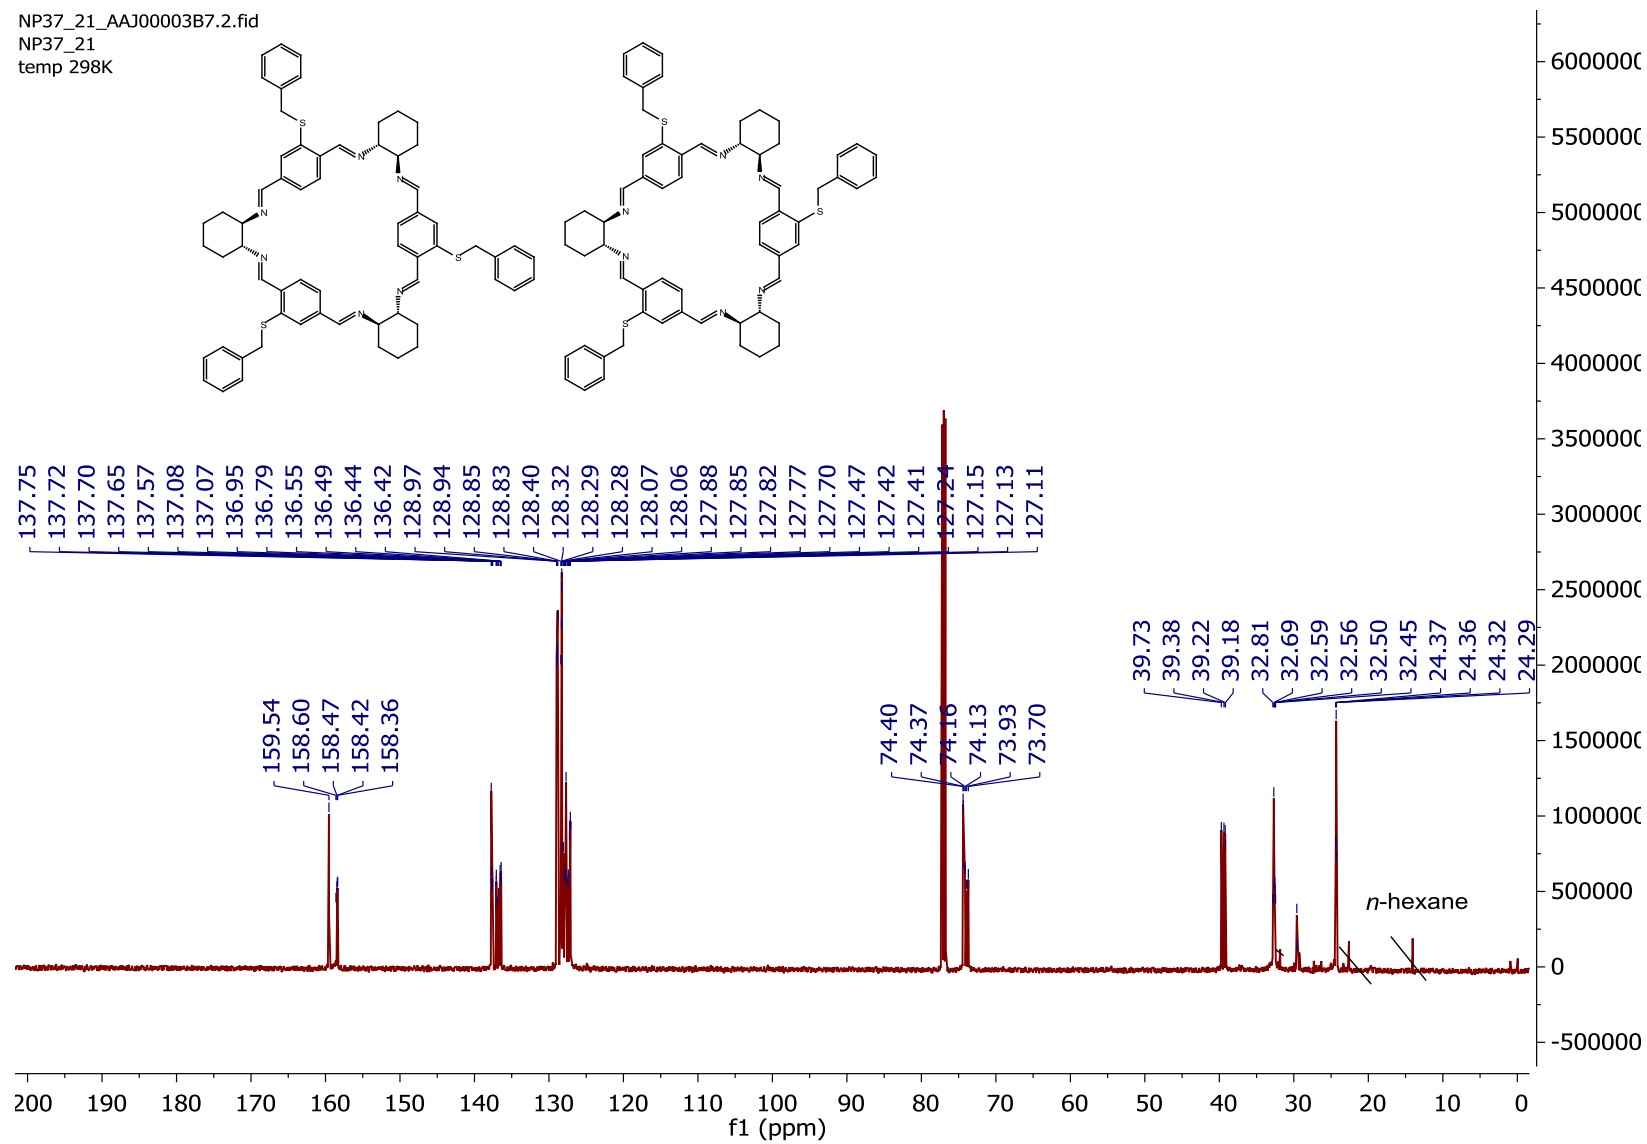

**Figure S163.** Copy of  $^{13}\text{C}\{^1\text{H}\}$  NMR spectrum ( $\text{CDCl}_3$ , 151 MHz, RT) of **6h**.

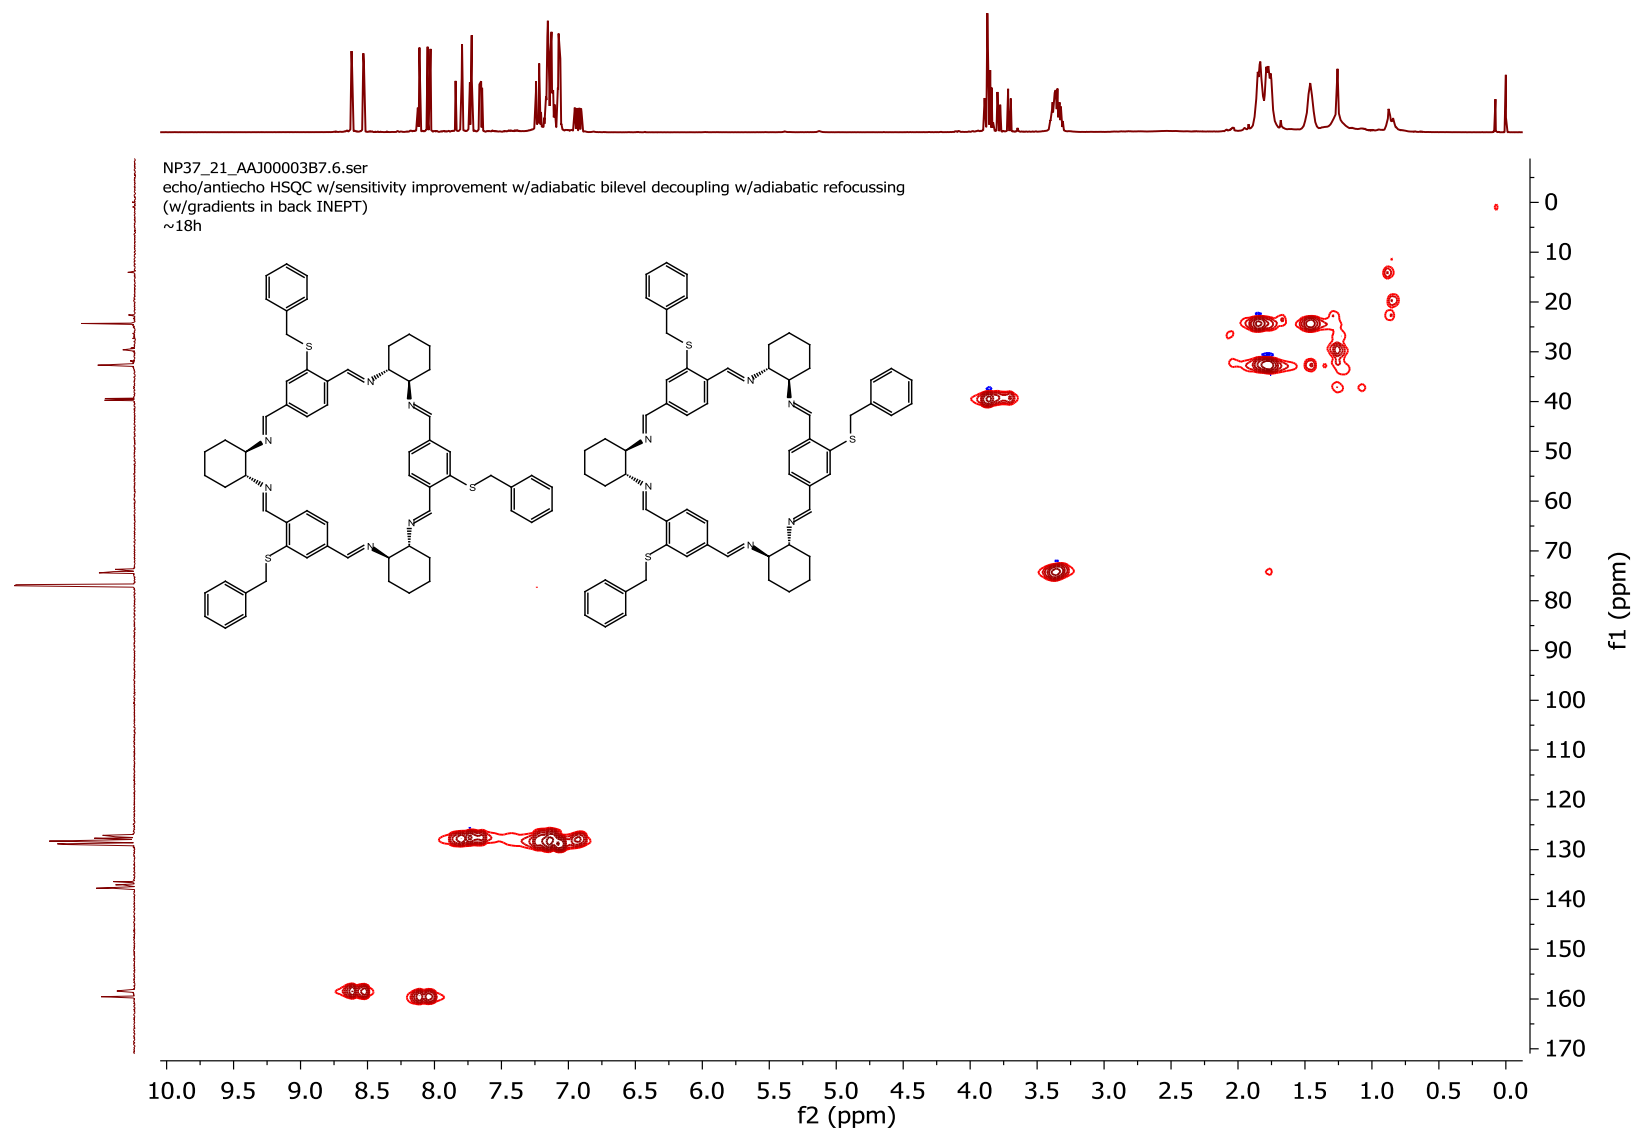

**Figure S164.** Copy of  $^{13}\text{C}\{^1\text{H}\}$ ,  $^1\text{H}$  HSQC spectrum ( $\text{CDCl}_3$ , 151 MHz, RT) of **6h**.

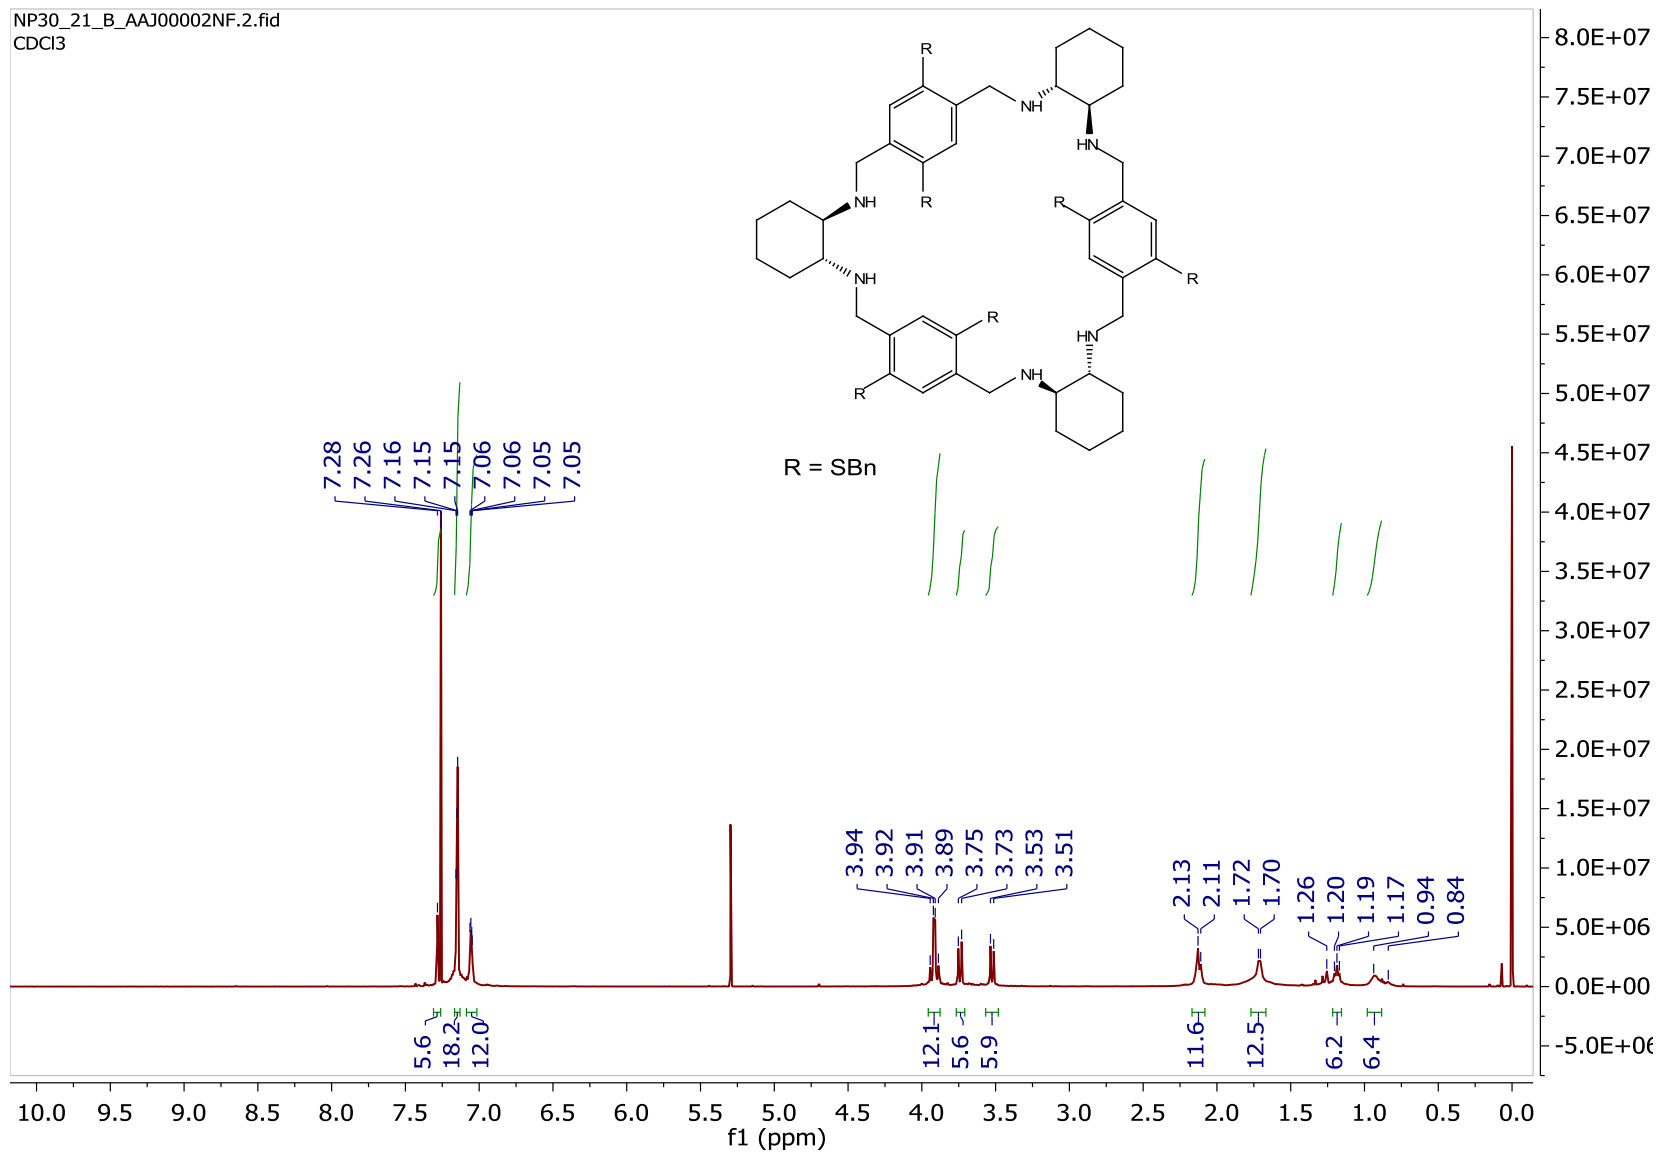

**Figure S165.** Copy of <sup>1</sup>H NMR spectrum (CDCl<sub>3</sub>, 600 MHz, RT) of **7**.

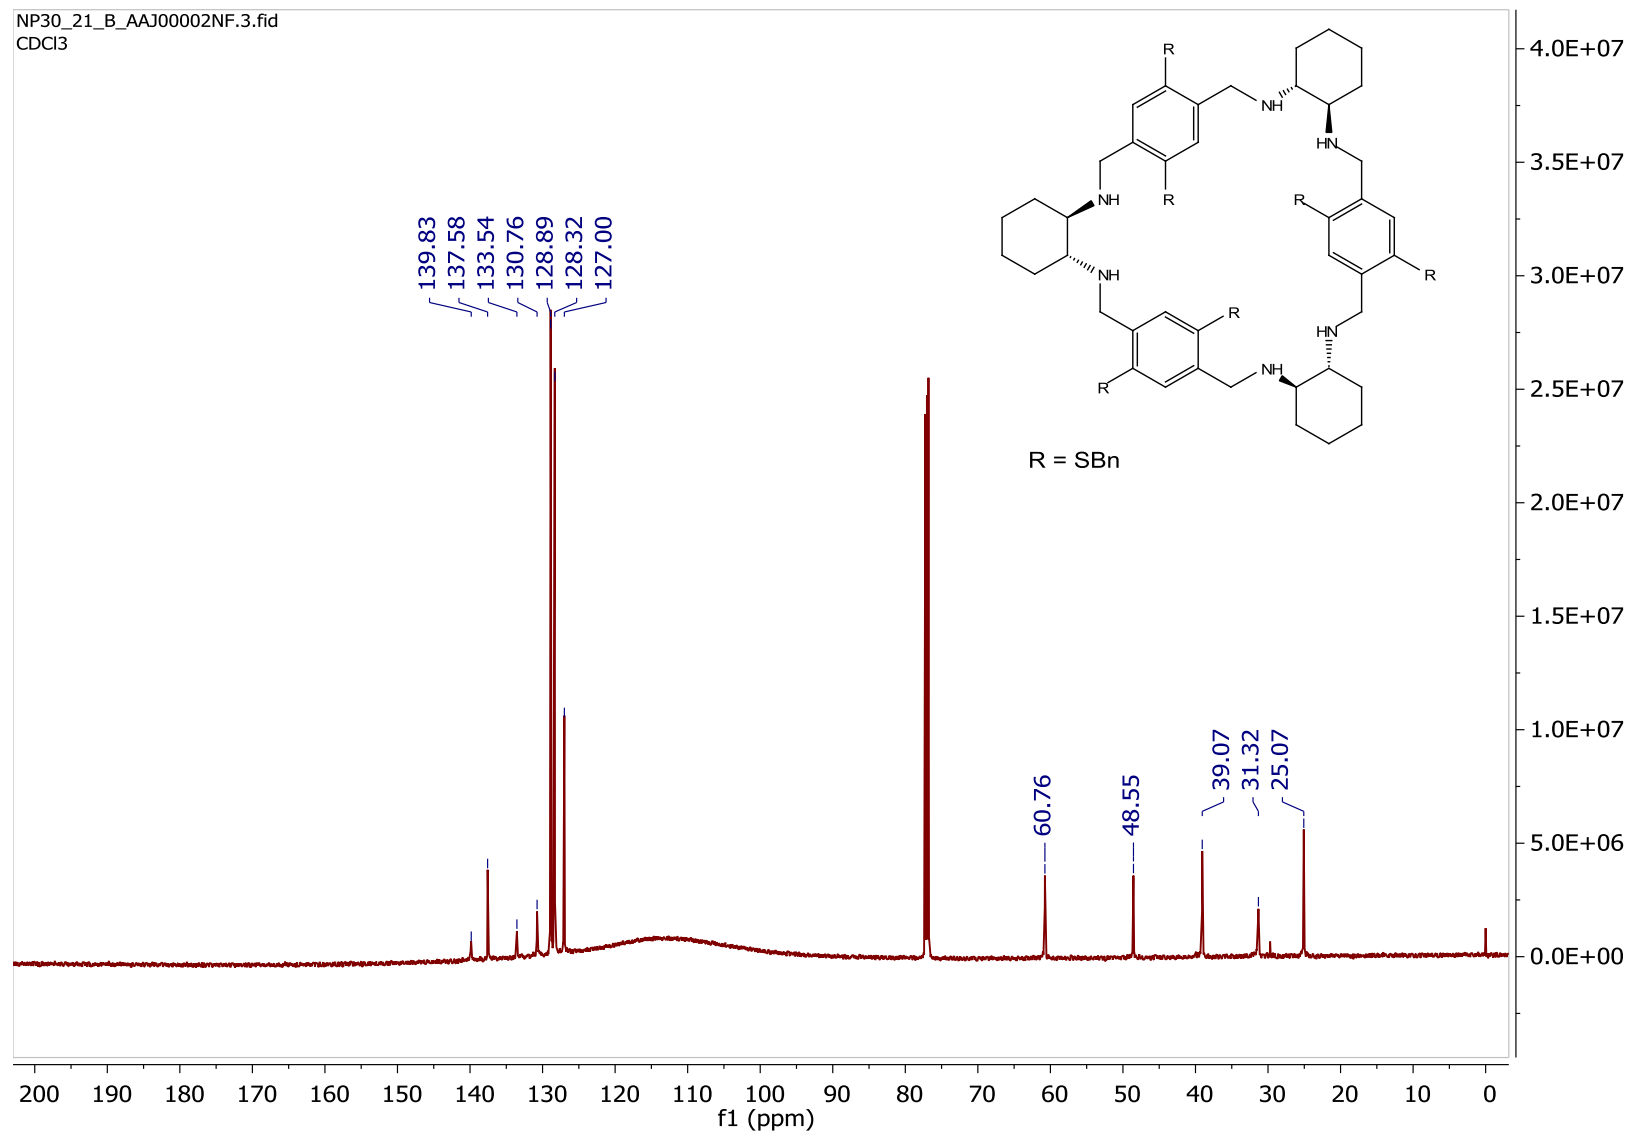

**Figure S166.** Copy of  $^{13}\text{C}\{^1\text{H}\}$  NMR spectrum ( $\text{CDCl}_3$ , 151 MHz, RT) of **7**.

## 6 References

- [1] Prusinowska, N., Bardziński, M., Janiak, A., Skowronek, P., Kwit, M. Sterically Crowded Trianglimines—Synthesis, Structure, Solid-State Self-Assembly, and Unexpected Chiroptical Properties. *Chem. Asian J.*, **13**, 2691-2699 (2018).
- [2] Scigress, version 2.5; Fujitsu Ltd.: Tokyo, Japan, 2013.
- [3] Frisch, M. J. et al. Gaussian 16, Revision C.01, Gaussian, Inc.: Wallingford, CT, USA, 2016.
- [4] Becke, A. D. Density-functional thermochemistry. III. The role of exact exchange. *J. Chem. Phys.* **98**, 5648-5652 (1993).
- [5] Grimme, S., Ehrlich, S., Goerigk, L. Effect of the damping function in dispersion corrected density functional theory. *J. Comp. Chem.* **32**, 1456-1465 (2011).
- [6] Zhao, Y., Truhlar, D. G. The M06 suite of density functionals for main group thermochemistry, thermochemical kinetics, noncovalent interactions, excited states, and transition elements: Two new functionals and systematic testing of four M06-class functional and 12 other functionals. *Theor. Chem. Acc.* **120**, 215–241 (2008).
- [7] Pescitelli, G., Bruhn, T. Good Computational Practice in the Assignment of Absolute Configurations by TDDFT Calculations of ECD Spectra. *Chirality* **28**, 466-474 (2016).
- [8] Kwit, M., Rozwadowska, M. D., Gawroński, J., Grajewska, A. Density Functional Theory Calculations of the Optical Rotation and Electronic Circular Dichroism: The Absolute Configuration of the Highly Flexible trans-Isocytoazone Revised. *J. Org. Chem.* **74**, 8051-8063 (2009).
- [9] Yanai, T., Tew, D., Handy, N. A new hybrid exchange-correlation functional using the Coulomb-attenuating method (CAM-B3LYP). *Chem. Phys. Lett.* **393**, 51–57 (2004).
- [10] Chai, J.-D., Head-Gordon, M. Long-range corrected hybrid density functionals with damped atom-atom dispersion corrections. *Phys. Chem. Chem. Phys.* **10**, 6615-6620 (2008).
- [11] Harada, N., Stephens, P. ECD Cotton effect approximated by the Gaussian curve and other methods. *Chirality* **22**, 229-233 (2010).
- [12] CrysAlis PRO 1.171.41.110a, Rigaku Oxford Diffraction, 2021.
- [13] Sheldrick, G. M. SHELXT - Integrated space-group and crystal-structure determination. *Acta Crystallogr.* **A71**, 3-8 (2015).
- [14] Sheldrick, G. M. Crystal structure refinement with SHELXL. *Acta Crystallogr.* **C71**, 3-8 (2015).
- [15] Parsons, S., Flack, H. D., Wagner, T. Use of intensity quotients and differences in absolute structure refinement. *Acta Crystallogr.* **B69**, 249-259 (2013).
- [16] Dolomanov, O.V., Bourhis, L.J., Gildea, R.J., Howard, J.A.K., Puschmann, H. OLEX2: a complete structure solution, refinement and analysis program. *J. Appl. Cryst.* **42**, 339-341 (2009).
- [17] Macrae, C. F., Sovago, I., Cottrell, S. J., Galek, P. T. A., McCabe, P., Pidcock, E., Platings, M., Shields, G. P., Stevens, J. S., Towler, M., Wood, P. A. Mercury 4.0: from visualization to analysis, design and prediction. *J. Appl. Cryst.* **53**, 226-235 (2020).
